# Supplementary material for: The Evolution and Subtypes of Waldenstrom Macroglobulinemia: Findings from a Multi-omic Analysis of 249 Treatment Naive MYD88L265P Mutated Patients.
Source: Research Square preprint supplement (doi:10.21203/rs.3.rs-6473628/v1), 2025-04-23
Supplement: Supplementary file 1 [file 830774fad0ddf32c2b310507.xlsx]

## Sheet: PCL_vs_BCL
	Chr	Gene Symbol	logFC	AveExpr	t	P.Value	adj.P.Val	B
ENSG00000164850.15	chr7	GPER1	4.46568	4.43153	22.9588	3.13803e-63	6.31718e-59	133.189
ENSG00000112679.14	chr6	DUSP22	2.34119	8.13317	20.7681	3.98833e-56	4.01445e-52	117.151
ENSG00000175274.18	chr11	TP53I11	-2.79866	4.64571	-18.4509	2.18768e-48	1.468e-44	99.3827
ENSG00000111962.8	chr6	UST	-3.53668	1.64799	-17.9113	1.47383e-46	7.41739e-43	94.5874
ENSG00000117602.12	chr1	RCAN3	-3.01531	4.17955	-17.7586	4.86918e-46	1.96043e-42	93.9931
ENSG00000138439.12	chr2	FAM117B	-1.51546	4.9458	-16.5091	8.93416e-42	2.99756e-38	84.3249
ENSG00000196586.14	chr6	MYO6	3.49339	3.06482	16.4695	1.22115e-41	3.51185e-38	83.9385
ENSG00000125245.12	chr13	GPR18	-2.46052	4.22025	-16.066	2.94281e-40	7.40523e-37	80.8378
ENSG00000168234.13	chr18	TTC39C	-2.12004	3.81191	-15.8088	2.23965e-39	5.00961e-36	78.8083
ENSG00000235621.8	chr20	LINC00494	-3.69621	3.67113	-15.7073	4.98968e-39	9.13157e-36	77.9871
ENSG00000171408.14	chr6	PDE7B	-4.15711	0.321966	-15.7177	4.59771e-39	9.13157e-36	77.2005
ENSG00000107104.18	chr9	KANK1	2.93512	4.51952	15.5938	1.22243e-38	2.05073e-35	77.1608
ENSG00000185155.11	chr1	MIXL1	2.66483	3.29636	15.4587	3.55061e-38	5.49825e-35	76.0708
ENSG00000106415.13	chr7	GLCCI1	1.48778	6.40309	15.4251	4.62796e-38	6.65467e-35	75.8249
ENSG00000165434.8	chr11	PGM2L1	-1.83335	3.15822	-15.3204	1.0573e-37	1.41897e-34	74.9471
ENSG00000157483.8	chr15	MYO1E	-3.9546	2.78656	-15.0117	1.20807e-36	1.51997e-33	72.4932
ENSG00000182022.18	chr10	CHST15	1.79212	7.27824	14.9263	2.3691e-36	2.80543e-33	71.9123
ENSG00000165905.18	chr11	LARGE2	-2.70838	4.01139	-14.3156	2.90845e-34	3.13138e-31	67.17
ENSG00000145730.20	chr5	PAM	1.95828	4.06164	14.3135	2.95545e-34	3.13138e-31	67.1576
ENSG00000178607.16	chr17	ERN1	1.70767	5.48652	14.2186	6.23296e-34	5.97504e-31	66.393
ENSG00000153250.20	chr2	RBMS1	-1.70039	5.14053	-14.1844	8.15837e-34	7.46528e-31	66.1419
ENSG00000215386.12	chr21	MIR99AHG	5.3732	-2.3067	14.2451	5.06263e-34	5.09579e-31	65.1344
ENSG00000153944.11	chr17	MSI2	1.09304	7.34257	14.0548	2.25739e-33	1.9758e-30	65.096
ENSG00000165238.16	chr9	WNK2	5.27211	3.59287	13.9708	4.36466e-33	3.37942e-30	64.4888
ENSG00000198910.13	chrX	L1CAM	-4.21017	0.696896	-14.0153	3.07905e-33	2.47937e-30	64.4047
ENSG00000157470.12	chr15	FAM81A	-3.54279	-0.291401	-14.0238	2.87923e-33	2.41507e-30	64.0671
ENSG00000103489.11	chr16	XYLT1	-2.48784	1.94091	-13.8345	1.27108e-32	9.13859e-30	63.2683
ENSG00000254211.5	chr5	LINC01485	3.49738	-1.67658	13.8723	9.44752e-33	7.044e-30	62.5657
ENSG00000102471.14	chr13	NDFIP2	2.11558	3.16381	13.6849	4.10109e-32	2.84686e-29	62.2691
ENSG00000214145.6	chr3	LINC00887	4.43983	-0.168538	13.609	7.42714e-32	4.82309e-29	61.2187
ENSG00000138738.10	chr4	PRDM5	5.80366	1.0921	13.5491	1.18648e-31	7.46408e-29	61.0791
ENSG00000134215.16	chr1	VAV3	-1.63378	5.30918	-13.494	1.82585e-31	1.08107e-28	60.7667
ENSG00000108679.13	chr17	LGALS3BP	3.01289	4.84799	13.4506	2.56102e-31	1.43211e-28	60.4435
ENSG00000205302.7	chr5	SNX2	-0.899734	7.54591	-13.4527	2.51948e-31	1.43211e-28	60.4124
ENSG00000005471.17	chr7	ABCB4	-3.16748	2.64251	-13.3727	4.70419e-31	2.49211e-28	59.8125
ENSG00000111885.7	chr6	MAN1A1	1.99389	8.21805	13.3735	4.6751e-31	2.49211e-28	59.8005
ENSG00000266265.3	chr7	KLF14	-5.34759	-1.43762	-13.4995	1.74822e-31	1.06647e-28	59.5689
ENSG00000152078.10	chr1	TMEM56	-3.19339	3.33326	-13.2948	8.63896e-31	4.45926e-28	59.2488
ENSG00000101400.5	chr20	SNTA1	1.56682	4.25126	13.2663	1.07921e-30	5.29891e-28	59.0264
ENSG00000144229.12	chr2	THSD7B	4.10878	-1.15332	13.274	1.01608e-30	5.11367e-28	58.3515
ENSG00000226471.6	chr22	Z93930.2	1.27552	0.790434	13.1927	1.91363e-30	9.17222e-28	58.2074
ENSG00000125967.16	chr20	NECAB3	1.13832	3.12574	13.0458	5.99962e-30	2.74496e-27	57.3417
ENSG00000144218.18	chr2	AFF3	-1.53028	7.06112	-12.918	1.61864e-29	7.24109e-27	56.2824
ENSG00000143603.19	chr1	KCNN3	2.88715	3.49684	12.8696	2.35598e-29	1.03105e-26	55.9906
ENSG00000012660.14	chr6	ELOVL5	-1.02473	6.95616	-12.7866	4.4812e-29	1.91938e-26	55.2694
ENSG00000164983.7	chr8	TMEM65	-1.37776	3.94946	-12.7704	5.08017e-29	2.1306e-26	55.2274
ENSG00000205476.9	chr14	CCDC85C	1.13897	3.54358	12.6424	1.36693e-28	5.61585e-26	54.2524
ENSG00000105261.7	chr19	OVOL3	4.18353	-1.77688	12.6112	1.7399e-28	7.00519e-26	53.1635
ENSG00000107679.14	chr10	PLEKHA1	-1.41629	4.45843	-12.5014	4.05643e-28	1.60117e-25	53.1517
ENSG00000115159.16	chr2	GPD2	1.49288	6.73015	12.4646	5.38866e-28	2.08614e-25	52.8016
ENSG00000136205.17	chr7	TNS3	1.18213	7.81755	12.4614	5.52096e-28	2.09703e-25	52.775
ENSG00000012779.11	chr10	ALOX5	-2.36796	6.12446	-12.4308	6.99042e-28	2.606e-25	52.5656
ENSG00000151490.14	chr12	PTPRO	-2.44753	2.73838	-12.3157	1.69421e-27	5.98352e-25	51.7601
ENSG00000163683.12	chr4	SMIM14	-2.76076	6.34811	-12.3247	1.58055e-27	5.68178e-25	51.7575
ENSG00000129657.16	chr17	SEC14L1	1.35781	7.60695	12.3072	1.80828e-27	6.2763e-25	51.5973
ENSG00000163376.11	chr3	KBTBD8	-1.60912	5.16248	-12.245	2.91548e-27	9.94771e-25	51.1732
ENSG00000183091.19	chr2	NEB	4.0658	4.27456	12.2303	3.26379e-27	1.09506e-24	51.096
ENSG00000079691.18	chr6	CARMIL1	1.71604	5.55807	12.2173	3.60436e-27	1.1895e-24	50.9374
ENSG00000139641.12	chr12	ESYT1	-1.1826	7.23226	-12.1148	7.90502e-27	2.52597e-24	50.1339
ENSG00000205763.13	chr7	RP9P	-2.84171	0.215365	-12.1406	6.48711e-27	2.10632e-24	50.1245
ENSG00000259319.1	chr14	AF111167.2	1.20736	3.35276	12.0472	1.32517e-26	4.16828e-24	49.7349
ENSG00000112293.15	chr6	GPLD1	1.44285	3.12142	12.0037	1.84834e-26	5.63772e-24	49.4101
ENSG00000278535.5	chr17	DHRS11	1.13243	1.40382	11.9873	2.09495e-26	6.29454e-24	49.207
ENSG00000136014.12	chr12	USP44	-4.09938	0.165547	-12.0101	1.7592e-26	5.44838e-24	49.1372
ENSG00000005059.16	chr4	MCUB	-1.07379	5.66796	-11.969	2.40741e-26	7.12699e-24	49.0542
ENSG00000171843.16	chr9	MLLT3	3.1145	4.05373	11.95	2.78318e-26	7.99199e-24	48.9775
ENSG00000167483.18	chr19	FAM129C	-1.93401	8.35082	-11.9597	2.58617e-26	7.54526e-24	48.9592
ENSG00000110315.7	chr11	RNF141	-1.01406	5.98384	-11.9263	3.3359e-26	9.32708e-24	48.7201
ENSG00000138821.13	chr4	SLC39A8	1.62762	4.81817	11.905	3.92354e-26	1.06736e-23	48.6049
ENSG00000250337.6	chr5	PURPL	4.94743	-2.13977	11.9484	2.81869e-26	7.99199e-24	48.1861
ENSG00000254163.1	chr5	AC025434.1	4.50323	-1.12061	11.8819	4.67912e-26	1.25594e-23	48.0499
ENSG00000225742.5	chr3	LINC02036	4.2246	-2.10876	11.9186	3.53789e-26	9.75633e-24	47.9454
ENSG00000167775.11	chr19	CD320	1.20604	4.38191	11.7915	9.30281e-26	2.43214e-23	47.7624
ENSG00000204681.11	chr6	GABBR1	-3.66068	2.81727	-11.7814	1.00493e-25	2.56078e-23	47.7387
ENSG00000026652.14	chr6	AGPAT4	-2.27196	1.11896	-11.7927	9.22103e-26	2.43214e-23	47.7086
ENSG00000148154.10	chr9	UGCG	-2.00424	6.02738	-11.7843	9.82676e-26	2.53619e-23	47.6588
ENSG00000131378.14	chr3	RFTN1	-2.03408	4.83497	-11.7702	1.09371e-25	2.7224e-23	47.6063
ENSG00000205683.11	chr14	DPF3	-2.39337	1.38399	-11.77	1.0954e-25	2.7224e-23	47.5666
ENSG00000123836.15	chr1	PFKFB2	-1.72581	3.7244	-11.7206	1.59439e-25	3.86706e-23	47.274
ENSG00000143110.11	chr1	C1orf162	-2.02196	5.12641	-11.7238	1.55637e-25	3.82088e-23	47.2395
ENSG00000150995.19	chr3	ITPR1	-1.29523	6.37802	-11.7017	1.84027e-25	4.4103e-23	47.0194
ENSG00000131398.13	chr19	KCNC3	-2.68011	3.12436	-11.6367	3.01167e-25	7.04976e-23	46.6602
ENSG00000140968.11	chr16	IRF8	-1.92891	8.04225	-11.6418	2.8981e-25	6.86373e-23	46.5613
ENSG00000010278.14	chr12	CD9	3.10889	6.4252	11.6195	3.42947e-25	7.93548e-23	46.4123
ENSG00000160113.5	chr19	NR2F6	1.25713	2.8181	11.5813	4.58078e-25	1.04791e-22	46.2469
ENSG00000196664.5	chrX	TLR7	-2.6295	3.18753	-11.5669	5.10501e-25	1.15471e-22	46.1397
ENSG00000162144.9	chr11	CYB561A3	-1.43203	7.92411	-11.5627	5.26991e-25	1.17876e-22	45.9668
ENSG00000164136.17	chr4	IL15	2.0091	2.74457	11.5407	6.22475e-25	1.36207e-22	45.9443
ENSG00000181744.8	chr3	DIPK2A	-1.03994	4.68489	-11.5324	6.62829e-25	1.43478e-22	45.8121
ENSG00000178922.16	chr1	HYI	1.13137	4.32489	11.4926	8.95138e-25	1.89685e-22	45.5225
ENSG00000153814.13	chr7	JAZF1	-1.19314	5.149	-11.4964	8.69456e-25	1.86202e-22	45.5192
ENSG00000253686.1	chr5	LINC01484	2.99832	0.825547	11.4848	9.49006e-25	1.99005e-22	45.4436
ENSG00000135426.16	chr12	TESPA1	-1.29837	4.25887	-11.4616	1.13041e-24	2.34601e-22	45.3095
ENSG00000183624.14	chr3	HMCES	1.57412	6.22376	11.4487	1.24614e-24	2.55981e-22	45.1252
ENSG00000242265.5	chr7	PEG10	-3.24236	3.49754	-11.3616	2.40181e-24	4.78721e-22	44.6079
ENSG00000134508.12	chr18	CABLES1	3.12384	3.38306	11.3501	2.61808e-24	5.16712e-22	44.5087
ENSG00000019549.12	chr8	SNAI2	5.1126	-0.321698	11.2634	5.01943e-24	9.73965e-22	43.7243
ENSG00000185404.16	chr2	SP140L	-0.847769	5.72415	-11.2245	6.71867e-24	1.28813e-21	43.4654
ENSG00000177112.7	chr11	MRVI1-AS1	-2.77931	-1.52993	-11.2631	5.03166e-24	9.73965e-22	43.2414
ENSG00000166401.14	chr18	SERPINB8	-1.25538	4.27849	-11.1549	1.13195e-23	2.12965e-21	43.0316
ENSG00000186469.8	chr14	GNG2	-1.17904	6.5519	-11.1495	1.17829e-23	2.19632e-21	42.8927
ENSG00000157500.12	chr3	APPL1	-0.886491	6.41699	-11.0561	2.36594e-23	4.36962e-21	42.201
ENSG00000100599.16	chr14	RIN3	-1.9316	6.33158	-11.0279	2.92101e-23	5.34572e-21	42.0037
ENSG00000131781.13	chr1	FMO5	-1.43148	2.25577	-10.9838	4.05433e-23	7.28729e-21	41.83
ENSG00000152804.11	chr10	HHEX	-0.976979	6.10065	-11.0037	3.49756e-23	6.34319e-21	41.8217
ENSG00000224137.1	chr2	LINC01857	-2.83364	2.91591	-10.9549	5.0271e-23	8.87724e-21	41.6188
ENSG00000175857.8	chr5	GAPT	-2.53876	4.94209	-10.9568	4.95578e-23	8.82874e-21	41.5518
ENSG00000168056.15	chr11	LTBP3	0.933333	5.72187	10.9506	5.19301e-23	9.09048e-21	41.434
ENSG00000137073.21	chr9	UBAP2	0.855655	5.21792	10.9184	6.5937e-23	1.13451e-20	41.2156
ENSG00000081803.16	chr7	CADPS2	4.34314	0.807813	10.8781	8.89358e-23	1.50451e-20	41.0304
ENSG00000177699.4	chr15	AC011944.1	3.21346	-0.466335	10.8982	7.66061e-23	1.30691e-20	41.0138
ENSG00000056736.10	chr3	IL17RB	3.13066	4.50055	10.8074	1.50137e-22	2.51868e-20	40.4578
ENSG00000100027.15	chr22	YPEL1	-1.22363	4.594	-10.792	1.68241e-22	2.79905e-20	40.3361
ENSG00000266389.1	chr17	AC002091.2	-2.11851	-0.200339	-10.7669	2.02567e-22	3.34252e-20	40.011
ENSG00000169129.15	chr10	AFAP1L2	-2.27097	1.27782	-10.7361	2.54297e-22	4.16199e-20	39.9827
ENSG00000271046.1	chr10	AL512631.1	2.04535	3.03661	10.7236	2.79026e-22	4.458e-20	39.9169
ENSG00000176658.17	chr17	MYO1D	1.1914	6.10274	10.7345	2.57377e-22	4.17844e-20	39.8393
ENSG00000120162.10	chr9	MOB3B	-2.30536	3.03169	-10.691	3.54867e-22	5.53786e-20	39.6927
ENSG00000236352.1	chr20	AC005220.1	2.6438	-0.855416	10.7128	3.02048e-22	4.78782e-20	39.5896
ENSG00000103021.9	chr16	CCDC113	-2.85017	-1.12467	-10.724	2.78126e-22	4.458e-20	39.5169
ENSG00000261889.1	chr16	AC108134.2	1.83643	-1.01339	10.7042	3.21998e-22	5.06417e-20	39.4895
ENSG00000167107.12	chr17	ACSF2	-0.884132	4.56888	-10.6655	4.28318e-22	6.48306e-20	39.4089
ENSG00000171105.14	chr19	INSR	1.83054	4.2032	10.6612	4.41834e-22	6.63773e-20	39.4055
ENSG00000233785.1	chrX	AC131011.1	2.84989	-0.265602	10.6695	4.1568e-22	6.38783e-20	39.3776
ENSG00000281852.1	chrX	LINC00891	2.22758	-0.523297	10.6751	3.98835e-22	6.17611e-20	39.3732
ENSG00000136717.15	chr2	BIN1	-1.79904	5.81237	-10.6672	4.22836e-22	6.44856e-20	39.3701
ENSG00000162746.14	chr1	FCRLB	2.0528	4.02568	10.635	5.3619e-22	7.87887e-20	39.2151
ENSG00000067141.17	chr15	NEO1	1.85211	3.54872	10.5576	9.46852e-22	1.35185e-19	38.685
ENSG00000233559.1	chr7	LINC00513	-3.48176	-2.87623	-10.6491	4.83052e-22	7.15023e-20	38.4006
ENSG00000108823.16	chr17	SGCA	-2.19841	-1.35028	-10.5707	8.59632e-22	1.23609e-19	38.3826
ENSG00000245466.1	chr14	AL357153.1	-2.91301	-3.16728	-10.6507	4.7749e-22	7.12026e-20	38.2286
ENSG00000226026.5	chr1	AC092802.1	-2.72855	-2.81002	-10.6184	6.05501e-22	8.83285e-20	38.1955
ENSG00000168772.11	chr4	CXXC4	5.08458	-1.15561	10.4987	1.45799e-21	2.06695e-19	38.0708
ENSG00000182957.16	chr13	SPATA13	-1.78887	4.23305	-10.46	1.93559e-21	2.70593e-19	37.9573
ENSG00000100342.20	chr22	APOL1	1.55611	5.41716	10.4618	1.90987e-21	2.68865e-19	37.8761
ENSG00000234840.1	chr9	LINC01239	4.76777	-3.79745	10.5917	7.37103e-22	1.06753e-19	37.8576
ENSG00000124074.12	chr16	ENKD1	0.863163	2.96592	10.4085	2.82019e-21	3.88857e-19	37.6447
ENSG00000176105.14	chr18	YES1	2.69995	1.07334	10.405	2.8928e-21	3.96157e-19	37.6208
ENSG00000176749.9	chr17	CDK5R1	-2.34242	2.70056	-10.3848	3.35216e-21	4.49882e-19	37.4907
ENSG00000163029.16	chr2	SMC6	-1.04176	6.38523	-10.3987	3.03066e-21	4.12231e-19	37.3945
ENSG00000136156.14	chr13	ITM2B	0.93958	9.20127	10.386	3.32388e-21	4.49081e-19	37.3003
ENSG00000133805.15	chr11	AMPD3	-0.925329	5.41427	-10.3765	3.56277e-21	4.74981e-19	37.2636
ENSG00000130164.13	chr19	LDLR	2.50926	3.43003	10.3496	4.33329e-21	5.66451e-19	37.1944
ENSG00000115687.13	chr2	PASK	-0.977359	4.9572	-10.3593	4.03918e-21	5.31456e-19	37.1648
ENSG00000102445.18	chr13	RUBCNL	-2.05025	7.02852	-10.3636	3.91357e-21	5.18317e-19	37.14
ENSG00000259953.1	chr9	AL138756.1	-1.84672	1.07812	-10.2952	6.44014e-21	8.20548e-19	36.8172
ENSG00000183150.8	chr12	GPR19	1.33053	-0.267695	10.2996	6.237e-21	7.99726e-19	36.7383
ENSG00000040933.15	chr2	INPP4A	1.09111	6.00282	10.3011	6.16955e-21	7.96149e-19	36.6946
ENSG00000137094.14	chr9	DNAJB5	1.20497	1.70682	10.2525	8.78231e-21	1.11193e-18	36.5453
ENSG00000286061.1	chr1	RCAN3AS	-2.60227	-2.33629	-10.3471	4.41491e-21	5.73397e-19	36.4943
ENSG00000170396.8	chr2	ZNF804A	1.48309	6.29477	10.2233	1.08576e-20	1.36609e-18	36.1325
ENSG00000162733.18	chr1	DDR2	1.98676	0.721806	10.1857	1.42519e-20	1.76015e-18	36.0327
ENSG00000163534.15	chr1	FCRL1	-1.74729	7.30481	-10.1518	1.82142e-20	2.2358e-18	35.6112
ENSG00000169241.19	chr1	SLC50A1	-0.87711	4.72977	-10.1238	2.23121e-20	2.70582e-18	35.4893
ENSG00000123352.17	chr12	SPATS2	0.916569	5.44598	10.1307	2.1224e-20	2.58945e-18	35.4888
ENSG00000166736.11	chr11	HTR3A	-3.8343	0.314138	-10.1109	2.44855e-20	2.93403e-18	35.4498
ENSG00000138764.15	chr4	CCNG2	-1.01174	6.26503	-10.1214	2.27046e-20	2.73693e-18	35.4026
ENSG00000110395.6	chr11	CBL	-0.811797	6.36817	-10.1078	2.5047e-20	2.98356e-18	35.3019
ENSG00000212864.3	chr9	RNF208	1.66194	0.824167	10.0786	3.09223e-20	3.57756e-18	35.2857
ENSG00000230006.7	chr2	ANKRD36BP2	2.74888	4.90049	10.0948	2.74981e-20	3.25626e-18	35.2746
ENSG00000265975.1	chr17	AC002091.1	-2.08177	0.076337	-10.0902	2.84361e-20	3.3454e-18	35.2716
ENSG00000158887.16	chr1	MPZ	1.06744	1.12024	10.0678	3.34166e-20	3.80062e-18	35.2213
ENSG00000198832.10	chr22	SELENOM	1.15116	5.42878	10.0895	2.85832e-20	3.3454e-18	35.196
ENSG00000104324.16	chr8	CPQ	0.993555	4.6483	10.0759	3.15322e-20	3.62728e-18	35.1448
ENSG00000169891.18	chrX	REPS2	-1.30682	1.65563	-10.0519	3.747e-20	4.14455e-18	35.1214
ENSG00000070214.16	chr9	SLC44A1	1.2243	6.69332	10.0737	3.20245e-20	3.66298e-18	35.0531
ENSG00000182158.15	chr7	CREB3L2	0.947826	7.11215	10.0662	3.37966e-20	3.82224e-18	34.996
ENSG00000131401.11	chr19	NAPSB	-1.73397	7.5277	-10.0634	3.45014e-20	3.8586e-18	34.9799
ENSG00000136573.14	chr8	BLK	-1.56551	7.0401	-10.0525	3.73069e-20	4.14455e-18	34.9026
ENSG00000100219.16	chr22	XBP1	1.66298	8.81471	10.0466	3.89258e-20	4.28205e-18	34.8613
ENSG00000230489.1	chr1	VAV3-AS1	-2.7504	-2.305	-10.0637	3.44254e-20	3.8586e-18	34.577
ENSG00000163219.11	chr2	ARHGAP25	-0.920603	7.46045	-9.9977	5.53535e-20	6.0561e-18	34.5077
ENSG00000177426.20	chr18	TGIF1	-2.08208	4.9318	-9.96598	6.95205e-20	7.56496e-18	34.3803
ENSG00000073464.12	chrX	CLCN4	-2.19279	3.20131	-9.94155	8.28435e-20	8.9183e-18	34.3174
ENSG00000132359.15	chr17	RAP1GAP2	-1.37324	4.57891	-9.95371	7.59178e-20	8.21667e-18	34.2985
ENSG00000068024.16	chr2	HDAC4	1.21798	4.57657	9.93447	8.71568e-20	9.33273e-18	34.143
ENSG00000169398.19	chr8	PTK2	-2.32511	3.07771	-9.90981	1.04003e-19	1.10194e-17	34.0956
ENSG00000150961.15	chr4	SEC24D	0.941768	5.84847	9.93301	8.80751e-20	9.38117e-18	34.0676
ENSG00000144476.6	chr2	ACKR3	-2.37738	1.5478	-9.89973	1.11788e-19	1.17208e-17	34.0486
ENSG00000204475.10	chr6	NCR3	-2.52071	1.9007	-9.89003	1.19822e-19	1.24337e-17	33.9855
ENSG00000101493.11	chr18	ZNF516	-2.18447	2.93873	-9.88852	1.21126e-19	1.25e-17	33.956
ENSG00000116128.11	chr1	BCL9	0.950757	4.20142	9.89703	1.13971e-19	1.18878e-17	33.9057
ENSG00000103260.9	chr16	METRN	1.33306	2.53699	9.87938	1.2931e-19	1.31472e-17	33.8961
ENSG00000164951.16	chr8	PDP1	-0.876831	4.96072	-9.88786	1.21703e-19	1.25e-17	33.797
ENSG00000116717.13	chr1	GADD45A	1.61799	5.19701	9.88197	1.26938e-19	1.29716e-17	33.7343
ENSG00000114107.9	chr3	CEP70	0.858046	3.46545	9.85643	1.52372e-19	1.52607e-17	33.6814
ENSG00000150054.18	chr10	MPP7	-1.43369	2.26923	-9.84087	1.70284e-19	1.68866e-17	33.6372
ENSG00000148926.10	chr11	ADM	2.71846	2.38623	9.84168	1.69312e-19	1.68734e-17	33.631
ENSG00000133985.3	chr14	TTC9	-1.49015	5.04295	-9.86315	1.45224e-19	1.46175e-17	33.6292
ENSG00000008282.8	chr7	SYPL1	-0.883669	6.95916	-9.87341	1.34951e-19	1.36518e-17	33.6281
ENSG00000165591.6	chrX	FAAH2	1.73421	1.69913	9.80939	2.13182e-19	2.09345e-17	33.4212
ENSG00000246695.7	chr12	RASSF8-AS1	3.36949	-1.61663	9.82955	1.84628e-19	1.82194e-17	33.2909
ENSG00000112419.14	chr6	PHACTR2	-1.36367	2.80488	-9.79294	2.3972e-19	2.34129e-17	33.287
ENSG00000065923.10	chrX	SLC9A7	-1.1412	6.57886	-9.78857	2.47296e-19	2.39342e-17	33.0338
ENSG00000183486.13	chr21	MX2	-1.14633	5.82568	-9.76758	2.87181e-19	2.73992e-17	32.9053
ENSG00000064393.16	chr7	HIPK2	1.4025	6.35524	9.76107	3.00801e-19	2.85633e-17	32.8423
ENSG00000204677.11	chr5	FAM153C	-2.52974	-1.73692	-9.77145	2.79381e-19	2.69101e-17	32.7419
ENSG00000108641.15	chr17	B9D1	1.38452	1.9378	9.705	4.48121e-19	4.1572e-17	32.6922
ENSG00000138031.14	chr2	ADCY3	-1.08412	4.85914	-9.71291	4.2365e-19	4.00399e-17	32.5733
ENSG00000010810.17	chr6	FYN	-1.35896	4.99154	-9.70711	4.41443e-19	4.11421e-17	32.5438
ENSG00000141506.13	chr17	PIK3R5	-1.99263	5.28794	-9.70803	4.38575e-19	4.10649e-17	32.5342
ENSG00000177303.10	chr17	CASKIN2	1.61067	1.67847	9.67564	5.51926e-19	5.05037e-17	32.4894
ENSG00000114251.14	chr3	WNT5A	5.08124	-0.417762	9.67783	5.43395e-19	4.99502e-17	32.4382
ENSG00000105427.10	chr19	CNFN	-2.20445	-0.951479	-9.67371	5.59514e-19	5.09664e-17	32.2633
ENSG00000177380.14	chr19	PPFIA3	1.40894	1.70477	9.64287	6.96138e-19	6.22843e-17	32.2621
ENSG00000225422.4	chr12	RBMS1P1	-1.87836	-2.21724	-9.71222	4.25708e-19	4.00464e-17	32.2202
ENSG00000075420.13	chr3	FNDC3B	1.3087	5.01451	9.65766	6.26935e-19	5.65956e-17	32.1748
ENSG00000071575.11	chr2	TRIB2	-1.84168	4.85159	-9.64691	6.76522e-19	6.07994e-17	32.1271
ENSG00000115255.11	chr19	REEP6	1.33911	1.03265	9.60748	8.94238e-19	7.69312e-17	32.0084
ENSG00000179604.10	chr17	CDC42EP4	1.41573	2.82025	9.60936	8.824e-19	7.62386e-17	31.9935
ENSG00000185624.15	chr17	P4HB	0.934146	8.68587	9.6325	7.49187e-19	6.6734e-17	31.9334
ENSG00000189233.12	chr8	NUGGC	1.5768	4.84656	9.61889	8.2492e-19	7.22044e-17	31.9046
ENSG00000101213.7	chr20	PTK6	-1.93543	0.358464	-9.59692	9.63536e-19	8.21477e-17	31.8948
ENSG00000133121.21	chr13	STARD13	2.22082	-1.19228	9.60938	8.82281e-19	7.62386e-17	31.8449
ENSG00000171502.15	chr1	COL24A1	3.32217	-0.00978064	9.58896	1.01927e-18	8.55989e-17	31.8413
ENSG00000185477.5	chr4	GPRIN3	1.4847	6.65392	9.61888	8.24947e-19	7.22044e-17	31.8396
ENSG00000109654.15	chr4	TRIM2	-2.74184	1.89667	-9.57007	1.16471e-18	9.72894e-17	31.7577
ENSG00000249993.1	chr3	BFSP2-AS1	2.83351	-1.96499	9.61466	8.49969e-19	7.40724e-17	31.7358
ENSG00000166582.10	chr17	CENPV	-1.28592	2.50851	-9.56779	1.18359e-18	9.84579e-17	31.7307
ENSG00000147044.21	chrX	CASK	0.879319	5.9639	9.59307	9.90078e-19	8.37448e-17	31.6712
ENSG00000003249.13	chr16	DBNDD1	-2.51096	1.86234	-9.55712	1.27608e-18	1.05106e-16	31.669
ENSG00000111912.20	chr6	NCOA7	1.54489	6.06092	9.58879	1.0205e-18	8.55989e-17	31.6391
ENSG00000091137.12	chr7	SLC26A4	-2.39385	-3.17935	-9.66698	5.86837e-19	5.32145e-17	31.5875
ENSG00000167202.11	chr15	TBC1D2B	0.897167	5.08507	9.56069	1.24433e-18	1.03085e-16	31.4803
ENSG00000136048.14	chr12	DRAM1	1.28103	4.68668	9.55027	1.33923e-18	1.09594e-16	31.4369
ENSG00000143845.15	chr1	ETNK2	-2.62504	-1.07622	-9.55678	1.27916e-18	1.05106e-16	31.4198
ENSG00000159640.16	chr17	ACE	-3.35869	0.0420681	-9.51217	1.75158e-18	1.41044e-16	31.2895
ENSG00000123095.6	chr12	BHLHE41	1.24527	6.55248	9.53656	1.47511e-18	1.20224e-16	31.2652
ENSG00000272583.1	chr1	AL592494.2	-2.36897	-1.06109	-9.52493	1.60104e-18	1.29962e-16	31.2239
ENSG00000267534.4	chr19	S1PR2	2.74875	1.95025	9.4906	2.03862e-18	1.62855e-16	31.2012
ENSG00000131196.17	chr18	NFATC1	-1.27929	6.45696	-9.52218	1.63233e-18	1.3197e-16	31.171
ENSG00000282885.1	chr14	AL627171.2	-1.21048	-0.3161	-9.46741	2.39946e-18	1.89426e-16	30.9556
ENSG00000148248.14	chr9	SURF4	0.902847	5.10023	9.48495	2.12119e-18	1.68781e-16	30.9543
ENSG00000146540.15	chr7	C7orf50	1.05935	6.39427	9.49164	2.02377e-18	1.62313e-16	30.9531
ENSG00000253608.1	chr8	AC022915.2	3.03264	-1.47007	9.476	2.25881e-18	1.79024e-16	30.9019
ENSG00000158406.4	chr6	HIST1H4H	1.62102	2.91716	9.42101	3.32255e-18	2.59249e-16	30.6781
ENSG00000073849.15	chr3	ST6GAL1	0.938451	9.53871	9.4448	2.81205e-18	2.21131e-16	30.6321
ENSG00000169413.3	chr14	RNASE6	-1.64266	4.66135	-9.41811	3.39084e-18	2.63556e-16	30.5481
ENSG00000119227.8	chr3	PIGZ	1.58282	1.36057	9.37942	4.44575e-18	3.40294e-16	30.4481
ENSG00000065308.5	chr6	TRAM2	1.01375	6.81457	9.40867	3.62276e-18	2.79425e-16	30.3722
ENSG00000159708.18	chr16	LRRC36	-3.97851	-2.61364	-9.4387	2.935e-18	2.29901e-16	30.2959
ENSG00000251513.2	chr5	LIX1-AS1	-3.88405	-0.956351	-9.36474	4.926e-18	3.75626e-16	30.1602
ENSG00000260228.5	chr16	AC009119.1	-2.55345	-1.16615	-9.35814	5.1588e-18	3.91894e-16	30.0883
ENSG00000153898.13	chr1	MCOLN2	-1.75864	3.66361	-9.33334	6.13417e-18	4.62498e-16	30.0357
ENSG00000117407.17	chr1	ARTN	2.10997	-1.07753	9.31605	6.92009e-18	5.19807e-16	29.8704
ENSG00000188760.10	chr2	TMEM198	1.99328	0.512192	9.29569	7.97522e-18	5.94626e-16	29.8601
ENSG00000127990.17	chr7	SGCE	-2.94079	1.57681	-9.28282	8.72301e-18	6.45599e-16	29.7891
ENSG00000224557.7	chr6	HLA-DPB2	-3.04579	-2.23631	-9.34983	5.46693e-18	4.1374e-16	29.7792
ENSG00000166548.15	chr16	TK2	0.837681	3.80597	9.29635	7.93889e-18	5.94118e-16	29.7551
ENSG00000117322.17	chr1	CR2	-2.54704	4.53581	-9.28944	8.33004e-18	6.1879e-16	29.6833
ENSG00000124203.6	chr20	ZNF831	-2.17431	3.08649	-9.26418	9.93074e-18	7.24332e-16	29.6111
ENSG00000285554.1	chr1	AC242988.2	-1.6163	-0.362472	-9.25508	1.05793e-17	7.66083e-16	29.5106
ENSG00000204386.10	chr6	NEU1	1.03068	4.57101	9.26986	9.54653e-18	7.01391e-16	29.5058
ENSG00000065989.16	chr19	AC011529.1	1.3249	4.49531	9.26461	9.9014e-18	7.24332e-16	29.4734
ENSG00000149577.15	chr11	SIDT2	-0.802246	6.67669	-9.2704	9.51055e-18	7.01307e-16	29.4204
ENSG00000196535.16	chr17	MYO18A	-0.96506	6.5688	-9.25956	1.02549e-17	7.45277e-16	29.349
ENSG00000101210.12	chr20	EEF1A2	-3.14019	-0.5432	-9.22282	1.32372e-17	9.41618e-16	29.2587
ENSG00000233058.1	chr3	LINC00884	1.06596	0.321029	9.20496	1.49823e-17	1.0509e-15	29.2352
ENSG00000117143.13	chr1	UAP1	1.19452	5.5816	9.22424	1.31073e-17	9.35708e-16	29.1314
ENSG00000103876.12	chr15	FAH	0.879033	2.22044	9.18237	1.75217e-17	1.21631e-15	29.0918
ENSG00000107779.13	chr10	BMPR1A	-1.94994	1.4775	-9.17959	1.78621e-17	1.23144e-15	29.0888
ENSG00000123094.15	chr12	RASSF8	2.95356	0.15821	9.18148	1.76305e-17	1.21965e-15	29.0837
ENSG00000135916.16	chr2	ITM2C	1.13124	9.19631	9.21327	1.41436e-17	9.99038e-16	29.0319
ENSG00000016391.11	chr3	CHDH	2.26883	5.25903	9.20047	1.54564e-17	1.08039e-15	28.9957
ENSG00000111913.18	chr6	RIPOR2	-1.44563	8.40674	-9.2084	1.46299e-17	1.02977e-15	28.9929
ENSG00000101746.15	chr18	NOL4	6.26719	-2.98633	9.21886	1.36058e-17	9.64433e-16	28.9393
ENSG00000183960.9	chr3	KCNH8	-3.20741	0.34695	-9.13193	2.48377e-17	1.70651e-15	28.7349
ENSG00000137270.11	chr6	GCM1	-2.83909	-2.41703	-9.18601	1.70851e-17	1.19011e-15	28.6665
ENSG00000180596.7	chr6	HIST1H2BC	1.91865	1.65165	9.1071	2.94808e-17	1.99824e-15	28.595
ENSG00000108932.12	chr17	SLC16A6	1.72816	3.95841	9.10659	2.95854e-17	1.9986e-15	28.4447
ENSG00000164105.4	chr4	SAP30	1.07149	2.51351	9.07921	3.57314e-17	2.3977e-15	28.3725
ENSG00000198876.13	chr9	DCAF12	1.7352	5.83326	9.10843	2.92124e-17	1.98674e-15	28.3372
ENSG00000070882.13	chr7	OSBPL3	1.0964	6.55819	9.11146	2.86068e-17	1.95214e-15	28.3331
ENSG00000231789.2	chr1	PIK3CD-AS2	1.3533	1.5527	9.06088	4.05381e-17	2.67565e-15	28.2867
ENSG00000264522.6	chr1	OTUD7B	1.16129	2.65466	9.06098	4.05088e-17	2.67565e-15	28.2407
ENSG00000050438.17	chr12	SLC4A8	-1.4035	2.52279	-9.0528	4.28544e-17	2.81011e-15	28.2049
ENSG00000275714.1	chr6	HIST1H3A	1.75558	-0.646913	9.05359	4.26221e-17	2.80401e-15	28.1611
ENSG00000256633.1	chr11	AP005019.1	-2.16155	-0.166806	-9.04094	4.64963e-17	3.03902e-15	28.0964
ENSG00000057657.17	chr6	PRDM1	1.6926	6.2853	9.07554	3.66449e-17	2.45083e-15	28.0956
ENSG00000143669.13	chr1	LYST	-1.30164	7.11416	-9.07053	3.79333e-17	2.52859e-15	28.0513
ENSG00000173334.4	chr8	TRIB1	1.48823	7.37597	9.06561	3.9238e-17	2.60693e-15	28.0161
ENSG00000182749.5	chr1	PAQR7	1.05754	3.32995	9.032	4.94433e-17	3.22118e-15	27.9921
ENSG00000134716.11	chr1	CYP2J2	-2.68474	-2.47147	-9.08638	3.40087e-17	2.28973e-15	27.9879
ENSG00000106868.16	chr9	SUSD1	-1.17376	3.4497	-8.98771	6.70078e-17	4.3235e-15	27.702
ENSG00000149212.11	chr11	SESN3	-1.89255	6.73567	-9.01419	5.58791e-17	3.62872e-15	27.6824
ENSG00000214999.3	chr17	AC129492.2	-2.35575	-0.219865	-8.91996	1.06535e-16	6.72307e-15	27.2933
ENSG00000168461.13	chr18	RAB31	-1.751	5.2957	-8.94309	9.09524e-17	5.78886e-15	27.2703
ENSG00000173662.21	chr1	TAS1R1	3.57154	0.519422	8.9052	1.17829e-16	7.41256e-15	27.2451
ENSG00000258810.1	chr14	AL133371.2	-2.30961	-0.116426	-8.9038	1.18958e-16	7.46024e-15	27.189
ENSG00000141956.13	chr21	PRDM15	1.77552	5.62167	8.92061	1.06064e-16	6.71436e-15	27.0659
ENSG00000140263.14	chr15	SORD	-1.03122	3.40677	-8.87813	1.4172e-16	8.80544e-15	26.9662
ENSG00000187323.12	chr18	DCC	3.44867	-1.29181	8.86707	1.52802e-16	9.43577e-15	26.8703
ENSG00000138964.17	chr22	PARVG	-0.814055	7.32814	-8.89579	1.25641e-16	7.85488e-15	26.8654
ENSG00000258940.2	chr14	AL132639.2	1.05298	-0.0493686	8.844	1.78791e-16	1.10068e-14	26.812
ENSG00000113742.13	chr5	CPEB4	1.35443	6.87254	8.88408	1.36088e-16	8.48169e-15	26.7897
ENSG00000107404.20	chr1	DVL1	0.890433	6.06427	8.87249	1.47269e-16	9.1221e-15	26.7227
ENSG00000198794.12	chr15	SCAMP5	2.1087	3.21401	8.82726	2.00333e-16	1.22209e-14	26.6236
ENSG00000145287.10	chr4	PLAC8	-1.37084	6.18602	-8.84099	1.82479e-16	1.11996e-14	26.515
ENSG00000102001.12	chrX	CACNA1F	-1.99436	0.699823	-8.78004	2.76007e-16	1.64387e-14	26.412
ENSG00000233822.4	chr6	HIST1H2BN	1.35883	1.0991	8.77826	2.7935e-16	1.64915e-14	26.4053
ENSG00000101096.20	chr20	NFATC2	-1.08079	5.712	-8.82033	2.09997e-16	1.27717e-14	26.3941
ENSG00000161929.15	chr17	SCIMP	-1.92737	5.78188	-8.8182	2.13059e-16	1.29189e-14	26.3874
ENSG00000140948.11	chr16	ZCCHC14	1.38918	4.02741	8.80021	2.40734e-16	1.44663e-14	26.3694
ENSG00000142347.17	chr19	MYO1F	-1.38942	6.13364	-8.81383	2.19476e-16	1.32283e-14	26.3592
ENSG00000265263.1	chr17	AC124066.1	1.22491	-0.619966	8.77127	2.92908e-16	1.72413e-14	26.2989
ENSG00000149054.16	chr11	ZNF215	1.70143	3.36461	8.77901	2.77935e-16	1.64915e-14	26.291
ENSG00000189227.6	chr15	C15orf61	0.851443	2.72423	8.74644	3.46526e-16	2.02788e-14	26.1345
ENSG00000121895.8	chr4	TMEM156	0.908206	5.71202	8.78095	2.74315e-16	1.63864e-14	26.1186
ENSG00000105854.13	chr7	PON2	1.40958	2.20756	8.72009	4.14061e-16	2.38213e-14	25.9843
ENSG00000137747.16	chr11	TMPRSS13	-1.31247	1.33187	-8.69904	4.77291e-16	2.71422e-14	25.8827
ENSG00000133106.14	chr13	EPSTI1	-0.984953	4.93337	-8.72657	3.96331e-16	2.29929e-14	25.8086
ENSG00000118432.12	chr6	CNR1	1.84884	4.80686	8.7175	4.21369e-16	2.40983e-14	25.751
ENSG00000142694.6	chr1	EVA1B	1.94549	2.71273	8.66409	6.04042e-16	3.39664e-14	25.5794
ENSG00000050820.17	chr16	BCAR1	2.90357	-1.90075	8.66883	5.85039e-16	3.299e-14	25.5069
ENSG00000223336.1	chr13	RNU2-6P	-2.33323	-1.30655	-8.66103	6.1661e-16	3.45765e-14	25.4838
ENSG00000240219.1	chr1	AL512306.2	-2.15045	0.942986	-8.62167	8.03383e-16	4.41882e-14	25.3756
ENSG00000196517.11	chr1	SLC6A9	1.46932	2.65631	8.63092	7.54997e-16	4.1755e-14	25.3713
ENSG00000150625.16	chr4	GPM6A	-3.90667	1.34139	-8.62071	8.08572e-16	4.43525e-14	25.3681
ENSG00000274134.1	chr16	MIR6774	-2.34567	-1.61541	-8.6324	7.47535e-16	4.14563e-14	25.2515
ENSG00000137642.13	chr11	SORL1	-1.59627	6.12052	-8.63777	7.21036e-16	4.00972e-14	25.1904
ENSG00000100290.3	chr22	BIK	2.02399	2.2402	8.60027	9.27453e-16	5.03249e-14	25.1874
ENSG00000173898.13	chr11	SPTBN2	1.7229	3.76207	8.61151	8.60105e-16	4.69235e-14	25.1383
ENSG00000139116.18	chr12	KIF21A	1.84446	1.95226	8.58271	1.04326e-15	5.6005e-14	25.0913
ENSG00000079337.16	chr12	RAPGEF3	1.54824	4.06181	8.60737	8.8433e-16	4.81147e-14	25.0792
ENSG00000257551.1	chr1	HLX-AS1	1.26841	-0.312798	8.57683	1.08522e-15	5.79483e-14	25.0532
ENSG00000112182.15	chr6	BACH2	-1.79716	6.66704	-8.61727	8.27472e-16	4.52659e-14	25.0193
ENSG00000198883.12	chrX	PNMA5	-3.42509	-1.77465	-8.58507	1.02692e-15	5.5275e-14	24.9076
ENSG00000125648.15	chr19	SLC25A23	0.82175	5.37687	8.59633	9.52243e-16	5.15312e-14	24.9053
ENSG00000256894.1	chr12	AC022509.3	1.06004	0.970794	8.54405	1.35133e-15	7.17773e-14	24.8696
ENSG00000179583.19	chr16	CIITA	-1.24973	8.39078	-8.59462	9.63273e-16	5.19883e-14	24.8566
ENSG00000173890.17	chr3	GPR160	1.21941	5.84606	8.58153	1.05154e-15	5.62996e-14	24.7899
ENSG00000140939.14	chr16	AC074143.1	1.55056	0.829998	8.52315	1.55375e-15	8.08231e-14	24.734
ENSG00000130035.7	chr12	GALNT8	-2.58884	-1.44641	-8.53581	1.42782e-15	7.56406e-14	24.6606
ENSG00000261416.1	chr16	AC012645.3	0.930719	2.99181	8.52567	1.52778e-15	7.98849e-14	24.649
ENSG00000259674.1	chr15	AC092868.1	-3.79075	1.48059	-8.50365	1.76965e-15	9.11122e-14	24.6002
ENSG00000198825.13	chr10	INPP5F	-1.12679	4.2737	-8.53172	1.46734e-15	7.73275e-14	24.577
ENSG00000025039.14	chr6	RRAGD	1.17915	3.84476	8.51746	1.61386e-15	8.35181e-14	24.5191
ENSG00000084207.16	chr11	GSTP1	0.916995	7.45405	8.53504	1.43516e-15	7.583e-14	24.4602
ENSG00000185585.20	chr9	OLFML2A	-1.85686	-0.256142	-8.48118	2.05535e-15	1.0475e-13	24.425
ENSG00000124570.19	chr6	SERPINB6	-1.10548	3.79139	-8.4976	1.84247e-15	9.43787e-14	24.4119
ENSG00000284825.1	chr6	AL121935.1	-1.9438	0.140471	-8.4747	2.146e-15	1.08819e-13	24.4054
ENSG00000163686.14	chr3	ABHD6	-1.35046	1.87269	-8.47104	2.19894e-15	1.11223e-13	24.3781
ENSG00000197903.7	chr6	HIST1H2BK	1.19914	5.69288	8.49981	1.81554e-15	9.32362e-14	24.2557
ENSG00000119862.13	chr2	LGALSL	1.23465	2.23318	8.4485	2.55434e-15	1.27281e-13	24.2083
ENSG00000226397.8	chr12	C12orf77	1.78139	-1.10202	8.45337	2.47305e-15	1.23843e-13	24.2047
ENSG00000214900.9	chr14	LINC01588	-1.27162	3.29082	-8.45779	2.40145e-15	1.20859e-13	24.1887
ENSG00000132481.7	chr17	AC087289.1	1.06853	2.57285	8.44688	2.58206e-15	1.28028e-13	24.1682
ENSG00000128833.13	chr15	MYO5C	-1.6236	2.87859	-8.4379	2.74068e-15	1.35512e-13	24.1054
ENSG00000223725.6	chr2	AC009226.1	-1.19061	-0.0880266	-8.42714	2.94367e-15	1.43138e-13	24.0913
ENSG00000167037.18	chr22	SGSM1	-3.53131	1.63117	-8.4099	3.30031e-15	1.59708e-13	23.99
ENSG00000102755.12	chr13	FLT1	-2.22078	0.412994	-8.39628	3.61188e-15	1.73534e-13	23.9077
ENSG00000050405.13	chr12	LIMA1	-2.34021	2.39024	-8.3951	3.64029e-15	1.74482e-13	23.8579
ENSG00000114450.10	chr3	GNB4	-1.28556	4.29666	-8.41692	3.15008e-15	1.52805e-13	23.8491
ENSG00000157303.11	chr9	SUSD3	0.864775	5.45286	8.43416	2.80969e-15	1.38293e-13	23.8335
ENSG00000185650.9	chr14	ZFP36L1	-0.875651	8.41607	-8.43249	2.84097e-15	1.39492e-13	23.789
ENSG00000222030.1	chr2	LINC01793	3.52253	-4.38531	8.47497	2.14217e-15	1.08819e-13	23.7593
ENSG00000136161.12	chr13	RCBTB2	1.08933	4.30007	8.40736	3.35631e-15	1.62029e-13	23.7543
ENSG00000224875.2	chr2	AC083949.1	-1.37124	1.67031	-8.36906	4.32461e-15	2.04363e-13	23.7222
ENSG00000249988.1	chr4	AC092546.1	2.47937	-1.49545	8.37039	4.28686e-15	2.03056e-13	23.6496
ENSG00000261801.5	chr15	LOXL1-AS1	-2.04579	-0.953472	-8.36514	4.4383e-15	2.09244e-13	23.6272
ENSG00000283125.1	chr18	AC022726.2	2.26487	-2.99575	8.38701	3.84062e-15	1.83212e-13	23.5069
ENSG00000277851.1	chr12	LINC02391	0.974794	0.0703583	8.32362	5.8378e-15	2.68926e-13	23.4394
ENSG00000228590.2	chr2	AC007381.1	-1.83137	3.07462	-8.32942	5.61871e-15	2.61224e-13	23.3814
ENSG00000183317.17	chr1	EPHA10	-3.48964	-2.34811	-8.3554	4.73346e-15	2.22119e-13	23.3731
ENSG00000269954.2	chr8	AC022239.1	-2.26334	-2.53312	-8.35683	4.68887e-15	2.20541e-13	23.3558
ENSG00000146285.14	chr6	SCML4	-1.7251	1.71547	-8.29964	6.83653e-15	3.10669e-13	23.275
ENSG00000168280.17	chr2	KIF5C	-1.81648	0.104882	-8.29841	6.89242e-15	3.12503e-13	23.2736
ENSG00000168297.15	chr3	PXK	-0.906328	6.33681	-8.34914	4.93294e-15	2.30268e-13	23.2545
ENSG00000181619.11	chr14	GPR135	1.16409	1.51835	8.29184	7.19647e-15	3.24777e-13	23.2275
ENSG00000206417.8	chr3	H1FX-AS1	1.33496	2.98856	8.30603	6.55482e-15	2.99898e-13	23.2231
ENSG00000084764.11	chr2	MAPRE3	0.885153	2.5213	8.29572	7.01548e-15	3.17368e-13	23.1949
ENSG00000115919.15	chr2	KYNU	-1.14388	4.4526	-8.32201	5.90001e-15	2.71172e-13	23.1914
ENSG00000227403.1	chr2	LINC01806	1.24026	2.68627	8.29153	7.21154e-15	3.24777e-13	23.1539
ENSG00000044574.8	chr9	HSPA5	1.07413	9.31562	8.32866	5.64687e-15	2.61929e-13	23.1188
ENSG00000102003.10	chrX	SYP	1.04263	0.65499	8.2696	8.32967e-15	3.71806e-13	23.1009
ENSG00000250222.1	chr5	AC008443.5	0.937184	-0.687101	8.26464	8.60568e-15	3.83277e-13	23.034
ENSG00000273447.1	chr4	AC004067.1	-1.16722	-0.697216	-8.26193	8.76004e-15	3.8929e-13	23.006
ENSG00000204983.14	chr7	PRSS1	-3.04513	-3.85443	-8.35243	4.827e-15	2.25982e-13	22.9862
ENSG00000172508.10	chr11	CARNS1	1.37293	6.50258	8.30327	6.67534e-15	3.0472e-13	22.9517
ENSG00000261150.2	chr8	EPPK1	-2.35426	-2.12822	-8.28073	7.74206e-15	3.47892e-13	22.9444
ENSG00000268804.1	chr16	LINC02132	-1.9948	-0.787939	-8.23464	1.04773e-14	4.63558e-13	22.8206
ENSG00000224184.5	chr2	MIR3681HG	-3.07745	-2.43302	-8.2696	8.32962e-15	3.71806e-13	22.8197
ENSG00000090104.12	chr1	RGS1	2.44683	6.52585	8.27467	8.05685e-15	3.6123e-13	22.7741
ENSG00000121753.12	chr1	ADGRB2	2.13363	2.03444	8.226	1.10879e-14	4.87357e-13	22.7703
ENSG00000078900.15	chr1	TP73	2.06416	2.63333	8.225	1.11608e-14	4.88429e-13	22.7283
ENSG00000100228.12	chr22	RAB36	1.40888	3.09762	8.23041	1.07719e-14	4.75545e-13	22.7228
ENSG00000286118.1	chrX	AC234031.2	1.43425	-1.34345	8.21655	1.17951e-14	5.13955e-13	22.6863
ENSG00000185482.8	chr12	STAC3	-1.24536	2.78748	-8.21492	1.19224e-14	5.18378e-13	22.6707
ENSG00000259772.6	chr15	AC012236.1	2.20954	0.807556	8.18794	1.42224e-14	6.0964e-13	22.5788
ENSG00000074964.17	chr1	ARHGEF10L	-2.06853	1.90945	-8.18596	1.44076e-14	6.13189e-13	22.5423
ENSG00000174669.12	chr11	SLC29A2	-1.46667	2.31431	-8.18658	1.43493e-14	6.12308e-13	22.5181
ENSG00000274026.2	chr9	FAM27E3	2.22222	-2.98547	8.22561	1.11158e-14	4.87519e-13	22.4965
ENSG00000267395.5	chr19	DM1-AS	1.49499	-1.24036	8.16986	1.60049e-14	6.76879e-13	22.4018
ENSG00000105492.16	chr19	SIGLEC6	-2.58521	2.92755	-8.1676	1.62431e-14	6.85513e-13	22.3566
ENSG00000168843.14	chr4	FSTL5	3.27885	-3.79739	8.21102	1.22303e-14	5.3062e-13	22.2854
ENSG00000163596.16	chr2	ICA1L	-0.906237	2.21687	-8.14737	1.85328e-14	7.80512e-13	22.2774
ENSG00000178202.13	chr11	KDELC2	0.857819	4.34109	8.1712	1.58656e-14	6.72401e-13	22.214
ENSG00000143013.13	chr1	LMO4	0.892035	6.27812	8.18651	1.43564e-14	6.12308e-13	22.1984
ENSG00000170677.6	chr18	SOCS6	1.64064	2.24313	8.13533	2.00445e-14	8.35436e-13	22.18
ENSG00000229839.6	chr2	AC018462.1	2.08834	1.17571	8.12	2.21473e-14	9.13623e-13	22.1359
ENSG00000164050.13	chr3	PLXNB1	1.7439	2.65242	8.12768	2.10678e-14	8.72665e-13	22.0967
ENSG00000176014.12	chr18	TUBB6	-2.00332	4.13313	-8.14273	1.91021e-14	8.02499e-13	22.0848
ENSG00000117013.16	chr1	KCNQ4	1.70322	0.123257	8.1086	2.38513e-14	9.75915e-13	22.0779
ENSG00000124374.9	chr2	PAIP2B	1.10607	4.66415	8.14247	1.91346e-14	8.02499e-13	21.996
ENSG00000151914.20	chr6	DST	2.2159	2.49743	8.11012	2.36166e-14	9.70257e-13	21.9924
ENSG00000103066.13	chr16	PLA2G15	0.87725	4.07385	8.12812	2.10077e-14	8.71971e-13	21.9668
ENSG00000100368.14	chr22	CSF2RB	-1.21027	5.39373	-8.13201	2.04823e-14	8.5192e-13	21.906
ENSG00000244676.5	chr21	AL109761.1	2.16975	-2.44739	8.10908	2.37768e-14	9.74848e-13	21.8789
ENSG00000198417.7	chr16	MT1F	-1.78343	1.35572	-8.05428	3.39271e-14	1.36597e-12	21.7291
ENSG00000184014.8	chr11	DENND5A	-1.15306	5.54738	-8.10391	2.4589e-14	1.00203e-12	21.7131
ENSG00000158457.6	chr7	TSPAN33	-0.814152	6.56792	-8.10811	2.39271e-14	9.77031e-13	21.6945
ENSG00000280109.3	chr21	PLAC4	-2.77647	-3.84292	-8.13697	1.9832e-14	8.30017e-13	21.6808
ENSG00000061656.9	chr20	SPAG4	1.88026	3.28739	8.06612	3.14234e-14	1.27025e-12	21.6541
ENSG00000126243.8	chr19	LRFN3	1.81695	2.24404	8.04749	3.54517e-14	1.41884e-12	21.6229
ENSG00000170921.15	chr17	TANC2	-1.61935	1.58927	-8.0388	3.75026e-14	1.49498e-12	21.6212
ENSG00000054277.14	chr1	OPN3	-1.16515	4.44304	-8.07047	3.05484e-14	1.23986e-12	21.5759
ENSG00000134594.5	chrX	RAB33A	-1.48576	0.783229	-8.02646	4.06158e-14	1.60636e-12	21.5621
ENSG00000139197.10	chr12	PEX5	0.873978	5.58523	8.06986	3.06711e-14	1.24233e-12	21.4712
ENSG00000035664.11	chr15	DAPK2	-1.67547	2.13189	-8.01485	4.37804e-14	1.72137e-12	21.4437
ENSG00000259605.3	chr19	AC074212.1	1.67065	0.36379	8.00411	4.69222e-14	1.83773e-12	21.4229
ENSG00000152056.17	chr2	AP1S3	-1.13435	3.07054	-8.01741	4.30632e-14	1.69981e-12	21.382
ENSG00000158373.8	chr6	HIST1H2BD	1.21381	3.14126	8.00442	4.68299e-14	1.83769e-12	21.2718
ENSG00000136040.9	chr12	PLXNC1	0.83463	6.73335	8.0405	3.70927e-14	1.48157e-12	21.2571
ENSG00000245573.8	chr11	BDNF-AS	0.959167	0.571295	7.97635	5.61166e-14	2.1673e-12	21.2486
ENSG00000166444.19	chr11	ST5	-1.70018	-0.29614	-7.97264	5.74736e-14	2.20381e-12	21.2106
ENSG00000151651.16	chr10	ADAM8	-0.980081	6.80747	-8.03033	3.96135e-14	1.57601e-12	21.1933
ENSG00000139112.11	chr12	GABARAPL1	2.40943	3.89617	7.9992	4.84325e-14	1.89319e-12	21.1744
ENSG00000231527.6	chr9	FAM27C	2.02867	-1.98806	7.97393	5.69991e-14	2.19397e-12	21.1121
ENSG00000279778.1	chr1	AL445437.1	2.40064	-3.44305	7.99151	5.08943e-14	1.9779e-12	20.9884
ENSG00000187862.11	chr1	TTC24	-2.16128	0.867473	-7.92043	8.03881e-14	3.0419e-12	20.8984
ENSG00000112715.21	chr6	VEGFA	1.63719	4.40031	7.96407	6.07338e-14	2.31998e-12	20.8946
ENSG00000111664.10	chr12	GNB3	1.89701	4.10722	7.95989	6.23886e-14	2.37868e-12	20.8922
ENSG00000135749.19	chr1	PCNX2	-1.69463	3.07707	-7.93253	7.43795e-14	2.82516e-12	20.8534
ENSG00000084234.17	chr11	APLP2	-0.815292	7.42454	-7.97613	5.61985e-14	2.1673e-12	20.8533
ENSG00000167861.16	chr17	HID1	1.45588	4.16703	7.95256	6.53995e-14	2.48877e-12	20.8426
ENSG00000183579.15	chr22	ZNRF3	1.30799	1.53557	7.89964	9.18443e-14	3.43665e-12	20.7425
ENSG00000092607.15	chr1	TBX15	3.26497	0.00802872	7.8886	9.8573e-14	3.64105e-12	20.7033
ENSG00000184678.10	chr1	HIST2H2BE	1.19147	4.00744	7.91637	8.25074e-14	3.11624e-12	20.6272
ENSG00000058866.15	chr3	DGKG	-1.76857	1.78046	-7.87665	1.06403e-13	3.88748e-12	20.5938
ENSG00000137269.15	chr6	LRRC1	-1.1915	1.72349	-7.87408	1.08168e-13	3.93983e-12	20.5831
ENSG00000227855.3	chr7	DPY19L2P3	1.76006	-1.10084	7.8711	1.10244e-13	4.00601e-12	20.5594
ENSG00000225264.3	chr7	ZNRF2P2	1.79861	-0.782238	7.86621	1.13749e-13	4.11848e-12	20.5448
ENSG00000162545.6	chr1	CAMK2N1	2.94988	4.10896	7.90452	8.90169e-14	3.34953e-12	20.5446
ENSG00000260997.1	chr7	AC004847.1	-0.99676	2.81111	-7.87867	1.05035e-13	3.85148e-12	20.5345
ENSG00000279355.1	chr6	AGPAT4-IT1	-2.48641	-2.97072	-7.90388	8.93859e-14	3.35714e-12	20.4782
ENSG00000130702.15	chr20	LAMA5	-1.33029	5.61249	-7.90226	9.03173e-14	3.3858e-12	20.424
ENSG00000275638.1	chr15	AC011939.3	-1.01706	-0.437508	-7.84396	1.31105e-13	4.69623e-12	20.4147
ENSG00000145416.13	chr4	MARCH1	-1.34494	7.22447	-7.90632	8.79983e-14	3.31741e-12	20.4055
ENSG00000136630.13	chr1	HLX	1.16968	3.21623	7.86646	1.13568e-13	4.11848e-12	20.4042
ENSG00000123989.14	chr2	CHPF	1.61128	5.42271	7.89323	9.56923e-14	3.56078e-12	20.3697
ENSG00000073060.16	chr12	SCARB1	0.92899	4.54599	7.88077	1.03639e-13	3.80723e-12	20.3522
ENSG00000261468.1	chr3	AC096921.2	-0.810065	1.96509	-7.82447	1.48454e-13	5.25224e-12	20.2584
ENSG00000224220.1	chr2	AC104699.1	1.595	3.22548	7.84077	1.33804e-13	4.76746e-12	20.2383
ENSG00000279024.1	chr2	AC112255.1	2.13635	2.34843	7.8261	1.4692e-13	5.20711e-12	20.2154
ENSG00000172575.12	chr15	RASGRP1	1.03702	6.24448	7.87399	1.08227e-13	3.93983e-12	20.2099
ENSG00000244167.1	chr7	AC005532.2	-2.95603	-3.62243	-7.87726	1.05989e-13	3.8794e-12	20.1948
ENSG00000184232.9	chr11	OAF	1.09544	3.05627	7.8281	1.45055e-13	5.15009e-12	20.1793
ENSG00000230266.1	chr3	XXYLT1-AS2	1.6346	1.88036	7.81149	1.61237e-13	5.68452e-12	20.1712
ENSG00000227589.1	chr1	AL136528.1	1.48018	-1.65606	7.80888	1.63942e-13	5.75972e-12	20.1359
ENSG00000179331.3	chr11	RAB39A	-1.21852	0.661217	-7.78827	1.86893e-13	6.50924e-12	20.0823
ENSG00000177045.9	chr19	SIX5	1.05639	2.89921	7.80826	1.64586e-13	5.77227e-12	20.071
ENSG00000171680.21	chr1	PLEKHG5	1.51124	1.13032	7.78286	1.93435e-13	6.70229e-12	20.033
ENSG00000103528.17	chr16	SYT17	-2.70683	-1.38769	-7.78606	1.89536e-13	6.5899e-12	19.9977
ENSG00000140104.14	chr14	CLBA1	0.94033	1.30647	7.76856	2.11805e-13	7.28861e-12	19.9387
ENSG00000240710.1	chr1	AL512306.3	-2.1772	-0.423582	-7.76038	2.23082e-13	7.63753e-12	19.8992
ENSG00000261359.2	chr16	PYCARD-AS1	-1.09995	1.89854	-7.76512	2.16476e-13	7.43666e-12	19.8941
ENSG00000204262.13	chr2	COL5A2	1.13529	1.10701	7.75791	2.26611e-13	7.73204e-12	19.8813
ENSG00000002822.15	chr7	MAD1L1	-1.02119	1.78084	-7.7504	2.37654e-13	8.06781e-12	19.8129
ENSG00000166510.14	chr18	CCDC68	-2.68251	-1.27011	-7.75438	2.31727e-13	7.89321e-12	19.8085
ENSG00000143889.16	chr2	HNRNPLL	1.08818	3.70881	7.77505	2.03258e-13	7.0185e-12	19.7758
ENSG00000228784.8	chr2	LINC00954	-1.74097	1.03403	-7.73795	2.57144e-13	8.65647e-12	19.7649
ENSG00000243417.1	chr4	AC023424.2	1.15058	0.848211	7.73647	2.59557e-13	8.71111e-12	19.7567
ENSG00000278763.1	chr9	FAM27B	2.09522	-3.18433	7.77811	1.99349e-13	6.89536e-12	19.7423
ENSG00000263482.3	chr10	ANTXRLP1	-2.24884	-0.674899	-7.73643	2.59633e-13	8.71111e-12	19.7391
ENSG00000088340.16	chr20	FER1L4	2.59128	3.01134	7.75408	2.32166e-13	7.8948e-12	19.7105
ENSG00000154864.12	chr18	PIEZO2	3.7567	-0.0688634	7.70803	3.10691e-13	1.02701e-11	19.591
ENSG00000109501.13	chr4	WFS1	1.16736	4.01316	7.74979	2.38566e-13	8.08512e-12	19.5862
ENSG00000163577.8	chr3	EIF5A2	-1.30641	1.55886	-7.70143	3.23911e-13	1.06373e-11	19.5254
ENSG00000219438.8	chr22	FAM19A5	3.5531	-0.12335	7.69082	3.46327e-13	1.12218e-11	19.4867
ENSG00000163884.4	chr3	KLF15	2.22027	-0.612479	7.69064	3.46726e-13	1.12218e-11	19.4783
ENSG00000114850.6	chr3	SSR3	0.887311	7.09139	7.75855	2.25685e-13	7.71351e-12	19.4767
ENSG00000134245.18	chr1	WNT2B	-2.00574	-1.49608	-7.69855	3.29849e-13	1.08146e-11	19.4638
ENSG00000115902.11	chr2	SLC1A4	1.25022	5.83675	7.74265	2.4961e-13	8.43104e-12	19.4035
ENSG00000178078.11	chr19	STAP2	1.33107	-0.285387	7.67439	3.84121e-13	1.23329e-11	19.3836
ENSG00000123329.18	chr12	ARHGAP9	-0.850408	6.68942	-7.73436	2.63045e-13	8.81091e-12	19.3301
ENSG00000049449.9	chr11	RCN1	0.905038	2.53452	7.6777	3.76187e-13	1.20975e-11	19.2984
ENSG00000233834.6	chr7	AC005083.1	1.34005	1.23615	7.65574	4.31961e-13	1.36942e-11	19.2469
ENSG00000117090.15	chr1	SLAMF1	-1.65103	2.56513	-7.66461	4.08521e-13	1.30332e-11	19.225
ENSG00000120725.13	chr5	SIL1	0.957247	4.71766	7.69788	3.31242e-13	1.08251e-11	19.1942
ENSG00000159842.15	chr17	ABR	-0.803302	5.19124	-7.70257	3.21578e-13	1.05779e-11	19.1906
ENSG00000132535.19	chr17	DLG4	1.0817	3.4222	7.66775	4.00538e-13	1.27988e-11	19.141
ENSG00000196628.16	chr18	TCF4	-1.05341	8.52421	-7.70415	3.18392e-13	1.05075e-11	19.14
ENSG00000175906.5	chr17	ARL4D	-1.25226	1.1786	-7.63208	5.01227e-13	1.57413e-11	19.1126
ENSG00000118495.19	chr6	PLAGL1	-0.904544	3.45127	-7.65579	4.31822e-13	1.36942e-11	19.0826
ENSG00000244459.2	chr4	AC147067.1	-1.68101	-0.139683	-7.61913	5.43666e-13	1.69158e-11	19.0483
ENSG00000149972.11	chr11	CNTN5	3.08124	-4.46994	7.69572	3.35797e-13	1.09384e-11	19.0238
ENSG00000184897.6	chr3	H1FX	1.24662	8.86664	7.68435	3.60759e-13	1.16385e-11	19.0199
ENSG00000269821.1	chr11	KCNQ1OT1	1.50857	1.31058	7.6198	5.41381e-13	1.68708e-11	19.0184
ENSG00000268049.1	chr19	AC012313.2	-1.39774	0.130717	-7.60673	5.87595e-13	1.82263e-11	18.9755
ENSG00000235172.7	chr5	LINC01366	-2.09106	-2.45969	-7.62763	5.15431e-13	1.61622e-11	18.9119
ENSG00000276231.4	chr17	PIK3R6	-1.67487	0.972397	-7.59717	6.23877e-13	1.92332e-11	18.907
ENSG00000273837.1	chr19	AC018755.4	-2.66767	0.351297	-7.58362	6.79101e-13	2.08082e-11	18.8356
ENSG00000124721.17	chr6	DNAH8	-3.19675	0.270312	-7.58014	6.94041e-13	2.11632e-11	18.8146
ENSG00000185565.12	chr3	LSAMP	4.25993	-2.2988	7.5883	6.59484e-13	2.02688e-11	18.7854
ENSG00000176428.6	chr7	VPS37D	1.33396	0.518997	7.55201	8.27344e-13	2.48216e-11	18.6384
ENSG00000120324.8	chr5	PCDHB10	2.06602	-2.36173	7.56701	7.53377e-13	2.28752e-11	18.6147
ENSG00000141668.10	chr18	CBLN2	4.10852	-1.28945	7.54969	8.3939e-13	2.50884e-11	18.6141
ENSG00000170004.16	chr17	CHD3	-1.39127	5.55042	-7.60522	5.93176e-13	1.83429e-11	18.59
ENSG00000242258.1	chr7	LINC00996	1.55024	4.57855	7.59513	6.31889e-13	1.94504e-11	18.568
ENSG00000163995.20	chr4	ABLIM2	1.2494	1.19005	7.54224	8.79355e-13	2.61481e-11	18.5568
ENSG00000167815.12	chr19	PRDX2	0.996165	5.99277	7.60593	5.90545e-13	1.82896e-11	18.5493
ENSG00000251131.1	chr5	AC025171.3	0.806939	0.00748606	7.53031	9.47215e-13	2.7837e-11	18.5141
ENSG00000215895.4	chr1	AL354702.1	1.09052	0.821476	7.53097	9.43325e-13	2.77633e-11	18.5064
ENSG00000166147.13	chr15	FBN1	1.52699	1.48375	7.53546	9.17296e-13	2.7196e-11	18.5009
ENSG00000106080.10	chr7	FKBP14	0.822967	2.95846	7.55311	8.21686e-13	2.47255e-11	18.4927
ENSG00000181690.8	chr8	PLAG1	-1.61618	1.46888	-7.53156	9.39843e-13	2.77013e-11	18.4892
ENSG00000237172.4	chr16	B3GNT9	1.27103	2.14238	7.53471	9.21563e-13	2.72823e-11	18.4538
ENSG00000198178.10	chr12	CLEC4C	-3.0566	-1.35884	-7.52307	9.90885e-13	2.9078e-11	18.424
ENSG00000188277.9	chr15	C15orf62	1.3288	0.773254	7.51657	1.03179e-12	3.01029e-11	18.4188
ENSG00000137261.14	chr6	KIAA0319	-1.79469	0.108933	-7.51002	1.07472e-12	3.11297e-11	18.3922
ENSG00000283415.1	chr11	AC087280.2	1.92289	-1.64339	7.51596	1.03573e-12	3.01739e-11	18.3716
ENSG00000017427.16	chr12	IGF1	1.73487	3.1108	7.53355	9.2829e-13	2.74411e-11	18.352
ENSG00000063180.9	chr19	CA11	-0.821188	2.74086	-7.52163	9.99809e-13	2.92546e-11	18.3324
ENSG00000170801.10	chr4	HTRA3	3.12392	1.7498	7.50559	1.10474e-12	3.18619e-11	18.2871
ENSG00000112079.9	chr6	STK38	-0.908201	5.89302	-7.54958	8.39978e-13	2.50884e-11	18.2119
ENSG00000272182.1	chr3	AC135507.1	-0.985706	1.35904	-7.47845	1.3075e-12	3.6968e-11	18.1726
ENSG00000164849.10	chr7	GPR146	1.88156	2.06327	7.48653	1.24358e-12	3.54595e-11	18.1602
ENSG00000125740.14	chr19	FOSB	1.74792	7.91394	7.54482	8.65293e-13	2.58062e-11	18.1543
ENSG00000234572.1	chr2	LINC01800	-1.84724	-1.1431	-7.47143	1.36569e-12	3.8354e-11	18.1313
ENSG00000247400.3	chr13	DNAJC3-DT	1.09456	1.26041	7.47118	1.36781e-12	3.8354e-11	18.1258
ENSG00000198598.6	chr12	MMP17	-1.74769	3.30684	-7.49205	1.20167e-12	3.44109e-11	18.101
ENSG00000116885.18	chr1	OSCP1	1.23105	-1.12855	7.46474	1.42348e-12	3.97805e-11	18.0999
ENSG00000055813.6	chr2	CCDC85A	3.44465	-2.92081	7.48115	1.28582e-12	3.65088e-11	18.0825
ENSG00000233554.5	chr9	B4GALT1-AS1	0.819717	-0.239841	7.45492	1.51277e-12	4.19471e-11	18.0618
ENSG00000245552.6	chr11	AP000787.1	-0.997685	1.43121	-7.45941	1.47132e-12	4.09103e-11	18.0541
ENSG00000142798.20	chr1	HSPG2	-1.75339	1.61628	-7.45054	1.55441e-12	4.30424e-11	17.9924
ENSG00000100644.17	chr14	HIF1A	-1.6513	6.1807	-7.50923	1.07997e-12	3.12368e-11	17.9662
ENSG00000162896.6	chr1	PIGR	-2.59964	0.0805058	-7.42256	1.84795e-12	5.0304e-11	17.8688
ENSG00000154040.20	chr18	CABYR	-2.49337	-3.27733	-7.4659	1.41332e-12	3.95709e-11	17.8418
ENSG00000066294.14	chr1	CD84	-1.11297	5.90256	-7.48863	1.2275e-12	3.50507e-11	17.8354
ENSG00000265752.2	chr18	AC010754.1	-2.45687	-4.12675	-7.4993	1.14876e-12	3.29425e-11	17.8329
ENSG00000010932.17	chr1	FMO1	-2.16913	-1.21914	-7.42245	1.84914e-12	5.0304e-11	17.8315
ENSG00000187837.3	chr6	HIST1H1C	1.57362	5.25515	7.48007	1.29443e-12	3.67018e-11	17.8168
ENSG00000141665.12	chr18	FBXO15	-1.274	-0.502356	-7.41437	1.94379e-12	5.28075e-11	17.8158
ENSG00000104881.16	chr19	PPP1R13L	-0.944025	2.0588	-7.42558	1.81372e-12	4.96763e-11	17.8089
ENSG00000150627.15	chr4	WDR17	-2.15356	0.502425	-7.40716	2.03213e-12	5.5059e-11	17.772
ENSG00000172403.11	chr4	SYNPO2	1.19059	0.35188	7.37646	2.45523e-12	6.60778e-11	17.5886
ENSG00000165929.13	chr14	TC2N	-1.80539	1.77061	-7.3794	2.41121e-12	6.49799e-11	17.559
ENSG00000162631.18	chr1	NTNG1	2.66101	0.662582	7.36964	2.56039e-12	6.86327e-11	17.5303
ENSG00000180573.9	chr6	HIST1H2AC	1.32256	5.90978	7.43677	1.69264e-12	4.65498e-11	17.5143
ENSG00000112367.10	chr6	FIG4	-0.959491	5.27595	-7.41318	1.95811e-12	5.3125e-11	17.4083
ENSG00000124635.8	chr6	HIST1H2BJ	1.17287	0.81227	7.34467	2.98494e-12	7.91696e-11	17.3868
ENSG00000173621.9	chr11	LRFN4	-0.849729	2.55143	-7.34928	2.90151e-12	7.73647e-11	17.3141
ENSG00000143869.7	chr2	GDF7	-2.67673	4.30308	-7.37097	2.53956e-12	6.81653e-11	17.2888
ENSG00000174684.7	chr11	B4GAT1	0.899181	3.538	7.36095	2.70082e-12	7.23008e-11	17.2553
ENSG00000184060.11	chr17	ADAP2	-1.11836	3.22092	-7.33795	3.11046e-12	8.2174e-11	17.1774
ENSG00000165507.8	chr10	DEPP1	1.99323	3.2201	7.33845	3.10091e-12	8.20293e-11	17.153
ENSG00000119771.15	chr2	KLHL29	-2.31142	-1.29365	-7.30759	3.74625e-12	9.76889e-11	17.1523
ENSG00000106803.10	chr9	SEC61B	0.859164	6.09813	7.37372	2.4969e-12	6.71095e-11	17.1269
ENSG00000269919.1	chr6	AL022067.1	1.77866	-1.36053	7.29729	3.9898e-12	1.03637e-10	17.1028
ENSG00000238113.6	chr9	LINC01410	-1.66055	1.01713	-7.29614	4.01773e-12	1.04228e-10	17.0988
ENSG00000114248.9	chr3	LRRC31	3.83785	-1.39223	7.29345	4.08435e-12	1.0582e-10	17.0933
ENSG00000140931.20	chr16	CMTM3	-1.2745	3.91496	-7.33443	3.17827e-12	8.37458e-11	17.088
ENSG00000149591.16	chr11	TAGLN	-1.38903	4.09734	-7.33848	3.10044e-12	8.20293e-11	17.0752
ENSG00000158077.4	chr11	NLRP14	1.87105	-0.918341	7.286	4.27456e-12	1.10181e-10	17.052
ENSG00000272086.1	chr5	AC025181.2	0.933656	0.95778	7.28845	4.21117e-12	1.08825e-10	17.0507
ENSG00000175779.2	chr15	C15orf53	1.45049	-1.27494	7.28505	4.29955e-12	1.10583e-10	17.0341
ENSG00000143674.11	chr1	MAP3K21	-1.3455	0.683002	-7.26231	4.93932e-12	1.25231e-10	16.9103
ENSG00000173706.14	chr3	HEG1	-1.22951	2.66392	-7.28322	4.34766e-12	1.11494e-10	16.9093
ENSG00000129595.13	chr5	EPB41L4A	-1.93534	1.77813	-7.26969	4.72191e-12	1.20325e-10	16.8988
ENSG00000231265.1	chr20	TRERNA1	-1.99817	-2.76223	-7.2876	4.23314e-12	1.09253e-10	16.8885
ENSG00000196405.13	chr14	EVL	-0.935276	7.20836	-7.33138	3.23834e-12	8.51203e-11	16.8563
ENSG00000278828.1	chr6	HIST1H3H	1.2986	1.34513	7.25725	5.09394e-12	1.28665e-10	16.8393
ENSG00000169435.14	chr4	RASSF6	2.82634	5.89465	7.3203	3.46577e-12	9.06097e-11	16.8301
ENSG00000163449.11	chr2	TMEM169	-1.99604	-1.29426	-7.25052	5.30691e-12	1.33876e-10	16.8256
ENSG00000160188.10	chr21	RSPH1	1.78117	0.00334453	7.24592	5.45754e-12	1.37504e-10	16.8229
ENSG00000149527.18	chr1	PLCH2	-1.92571	2.63088	-7.26402	4.88785e-12	1.24082e-10	16.7966
ENSG00000160746.12	chr3	ANO10	0.814131	3.19882	7.27083	4.68917e-12	1.19642e-10	16.7642
ENSG00000183250.11	chr21	LINC01547	1.02837	-0.0562091	7.23564	5.80986e-12	1.4493e-10	16.7632
ENSG00000103089.9	chr16	FA2H	-2.01779	1.61271	-7.24252	5.57189e-12	1.40035e-10	16.7514
ENSG00000162873.14	chr1	KLHDC8A	-1.94004	-1.0387	-7.22739	6.10847e-12	1.51068e-10	16.6968
ENSG00000026559.14	chr20	KCNG1	-3.73091	-1.92165	-7.23702	5.76123e-12	1.44074e-10	16.6947
ENSG00000137841.12	chr15	PLCB2	-1.06376	6.71486	-7.30142	3.89029e-12	1.01314e-10	16.6815
ENSG00000000938.13	chr1	FGR	-1.31503	5.97069	-7.27651	4.52956e-12	1.15863e-10	16.6026
ENSG00000096060.14	chr6	FKBP5	1.02403	6.08151	7.28032	4.42538e-12	1.13343e-10	16.5649
ENSG00000088727.12	chr3	KIF9	0.809798	0.921615	7.19575	7.40141e-12	1.81483e-10	16.5051
ENSG00000169508.7	chr13	GPR183	0.942223	8.47801	7.2677	4.7795e-12	1.21485e-10	16.4764
ENSG00000144821.9	chr3	MYH15	1.4024	0.325583	7.18645	7.83022e-12	1.90605e-10	16.4672
ENSG00000181908.5	chr11	AP003774.1	-1.80615	-2.33145	-7.19363	7.49699e-12	1.83603e-10	16.4144
ENSG00000253669.3	chr8	GASAL1	0.967129	0.513244	7.1542	9.51614e-12	2.28603e-10	16.2748
ENSG00000279601.1	chrX	AC005052.1	1.84232	-2.41727	7.16268	9.04132e-12	2.17977e-10	16.2633
ENSG00000274373.1	chr12	AC148476.1	-2.39942	-2.67432	-7.16916	8.69412e-12	2.09858e-10	16.2287
ENSG00000227070.1	chr1	AC104170.1	1.633	-1.85156	7.14963	9.78264e-12	2.33889e-10	16.2244
ENSG00000253865.1	chr5	AC131025.1	-1.91436	-3.35974	-7.18364	7.96477e-12	1.93412e-10	16.2194
ENSG00000169213.7	chr1	RAB3B	4.31059	-0.370569	7.13727	1.05401e-11	2.48457e-10	16.1875
ENSG00000276649.1	chr20	AL117335.1	1.61483	-0.921137	7.13157	1.09081e-11	2.56831e-10	16.1542
ENSG00000163564.14	chr1	PYHIN1	-1.61518	4.47581	-7.18386	7.95406e-12	1.93386e-10	16.1315
ENSG00000231079.7	chr2	AC105402.3	-2.25296	-4.06374	-7.18684	7.81186e-12	1.90553e-10	16.0898
ENSG00000248571.1	chr4	AC106882.1	1.56629	3.2001	7.15444	9.50249e-12	2.28548e-10	16.0688
ENSG00000186265.10	chr3	BTLA	-1.37507	5.1209	-7.1867	7.81863e-12	1.90553e-10	16.0674
ENSG00000049192.15	chr5	ADAMTS6	-1.44042	2.08962	-7.12479	1.13629e-11	2.65984e-10	16.0163
ENSG00000124191.18	chr20	TOX2	-1.95122	1.30604	-7.11258	1.22293e-11	2.85271e-10	16.0069
ENSG00000205593.12	chr22	DENND6B	0.801348	3.85588	7.14493	1.00639e-11	2.39193e-10	15.9301
ENSG00000169962.5	chr1	TAS1R3	1.79568	6.37761	7.16918	8.69278e-12	2.09858e-10	15.8972
ENSG00000140995.16	chr16	DEF8	-1.02967	5.89931	-7.15325	9.57105e-12	2.29648e-10	15.818
ENSG00000103187.8	chr16	COTL1	-0.895573	8.9274	-7.1518	9.6551e-12	2.31389e-10	15.788
ENSG00000249096.6	chr4	LINC02362	1.82642	2.49853	7.0882	1.41589e-11	3.28759e-10	15.7572
ENSG00000187942.11	chr1	LDLRAD2	-2.35536	-0.0541567	-7.0555	1.72255e-11	3.93231e-10	15.7175
ENSG00000216316.1	chr6	AL022722.1	1.87077	-2.00369	7.06206	1.65624e-11	3.8018e-10	15.71
ENSG00000266017.1	chr9	MIR4477B	-1.69692	-1.0561	-7.05547	1.72286e-11	3.93231e-10	15.7061
ENSG00000125257.15	chr13	ABCC4	-1.00485	2.93689	-7.07989	1.48828e-11	3.43585e-10	15.6782
ENSG00000139679.15	chr13	LPAR6	2.01752	3.42001	7.07993	1.488e-11	3.43585e-10	15.5996
ENSG00000143079.15	chr1	CTTNBP2NL	-1.46242	0.618795	-7.03628	1.93239e-11	4.37874e-10	15.5916
ENSG00000178226.10	chr16	PRSS36	-1.33345	-0.985955	-7.03043	2.00114e-11	4.50614e-10	15.5674
ENSG00000120327.6	chr5	PCDHB14	1.85091	-1.26836	7.02948	2.01243e-11	4.52651e-10	15.56
ENSG00000179477.10	chr17	ALOX12B	-1.71347	-2.23283	-7.0247	2.07075e-11	4.6473e-10	15.4623
ENSG00000162413.16	chr1	KLHL21	0.804691	5.92308	7.08555	1.43862e-11	3.33266e-10	15.41
ENSG00000137193.14	chr6	PIM1	1.10941	8.80344	7.08722	1.42426e-11	3.30319e-10	15.4067
ENSG00000155367.15	chr1	PPM1J	-1.25497	0.133496	-7.00214	2.36889e-11	5.24622e-10	15.4061
ENSG00000234289.5	chr21	H2BFS	1.17897	-0.478376	7.00011	2.39781e-11	5.2928e-10	15.4001
ENSG00000135631.16	chr2	RAB11FIP5	0.894019	3.74964	7.04454	1.83931e-11	4.18385e-10	15.3529
ENSG00000169554.20	chr2	ZEB2	-0.930157	6.77069	-7.07606	1.52292e-11	3.51178e-10	15.3422
ENSG00000174804.4	chr11	FZD4	2.1132	-2.06862	6.99599	2.45733e-11	5.41231e-10	15.3387
ENSG00000278921.2	chr5	EPB41L4A-DT	-2.37472	-3.62475	-7.03072	1.99769e-11	4.50614e-10	15.3208
ENSG00000198053.11	chr20	SIRPA	1.32438	5.76391	7.06611	1.61649e-11	3.71904e-10	15.3167
ENSG00000262831.1	chr17	AC145207.3	1.02786	-0.68286	6.98105	2.68578e-11	5.85146e-10	15.2915
ENSG00000142765.18	chr1	SYTL1	-0.872241	6.41361	-7.06504	1.62689e-11	3.7387e-10	15.2809
ENSG00000181885.18	chr17	CLDN7	-1.81082	-1.80796	-6.98594	2.60874e-11	5.70831e-10	15.2764
ENSG00000107518.18	chr10	ATRNL1	-1.98652	-1.74349	-6.98495	2.62419e-11	5.7359e-10	15.2741
ENSG00000205537.2	chr12	AC121338.1	1.90312	-2.66602	6.99049	2.53904e-11	5.56792e-10	15.2511
ENSG00000100625.9	chr14	SIX4	3.61792	-2.08703	6.97732	2.74601e-11	5.96976e-10	15.244
ENSG00000174607.11	chr4	UGT8	-1.8354	1.61597	-6.98451	2.63109e-11	5.74474e-10	15.2421
ENSG00000164649.20	chr7	CDCA7L	-1.01937	6.07453	-7.0556	1.72152e-11	3.93231e-10	15.2367
ENSG00000131187.9	chr5	F12	-1.31762	-0.836726	-6.96983	2.87099e-11	6.2032e-10	15.2239
ENSG00000131669.10	chr9	NINJ1	1.54479	4.93262	7.03617	1.93368e-11	4.37874e-10	15.1946
ENSG00000182901.16	chr1	RGS7	-2.87802	-3.8716	-7.01761	2.16019e-11	4.8265e-10	15.1907
ENSG00000149557.13	chr11	FEZ1	1.82881	0.551451	6.96615	2.93428e-11	6.32441e-10	15.1797
ENSG00000233108.1	chr7	AC006042.2	1.09899	-1.71073	6.96279	2.99352e-11	6.4452e-10	15.1645
ENSG00000166598.15	chr12	HSP90B1	0.813478	9.87028	7.04101	1.87852e-11	4.26823e-10	15.145
ENSG00000128228.5	chr22	SDF2L1	1.03537	5.1309	7.02373	2.08276e-11	4.66904e-10	15.094
ENSG00000079557.5	chr4	AFM	2.70188	-4.7655	6.99577	2.46057e-11	5.41352e-10	14.9805
ENSG00000256482.1	chr12	AC023796.2	3.07867	1.12656	6.93716	3.48469e-11	7.42331e-10	14.9638
ENSG00000205268.10	chr8	PDE7A	-0.813332	6.59674	-7.01031	2.25632e-11	5.02456e-10	14.9566
ENSG00000272256.1	chr8	AC044849.1	1.2262	2.87936	6.9562	3.11285e-11	6.6878e-10	14.9425
ENSG00000273983.1	chr6	HIST1H3G	1.36336	-0.889857	6.91819	3.89866e-11	8.2789e-10	14.9333
ENSG00000260192.2	chr5	LINC02240	2.36018	-0.913969	6.91694	3.92765e-11	8.33166e-10	14.9261
ENSG00000170989.9	chr1	S1PR1	-1.24344	6.84521	-7.00484	2.33112e-11	5.16826e-10	14.9236
ENSG00000249348.1	chr4	UGDH-AS1	0.84997	0.788508	6.92124	3.82901e-11	8.13957e-10	14.9176
ENSG00000141682.11	chr18	PMAIP1	1.5825	7.72456	6.9884	2.57082e-11	5.63146e-10	14.8223
ENSG00000250746.1	chr4	AC105250.1	1.08742	0.305907	6.89572	4.45201e-11	9.36503e-10	14.7912
ENSG00000110917.8	chr12	MLEC	0.826525	6.98271	6.97955	2.70987e-11	5.89756e-10	14.7699
ENSG00000074842.7	chr19	MYDGF	0.902639	6.08081	6.97606	2.76658e-11	6.00798e-10	14.7672
ENSG00000147443.13	chr8	DOK2	-1.38402	4.03269	-6.94447	3.33699e-11	7.11621e-10	14.7671
ENSG00000285163.1	chr16	AC092723.5	-1.7899	-1.1593	-6.88902	4.63144e-11	9.72217e-10	14.7588
ENSG00000228548.1	chr1	ITPKB-AS1	1.7388	-2.47948	6.8843	4.762e-11	9.95471e-10	14.6805
ENSG00000130598.16	chr11	TNNI2	-1.03629	1.31348	-6.87637	4.98965e-11	1.03875e-09	14.6418
ENSG00000197956.10	chr1	S100A6	-0.957761	6.47956	-6.95273	3.17752e-11	6.79773e-10	14.6279
ENSG00000185933.6	chr10	CALHM1	-3.00132	-2.97777	-6.88662	4.69742e-11	9.84578e-10	14.6177
ENSG00000198520.12	chr1	ARMH1	-1.26577	2.99764	-6.89188	4.55393e-11	9.56943e-10	14.5842
ENSG00000232815.1	chr9	DUX4L50	-1.90983	-0.816478	-6.85095	5.79443e-11	1.1915e-09	14.5515
ENSG00000258545.5	chrX	RHOXF1-AS1	1.75777	-0.595146	6.85045	5.81153e-11	1.1938e-09	14.5497
ENSG00000180287.16	chr1	PLD5	-3.37712	-1.47637	-6.85397	5.69261e-11	1.17296e-09	14.5465
ENSG00000127074.14	chr1	RGS13	3.05422	-0.446678	6.84938	5.84836e-11	1.20014e-09	14.5403
ENSG00000236914.3	chr15	LINC01852	2.31975	-3.48641	6.86612	5.29996e-11	1.09767e-09	14.4873
ENSG00000139531.13	chr12	SUOX	0.926984	2.60713	6.8651	5.33208e-11	1.10319e-09	14.4489
ENSG00000198088.10	chrX	NUP62CL	1.56657	-0.45638	6.8294	6.5756e-11	1.33981e-09	14.4293
ENSG00000137727.12	chr11	ARHGAP20	-2.28088	0.287357	-6.82641	6.69199e-11	1.3594e-09	14.4047
ENSG00000128886.12	chr15	ELL3	1.35849	-1.51796	6.82487	6.75257e-11	1.37e-09	14.399
ENSG00000245522.2	chr11	AC026250.1	1.00943	-0.886316	6.82025	6.93776e-11	1.39944e-09	14.3804
ENSG00000154358.20	chr1	OBSCN	-1.28006	5.14581	-6.89695	4.41976e-11	9.30692e-10	14.3785
ENSG00000268895.5	chr19	A1BG-AS1	-0.941264	2.90382	-6.85143	5.77803e-11	1.18934e-09	14.3517
ENSG00000186806.5	chr19	VSIG10L	-1.2314	0.0534162	-6.81463	7.17026e-11	1.44056e-09	14.3416
ENSG00000183734.4	chr11	ASCL2	-1.27653	0.230258	-6.8147	7.16711e-11	1.44056e-09	14.3378
ENSG00000177839.6	chr5	PCDHB9	2.10245	-1.39501	6.80715	7.49106e-11	1.50052e-09	14.302
ENSG00000163873.10	chr1	GRIK3	-4.28618	-0.31452	-6.80256	7.69486e-11	1.53828e-09	14.2806
ENSG00000246375.2	chr4	PPM1K-DT	1.15028	-0.707306	6.79974	7.82282e-11	1.56231e-09	14.2653
ENSG00000135596.18	chr6	MICAL1	-0.859808	6.88746	-6.88548	4.72898e-11	9.89595e-10	14.2262
ENSG00000168916.15	chr5	ZNF608	1.73461	4.74301	6.86911	5.20773e-11	1.08079e-09	14.2245
ENSG00000228325.5	chr2	IGKV3D-7	1.71306	-1.09548	6.78963	8.29891e-11	1.64296e-09	14.2083
ENSG00000196576.15	chr22	PLXNB2	1.00445	6.81762	6.87587	5.00443e-11	1.04075e-09	14.1751
ENSG00000118242.16	chr2	MREG	-1.06888	2.28576	-6.79707	7.94561e-11	1.58213e-09	14.1091
ENSG00000151689.13	chr2	INPP1	0.838954	2.04269	6.7903	8.26624e-11	1.63948e-09	14.0763
ENSG00000042493.16	chr2	CAPG	-0.881202	6.58574	-6.85833	5.54847e-11	1.14678e-09	14.0741
ENSG00000248714.6	chr17	AC091180.2	-1.31503	-1.15178	-6.75065	1.04166e-10	2.02801e-09	13.9874
ENSG00000139193.3	chr12	CD27	1.47161	6.69816	6.83804	6.2509e-11	1.27624e-09	13.9548
ENSG00000049759.18	chr18	NEDD4L	-1.41768	3.55354	-6.7896	8.3001e-11	1.64296e-09	13.9294
ENSG00000178996.14	chr5	SNX18	-0.814465	6.08329	-6.82474	6.75776e-11	1.37e-09	13.8944
ENSG00000272468.1	chr6	AL021807.1	1.24719	-1.28811	6.73141	1.16494e-10	2.25278e-09	13.8815
ENSG00000141738.14	chr17	GRB7	2.38942	-0.608689	6.73109	1.1671e-10	2.25478e-09	13.8803
ENSG00000114315.4	chr3	HES1	1.74511	3.50036	6.7849	8.53138e-11	1.68708e-09	13.8764
ENSG00000104081.14	chr15	BMF	-1.05665	7.11436	-6.82209	6.86339e-11	1.38722e-09	13.8603
ENSG00000136244.12	chr7	IL6	1.24289	4.34314	6.79789	7.90782e-11	1.57762e-09	13.8533
ENSG00000095303.16	chr9	PTGS1	-1.26724	4.58213	-6.79341	8.11756e-11	1.61206e-09	13.829
ENSG00000286167.1	chr2	AC105402.4	-2.04554	-3.16079	-6.74789	1.05851e-10	2.05882e-09	13.8211
ENSG00000112486.16	chr6	CCR6	-1.40327	0.325867	-6.71677	1.26823e-10	2.42918e-09	13.7847
ENSG00000237310.1	chr7	AC008267.5	0.801087	0.336233	6.7168	1.26804e-10	2.42918e-09	13.7794
ENSG00000136026.14	chr12	CKAP4	0.989736	7.56292	6.80603	7.54019e-11	1.50886e-09	13.7654
ENSG00000183484.12	chr14	GPR132	-0.928526	4.55721	-6.77728	8.91945e-11	1.76037e-09	13.7311
ENSG00000231752.6	chr1	EMBP1	-0.805118	2.36881	-6.72931	1.1792e-10	2.27598e-09	13.7198
ENSG00000147234.10	chrX	FRMPD3	-2.27478	-0.308739	-6.69909	1.40508e-10	2.68619e-09	13.7021
ENSG00000071242.12	chr6	RPS6KA2	-1.44096	4.32154	-6.75846	9.95356e-11	1.94917e-09	13.6574
ENSG00000162755.14	chr1	KLHDC9	0.828047	0.921238	6.6873	1.5043e-10	2.86499e-09	13.585
ENSG00000224152.1	chr2	AC009506.1	1.06117	0.318699	6.6808	1.56185e-10	2.96899e-09	13.5778
ENSG00000149428.19	chr11	HYOU1	0.89286	6.78087	6.76415	9.62913e-11	1.89301e-09	13.5294
ENSG00000099365.11	chr16	STX1B	-1.81665	-0.142308	-6.66784	1.68325e-10	3.17876e-09	13.5255
ENSG00000166689.16	chr11	PLEKHA7	-1.42447	0.6859	-6.67037	1.65893e-10	3.13626e-09	13.5133
ENSG00000230615.6	chr1	AL139220.2	1.44526	-1.56564	6.65962	1.76504e-10	3.31467e-09	13.4798
ENSG00000082293.13	chr6	COL19A1	-1.14275	4.16121	-6.72442	1.21318e-10	2.33932e-09	13.4736
ENSG00000188993.3	chr4	LRRC66	-1.98202	-2.2359	-6.65756	1.78616e-10	3.34796e-09	13.4284
ENSG00000199023.3	chr7	MIR339	1.2992	-1.54984	6.65001	1.86558e-10	3.47418e-09	13.4275
ENSG00000162415.7	chr1	ZSWIM5	1.83371	0.0900194	6.65082	1.85688e-10	3.46119e-09	13.4155
ENSG00000197629.5	chr11	MPEG1	-0.968372	9.16799	-6.73993	1.10867e-10	2.14903e-09	13.3962
ENSG00000152782.16	chr10	PANK1	-1.79207	-0.309463	-6.64015	1.97466e-10	3.66715e-09	13.3753
ENSG00000225889.7	chr2	AC012368.1	1.24227	4.54713	6.71709	1.26586e-10	2.42918e-09	13.3719
ENSG00000105825.13	chr7	TFPI2	-2.71254	-3.05303	-6.65913	1.77007e-10	3.32091e-09	13.3549
ENSG00000129048.6	chr3	ACKR4	1.54593	-1.48925	6.62774	2.12069e-10	3.92026e-09	13.3073
ENSG00000149050.10	chr11	ZNF214	2.35391	-3.92485	6.65975	1.76371e-10	3.31467e-09	13.3068
ENSG00000183508.5	chr1	TENT5C	0.81061	8.66273	6.72252	1.22659e-10	2.36292e-09	13.2937
ENSG00000197971.15	chr18	MBP	-0.945432	6.5612	-6.71749	1.26293e-10	2.42596e-09	13.2709
ENSG00000168502.17	chr18	MTCL1	-1.54816	2.06679	-6.64137	1.96077e-10	3.64472e-09	13.2558
ENSG00000104888.10	chr19	SLC17A7	-1.58437	-2.32972	-6.62582	2.14431e-10	3.95666e-09	13.2504
ENSG00000166780.11	chr16	C16orf45	-2.22631	-1.55909	-6.61402	2.29468e-10	4.21096e-09	13.2215
ENSG00000116285.13	chr1	ERRFI1	1.17868	0.163869	6.60563	2.40797e-10	4.39881e-09	13.1661
ENSG00000162551.14	chr1	ALPL	-2.5855	1.61886	-6.61893	2.23096e-10	4.10524e-09	13.1643
ENSG00000163702.20	chr3	IL17RC	0.866912	1.10083	6.60753	2.38181e-10	4.35596e-09	13.1309
ENSG00000112195.9	chr6	TREML2	-1.37351	4.21505	-6.66477	1.71342e-10	3.22967e-09	13.13
ENSG00000196747.4	chr6	HIST1H2AI	1.34983	-1.13306	6.59221	2.60045e-10	4.71619e-09	13.1157
ENSG00000071909.18	chr2	MYO3B	3.79584	-0.226415	6.59418	2.57124e-10	4.67163e-09	13.1033
ENSG00000126246.10	chr19	IGFLR1	-0.952512	1.64059	-6.60749	2.38235e-10	4.35596e-09	13.0967
ENSG00000184867.14	chrX	ARMCX2	1.43337	4.49475	6.66653	1.69609e-10	3.20001e-09	13.0858
ENSG00000180712.3	chr4	LINC02363	2.39764	-1.13356	6.58655	2.68619e-10	4.86731e-09	13.0847
ENSG00000170390.16	chr4	DCLK2	-2.38054	0.916803	-6.59374	2.57772e-10	4.67918e-09	13.0728
ENSG00000206535.8	chr3	LNP1	0.95432	0.510135	6.58591	2.69596e-10	4.88061e-09	13.0444
ENSG00000271133.5	chr7	AC004130.1	1.96067	0.0845503	6.57822	2.81738e-10	5.07759e-09	13.0132
ENSG00000204252.14	chr6	HLA-DOA	-1.01373	5.38674	-6.66051	1.75604e-10	3.30691e-09	13
ENSG00000186583.11	chr8	SPATC1	-1.72323	-0.926733	-6.56369	3.06142e-10	5.48794e-09	12.9596
ENSG00000182809.10	chr14	CRIP2	-1.6765	1.77622	-6.56904	2.9692e-10	5.34643e-09	12.8797
ENSG00000258072.1	chr12	AC126177.6	-1.83592	-1.97599	-6.54237	3.45748e-10	6.13779e-09	12.8186
ENSG00000168268.11	chr3	NT5DC2	1.24763	4.52893	6.61356	2.30081e-10	4.21837e-09	12.8046
ENSG00000187243.16	chrX	MAGED4B	-2.35196	-3.06376	-6.54726	3.36241e-10	5.99015e-09	12.7564
ENSG00000168421.13	chr4	RHOH	-1.77033	7.11079	-6.62628	2.13863e-10	3.94979e-09	12.7523
ENSG00000130158.14	chr19	DOCK6	1.04027	4.23059	6.60077	2.47596e-10	4.51481e-09	12.7486
ENSG00000175600.15	chr7	SUGCT	-1.20601	-1.33205	-6.51983	3.93088e-10	6.93536e-09	12.7174
ENSG00000100003.18	chr22	SEC14L2	1.63226	-1.32008	6.51892	3.95142e-10	6.96549e-09	12.7155
ENSG00000214290.8	chr11	COLCA2	1.69572	-1.17345	6.51383	4.06748e-10	7.12862e-09	12.6883
ENSG00000104972.15	chr19	LILRB1	-1.22189	5.15446	-6.60032	2.48235e-10	4.52236e-09	12.6772
ENSG00000254783.1	chr11	AP003084.1	-0.867044	0.516096	-6.51601	4.01735e-10	7.05701e-09	12.6639
ENSG00000272323.1	chr5	AC026801.2	-2.07599	-2.23869	-6.51585	4.02095e-10	7.05718e-09	12.6607
ENSG00000154479.13	chr2	CCDC173	1.84506	-2.28578	6.50889	4.18317e-10	7.29104e-09	12.6315
ENSG00000233251.7	chr2	AC007743.1	3.10293	-3.41784	6.51674	4.00061e-10	7.03988e-09	12.6161
ENSG00000158477.7	chr1	CD1A	-1.68054	0.525084	-6.50596	4.25328e-10	7.38764e-09	12.6103
ENSG00000141854.9	chr19	MISP3	1.08754	-0.400188	6.50017	4.39544e-10	7.61089e-09	12.6065
ENSG00000250436.1	chr4	LINC02499	2.46499	-4.89217	6.55438	3.22861e-10	5.77735e-09	12.5983
ENSG00000271615.1	chr2	ACTG1P22	2.64437	0.707004	6.50011	4.39693e-10	7.61089e-09	12.5449
ENSG00000128567.17	chr7	PODXL	1.28341	1.36206	6.50694	4.22976e-10	7.35313e-09	12.5434
ENSG00000180263.14	chr12	FGD6	-0.921885	0.932355	-6.49644	4.48959e-10	7.75128e-09	12.53
ENSG00000202474.1	chr9	RNA5SP283	-1.52413	-0.659094	-6.48405	4.81644e-10	8.25893e-09	12.5253
ENSG00000230943.2	chr6	LINC02541	2.08401	2.56051	6.52301	3.86042e-10	6.81703e-09	12.5168
ENSG00000186998.16	chr22	EMID1	1.79287	-1.63118	6.48097	4.90116e-10	8.3899e-09	12.5054
ENSG00000249738.10	chr5	AC008691.1	-1.1677	0.165054	-6.48431	4.80928e-10	8.25368e-09	12.5044
ENSG00000085563.14	chr7	ABCB1	-1.59483	0.472625	-6.48285	4.84915e-10	8.30794e-09	12.4882
ENSG00000135414.9	chr12	GDF11	0.933028	4.30622	6.54624	3.38209e-10	6.01988e-09	12.4335
ENSG00000204634.12	chr2	TBC1D8	-1.32507	2.14768	-6.48849	4.69675e-10	8.07432e-09	12.3949
ENSG00000275897.1	chr17	AC021491.4	-1.55075	-3.21714	-6.47196	5.15755e-10	8.81381e-09	12.3499
ENSG00000225434.2	chr9	LINC01504	-1.353	0.670317	-6.45889	5.55351e-10	9.44237e-09	12.3432
ENSG00000099958.14	chr22	DERL3	1.11476	6.30556	6.5483	3.34242e-10	5.9651e-09	12.3188
ENSG00000047634.15	chrX	SCML1	-1.70598	-0.333099	-6.4447	6.01674e-10	1.01528e-08	12.3068
ENSG00000188859.6	chr1	FAM78B	-2.44459	-3.23654	-6.46133	5.47731e-10	9.32069e-09	12.2945
ENSG00000196787.3	chr6	HIST1H2AG	0.854073	1.94746	6.4665	5.31966e-10	9.07543e-09	12.2812
ENSG00000232591.1	chr10	LINC02642	1.55496	-1.66647	6.43241	6.44865e-10	1.08239e-08	12.2445
ENSG00000143147.14	chr1	GPR161	-1.57978	-1.85243	-6.43232	6.45209e-10	1.08239e-08	12.2345
ENSG00000203710.11	chr1	CR1	-1.30447	5.02848	-6.51072	4.13992e-10	7.2219e-09	12.2044
ENSG00000233387.1	chr10	IATPR	-2.43365	-3.00594	-6.44126	6.1349e-10	1.03262e-08	12.2019
ENSG00000232334.1	chr10	AL683842.1	1.66548	-1.85939	6.42397	6.76267e-10	1.13261e-08	12.1966
ENSG00000130396.20	chr6	AFDN	-1.05977	5.69417	-6.51333	4.07886e-10	7.14013e-09	12.1638
ENSG00000105855.10	chr7	ITGB8	2.48458	0.066773	6.41411	7.14872e-10	1.19132e-08	12.1159
ENSG00000186174.12	chr11	BCL9L	-0.80225	5.96108	-6.50832	4.19672e-10	7.30201e-09	12.1118
ENSG00000007312.12	chr17	CD79B	0.83536	8.3488	6.49787	4.45339e-10	7.702e-09	12.0297
ENSG00000231806.3	chr9	PCAT7	2.80634	-2.94325	6.39445	7.98401e-10	1.31635e-08	11.9995
ENSG00000082512.15	chr1	TRAF5	-0.837604	7.14102	-6.49133	4.62173e-10	7.96576e-09	11.9941
ENSG00000160097.18	chr1	FNDC5	-1.97907	-1.39471	-6.38358	8.48616e-10	1.39003e-08	11.9853
ENSG00000111729.14	chr12	CLEC4A	-1.33192	-1.82876	-6.38451	8.44178e-10	1.38389e-08	11.9812
ENSG00000166289.6	chr19	PLEKHF1	-1.04939	1.45904	-6.4006	7.7127e-10	1.2737e-08	11.9794
ENSG00000123612.16	chr2	ACVR1C	1.58847	-0.621766	6.38202	8.56069e-10	1.39933e-08	11.9705
ENSG00000106336.13	chr7	FBXO24	-0.8832	-0.36217	-6.38195	8.56379e-10	1.39933e-08	11.9671
ENSG00000152413.14	chr5	HOMER1	-0.910149	1.19956	-6.39384	8.01129e-10	1.31869e-08	11.9585
ENSG00000085733.16	chr11	CTTN	1.42567	2.34074	6.41377	7.1622e-10	1.19257e-08	11.9456
ENSG00000129757.13	chr11	CDKN1C	1.75324	2.56259	6.41709	7.02992e-10	1.17346e-08	11.9297
ENSG00000236234.1	chr17	AC091132.2	2.01325	-3.47114	6.38304	8.51157e-10	1.39306e-08	11.8848
ENSG00000114554.11	chr3	PLXNA1	0.980927	5.17412	6.46174	5.46456e-10	9.30686e-09	11.8843
ENSG00000087258.15	chr16	GNAO1	-2.79735	0.568813	-6.36587	9.3712e-10	1.52138e-08	11.8534
ENSG00000165966.15	chr12	PDZRN4	2.95254	-3.23949	6.37048	9.1326e-10	1.48621e-08	11.8495
ENSG00000203721.6	chr1	LINC00862	1.747	-1.9515	6.35693	9.85177e-10	1.59175e-08	11.8386
ENSG00000159618.16	chr16	ADGRG5	-1.26467	3.63416	-6.4187	6.96646e-10	1.16383e-08	11.836
ENSG00000113811.11	chr3	SELENOK	0.8404	6.0414	6.45789	5.58494e-10	9.47981e-09	11.8228
ENSG00000104783.13	chr19	KCNN4	-1.11921	6.41829	-6.45652	5.62841e-10	9.54554e-09	11.8143
ENSG00000182156.10	chr17	ENPP7	1.80514	-0.906332	6.34666	1.04341e-09	1.67904e-08	11.7855
ENSG00000103253.18	chr16	HAGHL	0.86391	3.74836	6.41653	7.05219e-10	1.1762e-08	11.7833
ENSG00000132464.11	chr4	ENAM	1.85751	2.91798	6.39287	8.05506e-10	1.32481e-08	11.7693
ENSG00000244039.1	chr3	AC008040.3	1.32493	-2.38793	6.34342	1.06244e-09	1.70694e-08	11.7509
ENSG00000239219.2	chr3	AC008040.1	1.4802	2.07051	6.37034	9.13979e-10	1.48621e-08	11.7328
ENSG00000230102.7	chr3	LINC02028	1.91718	-3.27332	6.34984	1.02501e-09	1.65158e-08	11.7279
ENSG00000237989.1	chr21	LINC01679	1.01295	3.96468	6.40993	7.31876e-10	1.21462e-08	11.7232
ENSG00000145050.16	chr3	MANF	0.949469	5.66813	6.43233	6.45148e-10	1.08239e-08	11.6989
ENSG00000177697.19	chr11	CD151	0.960788	3.82839	6.39999	7.73922e-10	1.27703e-08	11.6923
ENSG00000141542.11	chr17	RAB40B	0.878435	2.489	6.36751	9.28535e-10	1.50866e-08	11.6883
ENSG00000184164.14	chr22	CRELD2	0.876422	5.86669	6.42051	6.89599e-10	1.15302e-08	11.6244
ENSG00000198208.11	chr14	RPS6KL1	1.3002	1.10699	6.32615	1.1699e-09	1.87212e-08	11.5914
ENSG00000124496.12	chr6	TRERF1	-1.24844	2.96201	-6.35693	9.85205e-10	1.59175e-08	11.5899
ENSG00000181773.7	chr1	GPR3	1.85747	-2.2277	6.31201	1.26578e-09	2.01116e-08	11.5895
ENSG00000275342.4	chr8	PRAG1	-1.02472	3.78875	-6.37639	8.83519e-10	1.44134e-08	11.5826
ENSG00000097096.9	chr1	SYDE2	-1.69986	-2.17473	-6.30245	1.33487e-09	2.11426e-08	11.5304
ENSG00000259421.1	chr22	AL022318.2	-1.67879	-0.979412	-6.29392	1.39971e-09	2.20827e-08	11.5092
ENSG00000280135.1	chr6	AL096816.1	-1.47772	-0.429024	-6.29329	1.40457e-09	2.21421e-08	11.4957
ENSG00000286219.1	chr1	AC242843.1	-1.03698	0.216143	-6.29654	1.37944e-09	2.17971e-08	11.4917
ENSG00000103522.16	chr16	IL21R	-1.1056	3.74142	-6.35099	1.01844e-09	1.64281e-08	11.4525
ENSG00000251350.1	chr4	LINC02475	2.7765	-4.30906	6.31131	1.2707e-09	2.01738e-08	11.4251
ENSG00000116147.17	chr1	TNR	-2.5882	0.339755	-6.2793	1.51802e-09	2.37631e-08	11.4015
ENSG00000165338.16	chr10	HECTD2	-0.966011	1.86741	-6.29869	1.36304e-09	2.15549e-08	11.3949
ENSG00000181804.15	chr3	SLC9A9	-0.821125	3.27556	-6.32538	1.17494e-09	1.87869e-08	11.3734
ENSG00000204791.10	chr8	SMPD5	-2.0108	-2.04676	-6.27116	1.58805e-09	2.47786e-08	11.3723
ENSG00000213626.13	chr2	LBH	-1.05761	7.65431	-6.37392	8.95822e-10	1.46023e-08	11.3439
ENSG00000258376.2	chr14	AC004846.1	-1.2798	0.496767	-6.26108	1.67922e-09	2.60435e-08	11.2868
ENSG00000270021.1	chr5	AC026691.1	1.03822	-1.49955	6.24881	1.79719e-09	2.77235e-08	11.2719
ENSG00000187634.12	chr1	SAMD11	1.72911	-2.02344	6.24282	1.8576e-09	2.84592e-08	11.2347
ENSG00000236833.1	chr3	AC024560.1	1.64894	-1.50854	6.24131	1.87317e-09	2.86759e-08	11.2326
ENSG00000131584.19	chr1	ACAP3	0.816564	6.48903	6.34975	1.02552e-09	1.65158e-08	11.2172
ENSG00000168675.18	chr18	LDLRAD4	-1.15684	4.53293	-6.31744	1.22803e-09	1.95736e-08	11.1855
ENSG00000226822.2	chr1	AL390036.1	-1.75789	-3.35468	-6.24633	1.82191e-09	2.80404e-08	11.1582
ENSG00000177599.13	chr19	ZNF491	0.950242	0.348213	6.23219	1.96992e-09	2.99973e-08	11.1334
ENSG00000204531.18	chr6	POU5F1	1.53748	0.059363	6.22953	1.99897e-09	3.04167e-08	11.1311
ENSG00000177283.7	chr10	FZD8	1.68383	-0.665396	6.22168	2.08746e-09	3.16674e-08	11.1157
ENSG00000110987.8	chr12	BCL7A	-1.78086	3.17387	-6.2584	1.70435e-09	2.63722e-08	11.0364
ENSG00000128165.9	chr22	ADM2	1.0644	3.66841	6.27222	1.57878e-09	2.46759e-08	11.0159
ENSG00000285519.1	chr2	AC104781.2	1.95166	-3.31014	6.21124	2.21101e-09	3.32477e-08	11.0051
ENSG00000198947.15	chrX	DMD	-2.20122	0.956573	-6.2112	2.21145e-09	3.32477e-08	10.9928
ENSG00000230825.1	chr7	AC005532.1	1.39883	-0.999992	6.19658	2.39664e-09	3.58445e-08	10.9922
ENSG00000230138.1	chr1	AC119428.2	-1.55971	1.7668	-6.21547	2.16013e-09	3.26468e-08	10.9438
ENSG00000108375.12	chr17	RNF43	-1.14267	-0.863089	-6.18635	2.53518e-09	3.77763e-08	10.941
ENSG00000099204.20	chr10	ABLIM1	-1.16909	6.7366	-6.2909	1.42335e-09	2.24205e-08	10.8984
ENSG00000106789.13	chr9	CORO2A	-1.23578	2.64398	-6.21492	2.16662e-09	3.27203e-08	10.867
ENSG00000204020.5	chr10	LIPN	-1.63112	-0.872533	-6.16957	2.77957e-09	4.11438e-08	10.854
ENSG00000232311.1	chr6	AL512303.1	-1.59265	-1.94275	-6.16146	2.90575e-09	4.26665e-08	10.8092
ENSG00000262454.3	chr16	MIR193BHG	1.52796	-0.0443242	6.15698	2.97791e-09	4.36305e-08	10.7552
ENSG00000188687.17	chr2	SLC4A5	-1.1093	0.724481	-6.16251	2.88914e-09	4.24845e-08	10.7506
ENSG00000102174.9	chrX	PHEX	-2.46697	-0.900645	-6.14773	3.13242e-09	4.57611e-08	10.741
ENSG00000158321.16	chr7	AUTS2	-1.40288	2.63921	-6.1885	2.50546e-09	3.7361e-08	10.7183
ENSG00000111186.13	chr12	WNT5B	1.59366	1.06079	6.16147	2.90559e-09	4.26665e-08	10.7092
ENSG00000130783.13	chr12	CCDC62	-0.882539	0.451658	-6.14838	3.12141e-09	4.56334e-08	10.6951
ENSG00000170476.15	chr5	MZB1	1.09041	7.94877	6.24512	1.83412e-09	2.81853e-08	10.6439
ENSG00000197329.12	chr2	PELI1	1.24951	7.59835	6.24342	1.85147e-09	2.83868e-08	10.634
ENSG00000239961.3	chr19	LILRA4	-2.58863	-1.19831	-6.12642	3.51887e-09	5.09262e-08	10.6333
ENSG00000175764.14	chr9	TTLL11	0.841292	2.40157	6.16683	2.82166e-09	4.16748e-08	10.6108
ENSG00000129566.13	chr14	TEP1	-0.826615	6.75349	-6.23711	1.9171e-09	2.92594e-08	10.6048
ENSG00000130584.11	chr20	ZBTB46	-1.21128	-0.661726	-6.12155	3.61357e-09	5.21841e-08	10.5979
ENSG00000104177.18	chr15	MYEF2	-1.32311	3.12241	-6.17144	2.75128e-09	4.07549e-08	10.5716
ENSG00000263155.6	chr15	MYZAP	-1.77109	-2.47238	-6.11678	3.70875e-09	5.33673e-08	10.5625
ENSG00000250948.1	chr17	AC091180.4	-1.44729	-2.6363	-6.11341	3.77746e-09	5.42011e-08	10.5357
ENSG00000078081.8	chr3	LAMP3	1.95447	-0.214221	6.11182	3.81023e-09	5.45545e-08	10.522
ENSG00000274290.2	chr6	HIST1H2BE	0.879964	0.792273	6.11199	3.80676e-09	5.45545e-08	10.4733
ENSG00000185633.10	chr12	NDUFA4L2	1.1627	1.44905	6.1198	3.64829e-09	5.25724e-08	10.46
ENSG00000235397.1	chr17	EPN2-AS1	1.94428	-3.22079	6.0996	4.07227e-09	5.79356e-08	10.4468
ENSG00000118523.6	chr6	CCN2	2.34852	1.83128	6.12949	3.46047e-09	5.01171e-08	10.4428
ENSG00000174307.6	chr1	PHLDA3	1.662	-0.266613	6.09296	4.22171e-09	5.97659e-08	10.4315
ENSG00000228594.4	chr1	FNDC10	-0.992445	0.794053	-6.09741	4.12095e-09	5.85455e-08	10.4087
ENSG00000128590.5	chr7	DNAJB9	0.918585	6.28894	6.19097	2.4717e-09	3.6885e-08	10.3634
ENSG00000266907.1	chr19	AC006116.1	1.28611	-2.62499	6.07786	4.58245e-09	6.44199e-08	10.363
ENSG00000251002.7	chr14	AC244502.1	-1.57801	-0.871185	-6.06278	4.9726e-09	6.96129e-08	10.2996
ENSG00000131080.15	chrX	EDA2R	1.80864	0.601251	6.076	4.62883e-09	6.50266e-08	10.2929
ENSG00000253250.3	chr8	C8orf88	1.34044	1.11739	6.08176	4.48652e-09	6.32037e-08	10.2898
ENSG00000239941.1	chr3	AC108718.1	-1.55148	-1.99267	-6.0602	5.04239e-09	7.04919e-08	10.2868
ENSG00000152270.9	chr11	PDE3B	-1.2112	2.42966	-6.10196	4.02017e-09	5.73116e-08	10.2846
ENSG00000254780.1	chr11	AC023232.1	1.57336	-1.80996	6.05237	5.26052e-09	7.34394e-08	10.2518
ENSG00000166452.11	chr11	AKIP1	0.843241	2.69508	6.10374	3.98164e-09	5.69278e-08	10.2459
ENSG00000145014.17	chr3	TMEM44	-0.923498	2.03451	-6.0858	4.38923e-09	6.19633e-08	10.2437
ENSG00000247982.6	chr15	LINC00926	-1.11317	7.55537	-6.16397	2.86609e-09	4.2238e-08	10.2087
ENSG00000177685.17	chr11	CRACR2B	1.2509	4.23009	6.13245	3.40497e-09	4.93844e-08	10.1892
ENSG00000254415.3	chr19	SIGLEC14	-2.1962	2.5136	-6.08123	4.49944e-09	6.33414e-08	10.1756
ENSG00000091831.23	chr6	ESR1	1.07115	1.88141	6.06867	4.81645e-09	6.75209e-08	10.1573
ENSG00000187699.10	chr2	C2orf88	1.04572	2.93004	6.09187	4.24689e-09	6.0038e-08	10.1546
ENSG00000180447.7	chr9	GAS1	1.605	-1.61897	6.02903	5.96723e-09	8.28458e-08	10.1322
ENSG00000128218.8	chr22	VPREB3	1.35858	5.91911	6.13789	3.30544e-09	4.80447e-08	10.0927
ENSG00000274559.3	chr21	CU639417.1	1.10658	-1.76133	6.02049	6.24827e-09	8.64494e-08	10.0888
ENSG00000203812.2	chr1	HIST2H2AA3	1.16275	-1.1803	6.0198	6.27168e-09	8.67137e-08	10.0805
ENSG00000133067.17	chr1	LGR6	-1.50709	-0.440586	-6.01855	6.31414e-09	8.72409e-08	10.0614
ENSG00000230306.1	chr10	BANF1P2	-1.25362	-1.85118	-6.00208	6.89917e-09	9.48683e-08	9.993
ENSG00000187210.14	chr9	GCNT1	-1.18673	2.5322	-6.04473	5.48248e-09	7.63791e-08	9.957
ENSG00000143061.17	chr1	IGSF3	-2.07675	-0.730694	-5.98733	7.46807e-09	1.02073e-07	9.91096
ENSG00000274012.1	chr14	RN7SL2	0.886998	5.52714	6.09899	4.08561e-09	5.80843e-08	9.89895
ENSG00000267361.1	chr17	SEC24AP1	-2.59605	-3.49673	-5.99813	7.04731e-09	9.67072e-08	9.89508
ENSG00000235162.8	chr12	C12orf75	-1.17114	3.83785	-6.05481	5.19175e-09	7.25296e-08	9.86869
ENSG00000272456.1	chr8	AC087045.2	1.22131	-1.43895	5.97653	7.91329e-09	1.0771e-07	9.86254
ENSG00000176490.5	chr19	DIRAS1	-1.66922	1.15735	-5.99551	7.14719e-09	9.80109e-08	9.85661
ENSG00000154258.17	chr17	ABCA9	-2.34419	0.33073	-5.98282	7.65111e-09	1.04423e-07	9.84192
ENSG00000140795.13	chr16	MYLK3	0.862945	-1.06545	5.96973	8.20702e-09	1.11184e-07	9.82219
ENSG00000140451.13	chr15	PIF1	1.06061	2.16161	6.01095	6.57764e-09	9.06948e-08	9.81907
ENSG00000013016.16	chr2	EHD3	0.895832	7.40894	6.08632	4.37688e-09	6.18323e-08	9.79411
ENSG00000253126.1	chr22	IGLVI-56	1.94501	-2.21376	5.95985	8.65254e-09	1.16589e-07	9.77807
ENSG00000188322.5	chr16	SBK1	-0.943609	1.21157	-5.97731	7.88046e-09	1.07408e-07	9.75541
ENSG00000233264.2	chr7	AC006042.3	1.23062	1.13968	5.97328	8.05222e-09	1.09413e-07	9.7225
ENSG00000227242.4	chr1	NBPF13P	-2.92615	-1.64595	-5.94785	9.22616e-09	1.23246e-07	9.71949
ENSG00000188549.12	chr15	CCDC9B	-1.02247	0.851895	-5.95965	8.66195e-09	1.16638e-07	9.68854
ENSG00000268041.2	chr19	AC010616.1	-1.02139	1.28376	-5.96581	8.38105e-09	1.13386e-07	9.68182
ENSG00000244731.8	chr6	C4A	1.77004	0.648273	5.95677	8.7964e-09	1.1814e-07	9.67799
ENSG00000180758.12	chr1	GPR157	-1.15299	1.74306	-5.96582	8.38074e-09	1.13386e-07	9.6457
ENSG00000275896.5	chr7	PRSS2	2.46604	-3.58028	5.94152	9.54325e-09	1.2706e-07	9.62778
ENSG00000123685.9	chr1	BATF3	-0.958025	-0.586458	-5.93116	1.00854e-08	1.33747e-07	9.61808
ENSG00000168758.11	chr2	SEMA4C	1.12251	1.66708	5.95571	8.84643e-09	1.18725e-07	9.58916
ENSG00000163520.14	chr3	FBLN2	-2.49202	1.30161	-5.94396	9.41964e-09	1.25497e-07	9.57629
ENSG00000159714.11	chr16	ZDHHC1	-1.05396	-0.272746	-5.92333	1.0515e-08	1.38896e-07	9.56417
ENSG00000175920.18	chr4	DOK7	1.18832	3.64767	5.99945	6.99738e-09	9.60874e-08	9.56035
ENSG00000151882.11	chr5	CCL28	-1.23903	2.44277	-5.96005	8.6433e-09	1.16543e-07	9.54377
ENSG00000225938.1	chr1	AL109741.1	-1.27219	-0.70305	-5.90891	1.1354e-08	1.48903e-07	9.50708
ENSG00000155660.11	chr7	PDIA4	0.905017	7.49801	6.02872	5.97743e-09	8.29301e-08	9.49009
ENSG00000213145.9	chr14	CRIP1	0.83917	2.873	5.96234	8.53833e-09	1.15205e-07	9.4808
ENSG00000270673.1	chr8	YTHDF3-AS1	0.828674	-0.982391	5.90082	1.18529e-08	1.55042e-07	9.47099
ENSG00000162576.16	chr1	MXRA8	2.0486	-1.65996	5.89834	1.20101e-08	1.56794e-07	9.46869
ENSG00000104833.12	chr19	TUBB4A	-1.77158	1.27323	-5.92242	1.05663e-08	1.39482e-07	9.46154
ENSG00000272870.2	chr4	AC097534.2	0.842013	0.294312	5.91007	1.1284e-08	1.48082e-07	9.4593
ENSG00000213997.3	chrX	PGAM1P7	-1.39543	-0.884345	-5.89774	1.2048e-08	1.57187e-07	9.4567
ENSG00000279555.1	chr17	AC091181.1	1.39155	-0.554661	5.89737	1.20716e-08	1.57291e-07	9.43554
ENSG00000241490.1	chr3	AC093010.2	-1.19249	0.506313	-5.90045	1.18762e-08	1.55247e-07	9.40326
ENSG00000136457.10	chr17	CHAD	-2.01097	0.336931	-5.88447	1.29275e-08	1.67359e-07	9.34171
ENSG00000092200.12	chr14	RPGRIP1	-1.43745	-1.85365	-5.86835	1.40797e-08	1.81342e-07	9.31953
ENSG00000249506.3	chr4	ZEB2P1	-1.09387	-2.06056	-5.86636	1.42284e-08	1.83024e-07	9.30736
ENSG00000246596.7	chr5	AC139795.1	-1.06182	2.57983	-5.91618	1.09232e-08	1.43816e-07	9.29731
ENSG00000168427.9	chr2	KLHL30	1.6032	-0.518267	5.86308	1.44777e-08	1.85756e-07	9.2563
ENSG00000135116.9	chr12	HRK	-1.76043	3.69245	-5.93221	1.00292e-08	1.33091e-07	9.24721
ENSG00000286089.1	chr4	AC095057.4	-1.62252	-2.76439	-5.85851	1.48319e-08	1.89816e-07	9.2463
ENSG00000169896.17	chr16	ITGAM	-0.909973	7.51448	-5.98157	7.70257e-09	1.05054e-07	9.24337
ENSG00000270964.1	chr15	AC016355.1	0.894929	-0.326109	5.86041	1.46831e-08	1.88271e-07	9.23955
ENSG00000121807.5	chr3	CCR2	1.73246	6.17142	5.97714	7.88752e-09	1.07431e-07	9.23845
ENSG00000149418.11	chr11	ST14	-1.29654	6.77351	-5.97594	7.93828e-09	1.07977e-07	9.22799
ENSG00000235831.6	chr3	BHLHE40-AS1	-1.0219	-0.0851047	-5.85898	1.47949e-08	1.89464e-07	9.22693
ENSG00000196154.12	chr1	S100A4	-0.97206	6.3005	-5.96973	8.2072e-09	1.11184e-07	9.20762
ENSG00000262039.1	chr17	AC091180.5	-1.25338	-1.71756	-5.84522	1.59099e-08	2.02582e-07	9.20438
ENSG00000077238.14	chr16	IL4R	-1.17928	6.85556	-5.97087	8.15722e-09	1.1073e-07	9.19171
ENSG00000185433.9	chr21	LINC00158	1.24964	-0.598716	5.84737	1.57301e-08	2.00546e-07	9.18416
ENSG00000138623.10	chr15	SEMA7A	-1.09853	4.9571	-5.95063	9.08984e-09	1.21748e-07	9.18144
ENSG00000154545.16	chrX	MAGED4	-2.0822	-2.94166	-5.83348	1.6926e-08	2.13622e-07	9.11374
ENSG00000251377.1	chr4	AC079340.2	1.53362	-2.45411	5.82714	1.75006e-08	2.20053e-07	9.10849
ENSG00000157514.16	chrX	TSC22D3	0.927827	10.2587	5.95135	9.05481e-09	1.21441e-07	9.10795
ENSG00000253633.1	chr8	AP002852.1	1.40939	-0.232941	5.83337	1.69361e-08	2.13622e-07	9.10237
ENSG00000243710.7	chr1	CFAP57	-1.27614	-1.43267	-5.82352	1.78378e-08	2.24153e-07	9.09391
ENSG00000242861.1	chr1	AL591895.1	-0.840851	2.32914	-5.87089	1.38912e-08	1.79144e-07	9.09118
ENSG00000170049.9	chr17	KCNAB3	-1.51917	0.957394	-5.84156	1.62203e-08	2.06014e-07	9.07618
ENSG00000167634.12	chr19	NLRP7	2.72361	1.04	5.844	1.6013e-08	2.03638e-07	9.04638
ENSG00000279267.1	chr2	AL078621.3	-1.15007	0.824966	-5.83347	1.69272e-08	2.13622e-07	9.04057
ENSG00000258938.1	chr14	AL162311.3	1.25567	-2.89817	5.81564	1.85928e-08	2.33494e-07	9.03965
ENSG00000105327.17	chr19	BBC3	0.883755	4.41847	5.9166	1.08989e-08	1.43591e-07	9.03843
ENSG00000136068.14	chr3	FLNB	-1.02057	5.26854	-5.92551	1.03937e-08	1.37564e-07	9.01867
ENSG00000167964.12	chr16	RAB26	1.26512	-0.0882768	5.81184	1.89673e-08	2.37457e-07	8.98353
ENSG00000284959.1	chr14	AC007262.2	0.950951	-1.55861	5.79479	2.07438e-08	2.57297e-07	8.95132
ENSG00000272255.1	chr5	AC113361.1	-1.02543	-1.04918	-5.79204	2.10451e-08	2.60713e-07	8.92761
ENSG00000196860.8	chr14	TOMM20L	0.855745	-1.01558	5.78438	2.19069e-08	2.7089e-07	8.88715
ENSG00000075340.23	chr2	ADD2	-1.16299	2.83878	-5.84104	1.62651e-08	2.06416e-07	8.87307
ENSG00000169507.9	chr2	SLC38A11	-3.01894	-1.97504	-5.77859	2.25817e-08	2.7872e-07	8.87264
ENSG00000171657.6	chrX	GPR82	-1.79118	-1.21019	-5.7762	2.28656e-08	2.81534e-07	8.85596
ENSG00000154928.18	chr3	EPHB1	-2.60215	-0.639147	-5.77264	2.32955e-08	2.86302e-07	8.82289
ENSG00000067057.17	chr10	PFKP	-0.825709	5.233	-5.88348	1.29952e-08	1.68127e-07	8.80013
ENSG00000105672.14	chr19	ETV2	0.862906	-0.825179	5.76563	2.41648e-08	2.95183e-07	8.78662
ENSG00000221946.7	chr19	FXYD7	-1.60246	0.0340486	-5.77004	2.36144e-08	2.89514e-07	8.77649
ENSG00000258526.6	chr14	AL049828.1	0.816336	-1.8841	5.75731	2.52381e-08	3.07175e-07	8.76869
ENSG00000273855.1	chr15	AC020658.5	-1.37582	-1.64147	-5.75651	2.53449e-08	3.08289e-07	8.76414
ENSG00000253878.5	chr8	AC087752.3	0.839645	0.375119	5.77129	2.34614e-08	2.87813e-07	8.75438
ENSG00000073861.3	chr17	TBX21	-1.36309	2.08228	-5.79482	2.07403e-08	2.57297e-07	8.74008
ENSG00000137831.15	chr15	UACA	-1.25417	-0.13231	-5.75903	2.5013e-08	3.04619e-07	8.72863
ENSG00000260903.3	chr20	XKR7	-1.17844	-1.89125	-5.74815	2.6474e-08	3.20473e-07	8.72377
ENSG00000166676.16	chr16	TVP23A	1.56552	-0.549038	5.74868	2.64006e-08	3.19778e-07	8.68835
ENSG00000167613.16	chr19	LAIR1	-1.08001	3.12843	-5.8112	1.90319e-08	2.3797e-07	8.68457
ENSG00000226942.2	chr16	IL9RP3	-1.43926	0.968412	-5.76242	2.4574e-08	2.99686e-07	8.67132
ENSG00000272155.1	chr8	AC055822.1	-1.15117	-0.112908	-5.7378	2.79417e-08	3.35818e-07	8.61923
ENSG00000080561.13	chrX	MID2	1.7463	1.58503	5.76622	2.40907e-08	2.9446e-07	8.6164
ENSG00000149305.7	chr11	HTR3B	-2.20875	-4.25108	-5.74941	2.63006e-08	3.1895e-07	8.61288
ENSG00000279161.1	chr19	AC093503.3	-2.35574	-4.52266	-5.75344	2.57536e-08	3.12882e-07	8.60485
ENSG00000062524.16	chr15	LTK	-1.08989	2.89632	-5.77744	2.27184e-08	2.79893e-07	8.54809
ENSG00000230945.1	chr9	LINC01507	2.39092	-1.84804	5.70885	3.24789e-08	3.84834e-07	8.52826
ENSG00000115457.10	chr2	IGFBP2	1.77336	-0.448772	5.71516	3.14336e-08	3.73989e-07	8.51755
ENSG00000224565.1	chr20	LINC01754	-1.88188	-1.14974	-5.70734	3.27353e-08	3.86961e-07	8.51413
ENSG00000282988.2	chr6	AL031777.3	1.40453	-0.605783	5.71184	3.19789e-08	3.79355e-07	8.50864
ENSG00000280366.1	chr9	AL161782.1	2.18064	-3.99772	5.70069	3.38838e-08	3.99365e-07	8.42527
ENSG00000178295.15	chr2	GEN1	-1.10172	5.75211	-5.8143	1.87245e-08	2.34855e-07	8.4185
ENSG00000153253.17	chr2	SCN3A	-1.66721	1.23895	-5.71558	3.13645e-08	3.73608e-07	8.4137
ENSG00000261071.1	chr6	AL441883.1	0.987935	-1.26622	5.68544	3.66689e-08	4.28926e-07	8.40438
ENSG00000146776.14	chr7	ATXN7L1	-0.866661	3.98819	-5.77762	2.26965e-08	2.79794e-07	8.39884
ENSG00000255856.2	chr12	AC069503.1	-1.83663	-0.884746	-5.68065	3.75887e-08	4.39175e-07	8.37578
ENSG00000151276.23	chr3	MAGI1	-2.51677	-2.03683	-5.67581	3.854e-08	4.49767e-07	8.36983
ENSG00000232453.6	chr1	AC105277.1	0.964683	-1.54253	5.66628	4.04842e-08	4.69463e-07	8.31767
ENSG00000127920.5	chr7	GNG11	-1.6764	1.89371	-5.702	3.36541e-08	3.9689e-07	8.29195
ENSG00000235505.7	chr11	CASP17P	-1.39701	-0.414104	-5.66698	4.03391e-08	4.68589e-07	8.29071
ENSG00000175874.10	chr2	CREG2	-2.26815	-2.97075	-5.65366	4.32069e-08	4.97977e-07	8.24105
ENSG00000179299.17	chr4	NSUN7	-1.57366	-0.722292	-5.65367	4.32059e-08	4.97977e-07	8.23628
ENSG00000262420.3	chr16	AC007613.1	0.86571	-1.13446	5.65077	4.38565e-08	5.05077e-07	8.23186
ENSG00000184349.13	chr5	EFNA5	2.43073	-4.01277	5.65882	4.20744e-08	4.85943e-07	8.22818
ENSG00000105967.16	chr7	TFEC	-1.07772	2.78837	-5.71234	3.18967e-08	3.78604e-07	8.22337
ENSG00000110092.3	chr11	CCND1	-0.94382	3.0452	-5.71312	3.17682e-08	3.77301e-07	8.2079
ENSG00000147573.17	chr8	TRIM55	2.07965	-4.12683	5.65537	4.28292e-08	4.94377e-07	8.20478
ENSG00000134317.18	chr2	GRHL1	1.61257	-0.33402	5.64845	4.43839e-08	5.10566e-07	8.18708
ENSG00000271109.1	chr19	AC008555.4	-0.890219	2.42911	-5.69411	3.50599e-08	4.1202e-07	8.18199
ENSG00000175928.5	chr3	LRRN1	1.06658	3.98559	5.73854	2.78333e-08	3.34915e-07	8.17502
ENSG00000163563.8	chr1	MNDA	-1.21245	6.04997	-5.76292	2.45101e-08	2.99219e-07	8.16386
ENSG00000176125.5	chr7	UFSP1	1.00659	0.429448	5.64824	4.44308e-08	5.10815e-07	8.13592
ENSG00000188124.3	chr11	OR2AG2	1.74681	-2.86794	5.62828	4.92354e-08	5.58941e-07	8.12979
ENSG00000234546.3	chr1	LNCTAM34A	1.6635	-1.97603	5.62609	4.97919e-08	5.64393e-07	8.1272
ENSG00000166823.5	chr15	MESP1	0.947379	0.208366	5.63904	4.6586e-08	5.33156e-07	8.10941
ENSG00000135373.12	chr11	EHF	2.5742	-1.76079	5.61881	5.16889e-08	5.83922e-07	8.08695
ENSG00000180139.11	chr10	ACTA2-AS1	-1.0581	0.596925	-5.63387	4.784e-08	5.45069e-07	8.06113
ENSG00000272808.4	chr15	AC015712.6	-2.17323	-4.16334	-5.63145	4.84405e-08	5.51247e-07	8.05706
ENSG00000243469.1	chr19	RPL7P51	-2.25671	-3.57683	-5.62113	5.10775e-08	5.77663e-07	8.05579
ENSG00000049089.15	chr1	COL9A2	-1.16226	3.95758	-5.70825	3.25809e-08	3.85588e-07	8.05333
ENSG00000272523.1	chr5	LINC01023	0.803803	-0.313126	5.62139	5.10085e-08	5.77207e-07	8.0516
ENSG00000271392.1	chr17	AC006237.1	-1.40424	-2.87987	-5.61054	5.39263e-08	6.06814e-07	8.04207
ENSG00000126860.11	chr17	EVI2A	0.844293	5.30403	5.73599	2.82064e-08	3.38249e-07	8.03267
ENSG00000226751.2	chr21	AF127936.1	1.11719	1.6151	5.64789	4.45124e-08	5.10878e-07	8.02699
ENSG00000248971.2	chr4	KRT8P46	-1.14949	0.064434	-5.61354	5.31039e-08	5.98229e-07	8.00081
ENSG00000111424.10	chr12	VDR	0.860294	3.05529	5.67717	3.82699e-08	4.46874e-07	7.99982
ENSG00000196155.13	chr16	PLEKHG4	-1.22187	1.62178	-5.63704	4.70677e-08	5.38058e-07	7.9955
ENSG00000250635.1	chr5	CXXC5-AS1	-0.828355	-1.14849	-5.60081	5.66813e-08	6.35683e-07	7.99124
ENSG00000053918.16	chr11	KCNQ1	-1.09029	4.96745	-5.71516	3.14333e-08	3.73989e-07	7.97845
ENSG00000226699.1	chr10	AL360181.1	-1.56791	-2.63779	-5.58608	6.1116e-08	6.81621e-07	7.92964
ENSG00000234141.1	chr7	AC006042.4	0.804232	-0.334831	5.59431	5.86005e-08	6.55018e-07	7.91878
ENSG00000167695.15	chr17	FAM57A	0.933479	2.32359	5.63774	4.68973e-08	5.36415e-07	7.90379
ENSG00000255624.3	chr10	AC073585.1	-0.922247	0.226625	-5.59446	5.85557e-08	6.54881e-07	7.89693
ENSG00000270933.1	chr7	AC010719.1	1.7482	-3.25696	5.57623	6.42696e-08	7.14813e-07	7.87415
ENSG00000274929.1	chr13	AL157813.1	1.37166	-2.85277	5.55758	7.06786e-08	7.81346e-07	7.79389
ENSG00000105982.16	chr7	RNF32	-0.961076	0.488457	-5.57362	6.51315e-08	7.23316e-07	7.77178
ENSG00000111405.9	chr12	ENDOU	1.72971	-1.96046	5.55038	7.33167e-08	8.06083e-07	7.76224
ENSG00000261534.1	chr9	AL596244.1	1.22498	2.07756	5.59898	5.72154e-08	6.41316e-07	7.7285
ENSG00000182870.13	chr12	GALNT9	-3.56649	-1.85252	-5.54255	7.62927e-08	8.36518e-07	7.72731
ENSG00000171747.9	chr19	LGALS4	-1.44198	-0.92215	-5.54066	7.70273e-08	8.43654e-07	7.69349
ENSG00000158301.18	chrX	GPRASP2	0.835689	1.23709	5.56629	6.76126e-08	7.49923e-07	7.67432
ENSG00000229964.1	chr3	AC080129.1	1.29295	0.285247	5.55076	7.3173e-08	8.04943e-07	7.66231
ENSG00000111674.9	chr12	ENO2	0.871308	5.17619	5.66092	4.16216e-08	4.81266e-07	7.66197
ENSG00000171136.6	chr19	RLN3	1.3474	-2.34149	5.52493	8.34297e-08	9.08833e-07	7.64399
ENSG00000260803.1	chr16	Z84723.1	-1.53206	-2.59525	-5.52103	8.50918e-08	9.24936e-07	7.62261
ENSG00000276141.4	chr15	WHAMMP3	-1.04699	0.497261	-5.53997	7.72999e-08	8.4572e-07	7.61606
ENSG00000139132.14	chr12	FGD4	1.20821	3.88594	5.62272	5.06608e-08	5.73595e-07	7.61074
ENSG00000011590.14	chr19	ZBTB32	-0.892686	5.41834	-5.64307	4.56294e-08	5.23101e-07	7.57006
ENSG00000276180.1	chr6	HIST1H4I	0.932818	-0.562914	5.52004	8.552e-08	9.28589e-07	7.56957
ENSG00000196218.12	chr19	RYR1	-1.35044	0.216513	-5.52331	8.4117e-08	9.1533e-07	7.55189
ENSG00000124224.17	chr20	PPP4R1L	-0.81456	3.66256	-5.5979	5.75339e-08	6.44169e-07	7.54164
ENSG00000277075.2	chr6	HIST1H2AE	1.11658	-0.0342938	5.51922	8.58769e-08	9.31459e-07	7.53973
ENSG00000186810.8	chrX	CXCR3	-1.28276	1.9637	-5.54637	7.48237e-08	8.21306e-07	7.51368
ENSG00000250802.7	chr5	ZBED3-AS1	1.02689	-0.399771	5.50428	9.26191e-08	9.98366e-07	7.4845
ENSG00000152939.16	chr5	MARVELD2	1.24715	-1.7191	5.49145	9.88227e-08	1.06101e-06	7.47766
ENSG00000174944.9	chr3	P2RY14	-1.71095	0.174534	-5.50468	9.24334e-08	9.97201e-07	7.46263
ENSG00000255045.1	chr11	AP000866.5	-0.993608	-0.571022	-5.49033	9.93814e-08	1.06531e-06	7.43543
ENSG00000232869.2	chr7	TRBV29-1	-1.69671	-2.51218	-5.47819	1.05652e-07	1.12593e-06	7.42014
ENSG00000143167.12	chr1	GPA33	-1.41286	-1.00838	-5.48285	1.03203e-07	1.10217e-06	7.42003
ENSG00000118985.16	chr5	ELL2	0.996165	6.31113	5.6134	5.31425e-08	5.98329e-07	7.37632
ENSG00000227502.2	chr6	LINC01268	1.41733	0.422637	5.49099	9.90504e-08	1.06289e-06	7.36756
ENSG00000075275.16	chr22	CELSR1	-0.880927	5.67493	-5.60335	5.59489e-08	6.2817e-07	7.35825
ENSG00000275367.1	chr12	AC092111.1	-1.03556	-1.45	-5.46607	1.12301e-07	1.18751e-06	7.35418
ENSG00000270761.1	chr6	AL355353.1	1.24031	-2.13323	5.46344	1.13791e-07	1.19996e-06	7.3514
ENSG00000105255.11	chr19	FSD1	-1.44726	-1.99137	-5.44501	1.24827e-07	1.30948e-06	7.26539
ENSG00000182389.19	chr2	CACNB4	0.942837	0.34241	5.46526	1.12759e-07	1.19095e-06	7.25061
ENSG00000241990.5	chr22	PRR34-AS1	0.842876	0.344754	5.46469	1.13081e-07	1.19372e-06	7.24774
ENSG00000105246.6	chr19	EBI3	1.24283	3.10938	5.52422	8.37274e-08	9.11582e-07	7.23438
ENSG00000272871.1	chr9	AL159169.2	-0.846709	1.12538	-5.47306	1.08416e-07	1.15051e-06	7.23294
ENSG00000135069.14	chr9	PSAT1	1.1272	3.35625	5.52969	8.14401e-08	8.88602e-07	7.23289
ENSG00000267416.1	chr17	AC025048.4	-0.958809	-1.78336	-5.43467	1.31468e-07	1.372e-06	7.2131
ENSG00000145451.13	chr4	GLRA3	1.74731	2.85834	5.51504	8.77117e-08	9.50848e-07	7.21234
ENSG00000267939.1	chr19	AC008946.1	0.897879	-1.66704	5.43456	1.31538e-07	1.37201e-06	7.20804
ENSG00000129810.15	chr3	SGO1	-0.944013	2.23225	-5.48872	1.0019e-07	1.07283e-06	7.20434
ENSG00000266714.9	chr17	MYO15B	-1.79205	5.86969	-5.57025	6.62606e-08	7.35332e-07	7.20241
ENSG00000100122.7	chr22	CRYBB1	1.25424	-1.10082	5.41984	1.41597e-07	1.46404e-06	7.11763
ENSG00000180340.6	chr17	FZD2	-1.11247	0.545746	-5.43627	1.30419e-07	1.36247e-06	7.10915
ENSG00000279182.1	chr22	CR559946.2	1.58965	-2.56388	5.41107	1.47937e-07	1.52256e-06	7.10716
ENSG00000278982.1	chr10	AL139125.1	1.57188	-2.42269	5.4106	1.48282e-07	1.52516e-06	7.10498
ENSG00000241978.9	chr9	AKAP2	-1.36936	-2.6965	-5.40461	1.52777e-07	1.56517e-06	7.07261
ENSG00000111452.13	chr12	ADGRD1	-1.40425	-0.521657	-5.41251	1.46872e-07	1.51303e-06	7.06308
ENSG00000246790.2	chr11	AP000977.1	-1.7068	-3.70499	-5.40402	1.53235e-07	1.56906e-06	7.03165
ENSG00000121743.4	chr13	GJA3	-1.95066	-3.19344	-5.39649	1.5909e-07	1.62571e-06	7.02145
ENSG00000091651.9	chr16	ORC6	0.951475	2.69392	5.46896	1.10677e-07	1.17266e-06	7.01788
ENSG00000128965.13	chr15	CHAC1	1.24096	0.683056	5.41966	1.41719e-07	1.46455e-06	7.01324
ENSG00000141576.16	chr17	RNF157	1.25582	1.48636	5.42699	1.36623e-07	1.41991e-06	6.96822
ENSG00000154134.15	chr11	ROBO3	-1.75403	-1.09215	-5.38609	1.67547e-07	1.70772e-06	6.96624
ENSG00000273196.1	chr2	AC062037.2	-1.58327	-1.37248	-5.3832	1.6997e-07	1.72811e-06	6.96049
ENSG00000164877.19	chr7	MICALL2	0.992485	0.796612	5.40708	1.50907e-07	1.54837e-06	6.93979
ENSG00000142185.16	chr21	TRPM2	-1.29841	4.08656	-5.47784	1.05838e-07	1.12672e-06	6.91163
ENSG00000110811.20	chr12	P3H3	1.0688	2.6558	5.44294	1.26131e-07	1.32247e-06	6.9023
ENSG00000109771.15	chr4	LRP2BP	0.909462	0.119754	5.386	1.67625e-07	1.70772e-06	6.89051
ENSG00000284999.1	chr6	AL591518.1	1.76069	-3.0696	5.36146	1.89352e-07	1.90783e-06	6.87192
ENSG00000163462.18	chr1	TRIM46	-1.41639	-0.0929787	-5.36773	1.83554e-07	1.8522e-06	6.82834
ENSG00000154262.13	chr17	ABCA6	-1.94761	2.51732	-5.41543	1.4475e-07	1.4928e-06	6.80589
ENSG00000256280.1	chr11	AP006289.1	-1.38055	-3.23065	-5.34879	2.01624e-07	2.01634e-06	6.80284
ENSG00000247081.7	chr8	BAALC-AS1	1.5463	-1.54046	5.34803	2.02381e-07	2.02291e-06	6.79606
ENSG00000267702.1	chr18	AP005131.6	-1.28477	-0.358208	-5.3572	1.93396e-07	1.94468e-06	6.79529
ENSG00000154310.17	chr3	TNIK	1.20437	2.84516	5.42313	1.39285e-07	1.4431e-06	6.7782
ENSG00000170128.4	chr1	GPR25	-2.12938	-0.830944	-5.34301	2.07468e-07	2.06351e-06	6.75536
ENSG00000183010.16	chr17	PYCR1	1.06671	3.51339	5.43502	1.31238e-07	1.37031e-06	6.7523
ENSG00000148082.10	chr9	SHC3	-1.51528	-3.1804	-5.33574	2.15068e-07	2.13172e-06	6.74482
ENSG00000181790.11	chr8	ADGRB1	-1.28076	1.7437	-5.38369	1.69564e-07	1.72486e-06	6.74322
ENSG00000223722.3	chr12	AC023157.1	1.42343	-1.02247	5.33812	2.12545e-07	2.10953e-06	6.72957
ENSG00000159403.17	chr12	C1R	1.20704	0.997196	5.36359	1.87367e-07	1.88972e-06	6.71482
ENSG00000223318.1	chr2	RNA5SP111	-1.69515	-5.15362	-5.35271	1.97747e-07	1.98249e-06	6.70451
ENSG00000118200.14	chr1	CAMSAP2	1.3189	2.43286	5.39394	1.61124e-07	1.64482e-06	6.69991
ENSG00000172296.13	chr20	SPTLC3	2.04339	-1.7397	5.3257	2.25997e-07	2.22907e-06	6.69234
ENSG00000234678.2	chr1	ELF3-AS1	1.31309	-2.95304	5.3211	2.31184e-07	2.27466e-06	6.68781
ENSG00000228956.8	chr3	SATB1-AS1	-1.28252	0.418466	-5.34586	2.04571e-07	2.04074e-06	6.68385
ENSG00000122224.18	chr1	LY9	-1.19675	5.82708	-5.46604	1.12315e-07	1.18751e-06	6.67457
ENSG00000226167.1	chr1	AP4B1-AS1	1.4676	-1.72866	5.31954	2.32973e-07	2.29114e-06	6.66703
ENSG00000171357.6	chr1	LURAP1	1.44947	-2.24418	5.31231	2.41414e-07	2.36606e-06	6.6467
ENSG00000126016.15	chrX	AMOT	-0.915481	2.57428	-5.38143	1.71478e-07	1.74168e-06	6.63926
ENSG00000092068.20	chr14	SLC7A8	-1.5058	0.903279	-5.34125	2.09286e-07	2.07953e-06	6.62593
ENSG00000111077.17	chr12	TNS2	1.06691	-0.221624	5.325	2.26781e-07	2.23571e-06	6.62452
ENSG00000132199.20	chr18	ENOSF1	1.22069	4.22075	5.43034	1.34347e-07	1.39915e-06	6.62116
ENSG00000279196.1	chr16	AC135048.4	-1.87204	-3.28304	-5.30757	2.47124e-07	2.41888e-06	6.61502
ENSG00000136404.15	chr15	TM6SF1	-0.839596	1.06922	-5.34314	2.07342e-07	2.06328e-06	6.61316
ENSG00000240184.7	chr5	PCDHGC3	1.59919	0.485462	5.33164	2.1947e-07	2.17215e-06	6.59734
ENSG00000146411.5	chr6	SLC2A12	1.6131	-2.96096	5.29628	2.61227e-07	2.54021e-06	6.57439
ENSG00000280187.1	chr5	AC022107.1	1.08537	-0.693021	5.3067	2.48179e-07	2.42764e-06	6.56417
ENSG00000173585.16	chr3	CCR9	-1.93945	-0.289951	-5.30568	2.49423e-07	2.43863e-06	6.55139
ENSG00000102970.10	chr16	CCL17	2.16372	-2.46935	5.28729	2.73025e-07	2.63863e-06	6.53349
ENSG00000144935.15	chr3	TRPC1	-1.42964	-0.795218	-5.29267	2.65908e-07	2.57976e-06	6.51747
ENSG00000178803.11	chr22	ADORA2A-AS1	1.20729	-1.87455	5.28529	2.75714e-07	2.66206e-06	6.51498
ENSG00000186889.10	chr2	TMEM17	1.28109	-1.76213	5.28618	2.74519e-07	2.65179e-06	6.51496
ENSG00000151150.22	chr10	ANK3	-1.1783	1.09169	-5.31764	2.35156e-07	2.31036e-06	6.50141
ENSG00000116678.19	chr1	LEPR	0.966758	2.29961	5.34788	2.02529e-07	2.02338e-06	6.497
ENSG00000143153.12	chr1	ATP1B1	0.812386	4.48225	5.41052	1.48341e-07	1.52516e-06	6.49633
ENSG00000170819.4	chr3	BFSP2	1.18635	0.120635	5.3011	2.55107e-07	2.48937e-06	6.48479
ENSG00000166086.12	chr11	JAM3	-2.00679	3.49448	-5.36907	1.82338e-07	1.84177e-06	6.47673
ENSG00000162426.14	chr1	SLC45A1	-1.33972	-2.65812	-5.27249	2.93571e-07	2.81557e-06	6.4665
ENSG00000269858.6	chr19	EGLN2	-0.927761	2.71464	-5.34653	2.03888e-07	2.03494e-06	6.44851
ENSG00000144488.15	chr2	ESPNL	-1.19459	2.54707	-5.34391	2.06546e-07	2.05739e-06	6.44715
ENSG00000023171.18	chr11	GRAMD1B	-1.25615	1.86147	-5.32301	2.2901e-07	2.25658e-06	6.4444
ENSG00000065485.20	chr3	PDIA5	0.80285	3.47854	5.36944	1.81998e-07	1.83926e-06	6.44035
ENSG00000234336.6	chr7	JAZF1-AS1	-1.14042	-2.29306	-5.26621	3.02739e-07	2.89522e-06	6.43756
ENSG00000268027.5	chr19	AC243960.1	-0.848759	0.821191	-5.29906	2.57684e-07	2.50956e-06	6.43627
ENSG00000223865.11	chr6	HLA-DPB1	-0.862843	8.59889	-5.41876	1.42356e-07	1.47038e-06	6.41075
ENSG00000141837.19	chr19	CACNA1A	-0.935502	2.31968	-5.32225	2.2988e-07	2.26294e-06	6.38308
ENSG00000279561.2	chr9	AL845472.2	-1.33512	-1.63261	-5.25659	3.17318e-07	3.01844e-06	6.38107
ENSG00000146038.12	chr6	DCDC2	1.97585	-3.99589	5.25718	3.16411e-07	3.01452e-06	6.37002
ENSG00000213671.3	chr17	OLA1P2	2.97293	-2.47129	5.25021	3.2737e-07	3.09549e-06	6.36343
ENSG00000156711.17	chr6	MAPK13	-0.905414	4.46661	-5.37759	1.74779e-07	1.77254e-06	6.35981
ENSG00000226800.5	chr19	CACTIN-AS1	-1.19184	-1.97239	-5.24912	3.29123e-07	3.1106e-06	6.35349
ENSG00000140285.10	chr15	FGF7	1.88027	-3.85502	5.24625	3.33754e-07	3.14403e-06	6.32533
ENSG00000268655.2	chr19	AC008687.4	-1.71897	-3.16281	-5.2421	3.40583e-07	3.20237e-06	6.32117
ENSG00000215218.4	chr5	UBE2QL1	2.02974	-1.16524	5.24828	3.30471e-07	3.11894e-06	6.31341
ENSG00000189007.16	chr6	ADAT2	-0.801634	2.56785	-5.3126	2.41071e-07	2.36386e-06	6.30573
ENSG00000124196.5	chr20	GTSF1L	-1.5065	-2.19314	-5.23655	3.49932e-07	3.28261e-06	6.30113
ENSG00000136231.14	chr7	IGF2BP3	-1.30898	-0.583123	-5.24829	3.30458e-07	3.11894e-06	6.29457
ENSG00000260286.3	chr6	ARMH2	-1.44095	-2.46539	-5.23183	3.58063e-07	3.34486e-06	6.28159
ENSG00000164342.12	chr4	TLR3	1.24356	-2.31425	5.22832	3.64246e-07	3.39789e-06	6.26271
ENSG00000116096.6	chr2	SPR	1.11016	-0.170161	5.24752	3.31706e-07	3.1262e-06	6.25715
ENSG00000077943.8	chr10	ITGA8	1.94072	1.27622	5.27395	2.91474e-07	2.79799e-06	6.25135
ENSG00000100298.15	chr22	APOBEC3H	0.930626	0.165063	5.24785	3.31171e-07	3.12408e-06	6.23756
ENSG00000161682.14	chr17	FAM171A2	-1.12603	0.546262	-5.25054	3.26839e-07	3.09337e-06	6.22752
ENSG00000166405.15	chr11	RIC3	-1.08531	3.92564	-5.3337	2.17238e-07	2.15111e-06	6.21275
ENSG00000255198.4	chr16	SNHG9	0.826775	1.74415	5.26916	2.98399e-07	2.85914e-06	6.19667
ENSG00000177103.14	chr11	DSCAML1	-2.32383	-0.735762	-5.21601	3.8671e-07	3.58891e-06	6.16099
ENSG00000113302.4	chr5	IL12B	-1.51801	-3.10721	-5.20476	4.08422e-07	3.775e-06	6.1549
ENSG00000286122.1	chr8	AC016074.2	1.11689	-1.78207	5.20596	4.06064e-07	3.75493e-06	6.14976
ENSG00000164484.11	chr6	TMEM200A	1.03011	0.115037	5.22669	3.67151e-07	3.42023e-06	6.14257
ENSG00000161298.18	chr19	ZNF382	-0.883525	2.57974	-5.27671	2.87568e-07	2.76722e-06	6.13378
ENSG00000103257.9	chr16	SLC7A5	1.21386	6.77063	5.35841	1.92242e-07	1.93405e-06	6.12081
ENSG00000188848.16	chr4	BEND4	-1.0783	4.50677	-5.32803	2.23414e-07	2.20576e-06	6.11985
ENSG00000128268.12	chr22	MGAT3	0.954274	6.31715	5.35028	2.00141e-07	2.0035e-06	6.08788
ENSG00000110665.11	chr11	C11orf21	-0.986824	4.28256	-5.3141	2.39295e-07	2.34759e-06	6.07238
ENSG00000261126.7	chr18	RBFADN	-1.55075	-2.62333	-5.18499	4.49492e-07	4.1297e-06	6.06973
ENSG00000140678.16	chr16	ITGAX	-1.2254	4.95518	-5.31776	2.35022e-07	2.31017e-06	6.05028
ENSG00000066923.17	chr7	STAG3	-1.2849	3.0629	-5.26609	3.02914e-07	2.89551e-06	6.03412
ENSG00000102678.6	chr13	FGF9	-1.52093	-2.59142	-5.1762	4.69e-07	4.28766e-06	6.03036
ENSG00000156265.15	chr21	MAP3K7CL	-1.11053	4.5508	-5.30753	2.47163e-07	2.41888e-06	6.01639
ENSG00000128872.10	chr15	TMOD2	-0.951092	4.17935	-5.2959	2.6172e-07	2.5428e-06	5.99824
ENSG00000165914.15	chr14	TTC7B	0.942474	1.45845	5.22086	3.77703e-07	3.51203e-06	5.99632
ENSG00000255595.4	chr12	AC007368.1	-1.84971	-4.92814	-5.18743	4.44213e-07	4.08705e-06	5.98886
ENSG00000143507.18	chr1	DUSP10	1.49454	3.96983	5.28112	2.81412e-07	2.71578e-06	5.94024
ENSG00000224389.9	chr6	C4B	1.80146	0.58068	5.19003	4.38652e-07	4.03772e-06	5.93738
ENSG00000108798.9	chr17	ABI3	-0.886355	3.48471	-5.25608	3.1812e-07	3.02364e-06	5.91062
ENSG00000254348.1	chr8	AC120036.3	2.16145	-2.26847	5.14349	5.49117e-07	4.94598e-06	5.87482
ENSG00000179862.6	chr1	CITED4	0.819978	1.95456	5.20657	4.04855e-07	3.74547e-06	5.87328
ENSG00000166897.15	chr22	ELFN2	1.72313	0.994817	5.18491	4.4967e-07	4.1297e-06	5.86325
ENSG00000162543.6	chr1	UBXN10	-1.27596	-1.10199	-5.14524	5.44496e-07	4.90875e-06	5.8522
ENSG00000198467.14	chr9	TPM2	1.33077	1.94394	5.20175	4.14443e-07	3.82713e-06	5.8435
ENSG00000230552.5	chr2	AC092162.2	2.16586	-4.16062	5.13403	5.74665e-07	5.14846e-06	5.81687
ENSG00000232613.6	chr2	LINC02576	1.10273	2.53552	5.20724	4.03544e-07	3.73505e-06	5.80481
ENSG00000073910.21	chr13	FRY	-1.13035	2.25943	-5.19786	4.22331e-07	3.89283e-06	5.80225
ENSG00000260329.1	chr12	AC007541.1	1.22747	-0.933743	5.13663	5.6753e-07	5.09133e-06	5.7911
ENSG00000166741.7	chr11	NNMT	1.98724	-2.99507	5.12272	6.06708e-07	5.40272e-06	5.7909
ENSG00000162913.9	chr1	OBSCN-AS1	-1.13313	-0.233388	-5.13958	5.59524e-07	5.02623e-06	5.77359
ENSG00000144648.16	chr3	ACKR2	-1.21788	-2.69308	-5.1149	6.29861e-07	5.59318e-06	5.75622
ENSG00000205710.4	chr17	C17orf107	0.929685	2.20169	5.18366	4.52384e-07	4.15084e-06	5.74334
ENSG00000100628.11	chr14	ASB2	-1.10701	-0.586578	-5.12717	5.93882e-07	5.3041e-06	5.74329
ENSG00000228835.1	chr18	AC012123.1	0.881759	1.47179	5.16477	4.95617e-07	4.50035e-06	5.72977
ENSG00000144908.13	chr3	ALDH1L1	1.98435	-4.4656	5.11545	6.28224e-07	5.58111e-06	5.71972
ENSG00000253390.1	chr8	AC104561.1	1.07534	-2.24004	5.10452	6.61944e-07	5.85483e-06	5.70358
ENSG00000141469.18	chr18	SLC14A1	-1.23548	2.29558	-5.17439	4.73113e-07	4.32134e-06	5.69862
ENSG00000166342.19	chr18	NETO1	-2.39976	-1.11024	-5.10905	6.47762e-07	5.73948e-06	5.69062
ENSG00000107719.9	chr10	PALD1	1.43193	2.57882	5.18281	4.54263e-07	4.16618e-06	5.68159
ENSG00000237693.4	chr5	IRGM	-1.27378	-2.69902	-5.09793	6.83148e-07	6.01332e-06	5.68082
ENSG00000092964.18	chr8	DPYSL2	-0.888317	4.0566	-5.2165	3.8579e-07	3.58226e-06	5.65902
ENSG00000058668.14	chr1	ATP2B4	-0.841894	5.94741	-5.25419	3.21062e-07	3.04442e-06	5.64842
ENSG00000150347.16	chr10	ARID5B	-0.980894	6.05819	-5.25425	3.20971e-07	3.04442e-06	5.64526
ENSG00000275993.2	chr21	SIK1B	1.25679	6.51602	5.25662	3.17273e-07	3.01844e-06	5.63783
ENSG00000115896.16	chr2	PLCL1	1.16417	0.72157	5.13001	5.85852e-07	5.24401e-06	5.63645
ENSG00000261971.7	chr16	MMP25-AS1	-0.846704	2.28219	-5.15957	5.08207e-07	4.60843e-06	5.62762
ENSG00000227598.1	chr6	Z94721.1	-1.03781	-1.73793	-5.08504	7.26478e-07	6.36689e-06	5.60581
ENSG00000111846.17	chr6	GCNT2	-1.01895	0.0756974	-5.10409	6.6331e-07	5.86176e-06	5.59519
ENSG00000285280.1	chr1	AL390957.1	1.40195	-2.51007	5.07815	7.50727e-07	6.55373e-06	5.5892
ENSG00000127561.15	chr16	SYNGR3	1.07632	2.9867	5.17478	4.7224e-07	4.31533e-06	5.58575
ENSG00000177606.6	chr1	JUN	0.889064	9.48725	5.23586	3.51103e-07	3.29206e-06	5.54557
ENSG00000272858.1	chr22	Z93930.3	0.916158	-1.48188	5.07539	7.60695e-07	6.63211e-06	5.54511
ENSG00000107968.10	chr10	MAP3K8	-1.08988	4.84121	-5.20905	4.00011e-07	3.70405e-06	5.52163
ENSG00000273542.1	chr6	HIST1H4K	0.960772	-1.83942	5.06472	8.00283e-07	6.91734e-06	5.50883
ENSG00000197599.12	chr16	CCDC154	-1.46881	0.665542	-5.09402	6.96021e-07	6.11593e-06	5.49904
ENSG00000241288.7	chr3	LINC02614	-1.23448	-1.84711	-5.05869	8.23565e-07	7.1003e-06	5.49021
ENSG00000166603.5	chr18	MC4R	2.03086	-4.18634	5.05982	8.19155e-07	7.06833e-06	5.48649
ENSG00000276966.2	chr6	HIST1H4E	1.18426	-0.482818	5.07418	7.65071e-07	6.65873e-06	5.48458
ENSG00000132465.11	chr4	JCHAIN	1.55863	11.8503	5.21449	3.89584e-07	3.61249e-06	5.47989
ENSG00000199082.1	chr14	MIR342	-1.26177	-3.14639	-5.051	8.54171e-07	7.33181e-06	5.4718
ENSG00000178538.10	chr8	CA8	-1.62333	-1.13484	-5.06147	8.12738e-07	7.01597e-06	5.47178
ENSG00000159261.11	chr21	CLDN14	2.41453	-3.75232	5.04994	8.58486e-07	7.35412e-06	5.46574
ENSG00000235997.2	chr2	LINC01936	-1.45026	-2.84204	-5.04886	8.62886e-07	7.38239e-06	5.46413
ENSG00000224420.3	chr19	ADM5	-0.899385	1.00357	-5.08946	7.11344e-07	6.2424e-06	5.44563
ENSG00000270149.5	chr1	AL591806.3	-1.56915	-3.04	-5.04411	8.82555e-07	7.54746e-06	5.44257
ENSG00000180530.11	chr21	NRIP1	-1.04582	4.55998	-5.17836	4.64123e-07	4.24694e-06	5.43886
ENSG00000271361.1	chr6	HTATSF1P2	1.20941	0.680831	5.07885	7.48243e-07	6.53653e-06	5.41091
ENSG00000274827.4	chr14	LINC01297	-1.96149	-5.11998	-5.0506	8.55793e-07	7.34042e-06	5.3912
ENSG00000105877.18	chr7	DNAH11	1.00769	-1.8748	5.03452	9.23559e-07	7.86803e-06	5.37978
ENSG00000214050.8	chr8	FBXO16	1.64591	-1.24761	5.0346	9.23207e-07	7.86803e-06	5.35327
ENSG00000240875.5	chr3	LINC00886	0.949387	1.16513	5.07443	7.64149e-07	6.65646e-06	5.34674
ENSG00000154096.13	chr11	THY1	2.27636	-3.95174	5.02259	9.77171e-07	8.2653e-06	5.33503
ENSG00000188596.11	chr12	CFAP54	1.52959	0.321526	5.05337	8.44639e-07	7.26332e-06	5.33375
ENSG00000134548.11	chr12	SPX	0.990496	-0.052532	5.04377	8.83978e-07	7.55121e-06	5.31974
ENSG00000164972.13	chr9	C9orf24	1.08241	-2.24035	5.01688	1.00387e-06	8.46273e-06	5.31355
ENSG00000244671.3	chr22	RN7SL280P	-1.4928	-3.18274	-5.01416	1.01686e-06	8.55432e-06	5.31049
ENSG00000233799.1	chr4	AC139887.1	1.1121	-2.31269	5.01577	1.00914e-06	8.49646e-06	5.30925
ENSG00000257954.1	chr12	AC125611.2	1.0695	-2.82222	5.01277	1.02354e-06	8.60685e-06	5.30531
ENSG00000136010.14	chr12	ALDH1L2	1.54209	2.66448	5.10256	6.68201e-07	5.89463e-06	5.30172
ENSG00000163069.12	chr4	SGCB	-1.01225	2.71511	-5.09829	6.81977e-07	6.00563e-06	5.29143
ENSG00000226377.1	chr17	AC084809.1	0.947497	-1.647	5.01242	1.02522e-06	8.61743e-06	5.27487
ENSG00000242732.4	chrX	RTL5	1.72769	1.53485	5.06665	7.92992e-07	6.86021e-06	5.26709
ENSG00000172197.10	chr6	MBOAT1	-1.42856	1.99001	-5.06878	7.8499e-07	6.80855e-06	5.25459
ENSG00000143341.12	chr1	HMCN1	2.45993	-2.28769	5.00453	1.06411e-06	8.92191e-06	5.25368
ENSG00000196605.7	chr19	ZNF846	-0.822601	2.11393	-5.07312	7.68946e-07	6.68378e-06	5.25268
ENSG00000184731.6	chr2	FAM110C	2.7382	0.0266965	5.03476	9.22538e-07	7.866e-06	5.24967
ENSG00000185483.12	chr1	ROR1	-1.67235	2.98778	-5.09191	7.03057e-07	6.17506e-06	5.24586
ENSG00000099954.18	chr22	CECR2	-1.627	0.45813	-5.03211	9.34187e-07	7.94849e-06	5.2446
ENSG00000280237.3	chr11	MIR4697HG	-1.9135	-2.65921	-4.99655	1.10485e-06	9.23659e-06	5.2348
ENSG00000258458.6	chr14	AL160314.2	0.89832	-1.56643	5.00351	1.06925e-06	8.9576e-06	5.22879
ENSG00000225411.3	chr9	CR786580.1	-1.40242	-3.1896	-4.98837	1.14818e-06	9.57103e-06	5.19815
ENSG00000272574.1	chr1	AL596325.2	1.37948	-1.46904	4.99543	1.1107e-06	9.27779e-06	5.18716
ENSG00000278705.1	chr6	HIST1H4B	1.64577	-2.72084	4.9831	1.17698e-06	9.7626e-06	5.17463
ENSG00000276337.1	chr16	AC105429.1	1.50785	-2.30123	4.98313	1.17682e-06	9.7626e-06	5.16657
ENSG00000108950.12	chr17	FAM20A	1.29246	0.558385	5.01619	1.00718e-06	8.48352e-06	5.13341
ENSG00000100626.17	chr14	GALNT16	1.88167	-4.07967	4.97674	1.21267e-06	1.00215e-05	5.13264
ENSG00000165140.10	chr9	FBP1	1.2355	4.03427	5.10481	6.61036e-07	5.84937e-06	5.11292
ENSG00000254838.5	chr11	GVINP1	-1.12914	6.31721	-5.13932	5.60245e-07	5.03046e-06	5.10038
ENSG00000279846.1	chr15	AC015660.4	1.23449	-1.17148	4.97601	1.21683e-06	1.00435e-05	5.08297
ENSG00000283667.1	chr18	AC009802.1	-1.26822	-3.27555	-4.96144	1.30281e-06	1.06918e-05	5.07988
ENSG00000214274.9	chr14	ANG	0.835082	1.58254	5.02108	9.84167e-07	8.314e-06	5.07176
ENSG00000120318.16	chr5	ARAP3	-1.08503	1.04667	-5.00053	1.08434e-06	9.07645e-06	5.03744
ENSG00000274070.1	chr7	CASTOR2	0.911285	0.165235	4.98067	1.19051e-06	9.8586e-06	5.02102
ENSG00000178965.14	chr1	ERICH3	-2.07661	0.0215771	-4.97637	1.21479e-06	1.00348e-05	5.01698
ENSG00000257924.1	chr12	LINC02416	-1.73197	-3.38264	-4.94282	1.42129e-06	1.15791e-05	4.99827
ENSG00000138172.11	chr10	CALHM2	-0.842841	4.18685	-5.07694	7.55101e-07	6.58619e-06	4.97636
ENSG00000254974.1	chr11	AP001372.4	-1.08326	-2.55779	-4.93644	1.46427e-06	1.18948e-05	4.97055
ENSG00000275302.2	chr17	CCL4	1.44377	2.74119	5.02421	9.69727e-07	8.2127e-06	4.92974
ENSG00000096696.14	chr6	DSP	-3.02455	-0.204558	-4.9496	1.37699e-06	1.12592e-05	4.92276
ENSG00000109944.10	chr11	JHY	-1.44211	1.79637	-4.98738	1.15355e-06	9.59594e-06	4.91169
ENSG00000176293.19	chr19	ZNF135	-1.30296	1.80588	-4.98708	1.1552e-06	9.60568e-06	4.90724
ENSG00000110448.11	chr11	CD5	-1.35023	3.15074	-5.02421	9.69704e-07	8.2127e-06	4.89546
ENSG00000256448.5	chr11	AP000763.3	-1.11418	-0.0518461	-4.94732	1.39177e-06	1.13594e-05	4.895
ENSG00000131019.11	chr6	ULBP3	-0.829278	0.262352	-4.94965	1.37667e-06	1.12592e-05	4.88561
ENSG00000263740.2	chr3	RN7SL4P	0.873413	-0.214412	4.93797	1.45382e-06	1.18202e-05	4.85872
ENSG00000139329.5	chr12	LUM	2.51352	-2.76709	4.90829	1.66923e-06	1.33877e-05	4.84869
ENSG00000085276.18	chr3	MECOM	2.07508	-1.97759	4.90321	1.70902e-06	1.36634e-05	4.80758
ENSG00000144712.12	chr3	CAND2	1.09305	0.836379	4.94712	1.39305e-06	1.13629e-05	4.80712
ENSG00000260005.6	chr17	AC027601.1	-1.58478	0.181079	-4.9296	1.51167e-06	1.22312e-05	4.79803
ENSG00000151208.17	chr10	DLG5	-1.17824	-0.635681	-4.91248	1.63706e-06	1.31552e-05	4.79236
ENSG00000166562.9	chr18	SEC11C	0.800984	6.61583	5.07424	7.6484e-07	6.65873e-06	4.78599
ENSG00000111266.8	chr12	DUSP16	1.28152	0.525196	4.92933	1.51361e-06	1.22421e-05	4.75421
ENSG00000285103.2	chr9	AL451123.1	-1.4461	-2.82722	-4.88463	1.86269e-06	1.47598e-05	4.75163
ENSG00000279611.1	chr19	AC012313.10	-1.30055	-1.00413	-4.89981	1.73619e-06	1.38585e-05	4.74884
ENSG00000137731.14	chr11	FXYD2	-1.81655	-1.93262	-4.88872	1.82774e-06	1.45202e-05	4.74846
ENSG00000275221.1	chr6	HIST1H2AK	0.961539	-1.69866	4.88982	1.81848e-06	1.4458e-05	4.73625
ENSG00000263667.2	chr6	AL035696.3	1.58781	-1.83695	4.88558	1.8545e-06	1.47038e-05	4.71929
ENSG00000240771.7	chr12	ARHGEF25	1.36389	-0.851429	4.89175	1.80228e-06	1.43483e-05	4.69893
ENSG00000260719.1	chr16	AC009133.3	-0.919465	2.2491	-4.95496	1.34291e-06	1.0994e-05	4.69856
ENSG00000156234.7	chr4	CXCL13	2.48874	-1.99092	4.87561	1.94204e-06	1.53134e-05	4.68509
ENSG00000134020.8	chr8	PEBP4	0.829079	0.018905	4.89862	1.74584e-06	1.3919e-05	4.66509
ENSG00000102962.5	chr16	CCL22	1.68864	2.69456	4.96223	1.29803e-06	1.06569e-05	4.64917
ENSG00000139973.16	chr14	SYT16	1.58505	-2.42355	4.86335	2.0551e-06	1.60853e-05	4.64563
ENSG00000272196.2	chr1	HIST2H2AA4	1.01685	-1.8736	4.86286	2.05976e-06	1.61092e-05	4.62785
ENSG00000226320.5	chr3	LINC01811	-1.67233	-4.29063	-4.85961	2.09089e-06	1.63147e-05	4.62139
ENSG00000158683.8	chr7	PKD1L1	-1.02459	-1.06849	-4.86551	2.03478e-06	1.59448e-05	4.60839
ENSG00000145708.11	chr5	CRHBP	1.74534	-0.138964	4.87849	1.9164e-06	1.51528e-05	4.58111
ENSG00000075073.14	chr10	TACR2	0.960922	-1.66972	4.85165	2.16892e-06	1.68516e-05	4.57254
ENSG00000112782.17	chr6	CLIC5	1.55121	0.709734	4.88613	1.84979e-06	1.4678e-05	4.55563
ENSG00000232618.1	chr6	AL355304.1	-0.881347	-0.952692	-4.85086	2.17684e-06	1.68936e-05	4.53507
ENSG00000166866.13	chr12	MYO1A	-1.03683	-1.88619	-4.83882	2.30077e-06	1.77936e-05	4.53242
ENSG00000228624.7	chr6	HDAC2-AS2	-1.05704	-2.61108	-4.83294	2.36376e-06	1.82178e-05	4.52899
ENSG00000185666.14	chr22	SYN3	-1.73319	-4.49069	-4.83799	2.30962e-06	1.78347e-05	4.52737
ENSG00000226571.2	chr6	AL592429.2	-1.44177	2.40259	-4.91489	1.61883e-06	1.30146e-05	4.51158
ENSG00000163531.15	chr1	NFASC	-2.25555	-2.97378	-4.82401	2.46255e-06	1.8878e-05	4.49511
ENSG00000258317.1	chr12	AC034102.6	-1.08791	-2.52965	-4.82358	2.46746e-06	1.89012e-05	4.48664
ENSG00000106714.17	chr9	CNTNAP3	-1.96848	-2.47939	-4.82061	2.50121e-06	1.91306e-05	4.47522
ENSG00000253846.2	chr5	PCDHGA10	1.46364	0.0105209	4.84526	2.23365e-06	1.73078e-05	4.43223
ENSG00000273136.7	chr1	NBPF26	-0.820861	3.17257	-4.92358	1.5547e-06	1.25391e-05	4.43062
ENSG00000231672.6	chr2	DIRC3	-1.69945	-2.72882	-4.80059	2.74114e-06	2.08234e-05	4.39366
ENSG00000106125.14	chr7	MINDY4	1.2875	-3.1156	4.79946	2.75532e-06	2.09074e-05	4.39062
ENSG00000101825.8	chrX	MXRA5	2.20734	-3.52701	4.79183	2.85294e-06	2.15669e-05	4.35988
ENSG00000118849.10	chr3	RARRES1	1.68523	-3.44236	4.7907	2.86767e-06	2.16619e-05	4.35513
ENSG00000135898.10	chr2	GPR55	-1.26563	0.750444	-4.83863	2.30281e-06	1.77957e-05	4.35273
ENSG00000255710.2	chr11	AP003170.1	-1.26343	-1.1376	-4.80474	2.6896e-06	2.04473e-05	4.34611
ENSG00000134532.17	chr12	SOX5	-1.30962	3.27351	-4.90682	1.68062e-06	1.34691e-05	4.34539
ENSG00000285820.1	chr9	AL157829.1	2.12419	-4.98524	4.79555	2.80488e-06	2.12435e-05	4.3441
ENSG00000248347.3	chr8	AC120036.1	2.02261	-4.46159	4.79093	2.86463e-06	2.16471e-05	4.34055
ENSG00000262151.1	chr16	AC133065.1	1.63054	0.208474	4.82895	2.40742e-06	1.85041e-05	4.33888
ENSG00000055118.14	chr7	KCNH2	0.935006	5.93142	4.97006	1.25122e-06	1.0302e-05	4.33011
ENSG00000120093.11	chr17	HOXB3	-1.52627	0.424524	-4.82541	2.44685e-06	1.87719e-05	4.32664
ENSG00000160789.20	chr1	LMNA	1.27967	4.20785	4.92557	1.54033e-06	1.24332e-05	4.29276
ENSG00000148848.14	chr10	ADAM12	-1.20835	-1.8987	-4.78182	2.98602e-06	2.25053e-05	4.29024
ENSG00000157077.14	chr1	ZFYVE9	0.924094	1.96038	4.85139	2.17153e-06	1.68589e-05	4.26002
ENSG00000163958.14	chr3	ZDHHC19	-1.76797	-1.22423	-4.77909	3.02344e-06	2.27617e-05	4.24865
ENSG00000275801.1	chr1	AL121985.3	-1.09903	-0.730785	-4.7849	2.94454e-06	2.22092e-05	4.23295
ENSG00000085465.12	chr1	OVGP1	-0.958001	1.37821	-4.82523	2.44886e-06	1.87802e-05	4.23129
ENSG00000108924.14	chr17	HLF	1.79212	-2.35162	4.76558	3.21488e-06	2.40501e-05	4.23113
ENSG00000144642.21	chr3	RBMS3	2.10309	-1.58419	4.77099	3.13688e-06	2.35365e-05	4.21847
ENSG00000165810.17	chr5	BTNL9	-1.8683	0.292546	-4.79318	2.83545e-06	2.14588e-05	4.19658
ENSG00000163975.12	chr3	MELTF	0.92485	2.11948	4.83863	2.30281e-06	1.77957e-05	4.19061
ENSG00000203814.6	chr1	HIST2H2BF	0.865547	0.775498	4.80017	2.7464e-06	2.08476e-05	4.17198
ENSG00000134909.18	chr11	ARHGAP32	-1.0541	1.79176	-4.82377	2.46528e-06	1.88917e-05	4.16515
ENSG00000176092.15	chr1	CRYBG2	-1.2481	-0.132162	-4.7749	3.08155e-06	2.31645e-05	4.15064
ENSG00000132321.17	chr2	IQCA1	-1.72282	-4.11815	-4.74481	3.53236e-06	2.62011e-05	4.14971
ENSG00000251922.1	chr10	RF00397	-1.03261	-0.689906	-4.7647	3.22783e-06	2.41201e-05	4.14679
ENSG00000006118.14	chr11	TMEM132A	1.64134	1.36251	4.80982	2.62793e-06	2.00087e-05	4.14171
ENSG00000236963.6	chr1	LINC01141	2.03724	-1.17696	4.75595	3.35849e-06	2.49851e-05	4.11988
ENSG00000114739.14	chr3	ACVR2B	0.925261	2.53614	4.83273	2.36605e-06	1.82215e-05	4.10347
ENSG00000213999.16	chr19	MEF2B	1.21884	-2.44638	4.73412	3.70738e-06	2.74085e-05	4.10003
ENSG00000235159.1	chr22	AL121672.2	1.21152	-3.18476	4.72935	3.78813e-06	2.79439e-05	4.09802
ENSG00000006638.11	chr19	TBXA2R	-1.18382	0.322537	-4.77138	3.13138e-06	2.3504e-05	4.09779
ENSG00000042832.12	chr8	TG	0.964891	-0.635302	4.75521	3.36983e-06	2.50602e-05	4.09069
ENSG00000130147.16	chr2	SH3BP4	-1.36537	-0.247098	-4.75969	3.3021e-06	2.46294e-05	4.08998
ENSG00000120885.21	chr8	CLU	1.22584	3.03089	4.84221	2.26519e-06	1.75387e-05	4.0657
ENSG00000112290.13	chr6	WASF1	-1.19411	3.86375	-4.85792	2.10725e-06	1.64168e-05	4.05294
ENSG00000119042.17	chr2	SATB2	1.62248	0.0407901	4.75682	3.34525e-06	2.49051e-05	4.04157
ENSG00000253496.3	chr8	AC011586.2	2.02633	-4.73513	4.71885	3.97188e-06	2.91605e-05	4.03824
ENSG00000222078.1	chr6	RN7SKP110	-1.65242	-3.85371	-4.71554	4.03159e-06	2.95665e-05	4.03726
ENSG00000105810.9	chr7	CDK6	0.919884	5.44837	4.89283	1.79336e-06	1.42865e-05	4.01687
ENSG00000162591.16	chr1	MEGF6	-1.01644	5.26485	-4.88774	1.83612e-06	1.45811e-05	4.01106
ENSG00000168676.11	chr16	KCTD19	-1.54956	-3.43083	-4.70707	4.18823e-06	3.06037e-05	4.00707
ENSG00000103647.12	chr15	CORO2B	2.02506	4.44577	4.87175	1.97698e-06	1.55584e-05	4.00588
ENSG00000162817.7	chr1	C1orf115	-1.63611	0.0421478	-4.73905	3.62575e-06	2.68444e-05	3.98983
ENSG00000187372.11	chr5	PCDHB13	1.50471	-1.96412	4.7096	4.14084e-06	3.02904e-05	3.97899
ENSG00000172771.12	chr3	EFCAB12	-0.935617	0.525181	-4.74389	3.54713e-06	2.6301e-05	3.96072
ENSG00000119139.19	chr9	TJP2	1.16375	-0.703579	4.72309	3.89663e-06	2.86812e-05	3.95895
ENSG00000092345.13	chr3	DAZL	-1.69727	-2.53895	-4.69614	4.39925e-06	3.19716e-05	3.94902
ENSG00000272405.1	chr1	AL365181.3	1.62001	-1.01557	4.71402	4.05933e-06	2.97591e-05	3.9474
ENSG00000152128.13	chr2	TMEM163	1.53461	1.45114	4.76701	3.19413e-06	2.39126e-05	3.94432
ENSG00000279884.1	chr2	AC010894.5	-0.998098	-1.79341	-4.7012	4.30036e-06	3.13434e-05	3.94219
ENSG00000280143.1	chr11	AP000892.3	-1.13363	-0.426199	-4.71091	4.11655e-06	3.01237e-05	3.90137
ENSG00000238057.9	chr2	ZEB2-AS1	-1.02024	-0.751738	-4.70499	4.22768e-06	3.08472e-05	3.89833
ENSG00000123131.13	chrX	PRDX4	0.938217	5.72002	4.86716	2.01931e-06	1.58483e-05	3.88213
ENSG00000237773.6	chr7	AC073332.1	-1.25346	-2.40271	-4.67842	4.76316e-06	3.43928e-05	3.87412
ENSG00000236452.1	chr3	AC123023.1	-1.70479	-3.95031	-4.67359	4.86724e-06	3.50689e-05	3.86433
ENSG00000089558.9	chr17	KCNH4	-1.30047	-0.584533	-4.69688	4.38452e-06	3.18876e-05	3.85263
ENSG00000230747.1	chr2	AC021188.1	-0.994012	-1.60978	-4.67159	4.91086e-06	3.53098e-05	3.81191
ENSG00000178828.7	chr1	RNF186	2.03807	-4.26028	4.65541	5.27902e-06	3.7645e-05	3.79113
ENSG00000279981.1	chr18	AC018445.4	-1.40404	-2.26797	-4.65346	5.32509e-06	3.79065e-05	3.76683
ENSG00000254350.1	chr5	AC091979.1	1.66635	-3.1501	4.64801	5.45611e-06	3.87159e-05	3.76059
ENSG00000186564.5	chr1	FOXD2	-0.989678	-0.789533	-4.67236	4.894e-06	3.52364e-05	3.75861
ENSG00000145700.9	chr5	ANKRD31	-1.37915	-2.87819	-4.64721	5.47555e-06	3.88279e-05	3.75655
ENSG00000118997.14	chr2	DNAH7	1.14091	-2.40083	4.64927	5.42562e-06	3.85403e-05	3.74678
ENSG00000164867.11	chr7	NOS3	0.933131	0.392369	4.69053	4.51131e-06	3.27034e-05	3.7382
ENSG00000105928.15	chr7	GSDME	1.32579	3.42226	4.77909	3.02335e-06	2.27617e-05	3.73256
ENSG00000142192.21	chr21	APP	-1.21213	6.59202	-4.83397	2.35264e-06	1.8139e-05	3.71488
ENSG00000245719.1	chr15	AC009292.1	1.29182	-2.62289	4.63865	5.6882e-06	4.02492e-05	3.71253
ENSG00000100253.13	chr22	MIOX	1.29794	-0.950234	4.65938	5.18643e-06	3.7065e-05	3.7094
ENSG00000136859.10	chr9	ANGPTL2	1.88985	-3.79586	4.63363	5.81669e-06	4.10574e-05	3.70659
ENSG00000169427.8	chr8	KCNK9	1.323	-1.77631	4.64428	5.54751e-06	3.92952e-05	3.69888
ENSG00000228668.1	chr7	TRGV5P	-1.68276	-2.45836	-4.63509	5.77919e-06	4.0849e-05	3.69601
ENSG00000154319.16	chr8	FAM167A	-1.91441	-1.155	-4.64398	5.55504e-06	3.93347e-05	3.67935
ENSG00000067177.15	chrX	PHKA1	1.25946	-0.137816	4.66736	5.00464e-06	3.58918e-05	3.67633
ENSG00000182791.5	chr11	CCDC87	1.26129	-3.13782	4.62719	5.98548e-06	4.20865e-05	3.67557
ENSG00000182742.6	chr17	HOXB4	-1.34794	0.421601	-4.67158	4.9112e-06	3.53098e-05	3.66724
ENSG00000090376.10	chr12	IRAK3	-1.06504	4.22975	-4.77775	3.04193e-06	2.28924e-05	3.65776
ENSG00000198914.3	chr2	POU3F3	-1.83303	-4.37406	-4.62124	6.14585e-06	4.30787e-05	3.64594
ENSG00000140807.7	chr16	NKD1	-1.17833	0.350258	-4.66377	5.08566e-06	3.6434e-05	3.63429
ENSG00000115718.17	chr2	PROC	-1.36827	-3.10178	-4.61379	6.35224e-06	4.43863e-05	3.62379
ENSG00000173801.17	chr17	JUP	-1.20885	5.08304	-4.78802	2.90296e-06	2.19121e-05	3.60533
ENSG00000124343.13	chrX	XG	-1.76626	-3.68038	-4.60496	6.60529e-06	4.59154e-05	3.58949
ENSG00000187824.8	chr17	TMEM220	0.880443	1.90774	4.69332	4.4552e-06	3.23315e-05	3.58503
ENSG00000274536.6	chrX	AL034397.3	-1.07084	2.22962	-4.69747	4.37309e-06	3.18274e-05	3.57307
ENSG00000268093.1	chr19	AC022154.1	-1.16656	-3.30142	-4.60002	6.75145e-06	4.68829e-05	3.56868
ENSG00000147642.17	chr8	SYBU	-1.38529	1.13837	-4.66364	5.08854e-06	3.64416e-05	3.56587
ENSG00000259479.6	chr15	SORD2P	-0.963655	-1.23775	-4.61773	6.24212e-06	4.36775e-05	3.5642
ENSG00000147117.7	chrX	ZNF157	-0.80229	-0.979757	-4.62007	6.17767e-06	4.32716e-05	3.55304
ENSG00000225637.1	chr21	AP001046.1	1.31873	-1.86854	4.60663	6.55683e-06	4.56416e-05	3.54516
ENSG00000229628.1	chr7	AC073115.1	-1.59158	-4.15737	-4.59523	6.89576e-06	4.77861e-05	3.54415
ENSG00000146006.8	chr5	LRRTM2	1.33378	-2.90466	4.59533	6.89266e-06	4.7781e-05	3.54198
ENSG00000183773.15	chr22	AIFM3	-0.87424	0.815792	-4.64932	5.42443e-06	3.85403e-05	3.5302
ENSG00000006747.15	chr7	SCIN	2.07023	-0.355764	4.62692	5.99273e-06	4.21228e-05	3.52285
ENSG00000269970.1	chr9	AL162424.1	-1.31529	-2.43961	-4.58972	7.06548e-06	4.87607e-05	3.51033
ENSG00000285888.1	chr6	Z85996.2	-1.4279	-3.4193	-4.58279	7.28501e-06	5.01212e-05	3.50063
ENSG00000273450.1	chr10	AL139124.1	-0.93737	-2.4418	-4.58727	7.14238e-06	4.9254e-05	3.49963
ENSG00000159556.10	chr15	ISL2	-1.16442	-2.18687	-4.58675	7.1588e-06	4.93371e-05	3.4865
ENSG00000178947.9	chrX	SMIM10L2A	-1.23202	-2.45834	-4.58332	7.26793e-06	5.00378e-05	3.48157
ENSG00000180535.3	chr7	BHLHA15	1.19914	2.2461	4.67684	4.79679e-06	3.46232e-05	3.47381
ENSG00000262691.1	chr16	AC040160.1	-1.59406	-3.67727	-4.57216	7.63389e-06	5.2307e-05	3.45821
ENSG00000008283.16	chr17	CYB561	0.803714	2.85772	4.6935	4.45168e-06	3.23177e-05	3.45318
ENSG00000257052.1	chr11	AP003721.4	1.08829	-1.5986	4.58643	7.16895e-06	4.93902e-05	3.449
ENSG00000112320.12	chr6	SOBP	-1.36031	1.08469	-4.63135	5.87597e-06	4.14177e-05	3.42735
ENSG00000111344.11	chr12	RASAL1	1.58234	2.09663	4.66166	5.13382e-06	3.67397e-05	3.39394
ENSG00000164542.12	chr7	KIAA0895	1.16973	-1.28482	4.57712	7.46927e-06	5.12488e-05	3.39144
ENSG00000237399.7	chr10	PITRM1-AS1	-0.856159	-1.45037	-4.57142	7.65891e-06	5.24416e-05	3.3862
ENSG00000143878.9	chr2	RHOB	0.954505	7.82257	4.76	3.29736e-06	2.46031e-05	3.37274
ENSG00000137878.17	chr15	GCOM1	-1.32326	-1.83054	-4.56071	8.02813e-06	5.47288e-05	3.36446
ENSG00000236114.1	chr10	AL450326.2	-1.38182	-3.35864	-4.54836	8.47504e-06	5.73676e-05	3.3625
ENSG00000261490.1	chr4	AC005674.2	-1.13318	2.65487	-4.66193	5.12764e-06	3.67086e-05	3.36096
ENSG00000185924.7	chr17	RTN4RL1	1.42275	-2.88401	4.54933	8.43902e-06	5.71622e-05	3.35371
ENSG00000227470.1	chr2	AC073415.1	-1.04453	-2.99602	-4.54605	8.56129e-06	5.78735e-05	3.34716
ENSG00000237181.1	chr7	AC147651.4	-0.801944	0.438855	-4.59098	7.02625e-06	4.85233e-05	3.32501
ENSG00000234902.6	chr2	AC007879.3	-1.12318	-2.31363	-4.5426	8.69171e-06	5.86763e-05	3.31368
ENSG00000226549.3	chr17	SCDP1	1.94725	-4.0369	4.53602	8.94556e-06	6.02083e-05	3.31306
ENSG00000279277.2	chr3	AC012020.1	-0.88863	1.49628	-4.61133	6.42187e-06	4.48417e-05	3.2927
ENSG00000099866.15	chr19	MADCAM1	0.862697	-1.41076	4.54876	8.46027e-06	5.72868e-05	3.28184
ENSG00000169908.12	chr3	TM4SF1	1.75866	-3.85559	4.52787	9.26979e-06	6.21826e-05	3.28134
ENSG00000283403.1	chr19	AC005394.2	2.39964	-2.80803	4.53243	9.08697e-06	6.1058e-05	3.28088
ENSG00000117586.11	chr1	TNFSF4	1.06633	2.11543	4.62497	6.04482e-06	4.24593e-05	3.26331
ENSG00000179403.12	chr1	VWA1	1.46238	-1.18445	4.54757	8.50444e-06	5.75472e-05	3.25706
ENSG00000110852.4	chr12	CLEC2B	-0.817127	2.82569	-4.64174	5.61074e-06	3.97151e-05	3.24214
ENSG00000233912.1	chr3	AC026202.2	1.10161	-1.05928	4.54332	8.66417e-06	5.85297e-05	3.2397
ENSG00000158528.12	chr7	PPP1R9A	-1.3683	-1.3446	-4.5349	8.98969e-06	6.04649e-05	3.22883
ENSG00000165695.9	chr9	AK8	-1.4377	-1.79691	-4.52698	9.30589e-06	6.23883e-05	3.22621
ENSG00000188958.9	chr3	UTS2B	-1.19779	0.64834	-4.56903	7.74002e-06	5.28542e-05	3.22077
ENSG00000125844.15	chr20	RRBP1	0.939133	7.19246	4.72381	3.884e-06	2.85987e-05	3.2138
ENSG00000188613.7	chr10	NANOS1	1.23577	-2.72363	4.51412	9.84308e-06	6.54396e-05	3.21002
ENSG00000186417.14	chr15	GLDN	1.63468	-3.55846	4.50783	1.01165e-05	6.71244e-05	3.19824
ENSG00000106538.10	chr7	RARRES2	1.68754	-2.79371	4.50769	1.01224e-05	6.7128e-05	3.18369
ENSG00000072682.18	chr5	P4HA2	1.57137	2.54855	4.6266	6.00132e-06	4.21684e-05	3.1798
ENSG00000227508.6	chr6	LINC01624	-1.46596	-3.34249	-4.50016	1.04596e-05	6.9173e-05	3.1697
ENSG00000117461.15	chr1	PIK3R3	1.11907	0.364169	4.55265	8.3171e-06	5.64313e-05	3.15203
ENSG00000185551.15	chr15	NR2F2	1.73376	-4.05052	4.49381	1.07522e-05	7.09682e-05	3.14591
ENSG00000267554.1	chr17	AC015911.8	-1.34661	-1.78685	-4.50645	1.01774e-05	6.74619e-05	3.14182
ENSG00000233308.1	chr3	OSTN-AS1	-1.47687	-0.744793	-4.51768	9.69137e-06	6.46231e-05	3.12987
ENSG00000229953.1	chr1	AL590666.2	1.46125	-2.00903	4.50027	1.04546e-05	6.91628e-05	3.12341
ENSG00000285165.1	chr7	AC124014.1	-1.1673	-2.93323	-4.48852	1.10021e-05	7.25458e-05	3.11704
ENSG00000228288.6	chr1	PCAT6	0.851885	-0.529832	4.51939	9.61942e-06	6.42071e-05	3.10221
ENSG00000204904.7	chrX	LINC01545	0.928548	-2.81517	4.4861	1.11179e-05	7.32616e-05	3.09948
ENSG00000251661.3	chr11	AC136475.1	-1.02935	-0.540054	-4.5155	9.784e-06	6.51816e-05	3.09692
ENSG00000087842.11	chrX	PIR	1.15939	-2.13547	4.48896	1.09808e-05	7.24293e-05	3.08175
ENSG00000177875.4	chr12	CCDC184	1.30921	-2.12568	4.48815	1.10194e-05	7.26362e-05	3.07701
ENSG00000213557.4	chr9	AC068050.1	-1.7455	-4.05769	-4.47415	1.17086e-05	7.69024e-05	3.06613
ENSG00000180879.13	chrX	SSR4	0.858681	8.07346	4.68651	4.59355e-06	3.32397e-05	3.05424
ENSG00000261959.1	chr17	AC015909.3	-1.64035	-3.46472	-4.46487	1.21883e-05	7.96633e-05	3.0311
ENSG00000050030.15	chrX	NEXMIF	2.05512	1.07919	4.54295	8.67817e-06	5.86046e-05	3.02506
ENSG00000103942.13	chr15	HOMER2	-1.19321	3.10049	-4.59808	6.80939e-06	4.72363e-05	3.0164
ENSG00000259583.2	chr15	AC015712.2	0.855804	0.336387	4.51447	9.82799e-06	6.53839e-05	3.00578
ENSG00000069020.18	chr5	MAST4	-1.34245	2.63434	-4.57137	7.66067e-06	5.24416e-05	2.99497
ENSG00000218713.1	chr6	AL512378.1	-1.3071	-2.9631	-4.4561	1.26585e-05	8.24154e-05	2.98813
ENSG00000272983.1	chr10	AL117339.4	1.07847	-1.59857	4.47296	1.1769e-05	7.72236e-05	2.98328
ENSG00000267733.5	chr18	AP005264.5	-2.26969	-4.14969	-4.44859	1.30753e-05	8.46908e-05	2.96734
ENSG00000179674.3	chr3	ARL14	-1.53786	-4.34476	-4.44803	1.31066e-05	8.48115e-05	2.96178
ENSG00000187033.9	chr3	SAMD7	1.22867	-1.75886	4.45585	1.2672e-05	8.24768e-05	2.93013
ENSG00000064787.13	chr20	BCAS1	1.75913	0.130965	4.4968	1.06134e-05	7.01209e-05	2.92645
ENSG00000011105.14	chr12	TSPAN9	1.43024	1.21329	4.51537	9.78945e-06	6.51907e-05	2.91008
ENSG00000171951.5	chr2	SCG2	-1.24391	-3.31794	-4.43	1.41637e-05	9.07186e-05	2.89206
ENSG00000213420.8	chr7	GPC2	-1.25503	-0.144884	-4.47094	1.18727e-05	7.78534e-05	2.88603
ENSG00000230393.1	chr2	AC092667.1	-1.19508	-2.55196	-4.43333	1.39624e-05	8.96007e-05	2.88467
ENSG00000255222.1	chr11	SETP17	-1.15682	-3.07286	-4.42937	1.42023e-05	9.09369e-05	2.88335
ENSG00000104154.7	chr15	SLC30A4	0.884663	3.43011	4.57905	7.40598e-06	5.08492e-05	2.86695
ENSG00000168646.13	chr17	AXIN2	-1.62272	-0.915048	-4.4514	1.29176e-05	8.37772e-05	2.86381
ENSG00000112299.8	chr6	VNN1	1.0905	1.74389	4.51794	9.68068e-06	6.45731e-05	2.83985
ENSG00000138166.6	chr10	DUSP5	1.11704	6.90265	4.63501	5.78108e-06	4.0849e-05	2.83678
ENSG00000261790.1	chr16	AC005606.2	1.10257	-3.15035	4.41675	1.49923e-05	9.54791e-05	2.83316
ENSG00000198885.9	chr2	ITPRIPL1	-0.877056	1.38669	-4.49494	1.06994e-05	7.06658e-05	2.83285
ENSG00000233577.6	chr22	AL022332.1	-1.36938	-4.20896	-4.41359	1.51964e-05	9.65956e-05	2.8312
ENSG00000112936.18	chr5	C7	2.13666	-2.60079	4.42193	1.46626e-05	9.36168e-05	2.82798
ENSG00000174473.16	chr4	GALNTL6	-1.78822	-2.58829	-4.41729	1.49571e-05	9.53153e-05	2.82474
ENSG00000255366.1	chr8	AC120036.4	2.01979	-0.623853	4.4527	1.28454e-05	8.33628e-05	2.82444
ENSG00000214018.3	chrX	RRM2P3	1.01464	-2.96927	4.41307	1.52302e-05	9.67497e-05	2.81513
ENSG00000279796.1	chr10	AL133384.2	-1.33006	-3.43007	-4.40966	1.54539e-05	9.80162e-05	2.81396
ENSG00000185818.7	chr4	NAT8L	-1.31583	-2.82892	-4.41237	1.52758e-05	9.69477e-05	2.81037
ENSG00000111261.14	chr12	MANSC1	1.12499	-0.24786	4.45284	1.28376e-05	8.3339e-05	2.80612
ENSG00000165409.17	chr14	TSHR	1.35299	-0.0699133	4.45444	1.27493e-05	8.29258e-05	2.79779
ENSG00000285159.1	chr6	AL627422.2	-0.978562	0.703264	-4.47077	1.18811e-05	7.78831e-05	2.79761
ENSG00000283683.1	chr1	MYOCOS	1.51026	-2.70856	4.40876	1.55135e-05	9.83322e-05	2.78186
ENSG00000236946.2	chr12	HNRNPA1P70	1.63134	-1.30438	4.42595	1.44118e-05	9.21905e-05	2.76865
ENSG00000144031.12	chr2	ANKRD53	1.1008	-0.259177	4.43842	1.36605e-05	8.78311e-05	2.75018
ENSG00000136011.15	chr12	STAB2	1.83046	-2.95044	4.39442	1.64945e-05	0.000103994	2.7382
ENSG00000106069.22	chr7	CHN2	-1.49641	-3.23959	-4.38878	1.68956e-05	0.000106356	2.73025
ENSG00000211698.2	chr7	TRGV4	-1.38865	-1.5445	-4.40518	1.57532e-05	9.97887e-05	2.71986
ENSG00000171659.15	chrX	GPR34	-1.24305	1.68578	-4.47404	1.17143e-05	7.69147e-05	2.7166
ENSG00000104921.15	chr19	FCER2	-0.964182	6.81971	-4.6054	6.59269e-06	4.58436e-05	2.71338
ENSG00000034971.17	chr1	MYOC	2.20407	-4.48279	4.37484	1.79293e-05	0.000112266	2.68251
ENSG00000145864.12	chr5	GABRB2	-2.78134	-0.16227	-4.41533	1.50834e-05	9.59383e-05	2.68047
ENSG00000272620.1	chr4	AFAP1-AS1	1.56197	-4.24976	4.37391	1.80001e-05	0.000112569	2.67898
ENSG00000206538.9	chr3	VGLL3	1.86967	-3.7673	4.37193	1.81522e-05	0.000113301	2.66803
ENSG00000274750.2	chr6	HIST1H3E	0.922386	1.17535	4.45362	1.27944e-05	8.3085e-05	2.66107
ENSG00000246465.1	chr16	AC138904.1	-1.30663	-3.03069	-4.3703	1.82787e-05	0.000113852	2.65382
ENSG00000153234.14	chr2	NR4A2	1.37681	6.2651	4.58721	7.14429e-06	4.9254e-05	2.64569
ENSG00000153789.13	chr16	FAM92B	2.02725	-0.0477012	4.417	1.4976e-05	9.54054e-05	2.64475
ENSG00000213901.10	chr2	SLC23A3	-1.11948	-2.53024	-4.37246	1.81119e-05	0.000113128	2.64089
ENSG00000155090.15	chr8	KLF10	0.81319	6.30948	4.58323	7.27079e-06	5.00405e-05	2.62953
ENSG00000128266.9	chr22	GNAZ	-0.812897	3.64126	-4.5202	9.58549e-06	6.40018e-05	2.6149
ENSG00000132688.11	chr1	NES	1.83148	-3.68284	4.35795	1.92624e-05	0.000119168	2.61377
ENSG00000267474.1	chr19	AC008569.2	-1.00442	-1.86636	-4.37401	1.79923e-05	0.000112569	2.6131
ENSG00000272746.1	chr18	AP005131.7	-0.858517	-1.34879	-4.37917	1.76021e-05	0.000110389	2.60857
ENSG00000224271.6	chr22	AL117329.1	1.88493	-3.25228	4.35801	1.92578e-05	0.000119168	2.60652
ENSG00000059804.16	chr12	SLC2A3	-1.02133	6.9405	-4.57763	7.45247e-06	5.11509e-05	2.59414
ENSG00000274737.1	chr12	AC004466.2	1.16339	-1.58373	4.37555	1.7875e-05	0.000111961	2.59407
ENSG00000198106.8	chr16	AC025279.1	0.809199	4.19192	4.53636	8.93212e-06	6.0138e-05	2.58422
ENSG00000165071.14	chr8	TMEM71	-0.836983	4.27531	-4.53421	9.0165e-06	6.06108e-05	2.58252
ENSG00000182985.17	chr11	CADM1	2.18038	1.83983	4.45416	1.27648e-05	8.29999e-05	2.57252
ENSG00000122877.16	chr10	EGR2	-1.0577	2.73954	-4.47437	1.16975e-05	7.68548e-05	2.56765
ENSG00000137942.16	chr1	FNBP1L	-0.841806	0.972518	-4.41922	1.48343e-05	9.45832e-05	2.56458
ENSG00000151012.13	chr4	SLC7A11	1.45993	-1.27578	4.37111	1.82159e-05	0.000113601	2.55582
ENSG00000104901.6	chr19	DKKL1	-1.2532	-2.01832	-4.35631	1.93974e-05	0.000119916	2.55275
ENSG00000100373.10	chr22	UPK3A	-1.01367	-1.72366	-4.35669	1.93661e-05	0.000119773	2.54418
ENSG00000213468.6	chrX	FIRRE	1.05296	-0.291754	4.38562	1.71248e-05	0.000107698	2.53663
ENSG00000260588.1	chr8	AC027702.1	-1.1701	-3.03738	-4.34036	2.07525e-05	0.00012733	2.53467
ENSG00000179776.19	chr16	CDH5	1.63936	-3.33737	4.33839	2.09259e-05	0.000128198	2.5313
ENSG00000103056.12	chr16	SMPD3	-1.196	1.91428	-4.43733	1.37246e-05	8.81871e-05	2.52199
ENSG00000229299.2	chr20	AL121845.1	-1.37354	-2.8206	-4.33359	2.13539e-05	0.000130502	2.50398
ENSG00000077984.6	chr20	CST7	1.01665	2.90258	4.46929	1.19574e-05	7.83063e-05	2.50145
ENSG00000077327.16	chr10	SPAG6	1.21225	-3.40128	4.32958	2.17192e-05	0.000132333	2.49901
ENSG00000158715.6	chr1	SLC45A3	-0.940939	1.01307	-4.40349	1.58676e-05	0.000100418	2.49787
ENSG00000185271.8	chr14	KLHL33	-1.38953	-1.63043	-4.3457	2.0289e-05	0.00012479	2.49731
ENSG00000260615.1	chr13	RPL23AP97	0.932557	-2.77326	4.33232	2.14694e-05	0.000131009	2.49208
ENSG00000216775.3	chr6	AL109918.1	1.01241	2.1082	4.43609	1.37979e-05	8.86296e-05	2.48695
ENSG00000163293.12	chr4	NIPAL1	0.995973	-1.58667	4.34545	2.03105e-05	0.000124884	2.47926
ENSG00000077063.11	chr7	CTTNBP2	-1.42184	-3.86479	-4.32023	2.25925e-05	0.000137197	2.47297
ENSG00000286193.1	chr5	AC025449.2	0.956641	-2.14648	4.33291	2.1416e-05	0.000130763	2.46298
ENSG00000165171.11	chr7	METTL27	-1.54244	-2.96809	-4.31942	2.26696e-05	0.0001375	2.45326
ENSG00000160505.15	chr19	NLRP4	-1.8102	-4.20424	-4.31066	2.35202e-05	0.000142316	2.43675
ENSG00000134955.11	chr11	SLC37A2	-0.842297	4.17476	-4.49429	1.07297e-05	7.08427e-05	2.4337
ENSG00000154645.14	chr21	CHODL	0.927697	-0.710267	4.3507	1.98639e-05	0.00012255	2.43151
ENSG00000204291.11	chr9	COL15A1	1.17425	-2.31102	4.31924	2.26861e-05	0.000137558	2.4222
ENSG00000259881.1	chr16	AC092384.2	-0.95577	-2.20019	-4.31859	2.27483e-05	0.000137894	2.41784
ENSG00000232713.2	chr2	AC010733.1	-0.963909	-2.20904	-4.3174	2.28626e-05	0.000138545	2.4117
ENSG00000259704.1	chr15	AC124248.1	1.31904	-1.61927	4.32816	2.1849e-05	0.000133043	2.40702
ENSG00000205045.9	chr17	SLFN12L	-1.26103	-1.10826	-4.32846	2.18219e-05	0.000132919	2.38958
ENSG00000270069.1	chrX	MIR222HG	-1.15708	0.22633	-4.35465	1.95342e-05	0.000120626	2.38071
ENSG00000267260.1	chr19	AC020928.2	-0.953801	-0.765138	-4.33318	2.13912e-05	0.000130651	2.37797
ENSG00000264148.1	chr17	AC138207.3	0.862442	-2.36065	4.30219	2.43731e-05	0.000147035	2.35659
ENSG00000248734.2	chr5	AC008906.1	-0.930934	-1.18875	-4.30995	2.35909e-05	0.000142701	2.31495
ENSG00000260572.1	chr3	AC069224.1	1.14445	-2.23589	4.2926	2.53736e-05	0.00015234	2.30602
ENSG00000186231.17	chr6	KLHL32	-0.907978	-0.335701	-4.3233	2.23018e-05	0.000135634	2.30382
ENSG00000154065.17	chr18	ANKRD29	2.1006	-0.142041	4.33162	2.15329e-05	0.000131278	2.29383
ENSG00000091972.18	chr3	CD200	-1.02898	4.18147	-4.4591	1.24955e-05	8.14857e-05	2.28832
ENSG00000004660.14	chr17	CAMKK1	-0.825258	2.12332	-4.38212	1.73824e-05	0.000109147	2.28544
ENSG00000170962.13	chr11	PDGFD	1.4234	0.145937	4.33463	2.12605e-05	0.000129971	2.28157
ENSG00000128482.16	chr17	RNF112	-1.34181	-2.71095	-4.27608	2.719e-05	0.000162181	2.27815
ENSG00000184305.15	chr4	CCSER1	-1.52108	-0.801023	-4.29666	2.4945e-05	0.000150134	2.24167
ENSG00000228013.1	chr1	IL6R-AS1	0.98685	-2.0309	4.27594	2.72058e-05	0.000162228	2.2362
ENSG00000187498.16	chr13	COL4A1	1.8616	-3.29469	4.26125	2.89252e-05	0.000171263	2.23582
ENSG00000231682.1	chr2	LINC01891	-1.34232	-3.3546	-4.25883	2.92188e-05	0.00017295	2.2333
ENSG00000198046.12	chr19	ZNF667	-1.48834	-0.922309	-4.28513	2.61798e-05	0.000156713	2.20391
ENSG00000153208.16	chr2	MERTK	1.03378	1.89366	4.35886	1.91884e-05	0.000118856	2.20096
ENSG00000250303.3	chr11	AP002884.1	-0.88019	-0.627671	-4.28748	2.59235e-05	0.000155502	2.18698
ENSG00000280054.1	chr12	AC004241.5	1.25099	-2.30703	4.25831	2.92822e-05	0.000173275	2.18012
ENSG00000230069.3	chr4	LRRC37A15P	-1.06461	-2.5012	-4.24931	3.03997e-05	0.000179098	2.16617
ENSG00000196090.12	chr20	PTPRT	-1.69956	-4.88214	-4.23985	3.16179e-05	0.000185514	2.16509
ENSG00000186854.11	chr2	TRABD2A	-0.843087	1.88801	-4.34679	2.01952e-05	0.000124327	2.16297
ENSG00000224016.2	chr7	AC092681.1	0.823884	-1.95412	4.25426	2.97799e-05	0.000175961	2.14635
ENSG00000262488.1	chr16	AC133065.2	1.52425	1.93251	4.34808	2.00853e-05	0.000123726	2.13697
ENSG00000115380.20	chr2	EFEMP1	1.74444	-4.0036	4.23153	3.27283e-05	0.000191194	2.13688
ENSG00000284734.1	chr1	AC099063.4	1.06473	-1.19826	4.26516	2.84583e-05	0.000168669	2.12682
ENSG00000253549.5	chr8	CA3-AS1	-1.13096	-3.4023	-4.2294	3.3019e-05	0.000192557	2.12299
ENSG00000176697.19	chr11	BDNF	1.97379	-4.32129	4.22587	3.35051e-05	0.000195165	2.11778
ENSG00000261794.1	chr15	GOLGA8H	-1.41369	-2.33212	-4.23749	3.19303e-05	0.000187129	2.11707
ENSG00000105613.10	chr19	MAST1	-0.986245	-2.36967	-4.2371	3.19814e-05	0.000187374	2.1144
ENSG00000160678.11	chr1	S100A1	1.71307	-1.97226	4.24545	3.08916e-05	0.00018173	2.10665
ENSG00000100218.11	chr22	RSPH14	0.908609	-1.3672	4.2541	2.98001e-05	0.000176028	2.10566
ENSG00000270504.1	chr6	AL391422.4	1.21934	-0.754198	4.26526	2.84461e-05	0.000168669	2.09983
ENSG00000196141.14	chr2	SPATS2L	-0.870761	1.56359	-4.3195	2.2662e-05	0.000137495	2.09539
ENSG00000215045.8	chr7	GRID2IP	-0.996521	-0.30376	-4.2698	2.79124e-05	0.0001659	2.09358
ENSG00000164695.5	chr8	CHMP4C	1.46475	-1.36505	4.25129	3.01508e-05	0.000177735	2.09001
ENSG00000164082.15	chr3	GRM2	-1.14712	-0.0981033	-4.27029	2.78548e-05	0.000165656	2.07842
ENSG00000232884.7	chr21	AF127936.2	0.992758	-1.66536	4.24175	3.13703e-05	0.00018433	2.07274
ENSG00000272970.1	chr3	AC107294.2	-1.13441	-2.40303	-4.22403	3.3762e-05	0.000196394	2.06102
ENSG00000161921.15	chr17	CXCL16	-0.817712	4.49406	-4.41112	1.53582e-05	9.74395e-05	2.05776
ENSG00000234222.6	chr1	LIX1L-AS1	0.859665	-2.32593	4.2221	3.40318e-05	0.000197604	2.04406
ENSG00000272398.6	chr6	CD24	-0.804753	8.67226	-4.44565	1.32416e-05	8.55476e-05	2.04329
ENSG00000248810.1	chr4	LINC02432	-1.36982	-1.8357	-4.22733	3.33029e-05	0.000194156	2.03962
ENSG00000227484.1	chr22	CR559946.1	1.31197	-3.15371	4.20775	3.61113e-05	0.000208178	2.02775
ENSG00000152582.14	chr5	SPEF2	1.12246	0.317659	4.2714	2.77266e-05	0.000164991	2.01985
ENSG00000128254.13	chr22	C22orf24	-1.10092	-2.35712	-4.21027	3.57382e-05	0.00020643	2.01231
ENSG00000266893.1	chr19	AC005394.1	2.06283	-4.07105	4.19278	3.84093e-05	0.000220265	1.99337
ENSG00000267121.5	chr17	AC008105.3	-0.950987	4.02176	-4.38247	1.73562e-05	0.000109039	1.99162
ENSG00000137077.8	chr9	CCL21	1.7655	-5.02195	4.19218	3.85041e-05	0.000220645	1.99008
ENSG00000235192.1	chr2	AC009495.3	-1.13265	-1.99442	-4.20935	3.58734e-05	0.000206925	1.98465
ENSG00000286194.1	chr17	AC138207.9	-1.23921	-3.27227	-4.1904	3.87881e-05	0.000222063	1.97352
ENSG00000008311.15	chr7	AASS	1.04138	3.43237	4.36108	1.90086e-05	0.00011796	1.97193
ENSG00000261040.7	chr17	WFDC21P	-1.5395	0.381045	-4.25192	3.00713e-05	0.000177474	1.95939
ENSG00000231705.1	chr10	AL451069.2	1.49494	-2.07964	4.20146	3.70609e-05	0.000213131	1.94973
ENSG00000159231.6	chr21	CBR3	0.804201	1.44758	4.28116	2.66183e-05	0.000159054	1.9384
ENSG00000279858.1	chr8	AC068880.4	-1.49694	-2.48629	-4.18947	3.89356e-05	0.000222737	1.93702
ENSG00000233622.3	chr19	CYP2T1P	-1.30152	-1.02551	-4.21401	3.51898e-05	0.000203682	1.93296
ENSG00000099998.17	chr22	GGT5	1.46474	-2.07443	4.18701	3.93314e-05	0.000224746	1.89499
ENSG00000164283.13	chr5	ESM1	1.79604	-3.25626	4.16967	4.22335e-05	0.000239629	1.88542
ENSG00000128683.14	chr2	GAD1	1.53269	-4.0121	4.16253	4.34867e-05	0.000246323	1.88105
ENSG00000258760.1	chr14	AL355076.2	0.826943	2.37904	4.2968	2.49306e-05	0.000150128	1.87602
ENSG00000207561.1	chr17	MIR635	0.823237	-1.97596	4.17838	4.07518e-05	0.000232203	1.86243
ENSG00000091181.19	chr3	IL5RA	1.73661	0.987225	4.24647	3.07609e-05	0.000181067	1.86124
ENSG00000048462.11	chr16	TNFRSF17	0.994962	4.51819	4.36625	1.85962e-05	0.00011565	1.85651
ENSG00000151650.8	chr10	VENTX	-1.12058	-0.183574	-4.21167	3.55321e-05	0.000205368	1.85291
ENSG00000174807.4	chr11	CD248	0.990219	0.359884	4.22713	3.33311e-05	0.000194242	1.85265
ENSG00000261754.2	chr19	AC008555.1	-0.858392	-0.266312	-4.21042	3.57155e-05	0.000206369	1.85054
ENSG00000143452.16	chr1	HORMAD1	-1.01851	-0.92924	-4.19336	3.83179e-05	0.000219828	1.84521
ENSG00000162337.12	chr11	LRP5	0.827566	4.71153	4.37069	1.82488e-05	0.000113762	1.84062
ENSG00000103485.18	chr16	QPRT	1.01261	2.33846	4.28253	2.64657e-05	0.00015833	1.83647
ENSG00000203799.13	chr6	CCDC162P	-0.974226	-0.730035	-4.19	3.88519e-05	0.000222322	1.81562
ENSG00000076706.17	chr11	AP002956.1	1.16535	0.00915292	4.20218	3.6951e-05	0.000212653	1.791
ENSG00000266274.2	chr17	RN7SL138P	-1.1235	-2.78133	-4.14307	4.70853e-05	0.00026514	1.77918
ENSG00000225193.5	chr15	RPS12P26	-1.1769	-0.897784	-4.1765	4.10669e-05	0.000233668	1.7777
ENSG00000267801.1	chr17	AC087289.6	0.936311	-1.5864	4.16216	4.35524e-05	0.000246625	1.76556
ENSG00000272980.4	chr6	Z94721.2	-1.27721	-1.66268	-4.15734	4.44207e-05	0.000251118	1.7642
ENSG00000071246.11	chr14	VASH1	-0.911307	1.41929	-4.23166	3.27116e-05	0.000191152	1.75734
ENSG00000285730.1	chr6	Z94721.3	-0.869286	-1.05085	-4.16651	4.27834e-05	0.000242544	1.75508
ENSG00000073605.18	chr17	GSDMB	-1.01034	3.29205	-4.29524	2.50937e-05	0.000150839	1.74737
ENSG00000054793.13	chr20	ATP9A	2.1916	1.78078	4.24842	3.05122e-05	0.000179708	1.74584
ENSG00000285755.1	chr2	AC132153.1	-0.9893	-1.80102	-4.14915	4.59317e-05	0.000259006	1.73939
ENSG00000166763.7	chr15	STRCP1	-1.43611	-3.94265	-4.11988	5.17443e-05	0.000288629	1.72629
ENSG00000254944.1	chr11	ATP5PBP5	-1.29507	-1.51617	-4.1471	4.63176e-05	0.000261036	1.72315
ENSG00000229191.1	chr1	AL358473.1	-1.02516	-2.93634	-4.12369	5.09501e-05	0.000284752	1.71104
ENSG00000240204.3	chr7	SMKR1	0.86348	0.263165	4.18732	3.92825e-05	0.000224594	1.7022
ENSG00000183570.16	chr21	PCBP3	-1.20701	-1.74577	-4.1381	4.80491e-05	0.000269887	1.70079
ENSG00000128052.9	chr4	KDR	1.88151	-3.35808	4.11362	5.30746e-05	0.000294906	1.68348
ENSG00000171476.22	chr4	HOPX	-0.999875	0.597345	-4.18692	3.93473e-05	0.000224773	1.67901
ENSG00000164171.11	chr5	ITGA2	-1.7457	-0.697719	-4.15383	4.50626e-05	0.000254461	1.67768
ENSG00000188175.9	chr7	HEPACAM2	1.30281	-1.97351	4.13104	4.94485e-05	0.000277129	1.67611
ENSG00000176320.2	chr1	AL138899.1	-1.48829	-2.63064	-4.1168	5.23939e-05	0.000291808	1.66805
ENSG00000258355.1	chr12	AC079174.1	1.13262	-1.67517	4.13306	4.90447e-05	0.000275096	1.66616
ENSG00000258461.5	chr15	AC012651.1	-1.18741	0.647438	-4.18129	4.02681e-05	0.000229707	1.65159
ENSG00000172250.16	chr22	SERHL	-1.2591	-2.489	-4.10055	5.59591e-05	0.000309482	1.60684
ENSG00000137033.11	chr9	IL33	1.66727	-3.89558	4.08632	5.92715e-05	0.000325299	1.59911
ENSG00000255733.5	chr12	IFNG-AS1	1.47752	1.55648	4.19564	3.79604e-05	0.000217901	1.57762
ENSG00000263934.4	chr17	SNORD3A	0.952035	2.00317	4.2048	3.65538e-05	0.000210548	1.57247
ENSG00000108813.11	chr17	DLX4	-1.04489	-2.31017	-4.09383	5.75015e-05	0.000316967	1.57176
ENSG00000281103.1	chr7	TRG-AS1	-1.01742	2.16813	-4.20178	3.70116e-05	0.000212941	1.55644
ENSG00000254718.6	chr14	AL157756.1	1.03781	-1.88484	4.09922	5.62614e-05	0.000310812	1.55311
ENSG00000074317.11	chr5	SNCB	-1.473	-4.07536	-4.07092	6.30635e-05	0.000343509	1.55043
ENSG00000174788.10	chr19	PCP2	-0.851519	-0.529896	-4.12248	5.12011e-05	0.000285916	1.53783
ENSG00000274214.1	chr18	AP005212.2	-1.3305	-3.18465	-4.07293	6.25568e-05	0.000341189	1.53663
ENSG00000154165.5	chr3	GPR15	-1.5856	0.0826611	-4.13054	4.95511e-05	0.000277627	1.52367
ENSG00000137965.11	chr1	IFI44	0.858682	3.01283	4.23402	3.23929e-05	0.00018962	1.52125
ENSG00000154127.10	chr11	UBASH3B	-0.866424	4.50622	-4.27379	2.74515e-05	0.000163596	1.51694
ENSG00000188130.14	chr22	MAPK12	1.05792	1.04448	4.15721	4.44439e-05	0.000251179	1.50196
ENSG00000274641.1	chr6	HIST1H2BO	1.33269	-2.23666	4.07448	6.21672e-05	0.000339249	1.48657
ENSG00000112175.8	chr6	BMP5	1.90232	-3.81965	4.05299	6.77721e-05	0.000366556	1.47441
ENSG00000182240.16	chr21	BACE2	-1.0026	6.01395	-4.29806	2.47985e-05	0.000149377	1.47257
ENSG00000243066.3	chr19	RN7SL842P	-1.18233	-1.0308	-4.09313	5.76633e-05	0.000317598	1.4686
ENSG00000162843.17	chr1	WDR64	1.33453	-1.51236	4.07727	6.14722e-05	0.000336094	1.44384
ENSG00000159713.11	chr16	TPPP3	-0.974779	-1.19942	-4.08127	6.04892e-05	0.000331259	1.44186
ENSG00000125531.7	chr20	FNDC11	-0.850278	1.19281	-4.14066	4.75498e-05	0.000267381	1.43815
ENSG00000269043.1	chr19	AC008554.2	1.59734	-4.05393	4.03672	7.23327e-05	0.000388405	1.42181
ENSG00000115112.8	chr2	TFCP2L1	-1.42769	-1.88304	-4.05847	6.62982e-05	0.000359647	1.41365
ENSG00000229914.1	chr1	AL138899.2	-1.43095	-2.82948	-4.044	7.02569e-05	0.000378368	1.41276
ENSG00000003436.16	chr2	TFPI	1.17881	-1.77191	4.06426	6.47767e-05	0.000352057	1.41246
ENSG00000211899.10	chr14	IGHM	0.902528	14.5658	4.26512	2.8462e-05	0.000168669	1.40666
ENSG00000171695.10	chr20	LKAAEAR1	0.947569	-2.1485	4.0527	6.785e-05	0.000366878	1.40125
ENSG00000196632.10	chrX	WNK3	-1.61999	-3.59134	-4.02956	7.4429e-05	0.000398492	1.39137
ENSG00000254787.1	chr11	AP001825.1	-1.5702	-3.78036	-4.02686	7.52367e-05	0.000402068	1.38581
ENSG00000145623.13	chr5	OSMR	1.88099	-3.49544	4.03065	7.41063e-05	0.000397187	1.38527
ENSG00000225217.1	chr1	HSPA7	-1.14184	4.17286	-4.23041	3.28814e-05	0.000191866	1.36604
ENSG00000115604.10	chr2	IL18R1	-1.04898	0.255515	-4.09361	5.75513e-05	0.000317068	1.36431
ENSG00000092969.12	chr1	TGFB2	-1.32232	-2.83855	-4.02758	7.50204e-05	0.000401232	1.36001
ENSG00000215529.12	chr20	EFCAB8	-1.15972	-2.82853	-4.02876	7.46671e-05	0.00039966	1.35964
ENSG00000141096.5	chr16	DPEP3	-1.04489	-0.425262	-4.07405	6.22757e-05	0.000339748	1.35315
ENSG00000256940.1	chr11	AP001453.2	1.04911	-2.97313	4.02308	7.63784e-05	0.00040752	1.34157
ENSG00000113594.10	chr5	LIFR	1.84063	-3.24998	4.02143	7.68815e-05	0.000409987	1.33934
ENSG00000240531.1	chr17	RPL21P123	-1.11946	-2.81749	-4.02444	7.59646e-05	0.000405527	1.33893
ENSG00000279255.1	chr16	Z97653.2	1.13834	-3.35282	4.01806	7.79198e-05	0.000414647	1.33606
ENSG00000146666.5	chr7	LINC00525	2.06651	1.31804	4.12419	5.08462e-05	0.00028425	1.3258
ENSG00000197653.15	chr12	DNAH10	-0.954508	-0.886981	-4.05138	6.82112e-05	0.000368535	1.30974
ENSG00000145685.14	chr5	LHFPL2	-1.01466	3.25256	-4.17768	4.08696e-05	0.000232678	1.30525
ENSG00000115596.4	chr2	WNT6	-0.979165	-0.0637479	-4.06906	6.35368e-05	0.000345785	1.29425
ENSG00000188452.14	chr2	CERKL	1.25002	-1.40346	4.04122	7.10436e-05	0.000381992	1.29269
ENSG00000196263.8	chr19	ZNF471	-1.62046	-0.490459	-4.05527	6.71557e-05	0.000363613	1.29185
ENSG00000154153.13	chr5	RETREG1	-0.814521	1.55777	-4.11299	5.32113e-05	0.000295502	1.27899
ENSG00000198353.8	chr12	HOXC4	-0.94794	2.63064	-4.14161	4.73667e-05	0.0002665	1.25119
ENSG00000200788.1	chr9	RF00019	-1.061	-3.47324	-3.99155	8.65714e-05	0.000454438	1.24807
ENSG00000200629.1	chr7	RNY1P11	-1.23777	-2.9396	-3.9942	8.56668e-05	0.00045063	1.23801
ENSG00000036448.10	chr8	MYOM2	-1.26539	-1.36266	-4.01852	7.77782e-05	0.00041422	1.23245
ENSG00000266976.2	chr19	AC079466.1	2.64756	-2.65745	3.99864	8.41719e-05	0.00044381	1.21987
ENSG00000087245.13	chr16	MMP2	1.59372	-3.15658	3.98832	8.76864e-05	0.000459691	1.21786
ENSG00000197928.10	chr19	ZNF677	-1.16669	2.20887	-4.11242	5.33339e-05	0.000296102	1.21021
ENSG00000264215.1	chr17	AC126365.1	1.88374	-3.58999	3.98005	9.06012e-05	0.000473369	1.20768
ENSG00000041982.16	chr9	TNC	2.25318	-1.55448	4.01432	7.90889e-05	0.0004202	1.20527
ENSG00000077942.19	chr22	FBLN1	1.62875	-2.94024	3.98681	8.82094e-05	0.000462193	1.20176
ENSG00000268758.7	chr19	ADGRE4P	-1.85777	-2.03765	-3.99758	8.45265e-05	0.000445446	1.20063
ENSG00000270022.3	chr22	Z93241.1	1.08582	-2.49193	3.99092	8.67861e-05	0.000455446	1.1995
ENSG00000163568.15	chr1	AIM2	-0.903137	5.57137	-4.22379	3.37947e-05	0.000196511	1.19897
ENSG00000285480.1	chr7	AC021097.2	-0.976868	-2.07356	-3.99716	8.46681e-05	0.000445959	1.19661
ENSG00000131044.17	chr20	TTLL9	-1.33256	-3.26623	-3.96982	9.4334e-05	0.000490707	1.16597
ENSG00000198753.12	chrX	PLXNB3	1.2222	-0.851415	4.01594	7.85818e-05	0.000417726	1.16375
ENSG00000182195.7	chrX	LDOC1	-1.22246	0.416909	-4.04495	6.9991e-05	0.000377037	1.15825
ENSG00000124107.5	chr20	SLPI	1.34896	-0.961727	4.01098	8.0146e-05	0.000425143	1.15391
ENSG00000272068.1	chr1	AL365181.2	1.41653	-3.12197	3.96753	9.5191e-05	0.000494526	1.14895
ENSG00000181392.16	chr19	SYNE4	-1.14305	-1.46503	-3.99583	8.51161e-05	0.00044785	1.14719
ENSG00000179855.7	chr19	GIPC3	-1.11101	-1.07833	-4.0003	8.36205e-05	0.000441898	1.14077
ENSG00000151575.14	chr15	TEX9	-0.970748	1.02524	-4.05018	6.85395e-05	0.000369911	1.12192
ENSG00000205038.12	chr8	PKHD1L1	1.09377	3.78953	4.15741	4.44065e-05	0.000251109	1.11277
ENSG00000183850.14	chr19	ZNF730	-1.1611	-1.68765	-3.97826	9.12447e-05	0.000476361	1.11058
ENSG00000196074.13	chr20	SYCP2	-1.0777	0.839836	-4.0418	7.08785e-05	0.000381308	1.10584
ENSG00000151090.18	chr3	THRB	1.71981	0.416452	4.03769	7.2051e-05	0.000387202	1.09698
ENSG00000229689.3	chr2	AC009237.3	-0.97375	-2.05613	-3.96877	9.47281e-05	0.000492503	1.09089
ENSG00000273724.1	chr16	AC106782.5	-0.940606	-2.16382	-3.9635	9.67134e-05	0.000501658	1.08475
ENSG00000122025.14	chr13	FLT3	-1.02289	2.02881	-4.07023	6.32388e-05	0.00034435	1.08354
ENSG00000100154.14	chr22	TTC28	0.974048	3.10588	4.12159	5.13852e-05	0.000286865	1.07661
ENSG00000274184.1	chr18	AC011815.2	-1.21154	-3.66691	-3.93902	0.000106481	0.000546793	1.06855
ENSG00000075035.10	chr12	WSCD2	-1.49059	2.61229	-4.09026	5.83369e-05	0.000320957	1.06024
ENSG00000162745.10	chr1	OLFML2B	1.11003	-1.05401	3.98235	8.97821e-05	0.000469334	1.05539
ENSG00000165548.11	chr14	TMEM63C	-0.804086	-0.122526	-4.00009	8.36903e-05	0.000441965	1.0504
ENSG00000152583.12	chr4	SPARCL1	1.78444	-3.52864	3.93114	0.000109817	0.000561527	1.03025
ENSG00000161940.10	chr17	BCL6B	-1.15453	-1.20054	-3.96411	9.6483e-05	0.000500593	1.02042
ENSG00000162458.13	chr1	FBLIM1	1.46535	-3.95597	3.91975	0.000114817	0.000584715	1.00393
ENSG00000204301.6	chr6	NOTCH4	-0.803867	-1.01981	-3.965	9.61459e-05	0.000499101	1.00146
ENSG00000242094.1	chr3	FOXP1-IT1	1.09527	-1.5723	3.95402	0.000100389	0.000518323	0.992855
ENSG00000123610.5	chr2	TNFAIP6	0.993915	-1.59878	3.95346	0.00010061	0.000519328	0.990611
ENSG00000232022.7	chr1	FAAHP1	-1.18593	-3.58312	-3.91588	0.000116565	0.000592643	0.986896
ENSG00000233154.5	chr1	LINC01762	-1.0915	-3.32779	-3.91835	0.000115449	0.000587637	0.984526
ENSG00000258405.10	chr19	ZNF578	-1.3275	-0.448037	-3.97238	9.33858e-05	0.00048653	0.983693
ENSG00000112964.14	chr5	GHR	1.52387	-4.46369	3.90677	0.000120781	0.00061153	0.969495
ENSG00000229422.2	chr9	AL512625.2	-1.13811	-2.00587	-3.93384	0.000108662	0.000556469	0.963327
ENSG00000267325.1	chr18	LINC01415	-0.95701	-0.282242	-3.97152	9.37028e-05	0.000487676	0.962588
ENSG00000137877.10	chr15	SPTBN5	-1.1752	-0.0737412	-3.9719	9.35652e-05	0.000487212	0.944641
ENSG00000185130.5	chr6	HIST1H2BL	1.19444	-2.88615	3.91292	0.000117921	0.000598406	0.938385
ENSG00000279943.1	chr4	AC110771.1	1.01273	-2.91965	3.90942	0.000119539	0.000606157	0.927785
ENSG00000230091.6	chr10	TMEM254-AS1	-0.879081	-0.974581	-3.9345	0.000108381	0.000555311	0.883489
ENSG00000163710.9	chr3	PCOLCE2	1.45099	-2.35678	3.90518	0.000121531	0.000614556	0.875737
ENSG00000274776.1	chr18	AC090241.3	-0.91704	-2.85995	-3.89236	0.00012774	0.000642082	0.870408
ENSG00000261786.1	chr3	AC006058.1	-1.97756	-3.0798	-3.88739	0.000130231	0.000653098	0.865392
ENSG00000197253.13	chr16	TPSB2	1.62262	-3.77836	3.87814	0.000134985	0.000674119	0.855261
ENSG00000261770.1	chr19	AC006504.1	-0.914514	0.0632107	-3.95304	0.000100777	0.000519788	0.849417
ENSG00000145850.9	chr5	TIMD4	1.18739	2.96424	4.05829	6.63465e-05	0.000359812	0.848323
ENSG00000181626.11	chr18	ANKRD62	-1.97798	-3.9618	-3.86832	0.000140212	0.000697214	0.83115
ENSG00000260729.1	chr15	AC009690.1	-1.18905	-1.89867	-3.89932	0.000124334	0.000627311	0.829406
ENSG00000171794.4	chr10	UTF1	-1.04325	-2.27339	-3.89135	0.000128245	0.000644456	0.82767
ENSG00000115414.19	chr2	FN1	1.64758	-1.53863	3.90922	0.000119631	0.000606454	0.820443
ENSG00000140511.11	chr15	HAPLN3	-0.849813	0.36593	-3.94974	0.000102095	0.000526317	0.813894
ENSG00000270972.1	chr11	AC136475.9	-1.1314	-3.18462	-3.87083	0.00013886	0.000691242	0.812746
ENSG00000074276.10	chr5	CDHR2	-0.895407	-2.24498	-3.88457	0.000131663	0.000659004	0.806009
ENSG00000204186.9	chr2	ZDBF2	-0.858555	-0.736513	-3.91837	0.000115441	0.000587637	0.804371
ENSG00000142627.13	chr1	EPHA2	1.14954	-2.32642	3.87797	0.000135074	0.0006744	0.783025
ENSG00000243566.6	chr7	UPK3B	-1.23972	-2.34551	-3.87515	0.000136555	0.000680947	0.780563
ENSG00000169744.13	chr4	LDB2	1.25709	-3.62101	3.85538	0.000147392	0.000728849	0.769177
ENSG00000182492.16	chrX	BGN	1.7504	-3.38745	3.85931	0.000145177	0.000719135	0.766319
ENSG00000142871.17	chr1	CCN1	1.46713	-3.47843	3.856	0.000147039	0.000727284	0.766173
ENSG00000270006.2	chr16	AC010531.6	0.913453	-2.98885	3.86216	0.000143587	0.000712309	0.766082
ENSG00000228109.1	chr3	MELTF-AS1	1.03081	-0.510105	3.91442	0.000117233	0.000595662	0.75843
ENSG00000094963.14	chr1	FMO2	1.73647	-3.4237	3.85339	0.000148527	0.000733923	0.749704
ENSG00000221947.7	chr8	XKR9	1.13113	-1.43323	3.88795	0.000129947	0.000652034	0.744181
ENSG00000152495.11	chr5	CAMK4	-0.837437	2.33098	-3.99597	8.50694e-05	0.000447838	0.741022
ENSG00000189060.5	chr22	H1F0	1.0973	4.49582	4.07449	6.21661e-05	0.000339249	0.740108
ENSG00000112769.19	chr6	LAMA4	1.69508	-3.83613	3.84229	0.000155009	0.000761754	0.728754
ENSG00000233593.9	chr1	LINC02609	1.30799	-3.29571	3.83665	0.000158407	0.000776451	0.69295
ENSG00000227394.1	chr2	AC007386.1	-1.14093	-2.52174	-3.84127	0.000155617	0.000763891	0.668586
ENSG00000267491.1	chr17	AC100788.1	-1.28682	-1.95483	-3.85057	0.000150151	0.000741037	0.660841
ENSG00000163638.13	chr3	ADAMTS9	1.49432	-4.40678	3.81662	0.000171044	0.000831312	0.657983
ENSG00000277157.1	chr6	HIST1H4D	1.03382	-2.84648	3.82791	0.000163805	0.000799796	0.637102
ENSG00000167578.18	chr19	RAB4B	-0.837271	1.09659	-3.92042	0.000114517	0.000583484	0.621002
ENSG00000155970.12	chr8	MICU3	-1.5341	0.906608	-3.90484	0.00012169	0.000615202	0.600785
ENSG00000129009.13	chr15	ISLR	1.6883	-4.10912	3.80228	0.000180671	0.000872411	0.599834
ENSG00000217275.2	chr6	AL031777.1	1.0234	-2.71677	3.81892	0.000169545	0.000825019	0.59424
ENSG00000211641.3	chr22	IGLV11-55	1.29635	-3.15915	3.81033	0.000175203	0.000849266	0.593831
ENSG00000130649.10	chr10	CYP2E1	0.996869	-0.963888	3.85315	0.000148666	0.000734249	0.583329
ENSG00000211771.1	chr7	TRBJ2-7	-1.03783	-1.57799	-3.83482	0.000159523	0.000780972	0.577688
ENSG00000235802.1	chrX	HCFC1-AS1	0.965732	-2.98271	3.80483	0.000178922	0.000865004	0.567058
ENSG00000175556.16	chrX	LONRF3	-1.14483	-1.27193	-3.83611	0.000158732	0.000777666	0.563454
ENSG00000260911.2	chr16	AC135050.3	-1.2189	-2.12242	-3.81802	0.000170127	0.000827052	0.559409
ENSG00000002726.20	chr7	AOC1	1.64046	-1.09736	3.84215	0.000155094	0.000761841	0.55569
ENSG00000203995.9	chr1	ZYG11A	-1.34488	-2.8877	-3.8005	0.000181897	0.000877686	0.551944
ENSG00000166068.13	chr15	SPRED1	0.971998	3.08225	3.97951	9.07944e-05	0.000474133	0.551251
ENSG00000064886.14	chr1	CHI3L2	-1.02713	1.41026	-3.90887	0.000119796	0.000607001	0.549215
ENSG00000232732.10	chr2	AC097717.1	0.918263	-1.50683	3.83028	0.000162328	0.000793353	0.543994
ENSG00000143512.13	chr1	HHIPL2	-1.20356	-2.85019	-3.79803	0.000183624	0.000884337	0.541376
ENSG00000122786.20	chr7	CALD1	1.16771	-0.511084	3.85422	0.000148053	0.000731759	0.53704
ENSG00000196335.13	chr7	STK31	-0.94212	-2.28462	-3.80366	0.000179725	0.000868472	0.524371
ENSG00000279673.1	chr3	AC092919.2	1.09976	-1.96124	3.81366	0.00017299	0.000839554	0.522198
ENSG00000285589.1	chr19	AC010422.8	-1.00616	1.6156	-3.90554	0.000121361	0.000613849	0.503692
ENSG00000168542.14	chr2	COL3A1	1.87081	-3.13275	3.78524	0.000192774	0.000923984	0.497337
ENSG00000106571.14	chr7	GLI3	1.41742	-3.83878	3.77181	0.000202853	0.00096517	0.49328
ENSG00000232807.2	chr10	AL137186.2	0.837343	-1.59343	3.81016	0.000175318	0.000849621	0.486251
ENSG00000146477.6	chr6	SLC22A3	1.64213	-4.14856	3.76714	0.000206471	0.000980299	0.484006
ENSG00000006071.13	chr11	ABCC8	-1.7966	-3.44161	-3.77164	0.000202984	0.000965567	0.481733
ENSG00000246528.3	chr8	AC079089.1	-1.39231	-3.07926	-3.77265	0.000202212	0.000962575	0.470893
ENSG00000184005.11	chr1	ST6GALNAC3	-0.856663	-0.631669	-3.82556	0.000165289	0.000806261	0.463666
ENSG00000261360.1	chr5	AC010491.1	0.877158	-2.78347	3.77852	0.000197759	0.000945178	0.461361
ENSG00000061676.15	chr2	NCKAP1	0.903836	-1.13392	3.81426	0.000172593	0.000837829	0.459674
ENSG00000196408.11	chr16	NOXO1	0.860079	-2.20375	3.78896	0.000190071	0.000911896	0.458277
ENSG00000285454.1	chr4	AC111006.1	-0.962484	-1.23058	-3.80596	0.000178152	0.000861902	0.447394
ENSG00000131037.15	chr19	EPS8L1	-1.00872	-1.53885	-3.7958	0.000185191	0.000890605	0.442371
ENSG00000144061.12	chr2	NPHP1	-0.830095	-0.388155	-3.82299	0.000166925	0.000813649	0.433577
ENSG00000242290.2	chr3	ZBTB20-AS5	0.830268	-1.04505	3.80662	0.000177707	0.000859954	0.418794
ENSG00000280303.2	chr8	ERICD	0.898503	-2.32754	3.77472	0.000200633	0.000955737	0.415556
ENSG00000155749.12	chr2	ALS2CR12	-0.870649	-1.19721	-3.7978	0.000183779	0.000884661	0.415477
ENSG00000254528.7	chr11	AP000757.1	-1.07376	-3.74215	-3.74913	0.000221014	0.00104003	0.409163
ENSG00000251667.1	chr5	BRCC3P1	-0.944361	-2.02259	-3.77549	0.000200044	0.000953831	0.408303
ENSG00000114698.15	chr3	PLSCR4	1.13535	-2.26701	3.77071	0.000203706	0.000968541	0.402052
ENSG00000251728.1	chr7	RF00019	-0.884539	-1.6363	-3.78259	0.000194729	0.000932023	0.400824
ENSG00000283202.1	chr2	AC010149.2	0.925419	-2.30387	3.77041	0.000203936	0.000969407	0.398263
ENSG00000254876.5	chr9	SUGT1P4-STRA6LP	-0.985468	-1.00678	-3.79852	0.00018328	0.000882895	0.396777
ENSG00000007866.21	chr6	TEAD3	1.12694	-2.93368	3.75617	0.000215217	0.0010156	0.396586
ENSG00000181023.7	chr11	OR56B1	-1.07971	-3.43592	-3.74492	0.000224545	0.00105492	0.389684
ENSG00000197061.4	chr6	HIST1H4C	1.01021	-1.47155	3.78527	0.000192757	0.000923984	0.386441
ENSG00000183569.18	chr22	SERHL2	-0.906834	0.843468	-3.84279	0.000154713	0.000760762	0.383884
ENSG00000254615.2	chr8	AC027031.2	1.5044	-1.47432	3.77679	0.000199062	0.000950052	0.351255
ENSG00000284914.1	chr6	AL121935.2	-1.24601	-2.94962	-3.73839	0.000230143	0.00107819	0.347379
ENSG00000163430.12	chr3	FSTL1	1.09881	0.442267	3.82693	0.000164426	0.000802439	0.340058
ENSG00000107338.10	chr9	SHB	0.939398	-1.73276	3.76295	0.000209778	0.00099389	0.332806
ENSG00000181264.8	chr11	TMEM136	1.1217	-2.45701	3.74554	0.000224029	0.00105298	0.323541
ENSG00000184557.4	chr17	SOCS3	0.912247	6.24056	4.00118	8.33295e-05	0.000440637	0.302152
ENSG00000261556.9	chr16	SMG1P7	-0.855316	2.37762	-3.87905	0.000134512	0.000672261	0.298201
ENSG00000179111.9	chr17	HES7	-1.07259	-3.47086	-3.71737	0.000249038	0.00115542	0.296259
ENSG00000129988.6	chr20	LBP	1.68589	-4.08269	3.71235	0.000253763	0.00117275	0.29515
ENSG00000189337.17	chr1	KAZN	-1.20833	-1.04688	-3.76525	0.000207957	0.000985728	0.287644
ENSG00000189184.11	chr4	PCDH18	1.47522	-4.0212	3.71013	0.000255874	0.00118034	0.286977
ENSG00000223969.5	chr7	AC002456.1	-1.09492	-3.0846	-3.71655	0.0002498	0.00115763	0.280006
ENSG00000049249.8	chr1	TNFRSF9	1.09163	-1.08478	3.76189	0.000210614	0.00099738	0.270574
ENSG00000135253.13	chr7	KCP	-0.992422	-0.181956	-3.78116	0.000195787	0.000936199	0.263348
ENSG00000183145.9	chr21	RIPPLY3	1.39715	-4.08452	3.7015	0.000264265	0.00121155	0.262934
ENSG00000095397.14	chr9	WHRN	0.831809	3.58284	3.92321	0.000113278	0.000577756	0.260935
ENSG00000260949.1	chr8	AP006545.1	-0.965737	-3.26287	-3.70914	0.000256824	0.00118391	0.259322
ENSG00000132357.14	chr5	CARD6	-0.949288	2.29731	-3.86088	0.0001443	0.000715141	0.253548
ENSG00000080854.14	chr11	IGSF9B	-1.33788	-2.99616	-3.70878	0.00025717	0.00118523	0.25023
ENSG00000266437.1	chr19	MIR4746	-1.13383	-3.14068	-3.70576	0.00026009	0.0011965	0.245534
ENSG00000277855.1	chr3	AC097634.3	0.903393	-2.68566	3.71744	0.000248975	0.0011554	0.242592
ENSG00000256152.2	chr12	AC027290.1	-0.830108	0.547756	-3.79491	0.000185819	0.000893202	0.232817
ENSG00000259146.3	chr14	AC005476.2	-0.863601	-2.48726	-3.71436	0.000251862	0.00116557	0.23102
ENSG00000205696.4	chr10	ADARB2-AS1	1.45808	-1.23766	3.74587	0.000223744	0.00105189	0.227207
ENSG00000272516.1	chr10	AL158211.4	0.888807	-3.0781	3.70334	0.000262455	0.0012049	0.223568
ENSG00000269938.1	chr12	AC068790.2	-0.965722	-3.09897	-3.70104	0.000264721	0.00121281	0.218985
ENSG00000272825.1	chr21	AL844908.1	-0.816612	-0.592733	-3.75688	0.000214646	0.00101385	0.213041
ENSG00000267640.6	chr19	AC016582.3	-1.54097	-2.60558	-3.70312	0.000262671	0.00120561	0.208164
ENSG00000102886.15	chr16	GDPD3	-0.900496	1.22019	-3.80937	0.000175849	0.000851579	0.204949
ENSG00000109321.11	chr4	AREG	1.59663	2.50036	3.86137	0.000144026	0.000714135	0.201075
ENSG00000231424.2	chr1	AL445673.1	-1.23361	0.489305	-3.78215	0.00019505	0.000933114	0.200326
ENSG00000286205.1	chr4	AC139887.5	-1.08985	-3.19726	-3.69232	0.000273466	0.0012489	0.198023
ENSG00000283399.1	chr16	AC004381.2	-1.07264	0.0496909	-3.76691	0.000206654	0.000980937	0.195291
ENSG00000227220.1	chr6	AL133346.1	1.33243	-2.8301	3.70159	0.000264174	0.00121141	0.193044
ENSG00000260361.1	chr15	AC106028.3	0.889892	-2.79736	3.69703	0.000268706	0.00122967	0.185839
ENSG00000183248.12	chr19	PRR36	0.900418	-0.964925	3.73937	0.00022929	0.00107495	0.181867
ENSG00000178752.16	chr2	ERFE	1.3118	-2.14512	3.70953	0.000256451	0.00118246	0.181005
ENSG00000228526.7	chr1	MIR34AHG	1.25525	-0.238957	3.76118	0.00021118	0.000999356	0.177555
ENSG00000274220.1	chr16	AC009163.6	0.825767	-1.85173	3.7158	0.000250502	0.00116034	0.177077
ENSG00000158258.16	chr3	CLSTN2	1.37376	-4.02881	3.67315	0.000293669	0.00132702	0.170797
ENSG00000249572.1	chr5	AC034231.1	0.96071	-1.09711	3.73363	0.000234291	0.00109483	0.170059
ENSG00000230701.2	chr22	FBXW4P1	0.838949	0.548104	3.77737	0.000198625	0.000948414	0.167588
ENSG00000105971.15	chr7	CAV2	0.998818	-2.53586	3.69627	0.000269468	0.00123232	0.163143
ENSG00000078018.19	chr2	MAP2	-1.06911	0.404086	-3.76723	0.000206403	0.000980208	0.154606
ENSG00000013725.14	chr11	CD6	-0.868983	3.12606	-3.86709	0.000140879	0.000699739	0.151542
ENSG00000236008.2	chr2	LINC01814	0.879665	-1.36035	3.7166	0.000249755	0.00115763	0.139579
ENSG00000270061.1	chr12	AC068790.5	-0.960098	-3.30895	-3.67031	0.000296789	0.00133901	0.13056
ENSG00000147434.8	chr8	CHRNA6	1.52316	-4.28055	3.6544	0.000314791	0.0014098	0.117971
ENSG00000251493.5	chr5	FOXD1	-1.23712	-2.57504	-3.67729	0.000289197	0.00130886	0.115456
ENSG00000272181.1	chr3	AC012557.2	-0.859693	-2.16831	-3.68819	0.000277711	0.00126541	0.114951
ENSG00000150630.4	chr4	VEGFC	1.24595	-3.78131	3.65819	0.000310415	0.00139303	0.101715
ENSG00000275383.1	chr16	AC126773.4	-0.917186	-2.63098	-3.67246	0.000294431	0.00132956	0.0980675
ENSG00000114019.14	chr3	AMOTL2	1.58394	-3.71304	3.65687	0.00031193	0.00139855	0.097241
ENSG00000285840.1	chr13	AL353648.1	0.985383	-2.90374	3.66955	0.000297623	0.00134247	0.0970373
ENSG00000099994.11	chr22	SUSD2	1.00279	0.502633	3.75643	0.000215004	0.00101483	0.0904708
ENSG00000285836.1	chr3	AC092896.2	-0.986188	-3.27777	-3.65603	0.000312905	0.00140229	0.0854921
ENSG00000275329.1	chr9	AL138781.2	-0.906721	-3.19205	-3.65813	0.000310475	0.00139303	0.0835369
ENSG00000113140.11	chr5	SPARC	0.933216	2.73471	3.83765	0.000157796	0.000773646	0.0696365
ENSG00000237548.1	chr9	TTLL11-IT1	1.34822	-3.85004	3.6432	0.000328079	0.00146183	0.0593655
ENSG00000172828.13	chr16	CES3	-1.07949	-0.814665	-3.70186	0.000263912	0.00121049	0.0540681
ENSG00000264343.6	chr1	NOTCH2NLA	-0.869755	-1.08344	-3.69706	0.000268679	0.00122967	0.0516791
ENSG00000119630.14	chr14	PGF	1.20155	-2.94392	3.6544	0.000314789	0.0014098	0.0510232
ENSG00000272625.1	chr18	AP000919.4	-0.85913	-1.10731	-3.69326	0.000272513	0.00124511	0.047253
ENSG00000113248.6	chr5	PCDHB15	1.27713	-3.51897	3.64335	0.000327896	0.00146134	0.0467927
ENSG00000169385.3	chr14	RNASE2	0.81045	3.29804	3.85031	0.000150302	0.000741602	0.0460956
ENSG00000143850.15	chr1	PLEKHA6	-0.875603	-1.97096	-3.67036	0.000296734	0.00133901	0.0434212
ENSG00000164124.10	chr4	TMEM144	0.961804	-0.519463	3.71251	0.000253609	0.00117254	0.0414578
ENSG00000169604.19	chr2	ANTXR1	1.44835	-2.6933	3.64745	0.000322982	0.00144327	0.0109939
ENSG00000100557.9	chr14	CCDC198	2.10359	-2.45363	3.65377	0.000315531	0.0014128	0.00112384
ENSG00000214595.11	chr2	EML6	1.06107	6.73233	3.92166	0.000113965	0.000580965	-0.00272105
ENSG00000146674.15	chr7	IGFBP3	1.1008	-0.497393	3.69252	0.000273264	0.00124826	-0.0222278
ENSG00000274275.1	chr18	AC009831.3	-1.02253	-3.39551	-3.61758	0.000360489	0.00158519	-0.0346898
ENSG00000120659.15	chr13	TNFSF11	1.46879	-3.13572	3.62415	0.000351897	0.0015525	-0.0353548
ENSG00000204179.10	chr10	PTPN20	-1.40128	-3.28245	-3.61781	0.000360188	0.00158431	-0.042929
ENSG00000224652.1	chr3	LINC00885	-1.68961	-3.76738	-3.60858	0.000372567	0.00163224	-0.0461766
ENSG00000156194.18	chr4	PPEF2	-1.04474	-3.15192	-3.61847	0.00035932	0.00158109	-0.0502673
ENSG00000116141.15	chr1	MARK1	-1.80118	-0.336916	-3.68306	0.000283059	0.00128571	-0.0522844
ENSG00000259015.1	chr14	AL442663.4	-0.810559	-1.42659	-3.65503	0.000314064	0.00140717	-0.0575451
ENSG00000238002.3	chr9	NPAP1P6	1.47689	-3.96652	3.60428	0.000378487	0.00165601	-0.0609342
ENSG00000252835.1	chr17	SCARNA21	-1.09781	-3.55162	-3.60704	0.000374681	0.00164043	-0.0609913
ENSG00000253364.2	chr14	AL928742.1	-1.71093	0.151551	-3.69027	0.000275566	0.00125746	-0.0897166
ENSG00000084636.18	chr1	COL16A1	1.33947	-4.12741	3.5925	0.000395115	0.00171831	-0.0916815
ENSG00000273768.1	chr1	RF00003	1.16973	-2.44863	3.62004	0.000357247	0.00157265	-0.0957704
ENSG00000231439.4	chr16	WASIR2	-1.28155	-0.656638	-3.66375	0.000304087	0.00136703	-0.0973535
ENSG00000073282.13	chr3	TP63	-1.4129	-0.0485791	-3.67781	0.000288642	0.00130723	-0.106321
ENSG00000230010.1	chr20	AL049646.1	1.68662	-4.6106	3.5813	0.000411573	0.00177874	-0.119841
ENSG00000224204.1	chrX	PHEX-AS1	1.0063	-2.23196	3.61733	0.000360824	0.00158632	-0.12485
ENSG00000257341.5	chr14	AL928654.3	1.18339	-3.44959	3.59214	0.000395629	0.0017196	-0.125346
ENSG00000273096.1	chr22	AL021707.8	-0.826133	-1.58101	-3.63108	0.000343049	0.00152079	-0.12606
ENSG00000152154.11	chr2	TMEM178A	1.17451	-3.1222	3.59781	0.000387527	0.00168969	-0.126151
ENSG00000111537.5	chr12	IFNG	1.23744	-3.68363	3.58121	0.000411702	0.00177892	-0.145513
ENSG00000124507.11	chr6	PACSIN1	-0.990358	-0.999394	-3.63591	0.000337012	0.00149733	-0.15633
ENSG00000245532.8	chr11	NEAT1	0.918349	7.58576	3.88119	0.000133401	0.000667371	-0.159053
ENSG00000183873.15	chr3	SCN5A	-1.70945	-2.74218	-3.58955	0.000399391	0.00173331	-0.163475
ENSG00000161664.6	chr17	ASB16	1.24497	-3.78606	3.57402	0.000422604	0.00182367	-0.165729
ENSG00000278156.1	chr13	TSC22D1-AS1	-1.1325	-3.09722	-3.58194	0.000410609	0.00177572	-0.167069
ENSG00000163617.11	chr3	CCDC191	-0.873714	5.05054	-3.85519	0.000147498	0.000729195	-0.16901
ENSG00000279693.1	chr16	AC099521.2	-1.29817	-3.40513	-3.57404	0.00042257	0.00182367	-0.181662
ENSG00000242474.2	chr7	AC093627.5	-0.848029	-2.72565	-3.58459	0.000406673	0.0017621	-0.184552
ENSG00000112378.12	chr6	PERP	-0.888615	-0.82114	-3.63063	0.000343623	0.00152233	-0.190293
ENSG00000227885.2	chr6	AL590652.1	-0.835651	-2.5632	-3.58211	0.000410356	0.00177501	-0.206333
ENSG00000164742.16	chr7	ADCY1	-1.11265	-2.97633	-3.5692	0.000430067	0.00185238	-0.221228
ENSG00000279700.1	chr12	AC131212.2	-1.14012	-1.57527	-3.60055	0.000383676	0.00167544	-0.224085
ENSG00000256673.1	chr12	AC141557.1	-0.998099	-0.507559	-3.62996	0.000344466	0.00152439	-0.225475
ENSG00000278318.5	chr19	ZNF229	-1.07613	0.931115	-3.67483	0.000291844	0.00132025	-0.227848
ENSG00000170122.5	chr9	FOXD4	0.867168	-2.35788	3.58341	0.000408418	0.00176847	-0.228474
ENSG00000164458.9	chr6	TBXT	-1.42096	-3.91993	-3.54938	0.000462056	0.00197158	-0.232664
ENSG00000272463.1	chr6	AL357054.4	-0.848675	-0.707179	-3.62153	0.000355302	0.00156518	-0.238014
ENSG00000257322.5	chr12	AC138123.1	-1.18059	-2.7018	-3.56782	0.00043222	0.00186038	-0.239398
ENSG00000272341.1	chr6	AL137003.2	1.11591	-1.03592	3.61509	0.000363789	0.00159733	-0.245806
ENSG00000228171.1	chr3	AC121251.1	1.22163	-2.51424	3.56938	0.000429781	0.00185221	-0.256739
ENSG00000262877.4	chr17	AC110285.2	-1.31696	-2.1067	-3.57598	0.000419604	0.00181228	-0.259746
ENSG00000185760.15	chr6	KCNQ5	-0.918	2.31573	-3.71806	0.000248396	0.00115339	-0.261845
ENSG00000187955.12	chr8	COL14A1	1.81202	-2.70694	3.56667	0.000434028	0.00186737	-0.263197
ENSG00000188404.9	chr1	SELL	-0.905803	8.46109	-3.85076	0.000150037	0.000740657	-0.26673
ENSG00000211699.2	chr7	TRGV3	-0.970622	-0.571627	-3.6163	0.000362189	0.00159128	-0.270087
ENSG00000059377.17	chr7	TBXAS1	0.817168	4.47811	3.80038	0.000181981	0.000877686	-0.286835
ENSG00000177301.15	chr1	KCNA2	0.842173	1.21464	3.66695	0.0003005	0.00135333	-0.297775
ENSG00000091986.15	chr3	CCDC80	1.60538	-2.57897	3.55359	0.000455076	0.00194614	-0.315002
ENSG00000197702.13	chr11	PARVA	1.27162	-3.93924	3.52497	0.000504532	0.00213242	-0.317228
ENSG00000172236.17	chr16	TPSAB1	1.5034	-3.10186	3.53805	0.000481332	0.00204165	-0.31984
ENSG00000234699.1	chr10	AL139339.1	-0.853404	-2.44334	-3.54937	0.00046207	0.00197158	-0.320407
ENSG00000092529.24	chr15	CAPN3	-0.908402	1.52077	-3.66745	0.000299953	0.00135147	-0.328595
ENSG00000232124.2	chr21	AP001057.1	-0.802999	-0.866402	-3.58787	0.000401845	0.00174231	-0.330874
ENSG00000122543.10	chr7	OCM	-0.931071	-2.49569	-3.54404	0.000471045	0.00200563	-0.337189
ENSG00000184500.15	chr3	PROS1	0.847258	-0.929975	3.58527	0.00040566	0.00175809	-0.346169
ENSG00000279281.1	chr17	AC015883.1	0.835454	-1.71067	3.56377	0.000438619	0.0018839	-0.350067
ENSG00000239388.8	chr3	ASB14	-0.837145	-3.16884	-3.52342	0.000507349	0.00214298	-0.357298
ENSG00000144369.13	chr2	FAM171B	0.872915	-1.71419	3.55702	0.000449462	0.0019239	-0.36618
ENSG00000047457.14	chr3	CP	1.83566	-1.89082	3.55304	0.000455984	0.00194892	-0.377285
ENSG00000135318.12	chr6	NT5E	-1.28893	2.82212	-3.7037	0.0002621	0.00120355	-0.381481
ENSG00000137960.6	chr1	GIPC2	1.01579	-3.53501	3.50754	0.00053707	0.00225011	-0.388699
ENSG00000229676.3	chr19	ZNF492	-1.21524	-0.899664	-3.56833	0.000431424	0.00185749	-0.390118
ENSG00000123358.20	chr12	NR4A1	1.02111	6.55974	3.81495	0.000172139	0.000836028	-0.391427
ENSG00000259803.7	chr16	SLC22A31	1.33725	-3.01301	3.51636	0.000520361	0.00218922	-0.397157
ENSG00000225071.1	chrX	AC004552.1	0.874638	-0.777461	3.57316	0.000423922	0.00182897	-0.397159
ENSG00000174233.11	chr12	ADCY6	1.14238	-0.0160957	3.59835	0.000386771	0.00168713	-0.398516
ENSG00000260279.3	chr16	AC137932.1	-1.09864	-3.37248	-3.50417	0.000543592	0.00227317	-0.406074
ENSG00000251405.3	chr5	AC016571.1	0.977663	-3.21685	3.50698	0.000538143	0.00225413	-0.41526
ENSG00000105559.12	chr19	PLEKHA4	-0.862988	0.818575	-3.61511	0.000363773	0.00159733	-0.416103
ENSG00000277586.2	chr8	NEFL	-1.2961	-3.18683	-3.5034	0.000545074	0.00227889	-0.417185
ENSG00000170074.19	chr5	FAM153A	-1.33653	-2.30459	-3.52142	0.000510994	0.00215611	-0.419109
ENSG00000275772.1	chr22	AC244157.2	-1.36062	-4.00533	-3.48914	0.000573549	0.00238457	-0.419246
ENSG00000286125.1	chr19	AC006115.2	-1.34248	-2.68384	-3.51365	0.000525443	0.00220737	-0.420944
ENSG00000250036.1	chr2	IGKV1D-37	1.28665	-2.66708	3.5189	0.000515644	0.002173	-0.425899
ENSG00000197093.11	chr7	GAL3ST4	-0.975408	-1.10233	-3.55173	0.000458142	0.0019569	-0.426215
ENSG00000272734.1	chr10	ADIRF-AS1	-0.929536	1.38323	-3.63374	0.000339718	0.00150735	-0.428374
ENSG00000241772.2	chr2	AC092620.1	-0.961489	-2.51328	-3.51473	0.000523421	0.00220008	-0.429211
ENSG00000172232.10	chr19	AZU1	1.39377	3.72077	3.73106	0.000236571	0.00110369	-0.431018
ENSG00000007933.13	chr1	FMO3	1.53963	-3.80822	3.49209	0.000567548	0.00236353	-0.434467
ENSG00000257839.1	chr12	AC011611.4	0.871687	-2.37502	3.51899	0.000515483	0.00217278	-0.434574
ENSG00000283294.1	chr18	AP005212.4	-1.21936	-2.71324	-3.50669	0.000538698	0.00225599	-0.43618
ENSG00000143842.15	chr1	SOX13	-1.09028	-2.07027	-3.5203	0.000513065	0.00216395	-0.441477
ENSG00000006210.7	chr16	CX3CL1	1.42226	-4.45459	3.47668	0.000599563	0.00247834	-0.447834
ENSG00000145824.12	chr5	CXCL14	1.67506	-4.07892	3.47808	0.00059657	0.00246755	-0.46143
ENSG00000235058.1	chr3	ZMYND10-AS1	-0.969858	-3.11465	-3.48973	0.000572351	0.00238107	-0.46905
ENSG00000228495.1	chr6	LINC01013	1.17884	1.69911	3.64821	0.00032207	0.00143984	-0.469845
ENSG00000171097.14	chr9	KYAT1	-0.889478	-3.03081	-3.48934	0.000573133	0.00238334	-0.480288
ENSG00000067715.14	chr12	SYT1	-1.08102	-0.876112	-3.54034	0.00047738	0.00202617	-0.483238
ENSG00000279631.1	chr10	AL158211.5	-0.880441	-0.713467	-3.54571	0.000468225	0.00199573	-0.486254
ENSG00000172458.4	chr13	IL17D	0.838452	-1.93828	3.51208	0.000528402	0.00221702	-0.491611
ENSG00000149256.15	chr11	TENM4	-1.35544	-0.621889	-3.54376	0.000471532	0.00200703	-0.49219
ENSG00000173482.16	chr18	PTPRM	0.829889	-0.0149122	3.56951	0.000429577	0.00185178	-0.494663
ENSG00000231476.1	chr7	AC074389.2	-1.35459	-4.78675	-3.45675	0.000643453	0.00263959	-0.494859
ENSG00000170786.12	chr8	SDR16C5	-1.46977	-2.92745	-3.48387	0.000584407	0.00242471	-0.495039
ENSG00000162998.5	chr2	FRZB	1.39366	-2.0255	3.51111	0.000530243	0.00222428	-0.495571
ENSG00000269964.3	chr6	MEI4	1.27858	-3.60803	3.47307	0.000607301	0.00250781	-0.498645
ENSG00000115884.11	chr2	SDC1	1.19476	4.29119	3.73375	0.000234185	0.00109459	-0.499332
ENSG00000130413.15	chr11	STK33	-1.12002	-0.23383	-3.55442	0.000453708	0.00194084	-0.502448
ENSG00000188897.9	chr16	AC099489.1	-0.888841	0.625778	-3.58336	0.000408493	0.00176847	-0.504458
ENSG00000078579.9	chr8	FGF20	-1.5146	-4.152	-3.45904	0.000638272	0.00262226	-0.50975
ENSG00000174885.12	chr11	NLRP6	-0.922159	1.03477	-3.59162	0.000396391	0.00172237	-0.509936
ENSG00000213085.10	chr1	CFAP45	-0.984886	-1.34397	-3.51843	0.000516519	0.00217532	-0.510704
ENSG00000271584.2	chr11	LINC02550	-1.18016	-3.10018	-3.47663	0.000599672	0.00247834	-0.511458
ENSG00000159625.14	chr16	DRC7	-0.895818	-3.10224	-3.4717	0.000610265	0.0025185	-0.524834
ENSG00000257681.1	chr12	AC025265.1	-1.03017	-2.28615	-3.48678	0.000578398	0.00240325	-0.540084
ENSG00000019169.10	chr2	MARCO	0.921355	1.34359	3.6135	0.000365921	0.00160557	-0.542308
ENSG00000158270.12	chr18	COLEC12	0.872562	-1.02183	3.51962	0.000514309	0.00216828	-0.552903
ENSG00000243488.3	chr19	RN7SL337P	-1.03141	-1.946	-3.49106	0.000569636	0.00237124	-0.555731
ENSG00000135437.9	chr12	RDH5	-0.852053	-0.162284	-3.54277	0.000473207	0.00201228	-0.560164
ENSG00000117791.16	chr1	MARC2	-1.05915	-1.21106	-3.50622	0.000539605	0.00225845	-0.569208
ENSG00000111058.8	chr12	ACSS3	1.10195	-3.68929	3.44884	0.0006617	0.00270251	-0.571747
ENSG00000134853.12	chr4	PDGFRA	1.28747	-3.93152	3.44081	0.000680727	0.00276864	-0.589177
ENSG00000163687.13	chr3	DNASE1L3	-1.08765	-0.0356877	-3.53412	0.000488192	0.00206901	-0.591822
ENSG00000175445.16	chr8	LPL	1.31538	-1.00061	3.5083	0.000535618	0.00224542	-0.596423
ENSG00000214694.11	chr2	ARHGEF33	-1.06066	-2.97495	-3.4495	0.00066017	0.00269791	-0.602183
ENSG00000163132.7	chr4	MSX1	1.21961	-3.01798	3.45006	0.000658873	0.00269315	-0.604855
ENSG00000145908.12	chr5	ZNF300	-1.45244	0.503641	-3.54677	0.000466426	0.0019889	-0.611135
ENSG00000148600.15	chr10	CDHR1	1.75293	2.19173	3.61892	0.000358728	0.00157883	-0.62179
ENSG00000234286.1	chr7	AC006026.3	1.02245	-1.44898	3.48703	0.000577871	0.00240205	-0.626168
ENSG00000265206.5	chr17	AC004687.1	-0.881488	3.92952	-3.68541	0.000280591	0.00127623	-0.633377
ENSG00000172602.11	chr12	RND1	0.920622	1.88076	3.59277	0.000394721	0.00171697	-0.634189
ENSG00000163017.13	chr2	ACTG2	-2.24677	-2.24983	-3.4589	0.000638578	0.00262244	-0.636286
ENSG00000162706.13	chr1	CADM3	-1.19729	-3.91699	-3.41946	0.000733804	0.00296036	-0.641375
ENSG00000185915.5	chrX	KLHL34	-1.52459	-2.07901	-3.45287	0.00065235	0.00266974	-0.654614
ENSG00000196668.3	chr12	LINC00173	-1.1506	-1.72625	-3.46225	0.00063106	0.00259406	-0.663141
ENSG00000262074.6	chr17	SNORD3B-2	1.07343	-0.758881	3.49262	0.000566483	0.00236007	-0.672087
ENSG00000102760.13	chr13	RGCC	0.973122	4.00388	3.67456	0.000292138	0.00132099	-0.679595
ENSG00000163354.15	chr1	DCST2	-1.00878	-1.24614	-3.47057	0.000612703	0.00252804	-0.686637
[truncated: 504 more rows]

## Sheet: PCE_vs_PCL
	Chr	Gene Symbol	logFC	AveExpr	t	P.Value	adj.P.Val	B
ENSG00000153707.17	chr9	PTPRD	-4.21593	0.520456	-9.89896	1.18e-19	2.38e-15	33.653
ENSG00000072832.14	chr4	CRMP1	-4.54085	0.139347	-8.61016	8.96e-16	9.02e-12	25.0563
ENSG00000161544.10	chr17	CYGB	-3.42833	1.59513	-8.28748	7.62e-15	5.11e-11	23.1589
ENSG00000127325.19	chr12	BEST3	-4.50305	-0.285652	-8.09254	2.72e-14	1.37e-10	21.7534
ENSG00000157554.19	chr21	ERG	-3.50241	1.70965	-7.97761	5.7e-14	1.92e-10	21.2218
ENSG00000185028.4	chr5	LRRC14B	-3.71402	-1.32691	-8.00883	4.67e-14	1.88e-10	21.0594
ENSG00000169575.4	chr22	VPREB1	-4.25304	2.9436	-7.75635	2.34e-13	6.01e-10	19.8494
ENSG00000153404.14	chr5	PLEKHG4B	-4.01005	-0.761344	-7.75316	2.39e-13	6.01e-10	19.6304
ENSG00000128322.7	chr22	IGLL1	-4.47653	4.71941	-7.73405	2.69e-13	6.03e-10	19.5736
ENSG00000130635.15	chr9	COL5A1	-3.86639	2.69848	-7.60426	6.09e-13	1.12e-09	18.9297
ENSG00000107447.8	chr10	DNTT	-4.27373	5.45025	-7.62405	5.38e-13	1.08e-09	18.8532
ENSG00000122585.8	chr7	NPY	-3.77545	-1.49314	-7.53226	9.55e-13	1.6e-09	18.2025
ENSG00000127955.17	chr7	GNAI1	-3.08758	0.297057	-7.41372	1.99e-12	2.88e-09	17.7345
ENSG00000147100.11	chrX	SLC16A2	-3.29749	-0.637562	-7.41277	2e-12	2.88e-09	17.6422
ENSG00000284543.1	chr1	LINC01226	-3.82451	-0.796281	-7.3819	2.42e-12	3.25e-09	17.4437
ENSG00000156564.8	chr6	LRFN2	-3.91848	-1.19786	-7.35769	2.81e-12	3.53e-09	17.2468
ENSG00000166349.9	chr11	RAG1	-3.64876	4.05131	-7.33463	3.23e-12	3.79e-09	17.201
ENSG00000196549.10	chr3	MME	-3.42382	4.55263	-7.32726	3.38e-12	3.79e-09	17.1098
ENSG00000166073.10	chr15	GPR176	-3.20059	-0.257232	-7.24076	5.73e-12	6.08e-09	16.686
ENSG00000173894.11	chr17	CBX2	-2.9263	1.14981	-7.17817	8.37e-12	8.03e-09	16.4049
ENSG00000101333.16	chr20	PLCB4	-3.31037	-1.8825	-7.20872	6.96e-12	7.01e-09	16.2756
ENSG00000243478.9	chr2	AOX2P	-4.34101	-0.233166	-7.13417	1.09e-11	1e-08	16.0778
ENSG00000172995.16	chr3	ARPP21	-3.97872	1.38757	-7.08864	1.44e-11	1.26e-08	15.8928
ENSG00000175097.7	chr11	RAG2	-4.13396	2.26804	-7.06806	1.62e-11	1.36e-08	15.7654
ENSG00000165480.16	chr13	SKA3	-2.22353	1.75724	-7.02801	2.06e-11	1.66e-08	15.5453
ENSG00000227706.3	chr6	AL713998.1	-3.44096	-2.17963	-7.01171	2.27e-11	1.76e-08	15.1199
ENSG00000164362.19	chr5	TERT	-3.20014	0.557067	-6.93351	3.62e-11	2.59e-08	14.9872
ENSG00000168671.10	chr5	UGT3A2	-3.53259	-0.322368	-6.93519	3.58e-11	2.59e-08	14.9481
ENSG00000248890.1	chr4	HHIP-AS1	-3.64363	-0.285343	-6.91654	4e-11	2.68e-08	14.8465
ENSG00000276043.5	chr19	UHRF1	-2.48383	4.55581	-6.92839	3.73e-11	2.59e-08	14.765
ENSG00000168078.10	chr8	PBK	-2.05876	1.0921	-6.85964	5.59e-11	3.53e-08	14.5865
ENSG00000088305.18	chr20	DNMT3B	-2.47836	1.43643	-6.85895	5.61e-11	3.53e-08	14.5853
ENSG00000164045.11	chr3	CDC25A	-2.00589	1.86173	-6.83835	6.33e-11	3.75e-08	14.4646
ENSG00000131016.17	chr6	AKAP12	-3.51449	3.05389	-6.84835	5.97e-11	3.64e-08	14.4581
ENSG00000123485.12	chr2	HJURP	-1.93998	2.28336	-6.83268	6.54e-11	3.77e-08	14.4189
ENSG00000120833.14	chr12	SOCS2	-2.36672	2.98751	-6.77455	9.19e-11	5.14e-08	14.0454
ENSG00000169607.13	chr2	CKAP2L	-2.11814	2.326	-6.73381	1.16e-10	6.17e-08	13.8606
ENSG00000121005.9	chr8	CRISPLD1	-2.92571	-1.01478	-6.73454	1.16e-10	6.17e-08	13.7828
ENSG00000129173.13	chr11	E2F8	-2.28008	1.15664	-6.68201	1.57e-10	7.54e-08	13.5977
ENSG00000111206.12	chr12	FOXM1	-1.98215	3.36882	-6.69958	1.42e-10	7.15e-08	13.5875
ENSG00000158497.3	chr5	HMHB1	-3.35676	-2.63426	-6.72344	1.24e-10	6.39e-08	13.4681
ENSG00000121152.10	chr2	NCAPH	-1.9018	2.78746	-6.65666	1.82e-10	8.52e-08	13.4002
ENSG00000176890.16	chr18	TYMS	-2.18432	4.67852	-6.68977	1.5e-10	7.38e-08	13.3932
ENSG00000167513.9	chr16	CDT1	-1.97868	3.26405	-6.58417	2.76e-10	1.26e-07	12.9543
ENSG00000164684.13	chr8	ZNF704	-3.06164	0.657027	-6.55261	3.3e-10	1.48e-07	12.8836
ENSG00000161888.11	chr19	SPC24	-1.94896	1.26302	-6.53689	3.61e-10	1.58e-07	12.802
ENSG00000186710.11	chr12	CFAP73	-2.85772	2.02946	-6.51514	4.09e-10	1.68e-07	12.6648
ENSG00000077943.8	chr10	ITGA8	-3.18731	1.27622	-6.51078	4.19e-10	1.69e-07	12.6599
ENSG00000266074.8	chr17	BAHCC1	-3.08709	3.9027	-6.52564	3.85e-10	1.62e-07	12.5589
ENSG00000223806.7	chr21	LINC00114	-3.28807	-2.26637	-6.53267	3.7e-10	1.59e-07	12.5348
ENSG00000157657.14	chr9	ZNF618	-2.19113	2.09304	-6.48104	4.96e-10	1.94e-07	12.476
ENSG00000065328.16	chr10	MCM10	-1.83104	1.90361	-6.46845	5.32e-10	2.02e-07	12.4157
ENSG00000237819.5	chr7	AC002454.1	-3.21842	-2.0888	-6.47928	5.01e-10	1.94e-07	12.2848
ENSG00000246985.7	chr12	SOCS2-AS1	-2.40454	0.430324	-6.44138	6.2e-10	2.31e-07	12.2799
ENSG00000184661.14	chr8	CDCA2	-1.79809	1.94738	-6.38727	8.41e-10	2.92e-07	11.975
ENSG00000233237.7	chr6	LINC00472	-3.42496	-1.08945	-6.38753	8.4e-10	2.92e-07	11.9225
ENSG00000151631.8	chr10	AKR1C6P	-3.20859	-2.69507	-6.42521	6.79e-10	2.49e-07	11.9006
ENSG00000118193.12	chr1	KIF14	-2.13125	1.88091	-6.35453	1.01e-09	3.45e-07	11.8019
ENSG00000131747.15	chr17	TOP2A	-2.25097	5.68973	-6.38804	8.37e-10	2.92e-07	11.6563
ENSG00000113758.13	chr5	DBN1	-2.09432	3.51279	-6.34697	1.05e-09	3.48e-07	11.6276
ENSG00000263667.2	chr6	AL035696.3	-2.84864	-1.83696	-6.32728	1.18e-09	3.82e-07	11.532
ENSG00000161798.7	chr12	AQP5	-3.26015	-2.7616	-6.35065	1.03e-09	3.46e-07	11.5073
ENSG00000164161.10	chr4	HHIP	-3.30173	-0.680889	-6.29024	1.44e-09	4.55e-07	11.4417
ENSG00000164764.11	chr8	SBSPON	-3.72176	-1.87926	-6.31029	1.29e-09	4.13e-07	11.4393
ENSG00000011426.11	chr7	ANLN	-1.85247	2.09324	-6.26939	1.62e-09	4.95e-07	11.337
ENSG00000152990.14	chr4	ADGRA3	-2.61076	1.01062	-6.2613	1.7e-09	5.1e-07	11.3274
ENSG00000157456.8	chr15	CCNB2	-1.98379	2.94118	-6.2756	1.57e-09	4.85e-07	11.3053
ENSG00000251322.7	chr22	SHANK3	-2.96775	-1.46199	-6.25391	1.77e-09	5.16e-07	11.196
ENSG00000089685.15	chr17	BIRC5	-1.9616	3.27933	-6.25459	1.76e-09	5.16e-07	11.1575
ENSG00000167889.12	chr17	MGAT5B	-3.01911	-1.26939	-6.23075	2.01e-09	5.77e-07	11.0942
ENSG00000121570.12	chr3	DPPA4	-3.31934	0.946397	-6.2162	2.17e-09	6.17e-07	11.0909
ENSG00000213853.10	chr16	EMP2	-2.92452	-0.337508	-6.21278	2.22e-09	6.2e-07	11.0545
ENSG00000110841.14	chr12	PPFIBP1	-2.21816	0.807405	-6.20477	2.31e-09	6.39e-07	11.0318
ENSG00000108551.5	chr17	RASD1	-2.32682	1.2691	-6.16191	2.93e-09	7.97e-07	10.8022
ENSG00000093009.9	chr22	CDC45	-1.71769	2.07604	-6.14743	3.17e-09	8.4e-07	10.6941
ENSG00000115163.15	chr2	CENPA	-1.9322	1.31295	-6.14095	3.28e-09	8.49e-07	10.6919
ENSG00000178217.14	chr10	SH2D4B	-2.8525	-0.281279	-6.1408	3.29e-09	8.49e-07	10.685
ENSG00000118513.19	chr6	MYB	-2.7619	4.27409	-6.15258	3.08e-09	8.28e-07	10.4947
ENSG00000117399.14	chr1	CDC20	-1.92266	3.63518	-6.12108	3.66e-09	9.33e-07	10.4062
ENSG00000227028.6	chr2	SLC8A1-AS1	-3.02993	-2.11411	-6.10777	3.93e-09	9.9e-07	10.3829
ENSG00000102935.11	chr16	ZNF423	-2.99129	-1.2982	-6.07224	4.77e-09	1.14e-06	10.2852
ENSG00000169679.14	chr2	BUB1	-1.62559	3.77715	-6.07442	4.71e-09	1.14e-06	10.143
ENSG00000143476.18	chr1	DTL	-1.64829	3.06882	-6.04605	5.49e-09	1.3e-06	10.0799
ENSG00000046604.13	chr18	DSG2	-2.59576	-1.32102	-6.0209	6.29e-09	1.46e-06	10.0255
ENSG00000105810.9	chr7	CDK6	-1.53148	5.44837	-6.07677	4.65e-09	1.14e-06	9.99651
ENSG00000141639.12	chr18	MAPK4	3.70452	-3.87992	6.09342	4.25e-09	1.06e-06	9.99532
ENSG00000186185.13	chr17	KIF18B	-2.01557	1.59512	-6.0037	6.9e-09	1.58e-06	9.97254
ENSG00000158164.7	chrX	TMSB15A	-3.241	-2.54735	-6.02261	6.23e-09	1.46e-06	9.90259
ENSG00000072682.18	chr5	P4HA2	-2.86103	2.54855	-5.99776	7.13e-09	1.61e-06	9.88078
ENSG00000066382.16	chr11	MPPED2	-3.22138	-0.162325	-5.97087	8.23e-09	1.79e-06	9.82276
ENSG00000146670.10	chr11	CDCA5	-1.67494	3.25415	-5.99158	7.37e-09	1.65e-06	9.77575
ENSG00000237649.8	chr6	KIFC1	-1.84329	2.78079	-5.98131	7.78e-09	1.72e-06	9.77424
ENSG00000127564.17	chr16	PKMYT1	-1.73249	2.6081	-5.96673	8.41e-09	1.79e-06	9.71551
ENSG00000197256.10	chr19	KANK2	-2.05318	3.26443	-5.96675	8.41e-09	1.79e-06	9.64606
ENSG00000170549.4	chr5	IRX1	-3.26893	-2.87079	-5.96352	8.56e-09	1.8e-06	9.56551
ENSG00000088325.16	chr20	TPX2	-1.90856	4.2211	-5.96637	8.43e-09	1.79e-06	9.52413
ENSG00000152253.9	chr2	SPC25	-2.05464	0.838463	-5.90896	1.14e-08	2.35e-06	9.5121
ENSG00000121211.7	chr4	MND1	-2.05254	0.563315	-5.89778	1.21e-08	2.45e-06	9.45899
ENSG00000171848.15	chr2	RRM2	-1.60741	4.97094	-5.95774	8.83e-09	1.83e-06	9.40431
ENSG00000151967.18	chr3	SCHIP1	-2.8359	-2.32399	-5.89981	1.2e-08	2.45e-06	9.33178
ENSG00000166803.13	chr15	PCLAF	-1.92013	1.2771	-5.86581	1.44e-08	2.76e-06	9.28362
ENSG00000106078.19	chr7	COBL	-3.00272	-1.53938	-5.86992	1.41e-08	2.76e-06	9.26155
ENSG00000109576.14	chr4	AADAT	-2.92699	-2.93197	-5.89295	1.25e-08	2.49e-06	9.2154
ENSG00000029993.15	chrX	HMGB3	-1.78888	2.93583	-5.86956	1.41e-08	2.76e-06	9.18515
ENSG00000094804.11	chr17	CDC6	-1.37224	2.96166	-5.86639	1.43e-08	2.76e-06	9.16617
ENSG00000175063.17	chr20	UBE2C	-1.88911	2.75232	-5.85563	1.52e-08	2.86e-06	9.13358
ENSG00000170312.15	chr10	CDK1	-1.8036	3.14721	-5.85602	1.52e-08	2.86e-06	9.09218
ENSG00000267568.6	chr17	AC016168.2	-3.21809	-0.870524	-5.81609	1.87e-08	3.46e-06	9.03371
ENSG00000171724.3	chr16	VAT1L	-3.94147	1.308	-5.80943	1.94e-08	3.55e-06	8.99966
ENSG00000135476.11	chr12	ESPL1	-1.72825	2.67165	-5.82002	1.83e-08	3.42e-06	8.96129
ENSG00000161681.15	chr19	SHANK1	-3.20124	-0.143356	-5.76059	2.5e-08	4.23e-06	8.77683
ENSG00000035499.13	chr5	DEPDC1B	-1.87261	1.91095	-5.76342	2.46e-08	4.23e-06	8.73904
ENSG00000112655.16	chr6	PTK7	-2.13265	0.412827	-5.74963	2.65e-08	4.44e-06	8.723
ENSG00000114654.7	chr3	EFCC1	-2.52241	-2.65945	-5.78177	2.24e-08	3.99e-06	8.72238
ENSG00000163273.4	chr2	NPPC	-2.94846	-3.05027	-5.78478	2.2e-08	3.96e-06	8.68197
ENSG00000160883.11	chr5	HK3	1.22908	4.31356	5.80238	2.01e-08	3.65e-06	8.67143
ENSG00000075218.19	chr22	GTSE1	-1.67508	2.38639	-5.73691	2.83e-08	4.67e-06	8.57049
ENSG00000260386.6	chr1	LINC01225	-2.89603	-3.29084	-5.76216	2.48e-08	4.23e-06	8.53761
ENSG00000126787.13	chr14	DLGAP5	-1.88193	2.93498	-5.73731	2.82e-08	4.67e-06	8.51737
ENSG00000072954.7	chr19	TMEM38A	-1.34629	1.89894	-5.71688	3.14e-08	5.14e-06	8.50822
ENSG00000135218.19	chr7	CD36	1.25038	4.67841	5.77486	2.32e-08	4.06e-06	8.49234
ENSG00000114948.13	chr2	ADAM23	-2.84093	1.55196	-5.706	3.32e-08	5.4e-06	8.47472
ENSG00000100526.20	chr14	CDKN3	-1.65831	1.57395	-5.70419	3.35e-08	5.4e-06	8.46463
ENSG00000139734.18	chr13	DIAPH3	-1.62441	1.15723	-5.69706	3.48e-08	5.49e-06	8.44791
ENSG00000148773.14	chr10	MKI67	-2.10576	5.32836	-5.77349	2.34e-08	4.06e-06	8.43526
ENSG00000004468.13	chr4	CD38	-1.84042	5.84628	-5.77543	2.31e-08	4.06e-06	8.42234
ENSG00000152455.15	chr10	SUV39H2	-1.17783	1.81531	-5.69658	3.49e-08	5.49e-06	8.41312
ENSG00000214357.8	chr5	NEURL1B	-2.67214	1.34868	-5.67864	3.83e-08	5.88e-06	8.34965
ENSG00000178999.13	chr17	AURKB	-1.76418	2.73441	-5.69823	3.46e-08	5.49e-06	8.34421
ENSG00000197977.4	chr6	ELOVL2	-3.26591	-2.12459	-5.68478	3.71e-08	5.74e-06	8.32021
ENSG00000166025.18	chr11	AMOTL1	-2.30414	1.69472	-5.67253	3.95e-08	6.03e-06	8.30175
ENSG00000024526.17	chr1	DEPDC1	-2.08355	1.63979	-5.66497	4.11e-08	6.2e-06	8.26775
ENSG00000143479.16	chr1	DYRK3	-1.94137	0.374327	-5.65523	4.32e-08	6.33e-06	8.26141
ENSG00000066279.18	chr1	ASPM	-1.85917	3.23484	-5.68896	3.63e-08	5.67e-06	8.24011
ENSG00000256663.1	chr12	AC112777.1	-2.47338	-1.28717	-5.6543	4.34e-08	6.33e-06	8.2325
ENSG00000143228.13	chr1	NUF2	-1.43588	2.20266	-5.66066	4.2e-08	6.22e-06	8.20775
ENSG00000170558.9	chr18	CDH2	-3.22508	-1.82058	-5.6527	4.37e-08	6.34e-06	8.19304
ENSG00000176641.11	chr18	RNF152	-2.5961	0.34117	-5.63725	4.74e-08	6.72e-06	8.17446
ENSG00000171777.16	chr19	RASGRP4	1.43752	3.12994	5.6641	4.12e-08	6.2e-06	8.12947
ENSG00000139292.13	chr12	LGR5	-2.75499	-2.22726	-5.64167	4.63e-08	6.66e-06	8.107
ENSG00000144354.14	chr2	CDCA7	-2.04367	3.33117	-5.66142	4.18e-08	6.22e-06	8.09083
ENSG00000109805.10	chr4	NCAPG	-1.62814	2.98116	-5.638	4.72e-08	6.72e-06	8.01806
ENSG00000171320.14	chr8	ESCO2	-1.6177	1.96081	-5.61774	5.23e-08	7.32e-06	8.01539
ENSG00000153132.13	chr4	CLGN	-1.86951	-0.944703	-5.60364	5.63e-08	7.82e-06	8.00318
ENSG00000090889.12	chrX	KIF4A	-1.78977	2.35963	-5.62164	5.13e-08	7.23e-06	8.00221
ENSG00000176435.6	chr14	CLEC14A	-2.79077	-1.62526	-5.59556	5.86e-08	8.09e-06	7.93549
ENSG00000157890.17	chr15	MEGF11	-2.66837	-1.2272	-5.5755	6.5e-08	8.78e-06	7.86007
ENSG00000109674.4	chr4	NEIL3	-2.21956	0.0795578	-5.56837	6.74e-08	9.05e-06	7.84457
ENSG00000187116.13	chr19	LILRA5	1.3304	1.91186	5.58184	6.29e-08	8.62e-06	7.84354
ENSG00000114529.12	chr3	C3orf52	-2.37709	-2.19762	-5.57655	6.46e-08	8.78e-06	7.80436
ENSG00000132744.8	chr11	ACY3	-1.74991	0.790235	-5.55374	7.26e-08	9.62e-06	7.76235
ENSG00000114656.11	chr3	KIAA1257	-2.03922	-2.81186	-5.56173	6.97e-08	9.3e-06	7.67279
ENSG00000112984.12	chr5	KIF20A	-1.81968	1.80213	-5.53955	7.8e-08	1.01e-05	7.64585
ENSG00000127423.10	chr1	AUNIP	-1.83191	-0.913702	-5.52101	8.57e-08	1.08e-05	7.61207
ENSG00000158402.20	chr5	CDC25C	-1.76461	-0.148234	-5.51537	8.82e-08	1.1e-05	7.59259
ENSG00000151725.12	chr4	CENPU	-1.65628	3.43657	-5.54407	7.62e-08	9.97e-06	7.49872
ENSG00000171241.9	chr16	SHCBP1	-1.26688	3.19706	-5.53083	8.15e-08	1.04e-05	7.46552
ENSG00000133878.9	chr8	DUSP26	-2.16546	-0.397302	-5.4716	1.1e-07	1.34e-05	7.38552
ENSG00000233093.5	chrX	LINC00892	2.24204	-3.79729	5.52372	8.45e-08	1.07e-05	7.35824
ENSG00000164023.14	chr4	SGMS2	1.60718	0.665569	5.46521	1.14e-07	1.38e-05	7.34274
ENSG00000092853.14	chr1	CLSPN	-1.47661	2.44594	-5.48451	1.03e-07	1.28e-05	7.32664
ENSG00000143382.14	chr1	ADAMTSL4	1.5013	1.93472	5.47155	1.1e-07	1.34e-05	7.30873
ENSG00000137807.15	chr15	KIF23	-1.54399	2.4441	-5.47291	1.09e-07	1.34e-05	7.2709
ENSG00000101057.16	chr20	MYBL2	-1.54292	5.55288	-5.53837	7.85e-08	1.01e-05	7.25036
ENSG00000117632.23	chr1	STMN1	-1.70411	6.16356	-5.53867	7.83e-08	1.01e-05	7.23172
ENSG00000185340.15	chr22	GAS2L1	1.34486	1.09369	5.42865	1.36e-07	1.64e-05	7.1541
ENSG00000065534.18	chr3	MYLK	-2.19335	2.72413	-5.45295	1.21e-07	1.46e-05	7.14539
ENSG00000172889.16	chr9	EGFL7	-1.97548	1.40282	-5.41244	1.48e-07	1.73e-05	7.06188
ENSG00000138356.14	chr2	AOX1	-2.89445	-0.603222	-5.39745	1.59e-07	1.86e-05	7.03763
ENSG00000138180.15	chr10	CEP55	-1.83833	2.26501	-5.4203	1.42e-07	1.69e-05	7.03583
ENSG00000174059.16	chr1	CD34	-2.91752	0.946844	-5.38483	1.7e-07	1.95e-05	6.9534
ENSG00000280560.1	chr10	LINC01374	-2.4374	-2.4291	-5.37643	1.77e-07	2.02e-05	6.86499
ENSG00000117650.13	chr1	NEK2	-1.58761	1.78358	-5.37327	1.8e-07	2.04e-05	6.85207
ENSG00000117724.13	chr1	CENPF	-1.79087	4.3273	-5.41889	1.43e-07	1.7e-05	6.77155
ENSG00000175305.17	chr8	CCNE2	-1.51585	1.78188	-5.35455	1.97e-07	2.23e-05	6.76385
ENSG00000235568.6	chr22	NFAM1	1.23209	3.9622	5.39496	1.61e-07	1.87e-05	6.70425
ENSG00000128218.8	chr22	VPREB3	-1.63161	5.91911	-5.41729	1.44e-07	1.7e-05	6.64692
ENSG00000129195.16	chr17	PIMREG	-2.15945	1.04752	-5.31627	2.38e-07	2.64e-05	6.6281
ENSG00000244301.6	chr2	AOX3P	-2.84636	-2.29142	-5.31192	2.43e-07	2.68e-05	6.58495
ENSG00000161944.16	chr17	ASGR2	1.77432	1.53399	5.30949	2.46e-07	2.7e-05	6.56952
ENSG00000188833.9	chr9	ENTPD8	-3.08546	-1.75716	-5.29735	2.61e-07	2.83e-05	6.55057
ENSG00000145386.10	chr4	CCNA2	-1.49643	3.39654	-5.3344	2.18e-07	2.44e-05	6.4943
ENSG00000100490.9	chr14	CDKL1	1.20992	3.63093	5.33805	2.14e-07	2.41e-05	6.47888
ENSG00000275832.5	chr17	ARHGAP23	-1.41938	0.409813	-5.2783	2.87e-07	3.06e-05	6.47518
ENSG00000005189.19	chr16	REXO5	-1.36859	0.919087	-5.27293	2.95e-07	3.11e-05	6.43264
ENSG00000179750.16	chr22	APOBEC3B	-1.58794	1.39913	-5.26957	3e-07	3.14e-05	6.39215
ENSG00000117016.10	chr1	RIMS3	-1.54447	4.51026	-5.32388	2.29e-07	2.55e-05	6.29522
ENSG00000267521.1	chr17	AC016168.1	-2.96394	-1.45113	-5.23072	3.62e-07	3.73e-05	6.26157
ENSG00000018280.17	chr2	SLC11A1	1.56222	3.60925	5.28919	2.72e-07	2.92e-05	6.25068
ENSG00000232021.6	chr4	LEF1-AS1	-2.33901	-1.26447	-5.22011	3.81e-07	3.9e-05	6.21835
ENSG00000124766.6	chr6	SOX4	-2.09887	4.42144	-5.29584	2.63e-07	2.84e-05	6.17252
ENSG00000149554.12	chr11	CHEK1	-1.34537	2.92034	-5.24993	3.3e-07	3.44e-05	6.15969
ENSG00000176244.7	chr10	ACBD7	-2.04737	-0.880802	-5.204	4.12e-07	4.17e-05	6.15051
ENSG00000186193.9	chr9	SAPCD2	-1.33315	2.38782	-5.2303	3.63e-07	3.73e-05	6.12928
ENSG00000135046.14	chr9	ANXA1	1.01375	5.45123	5.30428	2.53e-07	2.75e-05	6.12496
ENSG00000279692.1	chr17	AC110285.7	-2.37739	0.210992	-5.19876	4.23e-07	4.24e-05	6.116
ENSG00000164929.17	chr8	BAALC	-2.40576	-1.22533	-5.17947	4.64e-07	4.56e-05	6.03681
ENSG00000152611.12	chr5	CAPSL	-2.72032	-2.79775	-5.196	4.28e-07	4.27e-05	6.03109
ENSG00000112742.10	chr6	TTK	-1.38958	2.08286	-5.20261	4.15e-07	4.18e-05	6.03068
ENSG00000123975.5	chr9	CKS2	-1.22933	3.10838	-5.21844	3.84e-07	3.91e-05	5.98852
ENSG00000183624.14	chr3	HMCES	-0.98807	6.22375	-5.27458	2.92e-07	3.1e-05	5.95743
ENSG00000264269.1	chr18	AC016866.1	-2.69601	-2.76552	-5.17027	4.85e-07	4.7e-05	5.92147
ENSG00000136883.14	chr9	KIF12	-2.91514	-3.02867	-5.17109	4.83e-07	4.7e-05	5.90154
ENSG00000122223.13	chr1	CD244	1.2114	1.96359	5.17153	4.82e-07	4.7e-05	5.89819
ENSG00000119326.15	chr9	CTNNAL1	-1.37016	2.63498	-5.17997	4.63e-07	4.56e-05	5.86923
ENSG00000230945.1	chr9	LINC01507	-2.85918	-1.84804	-5.13782	5.67e-07	5.39e-05	5.83495
ENSG00000120885.21	chr8	CLU	1.74951	3.03089	5.18097	4.61e-07	4.56e-05	5.82494
ENSG00000051180.17	chr15	RAD51	-1.44473	2.33703	-5.14528	5.47e-07	5.23e-05	5.74235
ENSG00000259071.1	chr14	AL359397.2	1.20953	1.82368	5.13318	5.8e-07	5.47e-05	5.73461
ENSG00000142910.16	chr1	TINAGL1	-2.36625	-2.57012	-5.12271	6.1e-07	5.71e-05	5.72945
ENSG00000234084.1	chr6	AL049552.1	-2.38571	-3.81364	-5.15164	5.31e-07	5.12e-05	5.72808
ENSG00000182366.9	chr8	FAM87A	-3.03494	-2.29532	-5.11764	6.25e-07	5.83e-05	5.72492
ENSG00000136982.6	chr8	DSCC1	-1.53994	1.0342	-5.1132	6.38e-07	5.93e-05	5.69695
ENSG00000182963.10	chr17	GJC1	-2.50301	-2.44078	-5.10978	6.49e-07	6e-05	5.68192
ENSG00000140284.11	chr15	SLC27A2	-2.05822	-0.187399	-5.10003	6.8e-07	6.22e-05	5.67943
ENSG00000134690.11	chr1	CDCA8	-1.43529	3.15621	-5.13268	5.81e-07	5.47e-05	5.58552
ENSG00000157510.14	chr5	AFAP1L1	-2.22468	-2.19989	-5.08412	7.33e-07	6.6e-05	5.5842
ENSG00000101412.13	chr20	E2F1	-1.3438	3.67297	-5.14505	5.48e-07	5.23e-05	5.56914
ENSG00000160360.13	chr9	GPSM1	-2.10337	2.31093	-5.10246	6.72e-07	6.18e-05	5.54955
ENSG00000179431.6	chr11	FJX1	-2.13199	-1.82398	-5.06465	8.05e-07	7.11e-05	5.51533
ENSG00000105383.15	chr19	CD33	1.14597	2.25369	5.08842	7.18e-07	6.49e-05	5.49162
ENSG00000175471.19	chr5	MCTP1	0.889129	2.04318	5.07947	7.5e-07	6.68e-05	5.47152
ENSG00000270659.1	chr2	AC079610.2	-2.20486	-1.86864	-5.05185	8.55e-07	7.52e-05	5.45813
ENSG00000172322.14	chr12	CLEC12A	1.44989	2.47716	5.08267	7.38e-07	6.61e-05	5.44174
ENSG00000229418.2	chr10	AL136181.1	-2.47861	-3.43398	-5.06804	7.92e-07	7.03e-05	5.41882
ENSG00000105011.9	chr19	ASF1B	-1.30843	3.67818	-5.09077	7.1e-07	6.45e-05	5.31895
ENSG00000087303.18	chr14	NID2	-2.45985	-0.266761	-5.01759	1.01e-06	8.65e-05	5.31546
ENSG00000085840.13	chr1	ORC1	-1.12805	2.55217	-5.0381	9.12e-07	7.92e-05	5.23151
ENSG00000111245.14	chr12	MYL2	-2.65837	-2.92746	-5.00227	1.08e-06	9.22e-05	5.18668
ENSG00000110076.18	chr11	NRXN2	-1.96529	0.404219	-4.98416	1.18e-06	9.92e-05	5.14959
ENSG00000203760.8	chr6	CENPW	-1.22355	1.41356	-4.99623	1.11e-06	9.45e-05	5.14931
ENSG00000253673.1	chr5	AC025437.4	-2.37767	-2.13817	-4.98192	1.19e-06	9.98e-05	5.14645
ENSG00000245694.9	chr16	CRNDE	-2.30963	-1.39974	-4.97094	1.25e-06	0.000104215	5.11821
ENSG00000166851.15	chr16	PLK1	-1.33586	3.51501	-5.04095	9e-07	7.87e-05	5.11587
ENSG00000196230.13	chr6	TUBB	-1.03214	6.36907	-5.09147	7.08e-07	6.45e-05	5.10111
ENSG00000007968.7	chr1	E2F2	-1.2817	2.56762	-4.99225	1.13e-06	9.59e-05	5.02365
ENSG00000164116.16	chr4	GUCY1A1	-1.65782	0.425307	-4.94953	1.38e-06	0.000113314	4.99675
ENSG00000249881.1	chr5	AC008696.2	-2.46922	-2.36056	-4.94244	1.43e-06	0.000116184	4.96853
ENSG00000182578.13	chr5	CSF1R	1.26756	4.66469	5.0404	9.03e-07	7.87e-05	4.9592
ENSG00000132846.6	chr5	ZBED3	-1.09104	2.41481	-4.96965	1.26e-06	0.00010441	4.94026
ENSG00000156509.14	chr8	FBXO43	-1.78883	-0.48963	-4.92076	1.58e-06	0.000127497	4.89707
ENSG00000197249.13	chr14	SERPINA1	1.28219	5.1813	5.03603	9.21e-07	7.97e-05	4.89412
ENSG00000007062.11	chr4	PROM1	-2.09633	-2.45395	-4.91094	1.66e-06	0.000132917	4.83105
ENSG00000184221.13	chr21	OLIG1	1.79949	-0.293691	4.89381	1.79e-06	0.000141595	4.77665
ENSG00000108950.12	chr17	FAM20A	1.75535	0.558381	4.88634	1.86e-06	0.00014493	4.7157
ENSG00000160593.18	chr11	JAML	1.15432	4.16044	4.97162	1.25e-06	0.000104215	4.70958
ENSG00000165304.8	chr9	MELK	-1.48864	1.62582	-4.89625	1.77e-06	0.000141169	4.69189
ENSG00000167900.12	chr17	TK1	-1.2129	3.8647	-4.95511	1.35e-06	0.000110852	4.67753
ENSG00000158869.11	chr1	FCER1G	1.04118	4.09463	4.96224	1.3e-06	0.000107654	4.67654
ENSG00000107281.10	chr9	NPDC1	1.80253	-1.00822	4.86476	2.05e-06	0.000158275	4.6633
ENSG00000198826.11	chr15	ARHGAP11A	-1.01713	2.2418	-4.89454	1.79e-06	0.000141595	4.62663
ENSG00000165891.16	chr12	E2F7	-1.73111	1.10016	-4.86944	2.01e-06	0.000155492	4.61302
ENSG00000167244.20	chr11	IGF2	-2.33242	-3.10703	-4.86242	2.07e-06	0.000159375	4.58873
ENSG00000171051.8	chr19	FPR1	1.23427	4.28953	4.94615	1.41e-06	0.000114651	4.57806
ENSG00000131153.9	chr16	GINS2	-1.25352	2.81828	-4.89811	1.76e-06	0.000140512	4.57392
ENSG00000196550.10	chr1	FAM72A	-1.11621	0.227567	-4.84799	2.22e-06	0.000167136	4.56368
ENSG00000232229.5	chr10	LINC00865	-1.75937	0.543283	-4.84957	2.2e-06	0.000166548	4.5574
ENSG00000172243.17	chr12	CLEC7A	1.41253	2.7753	4.89305	1.8e-06	0.000141595	4.55717
ENSG00000224397.6	chr20	SMIM25	1.37903	1.41531	4.84315	2.27e-06	0.000170259	4.47705
ENSG00000136378.15	chr15	ADAMTS7	2.69127	0.853878	4.83266	2.38e-06	0.000177986	4.46868
ENSG00000125810.10	chr20	CD93	1.23995	4.42421	4.92352	1.56e-06	0.000126376	4.45985
ENSG00000125869.10	chr20	LAMP5	-2.07267	0.498362	-4.82559	2.45e-06	0.000182493	4.45633
ENSG00000178821.13	chr1	TMEM52	-1.96326	-2.32805	-4.80427	2.71e-06	0.000196836	4.39119
ENSG00000186871.7	chrX	ERCC6L	-1.26732	1.07365	-4.81081	2.63e-06	0.000193131	4.36133
ENSG00000163697.17	chr4	APBB2	-2.27275	2.22875	-4.82105	2.51e-06	0.000185644	4.30689
ENSG00000188269.9	chr19	OR7A5	-2.4825	-3.19453	-4.7944	2.83e-06	0.000202246	4.30367
ENSG00000130558.19	chr9	OLFM1	1.97399	-0.976452	4.77869	3.04e-06	0.000215717	4.2988
ENSG00000198680.4	chr9	TUSC1	-1.65139	-0.540067	-4.76606	3.22e-06	0.000226064	4.23787
ENSG00000135636.14	chr2	DYSF	0.970947	3.92723	4.85576	2.14e-06	0.000163094	4.227
ENSG00000188486.3	chr11	H2AFX	-1.01539	5.26173	-4.88424	1.87e-06	0.000145777	4.2062
ENSG00000186638.16	chr9	KIF24	-1.54524	1.07075	-4.77291	3.12e-06	0.000220682	4.19909
ENSG00000156970.12	chr15	BUB1B	-1.33653	2.34031	-4.79567	2.81e-06	0.000201868	4.18449
ENSG00000100162.15	chr22	CENPM	-1.14918	2.34107	-4.79559	2.82e-06	0.000201868	4.18409
ENSG00000110077.14	chr11	MS4A6A	0.914796	4.26283	4.85482	2.15e-06	0.000163185	4.1757
ENSG00000142945.13	chr1	KIF2C	-1.31951	2.89803	-4.80941	2.64e-06	0.000193336	4.17454
ENSG00000122952.17	chr10	ZWINT	-1.2281	3.21603	-4.81594	2.57e-06	0.000189339	4.15831
ENSG00000162676.12	chr1	GFI1	-1.32996	2.74973	-4.78964	2.89e-06	0.000205953	4.10844
ENSG00000103196.12	chr16	CRISPLD2	1.27855	2.01921	4.76271	3.27e-06	0.000227948	4.07684
ENSG00000125851.10	chr20	PCSK2	-2.81509	-2.55211	-4.72847	3.82e-06	0.000259836	4.07129
ENSG00000164611.13	chr5	PTTG1	-1.07214	3.44736	-4.7995	2.77e-06	0.000199725	4.0524
ENSG00000174837.15	chr19	ADGRE1	1.27834	2.35058	4.76467	3.24e-06	0.000226707	4.04958
ENSG00000138131.4	chr10	LOXL4	-2.04145	-2.28945	-4.71767	4.01e-06	0.000270073	4.0364
ENSG00000165617.14	chr14	DACT1	-1.98361	1.35758	-4.7326	3.75e-06	0.000255908	4.00687
ENSG00000121552.4	chr3	CSTA	1.09237	2.43357	4.75686	3.36e-06	0.000233263	4.0063
ENSG00000162062.15	chr16	TEDC2	-1.31207	1.03008	-4.72661	3.85e-06	0.000261148	4.00479
ENSG00000072571.20	chr5	HMMR	-1.49541	3.09476	-4.76941	3.17e-06	0.000223436	3.97361
ENSG00000183856.11	chr1	IQGAP3	-1.66426	0.827397	-4.70635	4.22e-06	0.000282289	3.93189
ENSG00000176463.14	chr15	SLCO3A1	1.03441	2.2684	4.73508	3.71e-06	0.000253923	3.93188
ENSG00000038427.16	chr5	VCAN	1.31773	7.08042	4.83164	2.39e-06	0.000178164	3.92561
ENSG00000119535.17	chr1	CSF3R	1.11471	4.88122	4.80898	2.65e-06	0.000193336	3.90409
ENSG00000236972.2	chr13	FABP5P1	-1.70179	-2.45985	-4.67915	4.77e-06	0.000312955	3.87455
ENSG00000088882.8	chr20	CPXM1	-1.83224	1.1097	-4.69336	4.47e-06	0.000297277	3.85892
ENSG00000161133.16	chr22	USP41	-2.16654	-2.45919	-4.67482	4.86e-06	0.000317778	3.85706
ENSG00000170458.14	chr5	CD14	1.24253	5.23814	4.80334	2.72e-06	0.000196961	3.85103
ENSG00000128536.16	chr7	CDHR3	-1.98919	0.641232	-4.68018	4.74e-06	0.000312955	3.83253
ENSG00000196839.13	chr20	ADA	-1.10185	3.74796	-4.75332	3.41e-06	0.00023622	3.80646
ENSG00000126822.17	chr14	PLEKHG3	1.18564	1.44771	4.68564	4.63e-06	0.000306728	3.80087
ENSG00000275393.1	chr16	AC018695.6	1.36437	0.379176	4.66246	5.13e-06	0.000334725	3.77187
ENSG00000092421.16	chr5	SEMA6A	-1.85629	-2.13436	-4.64989	5.43e-06	0.000348386	3.76479
ENSG00000138378.19	chr2	STAT4	1.43871	0.865496	4.66005	5.19e-06	0.00033618	3.73516
ENSG00000143882.12	chr2	ATP6V1C2	-1.43693	-1.20359	-4.63936	5.69e-06	0.000359384	3.72414
ENSG00000010327.10	chr3	STAB1	1.48783	3.53671	4.72128	3.94e-06	0.000266605	3.70041
ENSG00000074211.14	chr4	PPP2R2C	-2.73145	-2.70379	-4.63006	5.93e-06	0.000368762	3.66845
ENSG00000145687.16	chr5	SSBP2	-1.42747	4.42366	-4.74178	3.6e-06	0.000248029	3.66114
ENSG00000154229.12	chr17	PRKCA	1.05832	1.87067	4.6612	5.16e-06	0.000335537	3.65989
ENSG00000156535.15	chr6	CD109	-1.60906	0.496122	-4.63144	5.89e-06	0.00036765	3.63707
ENSG00000139970.17	chr14	RTN1	1.58398	1.12663	4.63556	5.79e-06	0.000363226	3.61539
ENSG00000103569.9	chr15	AQP9	1.40168	2.96858	4.67896	4.77e-06	0.000312955	3.60349
ENSG00000067840.12	chrX	PDZD4	1.65214	-0.250546	4.61237	6.41e-06	0.00038924	3.59015
ENSG00000134755.16	chr18	DSC2	1.37123	1.17328	4.62916	5.95e-06	0.000369101	3.58531
ENSG00000010610.10	chr12	CD4	1.01819	5.20762	4.73651	3.68e-06	0.000253146	3.56216
ENSG00000166813.15	chr15	KIF7	-1.90073	-2.41336	-4.59859	6.82e-06	0.000407566	3.5524
ENSG00000253187.2	chr7	HOXA10-AS	-2.0759	-3.5249	-4.61	6.48e-06	0.00039099	3.54376
ENSG00000242048.3	chr7	AC093583.1	2.00919	-4.07484	4.62075	6.18e-06	0.000379633	3.53948
ENSG00000135451.13	chr12	TROAP	-1.28998	2.17065	-4.63732	5.74e-06	0.000361527	3.52814
ENSG00000145569.6	chr5	OTULINL	0.911819	2.78167	4.64397	5.58e-06	0.000355432	3.48096
ENSG00000179097.5	chr3	HTR1F	-2.15752	-3.21398	-4.58498	7.24e-06	0.000427698	3.46562
ENSG00000165716.11	chr9	DIPK1B	-2.04317	2.14143	-4.62102	6.17e-06	0.000379633	3.46295
ENSG00000138160.6	chr10	KIF11	-1.2109	4.45255	-4.6945	4.45e-06	0.000296742	3.4538
ENSG00000141574.7	chr17	SECTM1	1.17026	2.97355	4.64292	5.6e-06	0.000355974	3.44992
ENSG00000170293.9	chr3	CMTM8	-1.88313	0.944652	-4.59119	7.04e-06	0.000419839	3.44383
ENSG00000171860.4	chr12	C3AR1	1.34671	2.4454	4.62266	6.13e-06	0.000378743	3.43454
ENSG00000134369.15	chr1	NAV1	-1.06069	3.35935	-4.65181	5.38e-06	0.000346531	3.43074
ENSG00000121957.14	chr1	GPSM2	-1.39634	2.43749	-4.61764	6.27e-06	0.000382901	3.41445
ENSG00000138119.17	chr10	MYOF	1.22469	2.08753	4.60737	6.56e-06	0.000393219	3.41171
ENSG00000162073.13	chr16	PAQR4	-1.06579	3.25359	-4.64019	5.67e-06	0.000359188	3.39746
ENSG00000150337.13	chr1	FCGR1A	1.4033	1.28528	4.58547	7.22e-06	0.000427698	3.3953
ENSG00000112312.10	chr6	GMNN	-0.869711	2.83702	-4.61744	6.27e-06	0.000382901	3.36162
ENSG00000108846.16	chr17	ABCC3	1.19206	1.09807	4.5682	7.79e-06	0.000455152	3.3382
ENSG00000268658.5	chr19	LINC00664	-1.96471	-1.92119	-4.54036	8.81e-06	0.000501167	3.328
ENSG00000080986.13	chr18	NDC80	-0.965407	3.07337	-4.61012	6.48e-06	0.00039099	3.29728
ENSG00000174371.17	chr1	EXO1	-1.12922	2.03671	-4.57858	7.45e-06	0.000437374	3.29722
ENSG00000085999.12	chr1	RAD54L	-1.3557	1.54582	-4.56519	7.9e-06	0.000459881	3.28962
ENSG00000227220.1	chr6	AL133346.1	-2.22585	-2.8301	-4.53492	9.02e-06	0.000510335	3.28752
ENSG00000272476.1	chr6	AL024507.2	-1.11719	-1.06625	-4.53137	9.16e-06	0.000516876	3.28411
ENSG00000103313.12	chr16	MEFV	1.29639	2.26795	4.58023	7.39e-06	0.000435468	3.27833
ENSG00000179241.13	chr11	LDLRAD3	1.18867	-0.240525	4.52958	9.23e-06	0.000518029	3.25216
ENSG00000102098.18	chrX	SCML2	-1.66734	1.47799	-4.55353	8.31e-06	0.000482614	3.24749
ENSG00000253983.2	chr8	AC087627.1	-2.27125	-3.69369	-4.53649	8.96e-06	0.000508284	3.2463
ENSG00000196209.12	chr20	SIRPB2	1.3224	1.90764	4.54989	8.45e-06	0.000488979	3.19188
ENSG00000154102.11	chr16	C16orf74	0.8913	5.33287	4.6519	5.38e-06	0.000346531	3.19038
ENSG00000116962.15	chr1	NID1	1.32828	1.6966	4.54385	8.67e-06	0.000495849	3.18781
ENSG00000101213.7	chr20	PTK6	1.21111	0.358461	4.51236	9.95e-06	0.000544743	3.15585
ENSG00000139998.15	chr14	RAB15	-1.37882	0.876887	-4.51621	9.79e-06	0.000537154	3.14073
ENSG00000227619.2	chr9	AL391056.1	-2.43828	-3.20984	-4.50107	1.05e-05	0.00056754	3.13928
ENSG00000148655.15	chr10	LRMDA	1.17833	-0.526217	4.49456	1.08e-05	0.000579126	3.12127
ENSG00000143494.15	chr1	VASH2	-1.83493	-0.355811	-4.49472	1.07e-05	0.000579126	3.11591
ENSG00000138587.6	chr15	MNS1	-1.7936	-1.18377	-4.48832	1.1e-05	0.000591853	3.11457
ENSG00000129450.8	chr19	SIGLEC9	1.12271	1.7005	4.52561	9.39e-06	0.000525609	3.11242
ENSG00000110237.4	chr11	ARHGEF17	-1.39597	0.0795808	-4.49623	1.07e-05	0.000578049	3.10415
ENSG00000104738.17	chr8	MCM4	-0.956145	5.3769	-4.63183	5.88e-06	0.00036765	3.10227
ENSG00000274267.1	chr6	HIST1H3B	-2.15436	-2.7531	-4.48574	1.12e-05	0.000596918	3.09842
ENSG00000138829.12	chr5	FBN2	1.23626	1.09004	4.50678	1.02e-05	0.00055663	3.0872
ENSG00000142731.11	chr4	PLK4	-1.07874	2.82271	-4.5491	8.48e-06	0.000489255	3.07804
ENSG00000151948.12	chr12	GLT1D1	1.07984	2.28005	4.5301	9.21e-06	0.000518029	3.06921
ENSG00000130147.16	chr2	SH3BP4	-1.76248	-0.247101	-4.48387	1.13e-05	0.000598595	3.06824
ENSG00000110318.13	chr11	CEP126	0.821409	2.87467	4.54344	8.69e-06	0.000495849	3.04728
ENSG00000268119.5	chr19	AC010615.2	-1.87206	-0.457255	-4.47552	1.17e-05	0.000615763	3.04263
ENSG00000167094.16	chr9	TTC16	2.12901	-2.5424	4.46962	1.2e-05	0.000628383	3.04144
ENSG00000186074.19	chr17	CD300LF	1.11932	2.23677	4.51899	9.67e-06	0.000535069	3.02849
ENSG00000082074.17	chr5	FYB1	1.11557	5.10907	4.6087	6.52e-06	0.000392079	3.0224
ENSG00000196747.4	chr6	HIST1H2AI	-1.2663	-1.13306	-4.46515	1.22e-05	0.000635674	3.02144
ENSG00000186889.10	chr2	TMEM17	-1.53191	-1.76213	-4.45231	1.29e-05	0.000666711	2.98017
ENSG00000127589.4	chr8	TUBBP1	-1.0109	0.566117	-4.46679	1.21e-05	0.000633364	2.9602
ENSG00000138778.11	chr4	CENPE	-1.17391	2.77318	-4.51696	9.75e-06	0.000536856	2.95186
ENSG00000146410.12	chr6	MTFR2	-0.902168	1.19838	-4.47091	1.19e-05	0.000626534	2.9332
ENSG00000278272.1	chr6	HIST1H3C	-1.96184	-2.8773	-4.43706	1.38e-05	0.000699388	2.90643
ENSG00000109743.11	chr4	BST1	0.920296	2.7097	4.50335	1.03e-05	0.000563468	2.90445
ENSG00000109501.13	chr4	WFS1	-0.911975	4.01316	-4.54637	8.58e-06	0.000493724	2.8871
ENSG00000205444.3	chr6	AL034376.1	-2.18954	-3.77143	-4.44322	1.34e-05	0.000685478	2.88529
ENSG00000164109.14	chr4	MAD2L1	-1.03983	3.42362	-4.52157	9.56e-06	0.000532519	2.87481
ENSG00000213160.10	chr2	KLHL23	-1.44345	0.714098	-4.44604	1.33e-05	0.000680128	2.86765
ENSG00000166451.13	chr16	CENPN	-0.817578	2.61951	-4.49006	1.1e-05	0.000588981	2.86196
ENSG00000227242.4	chr1	NBPF13P	-2.70653	-1.64595	-4.42124	1.48e-05	0.000735527	2.85763
ENSG00000134057.15	chr5	CCNB1	-1.15511	3.50207	-4.51962	9.64e-06	0.000535059	2.85453
ENSG00000198682.13	chr10	PAPSS2	1.23563	0.10238	4.43283	1.4e-05	0.000708638	2.84891
ENSG00000177602.5	chr17	HASPIN	-0.967259	1.55187	-4.45658	1.27e-05	0.000657932	2.84492
ENSG00000245164.7	chr8	LINC00861	2.13668	0.0276704	4.42978	1.42e-05	0.000716163	2.84031
ENSG00000130413.15	chr11	STK33	-1.95749	-0.233833	-4.4153	1.51e-05	0.000752642	2.79429
ENSG00000011600.11	chr19	TYROBP	0.994233	4.70806	4.54507	8.63e-06	0.000495125	2.79159
ENSG00000150938.10	chr2	CRIM1	-1.41714	1.86216	-4.45005	1.3e-05	0.000671503	2.78819
ENSG00000215218.4	chr5	UBE2QL1	-2.37217	-1.16524	-4.40288	1.6e-05	0.000785935	2.77692
ENSG00000137804.13	chr15	NUSAP1	-1.28054	0.112483	-4.41094	1.54e-05	0.000763023	2.76138
ENSG00000229106.1	chr1	BTBD6P1	1.02603	1.95881	4.4459	1.33e-05	0.000680128	2.76119
ENSG00000113263.12	chr5	ITK	1.6286	1.95467	4.4429	1.34e-05	0.000685478	2.74949
ENSG00000103888.17	chr15	CEMIP	-2.31867	0.720958	-4.41433	1.52e-05	0.000753913	2.74025
ENSG00000268849.5	chr19	SIGLEC22P	1.45304	-1.85826	4.38446	1.73e-05	0.000841936	2.71657
ENSG00000155380.11	chr1	SLC16A1	-0.827347	1.75589	-4.42795	1.43e-05	0.000720032	2.70967
ENSG00000197813.5	chr19	AC011450.1	0.827742	2.65163	4.45308	1.29e-05	0.000666214	2.7065
ENSG00000225205.5	chr2	AC078883.1	-0.83181	1.95584	-4.4256	1.45e-05	0.000723721	2.67941
ENSG00000186407.7	chr17	CD300E	1.53156	3.7617	4.48427	1.12e-05	0.000598595	2.66794
ENSG00000122254.7	chr16	HS3ST2	-2.54607	-2.12927	-4.36585	1.87e-05	0.0009037	2.6456
ENSG00000071539.14	chr5	TRIP13	-1.08912	1.85927	-4.41027	1.55e-05	0.000763361	2.62791
ENSG00000132646.11	chr20	PCNA	-0.882185	6.11777	-4.51809	9.71e-06	0.000535698	2.59392
ENSG00000135338.14	chr6	LCA5	-1.79607	-2.02037	-4.34122	2.07e-05	0.000985199	2.55114
ENSG00000119042.17	chr2	SATB2	2.10874	0.040787	4.3566	1.94e-05	0.000931897	2.55039
ENSG00000050165.17	chr11	DKK3	1.95801	-3.62956	4.34281	2.06e-05	0.000980902	2.51786
ENSG00000183019.7	chr19	MCEMP1	1.16777	0.981345	4.36203	1.9e-05	0.000915041	2.51409
ENSG00000187554.13	chr1	TLR5	1.29121	0.678526	4.35236	1.98e-05	0.000946535	2.49727
ENSG00000170365.10	chr4	SMAD1	-1.70699	2.49268	-4.39311	1.66e-05	0.000813437	2.48473
ENSG00000140534.13	chr15	TICRR	-1.66056	1.29935	-4.35904	1.92e-05	0.000924529	2.47658
ENSG00000155265.11	chr10	GOLGA7B	1.80119	-1.55863	4.31629	2.3e-05	0.00107659	2.45039
ENSG00000272168.7	chr6	CASC15	-1.74658	-2.18225	-4.30471	2.42e-05	0.0011225	2.41253
ENSG00000283416.1	chr16	MIR1910	1.87676	-2.93224	4.29642	2.5e-05	0.00115425	2.37234
ENSG00000132640.15	chr20	BTBD3	-1.83463	2.60123	-4.36851	1.85e-05	0.000896674	2.37159
ENSG00000085265.11	chr9	FCN1	1.038	7.24855	4.46659	1.21e-05	0.000633364	2.36871
ENSG00000175538.10	chr11	KCNE3	1.26177	1.61454	4.3389	2.09e-05	0.00099254	2.36789
ENSG00000164746.14	chr7	C7orf57	-2.38803	-3.77993	-4.30233	2.44e-05	0.00112855	2.36
ENSG00000148498.16	chr10	PARD3	-1.84695	-0.193893	-4.30375	2.43e-05	0.00112444	2.35537
ENSG00000163082.10	chr2	SGPP2	-1.71032	4.26414	-4.42598	1.45e-05	0.000723721	2.35422
ENSG00000163251.4	chr2	FZD5	-0.833387	1.11206	-4.31689	2.3e-05	0.00107637	2.3259
ENSG00000215784.6	chr1	FAM72D	-1.30785	-0.691374	-4.27785	2.71e-05	0.00123339	2.27662
ENSG00000168447.11	chr16	SCNN1B	-1.99236	-0.333145	-4.27531	2.74e-05	0.00124318	2.25182
ENSG00000147459.18	chr8	DOCK5	1.18572	2.00578	4.31774	2.29e-05	0.00107507	2.24313
ENSG00000122121.11	chrX	XPNPEP2	-1.25651	-0.419971	-4.26365	2.87e-05	0.00129116	2.21083
ENSG00000130052.13	chrX	STARD8	0.85865	0.475551	4.2746	2.74e-05	0.00124318	2.20636
ENSG00000166527.8	chr12	CLEC4D	1.26005	0.660786	4.27434	2.75e-05	0.00124318	2.19329
ENSG00000235397.1	chr17	EPN2-AS1	-1.90406	-3.22079	-4.24578	3.09e-05	0.00136942	2.17668
ENSG00000285844.1	chr6	FO393414.3	-1.9244	-3.02903	-4.23095	3.29e-05	0.00144048	2.12743
ENSG00000132704.16	chr1	FCRL2	0.926034	7.8531	4.40121	1.61e-05	0.000789322	2.1024
ENSG00000101916.11	chrX	TLR8	1.21723	3.06179	4.30631	2.4e-05	0.00111815	2.05738
ENSG00000104147.9	chr15	OIP5	-1.16438	0.796847	-4.24088	3.16e-05	0.00139147	2.05421
ENSG00000163808.17	chr3	KIF15	-1.12779	3.11594	-4.30618	2.4e-05	0.00111815	2.04861
ENSG00000114346.13	chr3	ECT2	-0.819743	3.02712	-4.28995	2.57e-05	0.00118278	1.99782
ENSG00000170909.13	chr19	OSCAR	1.2676	0.580323	4.22102	3.43e-05	0.0014912	1.99295
ENSG00000163975.12	chr3	MELTF	-1.1328	2.11948	-4.25358	2.99e-05	0.00132867	1.97794
ENSG00000168916.15	chr5	ZNF608	-1.57831	4.74301	-4.34466	2.04e-05	0.000975579	1.96612
ENSG00000051341.14	chr3	POLQ	-1.07364	2.0268	-4.24488	3.1e-05	0.00137154	1.95484
ENSG00000030419.16	chr2	IKZF2	-1.60885	3.42831	-4.28885	2.58e-05	0.00118332	1.93093
ENSG00000140525.17	chr15	FANCI	-0.97253	4.3049	-4.31945	2.27e-05	0.00106982	1.91825
ENSG00000119411.11	chr9	BSPRY	-1.34729	1.44945	-4.21863	3.46e-05	0.00150275	1.91361
ENSG00000160013.9	chr19	PTGIR	1.52196	0.0902374	4.17882	4.08e-05	0.00172945	1.86202
ENSG00000177398.18	chr21	UMODL1	-1.42016	-0.572361	-4.16466	4.32e-05	0.00182509	1.84167
ENSG00000132669.13	chr20	RIN2	1.30121	1.21038	4.19206	3.86e-05	0.00165179	1.83327
ENSG00000049249.8	chr1	TNFRSF9	1.71729	-1.08478	4.15194	4.55e-05	0.0019025	1.81546
ENSG00000127152.18	chr14	BCL11B	1.48617	1.98194	4.20271	3.7e-05	0.00158771	1.79643
ENSG00000253134.1	chr5	AC025437.1	-2.02958	-3.64816	-4.14023	4.77e-05	0.00197917	1.77949
ENSG00000239264.8	chr6	TXNDC5	-1.06763	4.43534	-4.28819	2.59e-05	0.00118387	1.77638
ENSG00000141748.12	chr17	ARL5C	-1.96687	-3.45781	-4.13247	4.93e-05	0.00201755	1.7585
ENSG00000261222.2	chr17	AC064805.1	1.56256	-1.28062	4.13214	4.93e-05	0.00201755	1.74903
ENSG00000237410.1	chr11	AP001092.1	-2.17088	-3.66644	-4.12799	5.02e-05	0.00204201	1.73522
ENSG00000198019.12	chr1	FCGR1B	1.30898	-0.712239	4.1315	4.95e-05	0.00201755	1.72386
ENSG00000087842.11	chrX	PIR	-1.53205	-2.13547	-4.1175	5.24e-05	0.00210998	1.71618
ENSG00000084710.14	chr2	EFR3B	-1.96167	-2.12685	-4.11593	5.27e-05	0.00211921	1.71035
ENSG00000187796.14	chr9	CARD9	1.03762	1.45823	4.16349	4.34e-05	0.00182999	1.70113
ENSG00000169174.10	chr1	PCSK9	-2.57085	-2.18129	-4.11122	5.37e-05	0.00214143	1.69386
ENSG00000123453.18	chr9	SARDH	-1.45603	0.311893	-4.13771	4.82e-05	0.00198733	1.6937
ENSG00000046653.15	chrX	GPM6B	-1.92937	-1.53495	-4.11137	5.37e-05	0.00214143	1.68074
ENSG00000107551.21	chr10	RASSF4	0.854846	3.43513	4.22377	3.39e-05	0.00147751	1.67374
ENSG00000261061.1	chr16	AC092718.4	-0.812144	0.0446478	-4.12754	5.03e-05	0.00204201	1.67134
ENSG00000050438.17	chr12	SLC4A8	0.858008	2.52279	4.17178	4.2e-05	0.00177635	1.60939
ENSG00000176912.3	chr18	TYMSOS	-1.58342	-1.73304	-4.08913	5.87e-05	0.00228866	1.60487
ENSG00000138061.12	chr2	CYP1B1	1.24764	3.09912	4.18587	3.96e-05	0.0016872	1.57946
ENSG00000101938.14	chrX	CHRDL1	-1.91626	-0.964337	-4.08308	6.02e-05	0.00233168	1.55562
ENSG00000164687.11	chr8	FABP5	-1.10304	2.73301	-4.15968	4.41e-05	0.00185487	1.53332
ENSG00000231007.5	chr9	CDC20P1	-1.73514	-3.00098	-4.06462	6.48e-05	0.00249224	1.52638
ENSG00000244086.1	chr17	AC110749.1	-0.903357	-1.4021	-4.0668	6.43e-05	0.0024752	1.51322
ENSG00000254350.1	chr5	AC091979.1	-2.00374	-3.1501	-4.06085	6.58e-05	0.0025088	1.51097
ENSG00000167601.12	chr19	AXL	-2.13674	0.498513	-4.08955	5.86e-05	0.00228866	1.50103
ENSG00000151715.7	chr11	TMEM45B	1.74193	-3.68678	4.05938	6.62e-05	0.0025088	1.49235
ENSG00000171049.9	chr19	FPR2	1.23144	1.71196	4.11508	5.29e-05	0.0021223	1.49129
ENSG00000145506.13	chr5	NKD2	-2.05973	-3.11688	-4.04875	6.91e-05	0.00259165	1.46865
ENSG00000137310.12	chr6	TCF19	-0.808595	2.96468	-4.14945	4.6e-05	0.00191404	1.45963
ENSG00000261790.1	chr16	AC005606.2	1.41601	-3.15035	4.04629	6.98e-05	0.00260757	1.45948
ENSG00000187260.15	chr7	WDR86	-1.47336	-0.949277	-4.0566	6.69e-05	0.00253027	1.45783
ENSG00000183496.6	chr15	MEX3B	-1.39205	-0.374933	-4.04633	6.98e-05	0.00260757	1.3927
ENSG00000175130.7	chr1	MARCKSL1	-1.02585	5.68791	-4.21675	3.49e-05	0.00150796	1.38974
ENSG00000242193.11	chr1	CRYZL2P	1.15264	-1.19349	4.03354	7.34e-05	0.00271866	1.38422
ENSG00000215458.8	chr21	AATBC	1.73415	-0.350439	4.04033	7.15e-05	0.00265575	1.36939
ENSG00000035664.11	chr15	DAPK2	1.15401	2.13188	4.09512	5.73e-05	0.00224706	1.36763
ENSG00000164125.15	chr4	GASK1B	1.19919	3.15113	4.13152	4.95e-05	0.00201755	1.36198
ENSG00000070081.16	chr11	NUCB2	-1.01181	5.83137	-4.21021	3.58e-05	0.00154263	1.35839
ENSG00000204054.13	chr9	LINC00963	0.953119	2.3167	4.09813	5.66e-05	0.00222421	1.35566
ENSG00000173083.15	chr4	HPSE	1.03014	2.49512	4.10248	5.57e-05	0.00219681	1.34835
ENSG00000162337.12	chr11	LRP5	1.09726	4.71153	4.18299	4.01e-05	0.00170366	1.32978
ENSG00000142405.21	chr19	NLRP12	1.20955	1.6265	4.06966	6.35e-05	0.00245161	1.32935
ENSG00000120457.12	chr11	KCNJ5	-1.89696	-1.76977	-4.01159	8.01e-05	0.00290824	1.32542
ENSG00000146592.17	chr7	CREB5	1.27863	1.45706	4.06257	6.54e-05	0.00250806	1.32014
ENSG00000133816.15	chr11	MICAL2	1.14265	3.03538	4.11077	5.38e-05	0.00214143	1.30078
ENSG00000123416.15	chr12	TUBA1B	-0.818881	8.79803	-4.19841	3.76e-05	0.00161265	1.29963
ENSG00000272540.1	chr6	AL662797.1	-1.49366	-3.23897	-3.99966	8.4e-05	0.00301131	1.29446
ENSG00000140090.17	chr14	SLC24A4	1.19912	1.28034	4.0509	6.85e-05	0.00257911	1.2937
ENSG00000224610.1	chrX	AC108879.1	-2.00423	-1.96731	-4.00111	8.35e-05	0.00300338	1.29315
ENSG00000167693.17	chr17	NXN	-1.6052	-1.28163	-4.00691	8.16e-05	0.00295223	1.29145
ENSG00000250366.2	chr14	TUNAR	-2.07603	-1.58399	-4.0034	8.28e-05	0.00298285	1.29018
ENSG00000068489.12	chr17	PRR11	-0.860346	3.0879	-4.10931	5.41e-05	0.00214261	1.28704
ENSG00000136830.12	chr9	FAM129B	0.976458	2.98425	4.10217	5.57e-05	0.00219681	1.27592
ENSG00000063127.15	chr19	SLC6A16	0.850388	3.81148	4.13458	4.89e-05	0.0020087	1.2673
ENSG00000253792.1	chr5	AC025437.5	-2.08012	-3.51782	-3.99268	8.64e-05	0.0030794	1.26483
ENSG00000157613.10	chr11	CREB3L1	-1.82112	-3.46315	-3.97882	9.12e-05	0.00321301	1.21808
ENSG00000173597.9	chr4	SULT1B1	1.39775	1.12998	4.02426	7.62e-05	0.00279702	1.20872
ENSG00000096006.11	chr6	CRISP3	-2.01288	2.42314	-4.06157	6.56e-05	0.00250858	1.20363
ENSG00000110492.15	chr11	MDK	-1.13386	1.9524	-4.04457	7.03e-05	0.00262076	1.19928
ENSG00000105609.16	chr19	LILRB5	-2.14468	-1.03236	-3.98303	8.97e-05	0.00317777	1.19469
ENSG00000131969.15	chr14	ABHD12B	-1.84522	-3.80821	-3.9648	9.64e-05	0.00337206	1.16089
ENSG00000240671.4	chr2	IGKV1-8	-1.67084	0.46902	-3.996	8.52e-05	0.00304988	1.15759
ENSG00000034053.14	chr15	APBA2	1.44814	-0.882391	3.97181	9.38e-05	0.00329162	1.1473
ENSG00000073754.6	chr1	CD5L	-2.08512	2.80464	-4.05919	6.63e-05	0.0025088	1.14049
ENSG00000184584.13	chr5	TMEM173	0.845964	3.4992	4.0881	5.9e-05	0.00228936	1.14027
ENSG00000104974.11	chr19	LILRA1	1.19909	1.71525	4.01977	7.76e-05	0.00282539	1.13386
ENSG00000259985.1	chr18	AC017100.1	-1.69606	-2.01462	-3.95222	0.00010131	0.00351266	1.1209
ENSG00000204131.9	chrX	NHSL2	1.27604	2.0152	4.02359	7.64e-05	0.00279783	1.11366
ENSG00000204960.6	chr7	BLACE	-2.00436	-2.91507	-3.94555	0.00010399	0.00357502	1.1087
ENSG00000152767.16	chr13	FARP1	-1.10162	0.505532	-3.98207	9.01e-05	0.00318312	1.10414
ENSG00000125384.7	chr14	PTGER2	0.829076	2.65941	4.0436	7.05e-05	0.00262605	1.10319
ENSG00000185215.9	chr14	TNFAIP2	1.13226	4.67247	4.12243	5.13e-05	0.00207643	1.09989
ENSG00000133800.8	chr11	LYVE1	-2.14445	-1.21038	-3.9513	0.00010168	0.00351719	1.08908
ENSG00000214222.2	chr13	TUBBP2	-0.942082	-0.583391	-3.95353	0.00010079	0.00350068	1.0666
ENSG00000100206.10	chr22	DMC1	-1.22402	-0.638294	-3.94898	0.00010261	0.00353941	1.05313
ENSG00000126583.11	chr19	PRKCG	-1.91045	-2.00629	-3.93193	0.0001097	0.0037328	1.04928
ENSG00000165912.16	chr11	PACSIN3	-1.41361	-0.980473	-3.94115	0.00010581	0.00361876	1.04226
ENSG00000101311.15	chr20	FERMT1	-1.81004	-3.84362	-3.92948	0.00011075	0.00374975	1.03943
ENSG00000147852.16	chr9	VLDLR	-2.02972	-0.87415	-3.94134	0.00010573	0.00361876	1.03775
ENSG00000167850.3	chr17	CD300C	1.17189	1.67454	3.99054	8.71e-05	0.00310004	1.03029
ENSG00000090932.10	chr19	DLL3	-1.53327	-0.733387	-3.93937	0.00010655	0.003638	1.02362
ENSG00000165066.12	chr8	NKX6-3	-2.15161	-2.09389	-3.91826	0.00011572	0.00390466	1.00363
ENSG00000131094.4	chr17	C1QL1	-1.82941	-3.72589	-3.91705	0.00011626	0.0039166	1.00046
ENSG00000157168.19	chr8	NRG1	1.57455	0.509245	3.9415	0.00010566	0.00361876	0.956609
ENSG00000254855.1	chr11	AP001107.8	1.65212	-2.25806	3.90057	0.00012397	0.00408073	0.945748
ENSG00000107317.13	chr9	PTGDS	1.81892	-3.571	3.89536	0.00012651	0.0041506	0.930274
ENSG00000226091.7	chr12	LINC00937	1.93115	-1.87292	3.89316	0.00012759	0.00417258	0.909661
ENSG00000227825.4	chr12	SLC9A7P1	1.25305	-0.330107	3.91346	0.0001179	0.00394546	0.909463
ENSG00000132821.12	chr20	VSTM2L	2.55384	-2.32455	3.88658	0.00013089	0.004246	0.898642
ENSG00000248429.5	chr4	FAM198B-AS1	1.49687	-1.47086	3.8939	0.00012723	0.0041674	0.897307
ENSG00000103647.12	chr15	CORO2B	-2.22834	4.44577	-4.05975	6.61e-05	0.0025088	0.88807
ENSG00000260802.1	chrX	SERTM2	2.26278	-4.64626	3.89261	0.00012786	0.00417469	0.882169
ENSG00000116883.8	chr1	AL591845.1	1.58112	0.0886921	3.91232	0.00011843	0.00395637	0.880368
ENSG00000152207.7	chr13	CYSLTR2	1.20091	-0.582697	3.8995	0.00012449	0.00409102	0.873757
ENSG00000111728.10	chr12	ST8SIA1	1.71211	-1.05482	3.89075	0.00012879	0.00419272	0.867227
ENSG00000162063.13	chr16	CCNF	-0.810689	3.57825	-4.01898	7.78e-05	0.00282916	0.866459
ENSG00000020181.17	chr8	ADGRA2	1.09411	0.00950015	3.90589	0.00012143	0.00405	0.862369
ENSG00000123473.15	chr1	STIL	-0.873407	2.68565	-3.97754	9.17e-05	0.00322372	0.853421
ENSG00000151376.16	chr11	ME3	-1.4358	-0.236278	-3.88683	0.00013076	0.004246	0.80937
ENSG00000111321.11	chr12	LTBR	0.836014	2.42911	3.95102	0.00010179	0.00351719	0.792216
ENSG00000178562.18	chr2	CD28	1.39669	0.976271	3.90385	0.0001224	0.00406452	0.783337
ENSG00000165507.8	chr10	DEPP1	-1.58527	3.2201	-3.97992	9.08e-05	0.00320476	0.779476
ENSG00000104093.13	chr15	DMXL2	0.977387	3.93888	4.00775	8.14e-05	0.00294766	0.765927
ENSG00000118777.12	chr4	ABCG2	-1.48513	-0.566893	-3.86752	0.00014091	0.00449864	0.759864
ENSG00000197061.4	chr6	HIST1H4C	-1.42397	-1.47155	-3.85179	0.00014972	0.00471276	0.750319
ENSG00000125319.14	chr17	C17orf53	-0.870827	0.638505	-3.87736	0.00013565	0.00437227	0.716613
ENSG00000176532.4	chr7	PRR15	-1.67759	-2.96952	-3.82951	0.0001631	0.00503928	0.711543
ENSG00000269243.1	chr19	AC008894.2	-1.24795	-1.91089	-3.83304	0.00016091	0.00500231	0.702692
ENSG00000115523.16	chr2	GNLY	1.50201	2.10929	3.91392	0.00011769	0.00394482	0.699002
ENSG00000151012.13	chr4	SLC7A11	-1.79093	-1.27578	-3.83892	0.00015732	0.0049058	0.696653
ENSG00000272282.1	chr3	LINC02084	1.69137	-2.76082	3.8231	0.00016715	0.00511747	0.688221
ENSG00000154839.10	chr18	SKA1	-0.960998	-0.125866	-3.84997	0.00015078	0.0047385	0.672436
ENSG00000275714.1	chr6	HIST1H3A	-1.02636	-0.646916	-3.83964	0.00015688	0.0049058	0.66646
ENSG00000276023.5	chr17	DUSP14	-1.04876	-1.24397	-3.82806	0.00016401	0.00504559	0.657438
ENSG00000178531.6	chr19	CTXN1	-1.71666	-2.8971	-3.80726	0.00017759	0.00539591	0.636068
ENSG00000082014.16	chr7	SMARCD3	1.05636	1.94099	3.89067	0.00012883	0.00419272	0.635573
ENSG00000133246.12	chr19	PRAM1	0.89839	3.17296	3.93599	0.00010797	0.00368013	0.625018
ENSG00000237594.2	chr21	AP000251.1	-2.00937	-3.12595	-3.80316	0.00018038	0.00543983	0.623443
ENSG00000198478.8	chr6	SH3BGRL2	1.3577	-0.107694	3.83438	0.00016008	0.00498423	0.616538
ENSG00000163220.11	chr1	S100A9	0.849169	7.88053	4.02209	7.68e-05	0.00280447	0.616254
ENSG00000173762.8	chr17	CD7	1.2533	1.80277	3.87976	0.0001344	0.00434576	0.612603
ENSG00000152953.13	chr4	STK32B	-1.80325	1.63959	-3.87333	0.00013778	0.00441967	0.607987
ENSG00000067177.15	chrX	PHKA1	-1.41638	-0.137819	-3.82799	0.00016405	0.00504559	0.595978
ENSG00000136689.18	chr2	IL1RN	1.03669	1.52157	3.86626	0.0001416	0.00451344	0.595445
ENSG00000007314.12	chr17	SCN4A	0.917322	2.63543	3.90074	0.00012389	0.00408073	0.579366
ENSG00000158966.15	chr1	CACHD1	-1.44679	-2.52481	-3.7917	0.00018842	0.00562597	0.578487
ENSG00000168995.13	chr19	SIGLEC7	0.81562	1.24063	3.85269	0.0001492	0.00470403	0.575747
ENSG00000162174.12	chr11	ASRGL1	-0.909141	1.88994	-3.87127	0.00013888	0.00444099	0.571842
ENSG00000176928.6	chr5	GCNT4	1.58416	-1.4682	3.79574	0.00018556	0.00557086	0.556664
ENSG00000255197.5	chr11	AC090559.1	0.854222	1.44585	3.85267	0.00014921	0.00470403	0.55492
ENSG00000170955.10	chr11	CAVIN3	1.39579	-2.37726	3.78472	0.00019349	0.00571026	0.551694
ENSG00000135547.9	chr6	HEY2	-1.5861	-3.31907	-3.7791	0.00019766	0.00581302	0.543214
ENSG00000122778.9	chr7	KIAA1549	-1.46868	-1.94847	-3.78419	0.00019389	0.00571026	0.537005
ENSG00000229989.3	chr1	MIR181A1HG	-1.80905	-2.65241	-3.77771	0.00019871	0.00583367	0.533722
ENSG00000197182.14	chr22	MIRLET7BHG	0.973406	1.03398	3.82881	0.00016354	0.00504516	0.510591
ENSG00000125845.7	chr20	BMP2	-1.66591	-1.81709	-3.7774	0.00019894	0.00583367	0.509007
ENSG00000160185.15	chr21	UBASH3A	1.50252	-0.192297	3.79898	0.00018328	0.00551074	0.498077
ENSG00000143797.12	chr2	MBOAT2	-1.13963	2.17923	-3.8606	0.00014472	0.00459118	0.497516
ENSG00000162444.12	chr1	RBP7	1.03041	0.273758	3.79938	0.000183	0.00551056	0.46869
ENSG00000131773.14	chr8	KHDRBS3	-1.62929	-0.114338	-3.78759	0.00019139	0.00568677	0.453637
ENSG00000178789.9	chr17	CD300LB	1.14569	1.59162	3.82755	0.00016433	0.00504627	0.449926
ENSG00000133055.9	chr1	MYBPH	-1.92938	-3.35456	-3.74252	0.00022696	0.00645781	0.422434
ENSG00000278023.6	chr17	RDM1	-1.64682	-2.78498	-3.73909	0.00022991	0.00652329	0.407036
ENSG00000017427.16	chr12	IGF1	-1.27355	3.1108	-3.86127	0.00014435	0.00458672	0.363007
ENSG00000244482.10	chr19	LILRA6	1.33333	0.46376	3.77125	0.00020363	0.00591937	0.356748
ENSG00000170323.8	chr8	FABP4	-2.03723	-1.68596	-3.73183	0.00023628	0.00667571	0.349287
ENSG00000140678.16	chr16	ITGAX	1.20893	4.95518	3.92999	0.00011053	0.00374864	0.346442
ENSG00000121933.19	chr1	TMIGD3	-1.54699	-1.60139	-3.72991	0.00023798	0.00671441	0.338998
ENSG00000072201.13	chr4	LNX1	-1.52802	-2.20331	-3.71594	0.00025078	0.00700688	0.316064
ENSG00000253250.3	chr8	C8orf88	-1.22088	1.11739	-3.77277	0.00020247	0.00589404	0.305842
ENSG00000177990.11	chr12	DPY19L2	-1.7861	-1.96082	-3.70724	0.00025907	0.00717884	0.278364
ENSG00000167286.9	chr11	CD3D	1.36354	1.07634	3.76264	0.00021037	0.00607161	0.274447
ENSG00000267374.1	chr18	AC016205.1	-1.60575	-3.69086	-3.69336	0.00027284	0.00743092	0.260876
ENSG00000181938.13	chr16	GINS3	-0.845595	2.15555	-3.78998	0.00018967	0.00565211	0.249147
ENSG00000255299.5	chr11	AP003557.1	1.08231	-1.51353	3.7031	0.00026311	0.00725082	0.244618
ENSG00000211665.3	chr22	IGLV3-16	-1.55666	-1.19012	-3.70484	0.00026141	0.0072184	0.2336
ENSG00000196368.5	chrX	NUDT11	-1.5152	-0.833162	-3.70975	0.00025665	0.00712158	0.230026
ENSG00000276368.1	chr6	HIST1H2AJ	-1.66581	-3.15575	-3.67329	0.00029398	0.00776171	0.195661
ENSG00000137441.8	chr4	FGFBP2	1.42201	0.161255	3.71606	0.00025067	0.00700688	0.188691
ENSG00000258794.3	chr12	DUX4L27	-1.92394	-3.67503	-3.67002	0.00029756	0.00784608	0.185933
ENSG00000157927.16	chr7	RADIL	-1.70767	-3.64161	-3.66858	0.00029916	0.00785733	0.181479
ENSG00000165349.12	chrX	SLC7A3	-1.92441	-0.510088	-3.70095	0.00026523	0.00728932	0.180962
ENSG00000118804.8	chr4	STBD1	-1.43111	-3.78307	-3.66708	0.00030082	0.00789077	0.175714
ENSG00000154914.17	chr17	USP43	-1.58592	-2.771	-3.66879	0.00029893	0.00785733	0.175469
ENSG00000008517.16	chr16	IL32	1.35765	2.42967	3.77596	0.00020004	0.00585714	0.162367
ENSG00000127954.12	chr7	STEAP4	1.2725	1.58052	3.74539	0.00022453	0.00641825	0.162355
ENSG00000179542.16	chrX	SLITRK4	1.10272	-0.743588	3.69022	0.00027606	0.00746461	0.158746
ENSG00000105352.10	chr19	CEACAM4	1.25604	-0.776661	3.68922	0.00027708	0.00747225	0.157356
ENSG00000134909.18	chr11	ARHGAP32	-1.11918	1.79175	-3.74811	0.00022224	0.00638662	0.147522
ENSG00000065618.20	chr10	COL17A1	-1.8849	-1.12617	-3.677	0.00028995	0.00767651	0.13657
ENSG00000144283.21	chr2	PKP4	-1.04916	2.60457	-3.7754	0.00020045	0.00586088	0.135131
ENSG00000158186.13	chr3	MRAS	1.0271	0.151034	3.69717	0.00026899	0.00737264	0.124968
ENSG00000155974.12	chr12	GRIP1	-1.33681	-2.82827	-3.65237	0.00031765	0.0081933	0.123159
ENSG00000204060.7	chr1	FOXO6	-2.68408	-2.60738	-3.65254	0.00031744	0.0081933	0.118815
ENSG00000197905.9	chr12	TEAD4	-1.81138	-3.068	-3.64897	0.00032166	0.00827574	0.115976
ENSG00000163519.13	chr3	TRAT1	1.36004	-0.144286	3.68314	0.00028342	0.00756324	0.097499
ENSG00000122378.14	chr10	PRXL2A	-0.962433	3.49944	-3.80426	0.00017963	0.00543337	0.0941598
ENSG00000131650.14	chr16	KREMEN2	-1.64982	0.314937	-3.68742	0.00027894	0.00749225	0.0798475
ENSG00000260244.1	chr4	AC104083.1	-1.53356	-1.36417	-3.65594	0.00031348	0.00813797	0.0794897
ENSG00000104783.13	chr19	KCNN4	0.909064	6.41829	3.87389	0.00013748	0.00441716	0.0712927
ENSG00000123094.15	chr12	RASSF8	-1.67038	0.158207	-3.68124	0.00028543	0.00760337	0.0703219
ENSG00000143942.5	chr2	CHAC2	-0.838178	1.35412	-3.71054	0.00025589	0.00711034	0.0661655
ENSG00000120256.10	chr6	LRP11	-1.33528	-2.51255	-3.63673	0.00033651	0.00855922	0.0647767
ENSG00000213889.10	chr19	PPM1N	0.811703	0.748067	3.69246	0.00027376	0.00744248	0.0621125
ENSG00000166523.7	chr12	CLEC4E	1.08947	1.60925	3.71376	0.00025283	0.00705443	0.0494353
ENSG00000095777.16	chr10	MYO3A	-2.04371	-1.13829	-3.64776	0.00032309	0.00829136	0.039701
ENSG00000064270.12	chr16	ATP2C2	-2.00307	-2.76575	-3.62543	0.00035077	0.00877792	0.0346434
ENSG00000106565.18	chr7	TMEM176B	1.6063	3.62963	3.78632	0.00019232	0.0056976	0.00843229
ENSG00000159450.12	chr1	TCHH	-1.69953	-4.04248	-3.61258	0.00036769	0.00902207	0.0002824
ENSG00000196562.14	chr20	SULF2	1.03727	3.71471	3.78699	0.00019183	0.00569141	-0.0034054
ENSG00000116990.11	chr1	MYCL	1.15859	1.34353	3.68948	0.00027681	0.00747225	-0.0051168
ENSG00000196329.11	chr7	GIMAP5	1.87853	-1.90786	3.6195	0.00035848	0.00890461	-0.0135998
ENSG00000099139.13	chr9	PCSK5	1.17387	-0.266068	3.64646	0.00032465	0.00831002	-0.0180649
ENSG00000113088.5	chr5	GZMK	1.40818	1.44251	3.68707	0.00027931	0.00749225	-0.0239701
ENSG00000253535.5	chr8	AC120193.1	-1.09564	-0.718227	-3.63457	0.00033918	0.00859471	-0.0292227
ENSG00000147588.7	chr8	PMP2	-1.84357	-4.09874	-3.60016	0.00038477	0.00937275	-0.0393395
ENSG00000197405.8	chr19	C5AR1	0.89542	4.90012	3.82211	0.00016779	0.00512917	-0.0413152
ENSG00000186205.13	chr1	MARC1	0.964383	0.449857	3.6537	0.00031609	0.00818472	-0.0448517
ENSG00000211751.9	chr7	TRBC1	1.29266	1.75261	3.6886	0.00027773	0.00747966	-0.0539146
ENSG00000197520.10	chr1	FAM177B	1.22228	3.17071	3.74601	0.000224	0.00641825	-0.057288
ENSG00000099864.18	chr19	PALM	-1.63537	-0.518684	-3.62945	0.00034564	0.00871259	-0.0587299
ENSG00000105048.17	chr19	TNNT1	1.57451	-1.30954	3.61501	0.00036443	0.00897486	-0.0588575
ENSG00000124491.15	chr6	F13A1	0.972345	4.20352	3.79213	0.00018812	0.00562597	-0.0628198
ENSG00000150760.12	chr10	DOCK1	-0.975576	-0.86103	-3.62094	0.0003566	0.00886867	-0.0657338
ENSG00000113749.7	chr5	HRH2	0.858215	2.48462	3.71213	0.00025438	0.00707807	-0.0688429
ENSG00000133687.16	chr12	TMTC1	1.3906	-0.308074	3.62902	0.00034617	0.00871259	-0.0736377
ENSG00000186431.19	chr19	FCAR	1.12898	0.783158	3.65081	0.00031948	0.00822996	-0.0825451
ENSG00000127533.3	chr19	F2RL3	-1.22625	-0.869535	-3.61551	0.00036377	0.00896949	-0.0831913
ENSG00000153253.17	chr2	SCN3A	-1.42973	1.23895	-3.66152	0.00030709	0.00800293	-0.0897896
ENSG00000235576.1	chr2	LINC01871	1.54432	-3.0943	3.58019	0.00041381	0.0098421	-0.103836
ENSG00000275379.1	chr6	HIST1H3I	-1.67614	-3.19429	-3.57841	0.00041651	0.0098713	-0.10801
ENSG00000152192.8	chr13	POU4F1	-1.48453	-0.400826	-3.61445	0.00036519	0.00898251	-0.116136
ENSG00000161800.13	chr12	RACGAP1	-0.865291	4.0699	-3.76976	0.00020478	0.00594429	-0.122098
ENSG00000181036.14	chr1	FCRL6	1.43785	-0.0515524	3.61822	0.00036017	0.00892458	-0.126876
ENSG00000185760.15	chr6	KCNQ5	-1.35055	2.31572	-3.6831	0.00028346	0.00756324	-0.145276
ENSG00000225528.3	chr22	Z82206.1	1.16777	-1.76304	3.57954	0.0004148	0.00985394	-0.150555
ENSG00000187164.20	chr10	SHTN1	0.920109	1.92334	3.66473	0.00030345	0.00792877	-0.15657
ENSG00000118113.12	chr11	MMP8	-1.97279	3.33301	-3.72239	0.00024479	0.00685859	-0.167122
ENSG00000090382.6	chr12	LYZ	0.934158	9.1035	3.80462	0.00017938	0.00543337	-0.173729
ENSG00000185686.18	chr22	PRAME	2.2487	-1.9694	3.56547	0.00043653	0.0102613	-0.18617
ENSG00000128040.11	chr4	SPINK2	-1.33173	-2.32402	-3.5602	0.00044495	0.0104105	-0.188333
ENSG00000211801.3	chr14	TRAV21	1.66785	-3.50562	3.5516	0.000459	0.0106651	-0.189184
ENSG00000227039.6	chr21	ITGB2-AS1	1.1262	3.30333	3.71314	0.00025342	0.00706097	-0.194449
ENSG00000198734.10	chr1	F5	1.03185	2.61036	3.68079	0.00028591	0.00760337	-0.195841
ENSG00000139354.11	chr12	GAS2L3	-1.11867	0.0478251	-3.59928	0.00038602	0.00939179	-0.196911
ENSG00000180767.9	chr3	CHST13	1.14186	-0.50002	3.58374	0.00040851	0.00976217	-0.211298
ENSG00000235532.1	chr13	LINC00402	1.80935	-1.66613	3.5607	0.00044413	0.0104105	-0.216485
ENSG00000180739.14	chr19	S1PR5	1.27776	0.189024	3.59573	0.00039105	0.00947243	-0.218986
ENSG00000188610.12	chr1	FAM72B	-0.934412	0.936843	-3.6093	0.00037213	0.00911988	-0.236405
ENSG00000116824.5	chr1	CD2	1.32585	1.81053	3.63619	0.00033717	0.00856524	-0.239925
ENSG00000178498.16	chr12	DTX3	1.17032	3.81065	3.72421	0.00024313	0.00683096	-0.241003
ENSG00000197153.4	chr6	HIST1H3J	-1.47169	-3.10244	-3.53507	0.00048719	0.0111275	-0.246092
ENSG00000121297.7	chr19	TSHZ3	1.15804	0.551042	3.59561	0.00039122	0.00947243	-0.247901
ENSG00000156234.7	chr4	CXCL13	2.50912	-1.99092	3.53982	0.00047892	0.0109885	-0.267531
ENSG00000128917.8	chr15	DLL4	-1.71529	-1.94982	-3.53985	0.00047887	0.0109885	-0.269355
ENSG00000111052.7	chr12	LIN7A	0.868613	0.989237	3.60056	0.00038421	0.00937047	-0.270688
ENSG00000118523.6	chr6	CCN2	-1.88575	1.83127	-3.6275	0.00034812	0.00873325	-0.271942
ENSG00000179299.17	chr4	NSUN7	-1.35544	-0.722295	-3.55682	0.00045042	0.0105019	-0.285267
ENSG00000160654.10	chr11	CD3G	1.44158	1.03119	3.59706	0.00038916	0.00944529	-0.286468
ENSG00000102001.12	chrX	CACNA1F	1.09327	0.69982	3.58773	0.00040261	0.00964408	-0.286874
ENSG00000168329.13	chr3	CX3CR1	1.57087	3.32423	3.68647	0.00027993	0.00749892	-0.290729
ENSG00000281162.2	chr2	LINC01127	1.53625	-2.76698	3.52148	0.00051157	0.01144	-0.29664
ENSG00000233999.3	chr2	IGKV3OR2-268	-1.61232	-1.58351	-3.53589	0.00048575	0.0111099	-0.300924
ENSG00000136492.8	chr17	BRIP1	-0.933767	2.04992	-3.6267	0.00034914	0.00874805	-0.302325
ENSG00000150681.10	chr1	RGS18	0.989078	2.40234	3.64022	0.0003322	0.00847312	-0.304519
ENSG00000197540.8	chr19	GZMM	1.08324	0.910334	3.58785	0.00040244	0.00964408	-0.305624
ENSG00000145358.6	chr4	DDIT4L	-1.54522	-3.78176	-3.51227	0.00052875	0.0117052	-0.309993
ENSG00000197472.15	chr1	ZNF695	-1.61106	-2.60661	-3.51819	0.00051764	0.0115352	-0.311862
ENSG00000249096.6	chr4	LINC02362	-1.3453	2.49853	-3.64153	0.00033061	0.00845195	-0.314016
ENSG00000184305.15	chr4	CCSER1	-1.78298	-0.801026	-3.54637	0.00046775	0.0108059	-0.314281
ENSG00000123405.14	chr12	NFE2	0.978489	2.48253	3.63775	0.00033524	0.00853773	-0.324553
ENSG00000285596.1	chr7	AC017116.2	0.857447	-0.533978	3.5485	0.00046417	0.0107479	-0.32461
ENSG00000037280.16	chr5	FLT4	1.42521	-1.47181	3.52298	0.00050882	0.0114181	-0.348698
ENSG00000140511.11	chr15	HAPLN3	1.04871	0.365927	3.56034	0.00044471	0.0104105	-0.349719
ENSG00000180902.18	chr2	D2HGDH	0.809729	4.60498	3.72559	0.00024187	0.00680515	-0.352556
ENSG00000234883.5	chr21	MIR155HG	0.808598	3.93407	3.69512	0.00027106	0.00740898	-0.362892
ENSG00000075223.14	chr7	SEMA3C	0.989698	-0.501124	3.53453	0.00048814	0.011131	-0.372273
ENSG00000260188.1	chr6	AC002464.1	-1.36003	-2.26902	-3.49616	0.0005601	0.0122245	-0.393894
ENSG00000128383.13	chr22	APOBEC3A	1.20848	1.80533	3.59015	0.00039908	0.00959361	-0.394714
ENSG00000258857.1	chr14	AL359397.1	1.72685	-1.37107	3.50957	0.00053388	0.011767	-0.397613
ENSG00000089012.14	chr20	SIRPG	1.44049	-0.425631	3.52515	0.00050488	0.0113767	-0.407779
ENSG00000257179.1	chr14	HMGN2P6	-0.898298	-2.4379	-3.48764	0.00057736	0.0124394	-0.413879
ENSG00000211778.2	chr14	TRAV4	1.62141	-3.75145	3.47722	0.00059918	0.0127613	-0.417497
ENSG00000256568.1	chr11	AP002761.2	-1.28414	-2.73712	-3.48184	0.0005894	0.0126046	-0.421629
ENSG00000198851.9	chr11	CD3E	1.29526	3.0415	3.63002	0.0003449	0.00870681	-0.437903
ENSG00000225855.6	chr1	RUSC1-AS1	0.888495	0.23975	3.52408	0.00050683	0.0113951	-0.458793
ENSG00000011422.12	chr19	PLAUR	1.17683	3.69101	3.65535	0.00031416	0.00814517	-0.460374
ENSG00000186439.13	chr6	TRDN	-1.87276	-3.85828	-3.45478	0.00064876	0.0134587	-0.485237
ENSG00000135740.17	chr16	SLC9A5	1.29842	-0.451693	3.49929	0.00055387	0.0121148	-0.489706
ENSG00000226660.2	chr7	TRBV2	1.6002	-3.40713	3.45411	0.00065031	0.013464	-0.491566
ENSG00000162692.12	chr1	VCAM1	-1.81689	3.4145	-3.63159	0.00034293	0.0086678	-0.495042
ENSG00000102962.5	chr16	CCL22	1.74794	2.69455	3.59494	0.00039218	0.00948442	-0.501785
ENSG00000153563.15	chr2	CD8A	1.26344	2.36908	3.57871	0.00041606	0.0098713	-0.508008
ENSG00000134363.12	chr5	FST	2.43742	-3.08561	3.45051	0.00065862	0.0136082	-0.508939
ENSG00000234880.1	chr21	LINC00163	-1.85285	-3.80304	-3.44675	0.00066742	0.0137421	-0.509771
ENSG00000257698.1	chr12	GIHCG	-0.836956	1.42494	-3.53914	0.0004801	0.011003	-0.520172
ENSG00000268204.1	chr19	AC008763.1	0.963501	-0.555804	3.48454	0.00058377	0.0125507	-0.530138
ENSG00000273802.2	chr6	HIST1H2BG	-0.892055	1.3844	-3.53435	0.00048845	0.011131	-0.531493
ENSG00000100351.16	chr22	GRAP2	1.20088	3.18384	3.60817	0.00037367	0.00914655	-0.535942
ENSG00000124731.13	chr6	TREM1	1.14442	2.75916	3.58698	0.00040372	0.00965914	-0.538703
ENSG00000174776.11	chr3	WDR49	-1.40478	-1.51757	-3.46149	0.00063354	0.0132256	-0.541744
ENSG00000113721.14	chr5	PDGFRB	1.27886	0.650877	3.50241	0.00054773	0.0120196	-0.563465
ENSG00000151650.8	chr10	VENTX	1.33992	-0.183577	3.48193	0.00058921	0.0126046	-0.564134
ENSG00000180644.8	chr10	PRF1	1.24237	2.82672	3.58225	0.00041073	0.00979193	-0.565312
ENSG00000172005.11	chr2	MAL	1.28625	-0.0553704	3.48418	0.00058452	0.0125535	-0.566086
ENSG00000117266.15	chr1	CDK18	-0.917893	1.34251	-3.51762	0.0005187	0.0115462	-0.581988
ENSG00000180998.12	chr14	GPR137C	-1.37223	-2.59622	-3.42948	0.00070929	0.0143604	-0.588685
ENSG00000272734.1	chr10	ADIRF-AS1	1.24634	1.38322	3.51602	0.00052169	0.011587	-0.591717
ENSG00000257341.5	chr14	AL928654.3	1.5703	-3.4496	3.41704	0.00074093	0.0147783	-0.603516
ENSG00000075702.18	chr19	WDR62	-0.833792	2.59166	-3.55739	0.00044949	0.0104923	-0.612271
ENSG00000111344.11	chr12	RASAL1	-1.74754	2.09663	-3.53582	0.00048587	0.0111099	-0.613388
ENSG00000180139.11	chr10	ACTA2-AS1	0.903404	0.596922	3.4855	0.00058179	0.0125216	-0.613661
ENSG00000173320.12	chr4	STOX2	-1.47491	-3.12096	-3.41354	0.00075008	0.0149165	-0.621025
ENSG00000225101.6	chr11	OR52K3P	1.30515	-1.16222	3.44007	0.00068335	0.0139524	-0.631515
ENSG00000089169.15	chr12	RPH3A	1.419	0.335213	3.47286	0.00060851	0.0128901	-0.632463
ENSG00000119686.10	chr14	FLVCR2	0.814992	1.80205	3.51523	0.00052316	0.0116069	-0.643429
ENSG00000121769.7	chr1	FABP3	-1.66529	-0.620644	-3.44629	0.00066852	0.0137421	-0.64788
ENSG00000280237.3	chr11	MIR4697HG	1.74324	-2.65921	3.40829	0.00076398	0.0150591	-0.65139
ENSG00000211952.3	chr14	IGHV4-28	-1.66625	-2.26915	-3.41224	0.00075351	0.0149552	-0.655476
ENSG00000253305.2	chr5	PCDHGB6	1.55799	-0.305168	3.44887	0.00066246	0.0136594	-0.661438
ENSG00000087258.15	chr16	GNAO1	1.90316	0.56881	3.46803	0.00061904	0.0130133	-0.667671
ENSG00000133101.10	chr13	CCNA1	-1.4099	-2.92857	-3.39953	0.00078775	0.0153178	-0.669008
ENSG00000136250.11	chr7	AOAH	0.858599	4.3414	3.62366	0.00035305	0.00882287	-0.671902
ENSG00000172116.22	chr2	CD8B	1.28552	0.660372	3.46881	0.00061732	0.0130133	-0.673224
ENSG00000005961.18	chr17	ITGA2B	1.37214	2.39002	3.52143	0.00051166	0.01144	-0.702035
ENSG00000274515.1	chr15	AC105020.5	1.21387	-3.3963	3.38462	0.00082974	0.0158436	-0.70212
ENSG00000204577.11	chr19	LILRB3	1.03531	2.27582	3.51614	0.00052147	0.011587	-0.703195
ENSG00000137462.7	chr4	TLR2	0.909173	3.53379	3.57544	0.00042103	0.00996664	-0.706285
ENSG00000233901.5	chr9	LINC01503	0.969584	-0.861457	3.42101	0.0007307	0.0146537	-0.711491
ENSG00000087586.17	chr20	AURKA	-0.96945	2.15579	-3.50847	0.00053599	0.0118006	-0.711833
ENSG00000070388.11	chr19	FGF22	1.34067	-3.03871	3.38367	0.00083249	0.0158811	-0.713739
ENSG00000256988.1	chr12	AC005833.2	-1.69555	-3.6977	-3.37782	0.00084961	0.0161314	-0.717548
ENSG00000112414.14	chr6	ADGRG6	-1.68819	-1.56474	-3.40249	0.00077964	0.0152189	-0.723672
ENSG00000253731.2	chr5	PCDHGA6	1.11443	1.01838	3.46306	0.00063004	0.0131662	-0.725819
ENSG00000134539.17	chr12	KLRD1	1.26446	0.916616	3.45966	0.00063767	0.0132843	-0.726722
ENSG00000253873.6	chr5	PCDHGA11	1.55728	-1.20171	3.40787	0.0007651	0.0150665	-0.729978
ENSG00000246528.3	chr8	AC079089.1	-1.70996	-3.07926	-3.37718	0.00085149	0.0161367	-0.732167
ENSG00000163803.13	chr2	PLB1	0.805108	1.30879	3.47044	0.00061377	0.0129879	-0.732357
ENSG00000119457.8	chr9	SLC46A2	1.26492	-0.386842	3.42358	0.00072413	0.0145731	-0.735995
ENSG00000144485.11	chr2	HES6	-0.849797	2.09938	-3.4975	0.00055741	0.012179	-0.740248
ENSG00000116885.18	chr1	OSCP1	-0.801985	-1.12855	-3.40513	0.00077248	0.0151232	-0.743384
ENSG00000006071.13	chr11	ABCC8	2.1797	-3.44161	3.37024	0.00087225	0.0164372	-0.74428
ENSG00000105374.10	chr19	NKG7	0.987085	3.16463	3.54513	0.00046985	0.0108297	-0.74531
ENSG00000186314.11	chr5	PRELID2	-1.2357	-0.62171	-3.41503	0.00074617	0.014868	-0.746659
ENSG00000109265.14	chr4	KIAA1211	-1.0989	-1.34002	-3.39572	0.00079827	0.015433	-0.758846
ENSG00000127530.3	chr19	OR7C1	-1.58967	-3.73334	-3.3617	0.00089843	0.0166964	-0.76494
ENSG00000165449.11	chr10	SLC16A9	-1.41501	-0.577611	-3.41004	0.00075933	0.0150121	-0.765435
ENSG00000135929.9	chr2	CYP27A1	1.01112	2.23205	3.49485	0.00056271	0.0122681	-0.767178
ENSG00000108700.5	chr17	CCL8	-2.00635	-2.42357	-3.37254	0.00086532	0.0163526	-0.770092
ENSG00000165028.12	chr9	NIPSNAP3B	0.857987	3.89378	3.56821	0.00043221	0.0101716	-0.791461
ENSG00000150687.12	chr11	PRSS23	1.20362	-0.786006	3.39474	0.000801	0.0154561	-0.799043
ENSG00000145147.20	chr4	SLIT2	1.481	-3.16566	3.35218	0.00092847	0.0171283	-0.804734
ENSG00000214140.11	chr17	PRCD	0.806232	3.24452	3.53087	0.0004946	0.0112003	-0.806396
ENSG00000233410.1	chr1	LINC01222	-1.67367	-4.05082	-3.34652	0.00094678	0.0173075	-0.806744
ENSG00000196876.15	chr12	SCN8A	1.50251	-0.0279115	3.40892	0.00076231	0.0150471	-0.808335
ENSG00000172296.13	chr20	SPTLC3	-1.81222	-1.7397	-3.36915	0.00087555	0.0164534	-0.816115
ENSG00000272839.1	chr7	AC011899.3	1.28299	-3.24115	3.34167	0.00096276	0.0175043	-0.834045
ENSG00000122966.16	chr12	CIT	-0.885371	2.58515	-3.4894	0.00057376	0.0124266	-0.836774
ENSG00000014914.21	chr1	MTMR11	1.01372	0.699371	3.41826	0.00073778	0.0147738	-0.838894
ENSG00000128965.13	chr15	CHAC1	-1.05174	0.683053	-3.41732	0.00074022	0.0147783	-0.840399
ENSG00000173369.16	chr1	C1QB	-1.60668	3.20183	-3.51826	0.00051752	0.0115352	-0.841146
ENSG00000158825.6	chr1	CDA	0.812166	1.83456	3.4553	0.00064757	0.0134563	-0.843382
ENSG00000114631.11	chr3	PODXL2	-1.18404	1.85584	-3.45356	0.00065157	0.0134763	-0.851743
ENSG00000134780.10	chr11	DAGLA	1.08827	-1.08739	3.36995	0.00087311	0.0164381	-0.855595
ENSG00000066735.14	chr14	KIF26A	-1.27252	0.0948289	-3.3965	0.00079612	0.0154061	-0.856911
ENSG00000072422.17	chr10	RHOBTB1	-1.15458	0.54463	-3.4065	0.0007688	0.0151098	-0.862391
ENSG00000272694.1	chr22	Z94160.2	2.00531	-1.19469	3.36216	0.00089701	0.0166891	-0.872435
ENSG00000267543.1	chr17	AC015802.3	1.26894	-1.58476	3.35189	0.00092942	0.01713	-0.878527
ENSG00000174358.16	chr5	SLC6A19	-1.68538	-3.61103	-3.32282	0.00102717	0.0182955	-0.881498
ENSG00000159714.11	chr16	ZDHHC1	0.864796	-0.272749	3.37364	0.00086202	0.0163056	-0.90117
ENSG00000149926.13	chr16	FAM57B	-1.63809	-3.09575	-3.32006	0.00103694	0.0183883	-0.902391
ENSG00000184185.10	chr17	KCNJ12	-1.36921	-3.44711	-3.315	0.00105506	0.0185353	-0.907855
ENSG00000184194.5	chrX	GPR173	-1.6436	-2.12193	-3.3316	0.00099667	0.0179587	-0.908986
ENSG00000103942.13	chr15	HOMER2	1.23313	3.10048	3.48926	0.00057405	0.0124266	-0.920067
ENSG00000153789.13	chr16	FAM92B	-2.10612	-0.0477042	-3.36666	0.00088313	0.0165341	-0.939648
ENSG00000218565.2	chr6	AL592429.1	1.31344	-1.07849	3.34048	0.00096669	0.0175599	-0.947115
ENSG00000196503.4	chr4	ARL9	-1.33134	-1.69653	-3.3262	0.00101534	0.0181777	-0.949927
ENSG00000013297.11	chr3	CLDN11	1.18101	-2.08322	3.31721	0.0010471	0.0184548	-0.954514
ENSG00000163462.18	chr1	TRIM46	1.22881	-0.0929817	3.35928	0.00090599	0.0168088	-0.959271
ENSG00000198121.13	chr9	LPAR1	1.21822	-0.646359	3.34222	0.00096092	0.0174867	-0.972027
ENSG00000268518.1	chr19	AC020909.2	1.36042	-4.12882	3.28813	0.00115634	0.0196082	-0.975743
ENSG00000198795.11	chr18	ZNF521	-1.29385	-2.57658	-3.29678	0.00112278	0.019332	-0.991172
ENSG00000175556.16	chrX	LONRF3	1.3708	-1.27193	3.32087	0.00103405	0.0183533	-0.993876
ENSG00000271503.6	chr17	CCL5	1.00386	2.40109	3.43053	0.00070667	0.0143219	-1.00112
ENSG00000162188.6	chr11	GNG3	-1.18267	-1.54081	-3.30886	0.00107746	0.0188452	-1.01244
ENSG00000132694.18	chr1	ARHGEF11	0.959862	3.25911	3.46691	0.0006215	0.0130232	-1.02041
ENSG00000036530.8	chr14	CYP46A1	-1.38817	-2.65282	-3.28576	0.00116571	0.0197162	-1.02053
ENSG00000116729.14	chr1	WLS	0.986826	0.346962	3.34825	0.00094114	0.017263	-1.02858
ENSG00000175183.10	chr12	CSRP2	-1.73553	-3.17817	-3.27172	0.00122257	0.0203396	-1.04208
ENSG00000237757.2	chrX	EEF1A1P30	1.30213	-3.33954	3.26918	0.00123314	0.0204794	-1.04466
ENSG00000151718.16	chr4	WWC2	1.09633	-0.328568	3.32574	0.00101694	0.0181777	-1.04576
ENSG00000172594.13	chr6	SMPDL3A	0.854068	1.02589	3.35923	0.00090615	0.0168088	-1.05757
ENSG00000225968.7	chr7	ELFN1	-1.47835	-2.9478	-3.26714	0.00124167	0.0205652	-1.06345
ENSG00000167216.16	chr18	KATNAL2	-0.803961	-0.465568	-3.31606	0.00105125	0.0185118	-1.06556
ENSG00000267761.3	chr18	MIR4527HG	2.06425	-4.00273	3.25625	0.00128824	0.0209965	-1.06845
ENSG00000163017.13	chr2	ACTG2	2.53303	-2.24984	3.276	0.00120496	0.0201276	-1.06888
ENSG00000183918.16	chrX	SH2D1A	1.22829	0.295944	3.33348	0.00099027	0.0178754	-1.07028
ENSG00000178445.9	chr9	GLDC	-1.40695	1.29532	-3.36298	0.00089444	0.0166684	-1.07461
ENSG00000198848.12	chr16	CES1	1.19512	1.11956	3.354	0.00092266	0.0170522	-1.08378
ENSG00000158321.16	chr7	AUTS2	-1.06091	2.63921	-3.41408	0.00074866	0.014903	-1.09033
ENSG00000197057.9	chr4	DTHD1	1.26856	-1.96611	3.27383	0.00121387	0.020243	-1.09124
ENSG00000171798.18	chr10	KNDC1	1.35016	-1.38653	3.28619	0.001164	0.0197048	-1.09125
ENSG00000244055.1	chr7	AC007566.1	0.823317	0.536988	3.33301	0.00099186	0.0178882	-1.09256
ENSG00000250900.6	chr5	AC008443.6	0.955674	-2.44054	3.26337	0.00125763	0.0207687	-1.09657
ENSG00000211672.2	chr22	IGLV4-3	-1.54967	-1.97217	-3.27184	0.00122207	0.0203396	-1.09681
ENSG00000185933.6	chr10	CALHM1	1.80074	-2.97777	3.25431	0.00129668	0.0210998	-1.09985
ENSG00000176834.14	chr12	VSIG10	-0.84428	1.57538	-3.36502	0.00088815	0.0165973	-1.10055
ENSG00000021645.18	chr14	NRXN3	-1.44814	-3.32594	-3.24677	0.00133007	0.0213601	-1.11008
ENSG00000120708.17	chr5	TGFBI	0.99867	4.98985	3.51306	0.00052726	0.011685	-1.12127
ENSG00000185189.18	chr8	NRBP2	0.839661	2.81338	3.41003	0.00075936	0.0150121	-1.13105
ENSG00000102970.10	chr16	CCL17	1.85595	-2.46936	3.25035	0.00131409	0.0212119	-1.13349
ENSG00000141441.16	chr18	GAREM1	-1.27208	-2.5853	-3.24687	0.0013296	0.0213601	-1.13815
ENSG00000181982.18	chr4	CCDC149	1.03312	0.524997	3.31774	0.0010452	0.0184522	-1.13887
ENSG00000100079.7	chr22	LGALS2	1.5561	0.875425	3.32804	0.00100893	0.0180987	-1.13991
ENSG00000184357.4	chr6	HIST1H1B	-1.42654	-1.3663	-3.26079	0.00126864	0.0208627	-1.16901
ENSG00000183850.14	chr19	ZNF730	-1.32647	-1.68765	-3.25289	0.00130293	0.0211216	-1.17096
ENSG00000174749.6	chr4	FAM241A	-0.915615	2.46511	-3.37883	0.00084663	0.01609	-1.17673
ENSG00000230099.2	chr7	TRBV5-4	1.4959	-3.41898	3.2182	0.00146388	0.0228426	-1.18958
ENSG00000278756.1	chr9	MIR6722	-1.76894	-3.74975	-3.2146	0.00148158	0.0230474	-1.19148
ENSG00000131398.13	chr19	KCNC3	1.07139	3.12436	3.40523	0.00077221	0.0151232	-1.19807
ENSG00000180530.11	chr21	NRIP1	-0.942179	4.55997	-3.47554	0.00060275	0.0128084	-1.19933
ENSG00000276115.1	chr12	AC026356.2	0.849992	-0.136576	3.27383	0.00121385	0.020243	-1.21916
ENSG00000276903.1	chr6	HIST1H2AL	-1.27036	-2.66776	-3.21601	0.00147462	0.0229924	-1.22432
ENSG00000272954.1	chr22	AP000553.2	1.35663	-2.76029	3.21368	0.00148614	0.0230747	-1.22687
ENSG00000174669.12	chr11	SLC29A2	0.82867	2.31431	3.35601	0.00091626	0.0169808	-1.22693
ENSG00000168528.12	chr1	SERINC2	-1.03044	1.11292	-3.30748	0.00108253	0.0188973	-1.22828
ENSG00000244682.7	chr1	FCGR2C	1.1216	4.64648	3.46697	0.00062136	0.0130232	-1.23814
ENSG00000087589.16	chr20	CASS4	0.882091	0.400877	3.27781	0.00119759	0.0200612	-1.25083
ENSG00000110944.9	chr12	IL23A	-0.90039	0.863942	-3.29167	0.0011425	0.0194553	-1.25146
ENSG00000125900.13	chr20	SIRPD	1.16991	-3.51169	3.19446	0.00158444	0.0238957	-1.25462
ENSG00000172985.10	chr2	SH3RF3	-0.904255	-0.195555	-3.26	0.00127203	0.0208672	-1.25666
ENSG00000211661.2	chr22	IGLV3-22	-1.68203	-4.1256	-3.18841	0.00161664	0.0241108	-1.25872
ENSG00000187037.8	chr7	GPR141	1.03162	-0.673583	3.24732	0.0013276	0.0213601	-1.25928
ENSG00000131477.11	chr17	RAMP2	-1.68362	-2.9755	-3.19848	0.00156342	0.0237162	-1.26159
ENSG00000170893.4	chr3	TRH	-1.4947	-3.32146	-3.19302	0.00159208	0.0239704	-1.26455
ENSG00000183549.10	chr16	ACSM5	-1.53835	-2.18945	-3.20986	0.00150521	0.0232271	-1.26704
ENSG00000105737.9	chr19	GRIK5	-1.05381	-0.56915	-3.24683	0.0013298	0.0213601	-1.26845
ENSG00000145451.13	chr4	GLRA3	1.48698	2.85834	3.36938	0.00087484	0.0164534	-1.2687
ENSG00000178055.11	chr3	PRSS42	1.29867	-3.48031	3.18812	0.00161816	0.0241108	-1.27352
ENSG00000124920.13	chr11	MYRF	1.22262	-2.1422	3.20701	0.00151962	0.0233183	-1.27811
ENSG00000267733.5	chr18	AP005264.5	2.01384	-4.14969	3.17911	0.00166725	0.0246418	-1.28435
ENSG00000002933.9	chr7	TMEM176A	1.50339	2.84093	3.36209	0.00089721	0.0166891	-1.28908
ENSG00000233695.2	chr13	GAS6-AS1	1.11905	4.46769	3.44397	0.00067401	0.0138267	-1.29119
ENSG00000164303.11	chr4	ENPP6	-1.33882	-2.77173	-3.19058	0.001605	0.0240586	-1.29302
ENSG00000115274.15	chr2	INO80B	1.12013	-1.89714	3.2057	0.00152626	0.0233737	-1.29684
ENSG00000246223.8	chr14	LINC01550	1.60321	-2.31658	3.19616	0.00157551	0.0238278	-1.29979
ENSG00000166762.18	chr15	CATSPER2	0.970421	2.08866	3.32167	0.00103124	0.0183357	-1.30317
ENSG00000174944.9	chr3	P2RY14	-1.37677	0.174531	-3.25338	0.00130078	0.0211153	-1.30607
ENSG00000163600.12	chr2	ICOS	1.27661	-0.377487	3.23849	0.00136763	0.0217312	-1.30782
ENSG00000224908.1	chrX	TIMM8BP2	-0.99532	-2.66516	-3.18546	0.00163255	0.0242862	-1.31275
ENSG00000213694.5	chr9	S1PR3	1.05203	0.633423	3.26099	0.00126779	0.0208627	-1.32328
ENSG00000204936.10	chr19	CD177	-1.9526	0.389036	-3.25281	0.00130326	0.0211216	-1.32603
ENSG00000000938.13	chr1	FGR	0.842957	5.97069	3.46672	0.00062191	0.0130232	-1.33206
ENSG00000161911.11	chr6	TREML1	1.43996	-0.152037	3.23469	0.00138517	0.0218857	-1.33644
ENSG00000242498.8	chr15	ARPIN	0.970878	0.759207	3.25932	0.00127493	0.0208809	-1.34037
ENSG00000118276.11	chr18	B4GALT6	-1.27453	0.526767	-3.25205	0.00130658	0.0211274	-1.34062
ENSG00000237786.1	chr6	GFOD1-AS1	1.23954	-3.26276	3.16666	0.00173731	0.0252695	-1.34141
ENSG00000214193.10	chr1	SH3D21	0.953393	1.77463	3.29255	0.00113909	0.0194553	-1.35223
ENSG00000133661.16	chr10	SFTPD	1.2019	-3.61302	3.15847	0.00178488	0.0258122	-1.35335
ENSG00000268758.7	chr19	ADGRE4P	1.92889	-2.03765	3.18289	0.00164651	0.0244429	-1.3546
ENSG00000163293.12	chr4	NIPAL1	-1.04444	-1.58667	-3.19038	0.0016061	0.0240586	-1.36231
ENSG00000008438.5	chr19	PGLYRP1	-1.63875	1.79513	-3.28973	0.00115007	0.0195183	-1.36361
ENSG00000275713.2	chr6	HIST1H2BH	-1.00088	-0.595766	-3.20856	0.00151177	0.0232656	-1.38101
ENSG00000213949.9	chr5	ITGA1	1.06794	-1.05081	3.19391	0.00158735	0.0239171	-1.39053
ENSG00000267750.5	chr17	RUNDC3A-AS1	1.23618	-2.57171	3.15347	0.00181452	0.026091	-1.40908
ENSG00000234925.2	chr12	ATP5PDP4	-0.962641	-2.77911	-3.14855	0.00184414	0.0263664	-1.41285
ENSG00000149201.10	chr11	CCDC81	-0.985629	-0.601939	-3.19643	0.00157409	0.0238243	-1.41657
ENSG00000169169.14	chr19	CPT1C	2.05716	-3.06434	3.14244	0.00188153	0.0267884	-1.41751
ENSG00000116983.13	chr1	HPCAL4	1.46516	-2.59732	3.14993	0.00183577	0.0263027	-1.41786
ENSG00000283633.1	chr22	AP000547.3	1.10965	-1.41418	3.17437	0.00169364	0.0248494	-1.42132
ENSG00000144893.12	chr3	MED12L	-1.06738	-0.655923	-3.1924	0.00159536	0.023987	-1.42448
ENSG00000188064.10	chr22	WNT7B	-1.66471	-2.07924	-3.1518	0.0018245	0.0261785	-1.44187
ENSG00000166503.9	chr15	HDGFL3	-1.12889	1.71082	-3.25701	0.00128493	0.0209784	-1.45382
ENSG00000278637.1	chr6	HIST1H4A	-1.60965	-3.20212	-3.12644	0.00198276	0.0276678	-1.45695
ENSG00000184613.10	chr12	NELL2	1.25975	0.869241	3.22337	0.00143879	0.0225384	-1.46055
ENSG00000142303.14	chr19	ADAMTS10	1.31392	-1.04892	3.16964	0.00172031	0.0250947	-1.46203
ENSG00000256742.1	chr12	AC145422.1	0.964904	-1.2414	3.16399	0.00175269	0.0254276	-1.46423
ENSG00000211799.3	chr14	TRAV19	1.48732	-3.25854	3.12262	0.00200766	0.0279504	-1.46546
ENSG00000109956.13	chr11	B3GAT1	1.54748	-2.1036	3.14101	0.00189034	0.0268466	-1.47133
ENSG00000267206.6	chr9	LCN6	-1.57155	-3.82509	-3.11339	0.002069	0.02847	-1.47298
ENSG00000284690.2	chr17	CD300H	1.17139	-0.589886	3.17654	0.00168151	0.0247796	-1.47633
ENSG00000178726.6	chr20	THBD	1.46749	1.21311	3.22995	0.00140738	0.0221497	-1.4772
ENSG00000267074.1	chr17	AC015911.3	1.42113	-2.47693	3.12411	0.00199793	0.0278342	-1.49769
ENSG00000149527.18	chr1	PLCH2	1.11641	2.63088	3.27908	0.00119244	0.0200182	-1.51642
ENSG00000110799.13	chr12	VWF	1.38041	-0.562991	3.16299	0.00175852	0.0254859	-1.51826
ENSG00000252367.1	chr20	RF00019	-1.45589	-2.71673	-3.11221	0.00207698	0.0285213	-1.51865
ENSG00000221968.9	chr11	FADS3	0.808793	5.97905	3.4088	0.00076262	0.0150471	-1.52195
ENSG00000188766.12	chr19	SPRED3	0.877526	-0.741483	3.15379	0.0018126	0.026082	-1.53163
ENSG00000279196.1	chr16	AC135048.4	1.49645	-3.28304	3.09616	0.00218822	0.0294515	-1.53817
ENSG00000166831.9	chr15	RBPMS2	1.4668	-1.36732	3.13414	0.0019334	0.0271986	-1.5416
ENSG00000081913.14	chr18	PHLPP1	-1.15567	2.79642	-3.27853	0.00119469	0.0200392	-1.54474
ENSG00000197208.6	chr5	SLC22A4	0.918856	-0.118821	3.16508	0.0017464	0.025365	-1.54655
ENSG00000168386.18	chr3	FILIP1L	0.965079	0.927565	3.1955	0.001579	0.0238627	-1.55049
ENSG00000187952.9	chr1	HS6ST1P1	-0.883542	-2.63915	-3.10102	0.00215401	0.0291882	-1.55412
ENSG00000100253.13	chr22	MIOX	1.22989	-0.950237	3.13988	0.00189736	0.0268792	-1.55633
ENSG00000154646.9	chr21	TMPRSS15	-1.61272	-2.18339	-3.10887	0.00209971	0.0287641	-1.55804
ENSG00000100122.7	chr22	CRYBB1	-1.04672	-1.10083	-3.13505	0.00192769	0.0271628	-1.55895
ENSG00000077327.16	chr10	SPAG6	-1.22656	-3.40128	-3.08675	0.00225602	0.0300182	-1.55973
ENSG00000248245.1	chr5	AC010307.2	1.44876	-3.30312	3.08689	0.00225493	0.0300182	-1.56304
ENSG00000212712.2	chr18	AP002414.1	1.63749	-5.18417	3.07382	0.00235225	0.0307329	-1.56507
ENSG00000215861.5	chr1	AC245297.1	-1.18092	-2.19822	-3.10341	0.00213729	0.0290525	-1.57258
ENSG00000130222.11	chr9	GADD45G	-1.15932	-1.2083	-3.12619	0.00198436	0.0276678	-1.57644
ENSG00000235366.2	chr13	LINC01055	-1.7242	-3.9535	-3.07379	0.00235245	0.0307329	-1.57805
ENSG00000225891.1	chr1	AL513365.2	0.980622	-0.719076	3.13742	0.00191273	0.027021	-1.58113
ENSG00000102837.7	chr13	OLFM4	-1.88681	1.37333	-3.20062	0.00155232	0.0236279	-1.58432
ENSG00000232871.8	chr19	SEC1P	-1.16964	-1.09567	-3.12615	0.00198461	0.0276678	-1.58509
ENSG00000267886.1	chr19	AC074135.1	-1.4147	-2.58461	-3.08902	0.00223947	0.0299016	-1.59068
ENSG00000211785.1	chr14	TRAV12-1	1.42537	-3.24761	3.07584	0.00233695	0.0306291	-1.59576
ENSG00000275385.1	chr17	CCL18	-1.57564	-0.378269	-3.14027	0.00189495	0.026864	-1.59905
ENSG00000280122.1	chr17	AC016168.3	-1.58474	-3.43247	-3.06983	0.00238272	0.0309515	-1.60511
ENSG00000111186.13	chr12	WNT5B	-1.15381	1.06078	-3.18146	0.00165431	0.0245045	-1.60666
ENSG00000211777.2	chr14	TRAV3	1.40795	-3.51393	3.0668	0.00240603	0.0310901	-1.61043
ENSG00000111181.12	chr12	SLC6A12	1.04066	-1.71574	3.10064	0.00215663	0.0291882	-1.61246
ENSG00000113319.13	chr5	RASGRF2	1.05921	-0.210107	3.13946	0.00190002	0.026898	-1.61461
ENSG00000215481.9	chr22	BCRP3	1.58856	-2.69498	3.07662	0.00233104	0.0305921	-1.6194
ENSG00000196155.13	chr16	PLEKHG4	0.945609	1.62178	3.19749	0.00156859	0.0237589	-1.62384
ENSG00000205846.3	chr12	CLEC6A	1.30134	-2.28289	3.08006	0.00230534	0.0303735	-1.63322
ENSG00000168268.11	chr3	NT5DC2	-0.835922	4.52893	-3.33949	0.00096999	0.0175881	-1.63656
ENSG00000092621.12	chr1	PHGDH	-1.27767	3.67001	-3.2921	0.00114083	0.0194553	-1.65227
ENSG00000108813.11	chr17	DLX4	1.08004	-2.31017	3.07134	0.0023711	0.0308764	-1.65598
ENSG00000106484.15	chr7	MEST	-0.831147	2.36962	-3.22016	0.00145433	0.0227112	-1.65763
ENSG00000228201.1	chr16	AL022341.1	0.825631	-0.293984	3.12063	0.00202073	0.0280468	-1.66292
ENSG00000279339.1	chr17	AC100788.2	1.12987	0.176726	3.13308	0.00194011	0.0272739	-1.66501
ENSG00000257702.3	chr2	LBX2-AS1	0.86899	-0.191654	3.12009	0.00202429	0.0280606	-1.67261
ENSG00000253537.3	chr5	PCDHGA7	1.40031	-1.07011	3.09595	0.00218973	0.0294515	-1.67399
ENSG00000249840.2	chr19	GAPDHP76	1.27338	-3.26974	3.04502	0.00258037	0.0325291	-1.67942
ENSG00000224566.2	chr1	FAM96AP2	-1.2425	-3.30273	-3.04337	0.00259407	0.0325998	-1.68256
ENSG00000124006.15	chr2	OBSL1	-1.18078	-1.37942	-3.08082	0.00229966	0.0303735	-1.69352
ENSG00000276644.5	chr13	DACH1	-1.05463	-0.248133	-3.11095	0.0020855	0.0286188	-1.69467
ENSG00000279182.1	chr22	CR559946.2	1.28775	-2.56388	3.05088	0.00253237	0.0322265	-1.69807
ENSG00000169116.11	chr4	PARM1	-1.5154	4.25159	-3.30674	0.0010853	0.0189293	-1.70164
ENSG00000277224.2	chr6	HIST1H2BF	-0.99381	-1.09445	-3.08016	0.00230457	0.0303735	-1.71726
ENSG00000130707.17	chr9	ASS1	-1.76558	-0.526122	-3.08926	0.0022377	0.0299016	-1.73545
ENSG00000163554.13	chr1	SPTA1	-1.22769	2.91352	-3.22016	0.00145432	0.0227112	-1.74421
ENSG00000178184.16	chr18	PARD6G	-1.18007	-3.22715	-3.02103	0.00278572	0.0342185	-1.74653
ENSG00000260493.1	chr8	AC011773.4	1.1018	-3.15112	3.01989	0.00279587	0.0342596	-1.75305
ENSG00000102010.15	chrX	BMX	-1.46652	-2.51335	-3.02991	0.00270803	0.0335853	-1.7589
ENSG00000132386.11	chr17	SERPINF1	1.37425	4.42524	3.29394	0.0011337	0.0194131	-1.76684
ENSG00000270225.1	chr5	MTCO2P22	-0.956583	-1.56943	-3.04889	0.00254859	0.0323512	-1.76949
ENSG00000106537.8	chr7	TSPAN13	-1.08659	5.39719	-3.3225	0.00102829	0.0182993	-1.77249
ENSG00000171101.13	chr19	SIGLEC17P	1.14943	-2.32897	3.02875	0.00271811	0.0336186	-1.77326
ENSG00000214797.3	chr11	AP002358.1	0.919281	0.35008	3.09903	0.00216792	0.029291	-1.77959
ENSG00000154065.17	chr18	ANKRD29	-1.95705	-0.142044	-3.08429	0.002274	0.030138	-1.7803
ENSG00000177706.9	chr7	FAM20C	0.988973	0.613315	3.10719	0.00211119	0.028873	-1.78039
ENSG00000225361.3	chr9	PPP1R26-AS1	0.899503	-1.78825	3.03916	0.00262921	0.0328978	-1.78069
ENSG00000272240.1	chr8	AC004908.1	-1.5747	-3.6854	-3.00043	0.00297396	0.0353663	-1.78379
ENSG00000120949.15	chr1	TNFRSF8	0.900983	0.403052	3.09815	0.00217415	0.0293357	-1.78696
ENSG00000148346.12	chr9	LCN2	-1.47552	3.44605	-3.23609	0.00137871	0.0218007	-1.78721
ENSG00000256128.5	chr12	LINC00944	1.54219	-1.22701	3.05041	0.00253615	0.0322543	-1.79137
ENSG00000253214.1	chr8	AC079209.1	-1.17539	-3.45622	-3.00062	0.00297218	0.0353663	-1.79195
ENSG00000254459.1	chr11	AP002812.2	1.12602	-2.5685	3.01646	0.00282656	0.0343903	-1.79266
ENSG00000114204.14	chr3	SERPINI2	-1.42428	-3.4802	-2.99987	0.00297932	0.0353983	-1.79303
ENSG00000284128.1	chr22	AP000356.3	1.43957	-2.38918	3.01959	0.00279856	0.0342717	-1.79477
ENSG00000211694.2	chr7	TRGV10	1.38078	-3.21409	3.00337	0.00294647	0.0352307	-1.79493
ENSG00000175899.14	chr12	A2M	-1.49171	2.27044	-3.16915	0.0017231	0.025099	-1.79736
ENSG00000164050.13	chr3	PLXNB1	-0.953617	2.65242	-3.1884	0.00161666	0.0241108	-1.79807
ENSG00000166963.13	chr15	MAP1A	-0.965387	0.756469	-3.10497	0.00212653	0.0289648	-1.80101
ENSG00000255222.1	chr11	SETP17	1.09186	-3.07287	3.00333	0.00294682	0.0352307	-1.80163
ENSG00000170153.11	chr4	RNF150	-1.49644	-2.99336	-3.00403	0.00294031	0.0352307	-1.80364
ENSG00000101210.12	chr20	EEF1A2	1.3474	-0.543203	3.06491	0.00242073	0.03126	-1.80389
ENSG00000061656.9	chr20	SPAG4	-1.0679	3.28739	-3.22153	0.00144764	0.0226595	-1.80415
ENSG00000206991.1	chr15	RNU6-610P	1.24733	-2.80994	3.00665	0.00291598	0.035112	-1.80599
ENSG00000156510.13	chr10	HKDC1	1.85556	-2.1622	3.02014	0.00279363	0.0342596	-1.80771
ENSG00000254461.1	chr11	AP001107.4	1.31403	-3.09264	2.99977	0.00298017	0.0353983	-1.81029
ENSG00000141505.12	chr17	ASGR1	1.03261	0.552356	3.09085	0.0022262	0.0297788	-1.82209
ENSG00000174500.13	chr3	GCSAM	-1.33569	0.403627	-3.08439	0.00227325	0.030138	-1.8269
ENSG00000262691.1	chr16	AC040160.1	1.42515	-3.67727	2.98217	0.00315051	0.0365804	-1.83273
ENSG00000140287.11	chr15	HDC	1.33828	-2.01277	3.01471	0.00284233	0.034431	-1.83281
ENSG00000117560.8	chr1	FASLG	1.40268	-2.44714	3.00381	0.00294237	0.0352307	-1.83453
ENSG00000111046.4	chr12	MYF6	2.46566	-1.87869	3.01681	0.00282339	0.0343903	-1.83639
ENSG00000211946.3	chr14	IGHV3-20	-1.97176	-1.06753	-3.03844	0.0026353	0.0329536	-1.83765
ENSG00000145850.9	chr5	TIMD4	-1.32304	2.96424	-3.192	0.00159747	0.0239978	-1.8386
ENSG00000196139.14	chr10	AKR1C3	-1.06818	0.269031	-3.07565	0.00233842	0.0306291	-1.84003
ENSG00000224307.1	chr9	AL161785.1	1.11719	-1.59589	3.02296	0.00276865	0.034111	-1.84003
ENSG00000120318.16	chr5	ARAP3	0.960374	1.04667	3.10088	0.00215498	0.0291882	-1.84342
ENSG00000204904.7	chrX	LINC01545	0.893414	-2.81517	2.99194	0.00305493	0.0359676	-1.84565
ENSG00000121053.6	chr17	EPX	-1.99748	1.50348	-3.11786	0.00203911	0.0281741	-1.84663
ENSG00000130037.4	chr12	KCNA5	-1.44899	-2.34041	-3.00118	0.00296695	0.0353663	-1.84835
ENSG00000233392.5	chr2	AC104809.2	1.70409	-1.68601	3.01515	0.00283836	0.0344071	-1.85504
ENSG00000243830.2	chr12	AC092865.1	-0.807875	-2.22594	-2.99904	0.00298713	0.0354183	-1.86159
ENSG00000129682.16	chrX	FGF13	-1.36515	-2.68297	-2.98847	0.00308855	0.0360964	-1.86239
ENSG00000129951.18	chr19	PLPPR3	-1.46558	-1.48767	-3.01714	0.00282048	0.0343903	-1.86451
ENSG00000146054.18	chr5	TRIM7	0.820642	0.366469	3.06979	0.00238301	0.0309515	-1.86567
ENSG00000157214.14	chr7	STEAP2	2.41809	-1.40779	3.0174	0.00281813	0.0343903	-1.86994
ENSG00000283317.1	chr1	AL831711.1	1.45147	-2.97372	2.9789	0.00318313	0.0366986	-1.87248
ENSG00000211689.7	chr7	TRGC1	0.963959	-0.58574	3.03952	0.00262621	0.0328807	-1.87273
ENSG00000138678.11	chr4	GPAT3	0.951701	0.937241	3.08592	0.00226202	0.0300781	-1.87519
ENSG00000124391.4	chr16	IL17C	0.898842	-1.77577	3.00059	0.00297253	0.0353663	-1.88871
ENSG00000115896.16	chr2	PLCL1	1.02937	0.721567	3.07329	0.00235626	0.0307628	-1.88953
ENSG00000152932.8	chr5	RAB3C	1.2573	-2.69107	2.97755	0.00319674	0.0367536	-1.8915
ENSG00000277075.2	chr6	HIST1H2AE	-0.858056	-0.0342968	-3.04837	0.00255283	0.0323682	-1.89217
ENSG00000148143.13	chr9	ZNF462	-1.32916	-3.38355	-2.9587	0.00339155	0.0381291	-1.90689
ENSG00000237476.1	chr22	LINC01637	0.995902	-2.12903	2.98484	0.00312416	0.0363374	-1.90694
ENSG00000080854.14	chr11	IGSF9B	1.43111	-2.99616	2.96535	0.00332166	0.0375504	-1.90771
ENSG00000144824.20	chr3	PHLDB2	-1.11958	0.837451	-3.07021	0.00237977	0.0309494	-1.91026
ENSG00000283312.1	chr2	AC017104.4	1.11467	-2.41983	2.97492	0.00322322	0.0369766	-1.9149
ENSG00000211710.3	chr7	TRBV4-1	1.37644	-3.74114	2.94811	0.00350573	0.0387612	-1.92033
ENSG00000168779.19	chr3	SHOX2	-1.23933	-3.43948	-2.95111	0.00347306	0.0386494	-1.92456
ENSG00000235142.9	chr6	LINC02532	-1.76414	-3.40966	-2.95062	0.00347835	0.0386494	-1.92714
ENSG00000064201.15	chr11	TSPAN32	0.811334	3.32882	3.18111	0.00165622	0.0245148	-1.93472
ENSG00000177324.13	chrX	BEND2	1.48202	-2.47192	2.96484	0.00332691	0.0375677	-1.93894
ENSG00000225885.7	chr8	AC023590.1	-1.27523	-3.48431	-2.94168	0.00357676	0.039312	-1.9475
ENSG00000205038.12	chr8	PKHD1L1	-1.21209	3.78953	-3.20265	0.00154185	0.0235129	-1.94988
ENSG00000256633.1	chr11	AP005019.1	1.01439	-0.166808	3.02345	0.00276434	0.0340992	-1.95195
ENSG00000133216.16	chr1	EPHB2	1.06382	-1.14337	2.995	0.00302555	0.0357267	-1.95315
ENSG00000265287.2	chr17	AC005726.5	1.1979	-2.51768	2.9584	0.00339475	0.0381291	-1.95348
ENSG00000198948.12	chr4	MFAP3L	1.0245	-0.334452	3.01511	0.00283865	0.0344071	-1.96179
ENSG00000204850.4	chr19	AC011484.1	1.56672	-2.75358	2.95004	0.00348472	0.0386541	-1.96192
ENSG00000264324.1	chr2	AC006030.1	0.906385	-2.59234	2.94977	0.00348761	0.0386541	-1.97212
ENSG00000172824.16	chr16	CES4A	1.03192	1.44922	3.07222	0.0023644	0.030809	-1.9735
ENSG00000109452.12	chr4	INPP4B	0.968208	1.28148	3.06412	0.0024269	0.0312995	-1.97691
ENSG00000146122.17	chr6	DAAM2	-1.42888	-1.2911	-2.9808	0.00316419	0.0366528	-1.98067
ENSG00000211787.1	chr14	TRAV8-3	1.42657	-3.06473	2.93518	0.00364992	0.0398956	-1.98452
ENSG00000154240.17	chr17	CEP112	-1.17315	-1.99478	-2.95802	0.00339884	0.0381291	-1.98938
ENSG00000174171.5	chr15	AC020659.1	1.48008	3.52176	3.17171	0.00170859	0.0249948	-1.99724
ENSG00000244151.1	chr7	AC010973.2	1.0864	-1.86478	2.95845	0.00339427	0.0381291	-1.99766
ENSG00000211791.2	chr14	TRAV13-2	1.41419	-3.39787	2.92354	0.00378432	0.0408329	-1.999
ENSG00000021762.20	chr11	OSBPL5	0.855199	1.54348	3.06684	0.00240574	0.0310901	-2.00077
ENSG00000183971.8	chr16	NPW	-1.08164	-1.98075	-2.95319	0.00345058	0.0385321	-2.0035
ENSG00000225217.1	chr1	HSPA7	1.19188	4.17286	3.2055	0.00152726	0.0233737	-2.00433
ENSG00000168497.5	chr2	CAVIN2	1.14648	1.85004	3.07888	0.00231411	0.0304294	-2.00552
ENSG00000254815.5	chr11	AP006284.1	1.57643	-1.75662	2.95599	0.00342042	0.0383031	-2.01241
ENSG00000260792.1	chr14	LINC02280	1.1456	-2.66814	2.93172	0.00368946	0.0401752	-2.01585
ENSG00000159189.12	chr1	C1QC	-1.45477	3.38751	-3.15712	0.00179285	0.0259088	-2.01757
ENSG00000167971.15	chr16	CASKIN1	-0.899186	-3.05064	-2.92168	0.00380627	0.041005	-2.02096
ENSG00000136826.15	chr9	KLF4	0.805672	4.37178	3.20952	0.00150696	0.0232271	-2.02163
ENSG00000219438.8	chr22	FAM19A5	-1.97585	-0.123353	-2.99837	0.00299342	0.035472	-2.02623
ENSG00000197496.6	chr20	SLC2A10	-1.28311	-2.95722	-2.92019	0.00382389	0.0411057	-2.0299
ENSG00000116748.21	chr1	AMPD1	-1.61346	0.195363	-3.00499	0.00293139	0.0351933	-2.03501
ENSG00000196557.13	chr16	CACNA1H	1.23015	-2.95836	2.91813	0.00384832	0.0411707	-2.03527
ENSG00000258645.2	chr14	HSPE1P2	-0.91638	-2.97766	-2.91634	0.00386975	0.0413341	-2.03895
ENSG00000223914.2	chr12	LINC02471	1.58292	-2.65934	2.91856	0.00384331	0.0411707	-2.05139
ENSG00000156886.11	chr16	ITGAD	-1.42641	0.281489	-3.00085	0.00297004	0.0353663	-2.05439
ENSG00000109943.9	chr11	CRTAM	0.967065	-0.426334	2.97865	0.00318562	0.0366986	-2.05643
ENSG00000173482.16	chr18	PTPRM	0.976656	-0.0149153	2.98911	0.00308236	0.0360803	-2.06136
ENSG00000260005.6	chr17	AC027601.1	1.30341	0.181076	2.99325	0.0030423	0.0358823	-2.06677
ENSG00000261996.1	chr17	AC004706.1	1.08286	0.47895	3.00261	0.00295356	0.0352694	-2.06778
ENSG00000233387.1	chr10	IATPR	1.4749	-3.00595	2.90446	0.00401457	0.0423643	-2.06869
ENSG00000111907.21	chr6	TPD52L1	-1.38462	-2.97689	-2.90469	0.0040117	0.0423643	-2.06967
ENSG00000272808.4	chr15	AC015712.6	1.43198	-4.16335	2.88393	0.00427642	0.0438638	-2.07181
ENSG00000124145.6	chr20	SDC4	1.13766	-0.354865	2.97301	0.00324265	0.0370522	-2.07796
ENSG00000101003.10	chr20	GINS1	-0.91172	1.88985	-3.05553	0.00249485	0.0319103	-2.07883
ENSG00000268655.2	chr19	AC008687.4	1.30176	-3.16281	2.89676	0.00411099	0.0429913	-2.08054
ENSG00000171621.14	chr1	SPSB1	-0.91548	0.686353	-3.00374	0.00294299	0.0352307	-2.08493
ENSG00000164124.10	chr4	TMEM144	1.19133	-0.519466	2.96374	0.00333839	0.037655	-2.09023
ENSG00000197046.11	chr18	SIGLEC15	1.07533	-1.48497	2.93471	0.0036553	0.0399112	-2.09139
ENSG00000283602.1	chr5	AC116353.5	1.23788	-3.28435	2.89024	0.00419438	0.043398	-2.09141
ENSG00000117154.12	chr1	IGSF21	-1.65206	-2.97522	-2.89561	0.00412563	0.0430403	-2.0936
ENSG00000169255.15	chr3	B3GALNT1	-0.988647	0.0458009	-2.97439	0.00322868	0.0369766	-2.10774
ENSG00000286205.1	chr4	AC139887.5	1.18397	-3.19726	2.8848	0.00426507	0.0438143	-2.10996
ENSG00000167210.17	chr18	LOXHD1	1.27913	-2.2882	2.90476	0.00401082	0.0423643	-2.11197
ENSG00000179869.15	chr7	ABCA13	-1.55153	-0.0267546	-2.96927	0.00328095	0.0372785	-2.11575
ENSG00000188060.7	chr1	RAB42	-0.984521	0.268478	-2.97822	0.00318995	0.0367209	-2.11676
ENSG00000211788.2	chr14	TRAV13-1	1.34718	-2.73182	2.89138	0.00417969	0.0433353	-2.1188
ENSG00000237484.5	chr21	LINC01684	-1.32998	-0.232464	-2.96124	0.00336468	0.0379091	-2.12074
ENSG00000128602.10	chr7	SMO	-0.861443	0.473501	-2.98353	0.00313703	0.036466	-2.12097
ENSG00000140545.15	chr15	MFGE8	-0.86054	1.69456	-3.03006	0.00270677	0.0335853	-2.1263
ENSG00000134028.14	chr8	ADAMDEC1	1.27113	-0.705267	2.94385	0.00355273	0.039152	-2.12994
ENSG00000156298.12	chrX	TSPAN7	-1.29686	-2.05375	-2.904	0.00402022	0.0423712	-2.13052
ENSG00000154133.14	chr11	ROBO4	-1.34231	-2.62883	-2.88916	0.0042083	0.0435071	-2.13096
ENSG00000138028.16	chr2	CGREF1	-1.25166	-3.35887	-2.87049	0.00445627	0.0446625	-2.13891
ENSG00000211599.2	chr2	IGKV5-2	-1.3242	-0.22652	-2.95422	0.00343949	0.0384773	-2.14069
ENSG00000265407.1	chr19	MIR4324	1.03105	-2.79205	2.87996	0.00432881	0.0441031	-2.14511
ENSG00000255733.5	chr12	IFNG-AS1	-1.51617	1.55648	-3.01645	0.00282665	0.0343903	-2.14756
ENSG00000262482.1	chr16	AC004034.1	-1.452	-3.67777	-2.85869	0.00461978	0.0455148	-2.15449
ENSG00000269894.1	chr3	AC018809.1	1.04909	-2.31326	2.88772	0.00422694	0.0435781	-2.15543
ENSG00000143452.16	chr1	HORMAD1	0.95452	-0.929243	2.92649	0.00374984	0.0406688	-2.15903
ENSG00000132514.13	chr17	CLEC10A	0.959757	0.108401	2.95758	0.00340347	0.038154	-2.15999
ENSG00000211795.3	chr14	TRAV8-6	1.33959	-3.50731	2.85826	0.00462585	0.0455148	-2.16326
ENSG00000153162.9	chr6	BMP6	-1.08612	2.57212	-3.05913	0.00246619	0.0316644	-2.16939
ENSG00000184669.9	chr11	OR7E14P	-1.29372	-3.33012	-2.85854	0.00462183	0.0455148	-2.17112
ENSG00000147606.9	chr8	SLC26A7	1.21144	-2.3418	2.88086	0.00431694	0.0440509	-2.17159
ENSG00000227191.8	chr7	TRGC2	1.23691	-0.640073	2.93014	0.00370758	0.0403507	-2.17284
ENSG00000241490.1	chr3	AC093010.2	0.820763	0.50631	2.96566	0.00331838	0.0375344	-2.17418
ENSG00000072840.13	chr4	EVC	-1.78919	1.10542	-2.98773	0.0030958	0.0361117	-2.17506
ENSG00000272632.1	chr4	AC097504.2	1.2018	-4.01192	2.84412	0.00482907	0.046576	-2.178
ENSG00000213057.5	chr1	C1orf220	0.806965	1.66196	3.00915	0.00289296	0.0348765	-2.18194
ENSG00000263080.1	chr16	AC009121.2	0.902023	-2.51319	2.87254	0.0044283	0.0444928	-2.18199
ENSG00000154736.6	chr21	ADAMTS5	1.29765	-2.42164	2.87298	0.00442234	0.0444773	-2.1869
ENSG00000171596.7	chr2	NMUR1	1.07142	-2.03156	2.88318	0.00428634	0.0438984	-2.18752
ENSG00000271133.5	chr7	AC004130.1	-1.22566	0.0845473	-2.94587	0.00353033	0.0389785	-2.19034
ENSG00000135919.13	chr2	SERPINE2	-1.00823	-0.758968	-2.9192	0.00383565	0.0411619	-2.19292
ENSG00000211829.9	chr14	TRDC	1.1275	-0.581595	2.92455	0.0037725	0.040771	-2.19293
ENSG00000137877.10	chr15	SPTBN5	1.18818	-0.0737443	2.93947	0.00360157	0.0394711	-2.19433
ENSG00000166833.21	chr11	NAV2	-1.5036	-0.261522	-2.93235	0.00368219	0.0401177	-2.19805
ENSG00000273059.1	chr1	AC239803.2	1.13236	-3.48374	2.84407	0.00482985	0.046576	-2.20066
ENSG00000198885.9	chr2	ITPRIPL1	-0.80532	1.38668	-2.98883	0.00308506	0.0360909	-2.20504
ENSG00000157306.14	chr14	ZFHX2-AS1	0.870855	0.208172	2.94402	0.00355079	0.039152	-2.20649
ENSG00000234964.4	chr11	FABP5P7	-1.01804	-2.70767	-2.85798	0.00462974	0.0455148	-2.2076
ENSG00000229931.1	chr6	AL137003.1	1.27774	-2.13092	2.87258	0.00442781	0.0444928	-2.20827
ENSG00000179528.16	chr2	LBX2	1.09457	-2.19578	2.86802	0.00448999	0.0448443	-2.21561
ENSG00000108556.9	chr17	CHRNE	0.873949	1.54879	2.98603	0.00311245	0.036243	-2.23313
ENSG00000145936.9	chr5	KCNMB1	0.845841	-0.872038	2.90075	0.00406078	0.0426065	-2.23365
ENSG00000255142.1	chr11	AP006621.2	1.39284	-2.39555	2.85265	0.00470554	0.0458696	-2.24191
ENSG00000133317.14	chr11	LGALS12	0.927735	-0.607164	2.90528	0.00400437	0.0423643	-2.24331
ENSG00000269984.1	chr3	AC078795.1	1.06732	-1.80076	2.86681	0.0045066	0.0449514	-2.2484
ENSG00000222724.1	chr2	RNU2-63P	-1.23434	-2.76811	-2.84077	0.00487852	0.0468212	-2.24846
ENSG00000122386.10	chr16	ZNF205	1.00638	-2.32778	2.85057	0.00473534	0.0459727	-2.25201
ENSG00000092051.17	chr14	JPH4	1.09975	-2.95393	2.83334	0.00498957	0.0473579	-2.25639
ENSG00000214578.5	chr17	HMGN2P15	-0.900625	-2.9569	-2.83307	0.00499362	0.0473579	-2.25691
ENSG00000177614.11	chr1	PGBD5	-1.28223	-2.87992	-2.8323	0.0050053	0.0474056	-2.26346
ENSG00000274341.1	chr17	AC005899.6	0.984243	-1.7937	2.85605	0.00465708	0.0455808	-2.27738
ENSG00000260293.2	chr16	AC106820.4	-1.08031	-1.94194	-2.8502	0.00474075	0.0459809	-2.28126
ENSG00000251432.6	chr4	LINC02615	0.914979	-0.471515	2.89416	0.00414408	0.04316	-2.28474
ENSG00000213658.11	chr16	LAT	1.27541	-2.0251	2.84635	0.00479653	0.0464103	-2.28504
ENSG00000088726.16	chr3	TMEM40	1.31029	-1.92874	2.84688	0.00478888	0.0463585	-2.291
ENSG00000218809.1	chr6	AL391903.1	1.28819	-3.30284	2.81101	0.00533749	0.0494362	-2.29387
ENSG00000134569.10	chr11	LRP4	-1.24391	-3.24675	-2.81009	0.00535227	0.0494942	-2.2992
ENSG00000102048.15	chrX	ASB9	-1.13975	-2.72554	-2.82194	0.00516464	0.0483181	-2.29966
ENSG00000181392.16	chr19	SYNE4	1.12807	-1.46503	2.85756	0.0046356	0.0455148	-2.2999
ENSG00000240038.6	chr1	AMY2B	0.891926	3.17516	3.04811	0.00255493	0.0323682	-2.30316
ENSG00000243708.10	chr15	PLA2G4B	1.21373	-1.48966	2.85528	0.00466792	0.0456482	-2.30391
ENSG00000249992.1	chr3	TMEM158	1.25447	-1.403	2.85455	0.00467835	0.045728	-2.31301
ENSG00000211647.1	chr22	IGLV5-48	-1.5191	-3.1067	-2.80654	0.00540979	0.0498538	-2.31602
ENSG00000251922.1	chr10	RF00397	0.866499	-0.689909	2.86903	0.00447612	0.0447647	-2.33424
ENSG00000133169.6	chrX	BEX1	-1.36527	-1.79922	-2.83295	0.00499556	0.0473579	-2.33761
ENSG00000162913.9	chr1	OBSCN-AS1	0.881549	-0.233391	2.88162	0.00430687	0.0440509	-2.33868
ENSG00000247373.3	chr12	AC055713.1	0.851246	0.682795	2.91037	0.00394192	0.0419493	-2.34495
ENSG00000167992.13	chr11	VWCE	-1.0959	-0.89856	-2.8579	0.0046309	0.0455148	-2.3465
ENSG00000272144.1	chr5	AC025171.4	0.921698	-0.219857	2.87851	0.00434813	0.0441943	-2.34823
ENSG00000260261.2	chr3	AC124944.3	0.946478	0.969173	2.91906	0.00383728	0.0411619	-2.35157
ENSG00000099840.13	chr19	IZUMO4	0.869824	2.76423	3.00551	0.00292655	0.0351933	-2.35584
ENSG00000164483.17	chr6	SAMD3	1.02438	-0.221914	2.87486	0.00439701	0.0443777	-2.3579
ENSG00000207110.1	chr8	RNU1-106P	0.865042	-2.01036	2.81724	0.00523826	0.0487977	-2.36204
ENSG00000050555.18	chr9	LAMC3	1.65368	2.10885	2.96688	0.00330574	0.0374683	-2.36341
ENSG00000272010.1	chr8	AC100814.1	1.03064	-1.57002	2.82987	0.00504228	0.0476003	-2.36422
ENSG00000266733.7	chr17	TBC1D29P	1.1601	-0.0402296	2.8775	0.00436162	0.0442181	-2.36643
ENSG00000162004.17	chr16	CCDC78	1.08166	1.79698	2.94953	0.00349028	0.0386541	-2.3685
ENSG00000076356.7	chr1	PLXNA2	-0.8566	0.79937	-2.90572	0.00399899	0.0423552	-2.3699
ENSG00000148848.14	chr10	ADAM12	0.960635	-1.8987	2.81754	0.00523365	0.0487884	-2.36995
ENSG00000145649.8	chr5	GZMA	1.03344	1.36472	2.92605	0.00375498	0.0406688	-2.37833
ENSG00000258227.7	chr7	CLEC5A	1.0145	0.153948	2.87884	0.00434375	0.044172	-2.38007
ENSG00000233912.1	chr3	AC026202.2	-0.9389	-1.05929	-2.83935	0.00489955	0.0468814	-2.38217
ENSG00000157551.19	chr21	KCNJ15	1.05628	-1.00967	2.83798	0.00491998	0.046973	-2.39001
ENSG00000205517.12	chr19	RGL3	-1.61063	-1.12814	-2.83349	0.00498734	0.0473579	-2.39181
ENSG00000175591.11	chr11	P2RY2	0.840547	-0.256107	2.85972	0.00460524	0.0454748	-2.39573
ENSG00000141052.17	chr17	MYOCD	1.89465	0.643096	2.8885	0.00421688	0.0435636	-2.40078
ENSG00000270127.2	chr15	AC027020.2	0.889495	1.07033	2.90321	0.00403002	0.0423942	-2.4066
ENSG00000100346.17	chr22	CACNA1I	1.32905	-1.21082	2.82309	0.00514672	0.0482236	-2.41217
ENSG00000133067.17	chr1	LGR6	0.967404	-0.440589	2.83799	0.00491983	0.046973	-2.43813
ENSG00000163736.4	chr4	PPBP	1.26268	2.81609	2.97944	0.00317779	0.0366858	-2.43906
ENSG00000172673.10	chr6	THEMIS	1.27944	-1.35674	2.80562	0.00542474	0.049923	-2.44548
ENSG00000260910.1	chr13	LINC00565	0.971947	-1.15134	2.81145	0.00533052	0.0493944	-2.44778
ENSG00000164047.5	chr3	CAMP	-1.34825	2.89143	-2.97953	0.00317689	0.0366858	-2.45158
ENSG00000134247.10	chr1	PTGFRN	0.98215	-1.19913	2.80572	0.00542318	0.049923	-2.45867
ENSG00000099194.6	chr10	SCD	-0.803477	3.41574	-3.00361	0.00294423	0.0352307	-2.4747
ENSG00000196218.12	chr19	RYR1	0.969453	0.21651	2.83958	0.00489613	0.0468786	-2.49151
ENSG00000235897.1	chr3	TM4SF19-AS1	0.915509	-0.853245	2.8044	0.00544465	0.049992	-2.49177
ENSG00000256448.5	chr11	AP000763.3	0.865705	-0.0518491	2.8298	0.00504342	0.0476003	-2.4934
ENSG00000153904.20	chr1	DDAH1	-1.54483	0.815517	-2.86012	0.00459962	0.0454748	-2.49593
ENSG00000163126.15	chr2	ANKRD23	0.80604	0.0926005	2.8251	0.00511554	0.0481105	-2.5188
ENSG00000136449.14	chr17	MYCBPAP	0.982065	-0.368205	2.80481	0.00543797	0.0499615	-2.53211
ENSG00000223745.7	chr1	CCDC18-AS1	0.844774	4.83578	3.05642	0.00248774	0.0318559	-2.53883
ENSG00000215788.10	chr1	TNFRSF25	1.13211	0.98653	2.8453	0.00481193	0.0465316	-2.55481
ENSG00000100450.13	chr14	GZMH	1.10795	0.813805	2.83687	0.00493651	0.0470639	-2.55842
ENSG00000140807.7	chr16	NKD1	0.983041	0.350255	2.81717	0.00523949	0.0487977	-2.56392
ENSG00000239839.7	chr8	DEFA3	-2.24616	3.25833	-2.96015	0.00337622	0.0380178	-2.57079
ENSG00000019169.10	chr2	MARCO	0.99771	1.34358	2.85146	0.00472252	0.0459346	-2.58025
ENSG00000170921.15	chr17	TANC2	0.839734	1.58927	2.86292	0.00456044	0.0454128	-2.58027
ENSG00000130508.11	chr2	PXDN	-1.58191	2.63392	-2.91828	0.00384664	0.0411707	-2.58116
ENSG00000099994.11	chr22	SUSD2	1.0607	0.50263	2.81393	0.00529082	0.0491622	-2.58744
ENSG00000147180.16	chrX	ZNF711	-1.15328	3.77383	-2.98548	0.00311786	0.0362849	-2.59035
ENSG00000158715.6	chr1	SLC45A3	-0.840669	1.01306	-2.83268	0.00499958	0.0473737	-2.59176
ENSG00000093134.14	chr6	VNN3	0.843225	0.351849	2.80583	0.00542132	0.049923	-2.59415
ENSG00000198821.10	chr1	CD247	0.810245	2.31706	2.89374	0.00414935	0.0431759	-2.5989
ENSG00000124203.6	chr20	ZNF831	0.918118	3.08649	2.93662	0.00363364	0.0397392	-2.60685
ENSG00000067445.20	chrX	TRO	0.974422	1.40747	2.84007	0.00488883	0.0468527	-2.619
ENSG00000100453.13	chr14	GZMB	0.855322	1.0356	2.82315	0.00514568	0.0482236	-2.61988
ENSG00000135069.14	chr9	PSAT1	-0.833471	3.35625	-2.94832	0.00350345	0.0387592	-2.62176
ENSG00000203747.11	chr1	FCGR3A	0.822512	4.53744	3.01426	0.00284633	0.0344557	-2.62668
ENSG00000164056.11	chr4	SPRY1	-0.85668	0.83944	-2.80476	0.00543885	0.0499615	-2.647
ENSG00000113140.11	chr5	SPARC	0.990383	2.7347	2.88566	0.00425371	0.0437646	-2.68843
ENSG00000256235.2	chr5	SMIM3	-0.954502	2.66039	-2.87779	0.00435769	0.0442023	-2.69776
ENSG00000180535.3	chr7	BHLHA15	-0.99897	2.24609	-2.85152	0.00472166	0.0459346	-2.7039
ENSG00000235703.5	chrX	LINC00894	1.11	1.39586	2.80681	0.0054053	0.0498384	-2.70683
ENSG00000263961.8	chr1	RHEX	0.862502	1.95777	2.81919	0.00520758	0.0485904	-2.74896
ENSG00000258727.1	chr14	AL135999.1	0.932742	3.56927	2.90498	0.00400813	0.0423643	-2.78175
ENSG00000187231.14	chr2	SESTD1	-0.871505	4.85515	-2.95797	0.00339935	0.0381291	-2.82562
ENSG00000100385.14	chr22	IL2RB	0.881309	3.21053	2.86218	0.00457082	0.0454264	-2.83584
ENSG00000050405.13	chr12	LIMA1	1.0236	2.39024	2.80771	0.00539081	0.0497927	-2.84481
ENSG00000133574.10	chr7	GIMAP4	1.00007	3.30115	2.85988	0.00460302	0.0454748	-2.85842
ENSG00000120594.17	chr10	PLXDC2	0.940442	3.57839	2.87566	0.00438627	0.0443582	-2.86483
ENSG00000101162.3	chr20	TUBB1	1.04056	3.04445	2.83906	0.00490391	0.0468862	-2.86964
ENSG00000131042.14	chr19	LILRB2	0.809424	4.03775	2.86966	0.0044675	0.0447305	-2.96144
ENSG00000103257.9	chr16	SLC7A5	-0.91407	6.77063	-2.92608	0.00375471	0.0406688	-3.00295
ENSG00000012223.12	chr3	LTF	-1.36033	6.27875	-2.92022	0.00382352	0.0411057	-3.01242
ENSG00000132465.11	chr4	JCHAIN	-1.17809	11.8503	-2.88423	0.00427248	0.0438457	-3.06883
ENSG00000118432.12	chr6	CNR1	0.833598	4.80685	2.84337	0.00484008	0.046611	-3.14098

## Sheet: BCE_vs_ BCL
	Chr	Gene Symbol	logFC	AveExpr	t	P.Value	adj.P.Val	B
ENSG00000116649.10	chr1	SRM	1.02728	5.81682	7.56459	7.806548066144e-13	1.57262910792471e-08	18.6775
ENSG00000033170.16	chr14	FUT8	1.02926	5.54782	7.15686	9.52411525014453e-12	7.59870851302963e-08	16.277
ENSG00000128595.17	chr7	CALU	0.921444	6.07753	7.12825	1.13160216128513e-11	7.59870851302963e-08	16.1167
ENSG00000141068.14	chr17	KSR1	-1.15137	4.75104	-7.00149	2.41574697220854e-11	1.08386846041094e-07	15.367
ENSG00000058262.10	chr3	SEC61A1	0.901631	8.03712	6.96709	2.96335050793557e-11	1.08386846041094e-07	15.196
ENSG00000163393.13	chr1	SLC22A15	-1.47136	4.03535	-6.92659	3.76623441195164e-11	1.08386846041094e-07	14.8908
ENSG00000211896.7	chr14	IGHG1	2.85739	8.95172	6.65751	1.81025763928115e-10	3.31524001302898e-07	13.4628
ENSG00000167476.10	chr19	JSRP1	1.80205	2.69977	6.68006	1.5896122550823e-10	3.31524001302898e-07	13.2851
ENSG00000144867.11	chr3	SRPRB	1.11409	5.28822	6.61831	2.26784765036684e-10	3.47084331125808e-07	13.245
ENSG00000184840.11	chr5	TMED9	0.893463	6.63141	6.57657	2.88014852899475e-10	3.47084331125808e-07	13.0185
ENSG00000114850.6	chr3	SSR3	1.08357	7.09139	6.57627	2.88499180288208e-10	3.47084331125808e-07	13.0168
ENSG00000188994.13	chr6	ZNF292	-0.877333	6.35686	-6.57362	2.9289816972642e-10	3.47084331125808e-07	13.0025
ENSG00000095380.11	chr9	NANS	1.10998	4.28746	6.55754	3.210666571872e-10	3.59327100502008e-07	12.8875
ENSG00000120697.9	chr13	ALG5	0.948517	4.72253	6.54439	3.46043314211957e-10	3.6689697709473e-07	12.8342
ENSG00000068912.14	chr2	ERLEC1	1.0166	6.47931	6.46008	5.58185374665421e-10	4.86644542844075e-07	12.3859
ENSG00000139946.10	chr14	PELI2	-1.32254	4.21092	-6.46463	5.440266600423e-10	4.86644542844075e-07	12.3846
ENSG00000068024.16	chr2	HDAC4	-1.15035	4.57657	-6.45529	5.73483956930476e-10	4.86644542844075e-07	12.3507
ENSG00000166794.4	chr15	PPIB	0.998472	8.05232	6.43654	6.37420631808892e-10	5.13633545111605e-07	12.2587
ENSG00000105281.12	chr19	SLC1A5	1.1376	6.01564	6.40238	7.72413803918338e-10	5.98472156920574e-07	12.0762
ENSG00000118705.17	chr20	RPN2	0.86698	8.10621	6.36904	9.31071928701228e-10	6.94683111247639e-07	11.8966
ENSG00000185624.15	chr17	P4HB	0.89022	8.68587	6.28734	1.46748095997403e-09	9.23825123083652e-07	11.4625
ENSG00000285730.1	chr6	Z94721.3	-2.0932	-1.05085	-6.58009	2.82268532979243e-10	3.47084331125808e-07	11.2234
ENSG00000168701.19	chr16	TMEM208	0.864628	4.18744	6.13737	3.34762041162585e-09	1.8732725886723e-06	10.669
ENSG00000211893.4	chr14	IGHG2	2.14716	8.04951	6.1174	3.73245648939344e-09	1.97491589012213e-06	10.5708
ENSG00000197903.7	chr6	HIST1H2BK	1.2733	5.69288	6.10124	4.07528967337751e-09	2.00963328528576e-06	10.4911
ENSG00000017483.15	chrX	SLC38A5	1.26198	4.52257	6.0821	4.52132181233862e-09	2.07004608885367e-06	10.3939
ENSG00000121073.14	chr17	SLC35B1	0.841745	5.0736	6.02766	6.06748320083086e-09	2.60062657618591e-06	10.1163
ENSG00000172339.10	chr1	ALG14	0.959637	2.72469	6.02796	6.05770846347928e-09	2.60062657618591e-06	9.95329
ENSG00000091490.11	chr4	SEL1L3	1.16093	8.68681	5.99223	7.34039409545005e-09	2.95744478105683e-06	9.9267
ENSG00000211658.2	chr22	IGLV3-27	3.27589	0.431165	6.09611	4.19039362417383e-09	2.00963328528576e-06	9.63716
ENSG00000255587.9	chr6	RAB44	-2.34915	0.369616	-6.09954	4.11293438015649e-09	2.00963328528576e-06	9.63161
ENSG00000137720.8	chr11	C11orf1	0.910008	2.97427	5.91168	1.12848145530566e-08	4.13331980311501e-06	9.42377
ENSG00000266750.1	chr6	MIR4645	-2.46143	0.97581	-5.94981	9.21072063360937e-09	3.56826859930886e-06	9.13445
ENSG00000101294.17	chr20	HM13	0.903997	6.6989	5.81576	1.87333888097556e-08	5.80590950111581e-06	9.03342
ENSG00000187837.3	chr6	HIST1H1C	1.76574	5.25514	5.7778	2.28560182292397e-08	6.57763553182907e-06	8.85583
ENSG00000168081.9	chr8	PNOC	1.02079	5.55369	5.72571	2.99869805196043e-08	7.9485226653609e-06	8.59429
ENSG00000171208.9	chr16	NETO2	0.991568	3.58543	5.72053	3.08034809870664e-08	8.05891070759029e-06	8.55806
ENSG00000267041.6	chr19	ZNF850	-0.942803	1.6251	-5.77053	2.37412941578827e-08	6.73617423676828e-06	8.4804
ENSG00000173212.4	chr1	MAB21L3	-3.38839	0.813028	-5.81222	1.90846724449449e-08	5.82516252126388e-06	8.45261
ENSG00000082293.13	chr6	COL19A1	-1.46952	4.16121	-5.6733	3.93364534074456e-08	9.32273945756462e-06	8.35005
ENSG00000179222.17	chrX	MAGED1	0.886026	6.27132	5.6638	4.13126794935594e-08	9.56602216549143e-06	8.28307
ENSG00000076554.15	chr8	TPD52	0.819024	6.54734	5.648	4.48136791228077e-08	1.01435007407748e-05	8.20423
ENSG00000204386.10	chr6	NEU1	0.932251	4.57101	5.6258	5.02290724735444e-08	1.0407867732525e-05	8.11969
ENSG00000155111.15	chr6	CDK19	-0.87603	5.40415	-5.62016	5.17022090889288e-08	1.05206161827926e-05	8.07953
ENSG00000073803.14	chr3	MAP3K13	0.894474	3.74404	5.60288	5.64870371766165e-08	1.11561898423817e-05	8.00109
ENSG00000230438.6	chr6	SERPINB9P1	-1.93959	4.67293	-5.58695	6.12770295657869e-08	1.18694784673344e-05	7.93088
ENSG00000225205.5	chr2	AC078883.1	1.18782	1.95584	5.62424	5.0631473705011e-08	1.0407867732525e-05	7.87878
ENSG00000106803.10	chr9	SEC61B	0.956654	6.09813	5.55704	7.13664650493323e-08	1.34362377422318e-05	7.76515
ENSG00000134285.11	chr12	FKBP11	1.47107	5.4715	5.5421	7.69946418984006e-08	1.4229881293975e-05	7.701
ENSG00000159788.19	chr4	RGS12	-1.51309	2.71569	-5.53798	7.86186664253889e-08	1.43073485797523e-05	7.60827
ENSG00000113621.14	chr5	TXNDC15	0.992112	5.17977	5.50567	9.25882468048121e-08	1.63613178235346e-05	7.53157
ENSG00000163902.12	chr3	RPN1	0.861084	7.63653	5.50761	9.16879133003774e-08	1.63456018888151e-05	7.52258
ENSG00000246596.7	chr5	AC139795.1	-1.50054	2.57982	-5.49112	9.96464261982014e-08	1.70116716590065e-05	7.37409
ENSG00000105339.10	chr8	DENND3	-1.08084	6.13164	-5.47273	1.09311662809024e-07	1.83506953940649e-05	7.36022
ENSG00000211685.3	chr22	IGLC7	3.0824	0.176498	5.59962	5.7437472566288e-08	1.12337658723094e-05	7.32329
ENSG00000087502.18	chr12	ERGIC2	0.856839	4.97129	5.45935	1.16912559782285e-07	1.9464491874497e-05	7.31535
ENSG00000120725.13	chr5	SIL1	1.00247	4.71765	5.44647	1.24720065351981e-07	2.04267131424037e-05	7.25977
ENSG00000126217.21	chr13	MCF2L	-1.80521	3.90764	-5.41856	1.43406726959063e-07	2.22225270353102e-05	7.13568
ENSG00000198855.7	chr12	FICD	1.06125	3.40001	5.40933	1.50165285131971e-07	2.29057504809726e-05	7.07657
ENSG00000167775.11	chr19	CD320	0.829314	4.38191	5.37741	1.76019058830752e-07	2.51482548946489e-05	6.94193
ENSG00000166562.9	chr18	SEC11C	1.24976	6.61582	5.36974	1.82847026731035e-07	2.54031265758393e-05	6.8689
ENSG00000163435.16	chr1	ELF3	-2.15724	0.0805811	-5.49932	9.56062034976812e-08	1.66033359436275e-05	6.86452
ENSG00000150967.18	chr12	ABCB9	1.48232	2.77867	5.36989	1.82712418677704e-07	2.54031265758393e-05	6.84604
ENSG00000184489.11	chr8	PTP4A3	1.86948	2.15899	5.37866	1.74930172463949e-07	2.51482548946489e-05	6.80296
ENSG00000197124.12	chr19	ZNF682	-0.99853	1.9976	-5.37466	1.78436743196013e-07	2.53141421949555e-05	6.75884
ENSG00000073737.16	chr2	DHRS9	2.7169	0.893276	5.42377	1.39725234206066e-07	2.19903503365719e-05	6.74789
ENSG00000145050.16	chr3	MANF	1.16485	5.66812	5.33155	2.20881148889597e-07	2.98634278146371e-05	6.69965
ENSG00000074842.7	chr19	MYDGF	1.02157	6.08081	5.32354	2.29777453851458e-07	3.06547470717723e-05	6.65655
ENSG00000170190.16	chr17	SLC16A5	-1.03286	3.65953	-5.31464	2.40079644968038e-07	3.16104865874583e-05	6.6514
ENSG00000105855.10	chr7	ITGB8	-3.11725	0.0667699	-5.44346	1.2661585349503e-07	2.05699707149788e-05	6.62326
ENSG00000134910.13	chr11	STT3A	1.02519	6.3672	5.30816	2.47853711284504e-07	3.24221624274438e-05	6.58214
ENSG00000258572.1	chr14	AL133467.1	1.39511	2.97328	5.30028	2.57646134807196e-07	3.30591171063119e-05	6.55018
ENSG00000132432.14	chr7	SEC61G	0.828384	4.78135	5.27234	2.95483039650921e-07	3.60796441152541e-05	6.4455
ENSG00000136240.10	chr7	KDELR2	0.836978	5.88009	5.27232	2.95514583222483e-07	3.60796441152541e-05	6.42088
ENSG00000070540.13	chr17	WIPI1	1.01167	3.78976	5.26107	3.12214852231656e-07	3.69974599894513e-05	6.4092
ENSG00000112297.15	chr6	CRYBG1	-0.817514	7.11421	-5.26341	3.08667907052108e-07	3.69974599894513e-05	6.37115
ENSG00000183010.16	chr17	PYCR1	1.54081	3.51339	5.22923	3.64664823648329e-07	4.19781306994034e-05	6.25994
ENSG00000261366.1	chr6	MANEA-DT	-1.48358	-0.358423	-5.37152	1.81240581751797e-07	2.54031265758393e-05	6.20385
ENSG00000140836.17	chr16	ZFHX3	-1.41437	3.59359	-5.21083	3.9875583800302e-07	4.51288559357913e-05	6.17909
ENSG00000074695.6	chr18	LMAN1	0.830864	7.16774	5.19799	4.24365747157986e-07	4.77589272430035e-05	6.06963
ENSG00000187601.4	chrX	MAGEH1	0.845851	4.30318	5.18155	4.59494318939947e-07	5.05820385521597e-05	6.0436
ENSG00000170542.6	chr6	SERPINB9	-1.32017	6.34373	-5.18926	4.42676947205504e-07	4.9542928341416e-05	6.03321
ENSG00000123131.13	chrX	PRDX4	1.47633	5.72001	5.18689	4.47779021642566e-07	4.97453598315374e-05	6.03043
ENSG00000282122.1	chr14	IGHV7-4-1	5.36333	-1.94152	5.47999	1.05392155825596e-07	1.78413863790473e-05	6.0179
ENSG00000115884.11	chr2	SDC1	2.41611	4.29119	5.17417	4.76167374344824e-07	5.20052285720492e-05	6.01051
ENSG00000211662.2	chr22	IGLV3-21	3.16861	4.78815	5.17356	4.77585866757464e-07	5.20052285720492e-05	5.99342
ENSG00000072110.13	chr14	ACTN1	-0.940284	4.21352	-5.16353	5.01249283164047e-07	5.37109936667007e-05	5.96424
ENSG00000237310.1	chr7	AC008267.5	0.949962	0.33623	5.25548	3.20868926866079e-07	3.75808403006812e-05	5.90247
ENSG00000166598.15	chr12	HSP90B1	0.86762	9.87027	5.1412	5.58093966473031e-07	5.79525925494805e-05	5.81863
ENSG00000188906.16	chr12	LRRK2	-0.896415	7.03416	-5.12377	6.06800508502199e-07	6.15953393662804e-05	5.73144
ENSG00000154065.17	chr18	ANKRD29	-3.72344	-0.142044	-5.23679	3.51485052182981e-07	4.08376133110187e-05	5.70915
ENSG00000149428.19	chr11	HYOU1	0.995145	6.78087	5.11713	6.26401054546959e-07	6.24695507121213e-05	5.70212
ENSG00000118557.15	chr16	PMFBP1	-1.99426	-0.0504852	-5.21877	3.83672665407933e-07	4.3915260480925e-05	5.65853
ENSG00000201217.1	chr3	RF00019	-1.95093	-0.73295	-5.26128	3.11904454705908e-07	3.69974599894513e-05	5.64273
ENSG00000144218.18	chr2	AFF3	-0.901166	7.06112	-5.1015	6.75025018242296e-07	6.65780206743578e-05	5.63063
ENSG00000153162.9	chr6	BMP6	2.01828	2.57212	5.05318	8.4958560711142e-07	7.81502376952491e-05	5.42824
ENSG00000101236.17	chr20	RNF24	-0.936373	3.45732	-5.03941	9.06862616330749e-07	8.26640154116875e-05	5.41647
ENSG00000119900.9	chr6	OGFRL1	-0.801614	6.80975	-5.04328	8.90393471164456e-07	8.15317112573089e-05	5.36958
ENSG00000069493.15	chr12	CLEC2D	-0.975791	6.23762	-5.01938	9.9686855389761e-07	8.85606518278955e-05	5.267
ENSG00000128590.5	chr7	DNAJB9	1.10629	6.28894	5.01823	1.00232457765005e-06	8.85606518278955e-05	5.26131
ENSG00000234289.5	chr21	H2BFS	1.32184	-0.478379	5.13717	5.69024383905217e-07	5.87845959680544e-05	5.22052
ENSG00000283399.1	chr16	AC004381.2	-2.22975	0.0496878	-5.09941	6.81773410642835e-07	6.66714823174753e-05	5.19828
ENSG00000231789.2	chr1	PIK3CD-AS2	1.14024	1.5527	5.02861	9.54371167219824e-07	8.6073876416351e-05	5.19735
ENSG00000124772.12	chr6	CPNE5	1.1752	7.28488	5.0039	1.07234062335448e-06	9.27137418775796e-05	5.19299
ENSG00000239975.2	chr2	IGKV1D-33	2.96703	1.41572	5.02035	9.92355722073699e-07	8.85606518278955e-05	5.14136
ENSG00000198937.9	chr6	CCDC167	0.974372	2.82084	4.96732	1.27327197086113e-06	0.000105556	5.07998
ENSG00000005187.12	chr16	ACSM3	-1.31549	3.87033	-4.92002	1.58774266540505e-06	0.00012208	4.89704
ENSG00000044574.8	chr9	HSPA5	0.944056	9.31562	4.93108	1.50811481432363e-06	0.000117756	4.87724
ENSG00000138166.6	chr10	DUSP5	1.76781	6.90264	4.9139	1.63351154376605e-06	0.000124648	4.79634
ENSG00000173542.8	chr4	MOB1B	-0.984968	5.90303	-4.90929	1.66890027001584e-06	0.000126868	4.78564
ENSG00000180879.13	chrX	SSR4	1.33666	8.07346	4.89131	1.81388246611732e-06	0.00013336	4.69807
ENSG00000113494.17	chr5	PRLR	-2.48142	-0.699551	-5.01862	1.00046111686497e-06	8.85606518278955e-05	4.69598
ENSG00000130396.20	chr6	AFDN	-1.18818	5.69416	-4.88586	1.86025958455007e-06	0.000136016	4.6875
ENSG00000082512.15	chr1	TRAF5	-0.932952	7.14101	-4.88548	1.86350712398038e-06	0.000136016	4.67155
ENSG00000250746.1	chr4	AC105250.1	1.17486	0.305904	4.95207	1.36744043183906e-06	0.000110188	4.66383
ENSG00000281530.1	chr22	AC004461.2	-1.85044	-1.42248	-5.06773	7.92850591150311e-07	7.41432979731106e-05	4.65557
ENSG00000213149.3	chr6	CNN2P9	-1.14607	-0.758609	-5.00434	1.07010523566889e-06	9.27137418775796e-05	4.62468
ENSG00000211897.9	chr14	IGHG3	2.46808	6.1719	4.86932	2.00794731463834e-06	0.000144982	4.60731
ENSG00000148400.11	chr9	NOTCH1	-0.845194	6.38747	-4.86973	2.00416313476337e-06	0.000144982	4.60669
ENSG00000128228.5	chr22	SDF2L1	1.07864	5.13089	4.86125	2.08404185440416e-06	0.000148681	4.59677
ENSG00000135046.14	chr9	ANXA1	-1.03748	5.45123	-4.85778	2.11758592806692e-06	0.000150207	4.57162
ENSG00000128596.17	chr7	CCDC136	-1.11407	1.87172	-4.85214	2.17324278306346e-06	0.000153077	4.51286
ENSG00000223336.1	chr13	RNU2-6P	-2.16748	-1.30655	-5.01225	1.03097325255756e-06	9.06941317588295e-05	4.48675
ENSG00000269318.1	chr19	AC007292.2	-1.3411	-1.19661	-4.9994	1.09528385569543e-06	9.42927062948054e-05	4.47468
ENSG00000168350.8	chr14	DEGS2	-1.69	2.51529	-4.82739	2.43487479381932e-06	0.000164599	4.47204
ENSG00000245552.6	chr11	AP000787.1	-1.00763	1.43121	-4.85424	2.15242488755626e-06	0.000152142	4.46452
ENSG00000170476.15	chr5	MZB1	1.25178	7.94877	4.82389	2.47420990764174e-06	0.000166042	4.4051
ENSG00000139973.16	chr14	SYT16	-2.53941	-2.42355	-5.10156	6.74816730137492e-07	6.65780206743578e-05	4.36778
ENSG00000163491.16	chr3	NEK10	-1.24968	-0.962291	-4.94434	1.41769973751623e-06	0.000111998	4.33806
ENSG00000155660.11	chr7	PDIA4	1.07839	7.49801	4.80717	2.67085575749481e-06	0.000176988	4.33223
ENSG00000093134.14	chr6	VNN3	-1.63725	0.351849	-4.86087	2.08764241579203e-06	0.000148681	4.31351
ENSG00000084110.11	chr12	HAL	-1.2796	1.4565	-4.80363	2.71448077635344e-06	0.000178438	4.2646
ENSG00000187231.14	chr2	SESTD1	-1.57744	4.85515	-4.77584	3.0808313764752e-06	0.000195561	4.24101
ENSG00000174945.13	chr7	AMZ1	-1.54012	0.695288	-4.82482	2.46372002651423e-06	0.000165992	4.23269
ENSG00000271795.1	chr5	AC011337.1	-1.64067	-1.53386	-4.96242	1.30283959277668e-06	0.000107564	4.22193
ENSG00000188761.13	chr1	BCL2L15	-1.82015	1.58913	-4.78631	2.93743713693811e-06	0.000188454	4.21245
ENSG00000099958.14	chr22	DERL3	1.22499	6.30555	4.7754	3.08703397123374e-06	0.000195561	4.2007
ENSG00000262001.1	chr18	DLGAP1-AS2	-1.33418	1.23368	-4.79461	2.8284350153657e-06	0.000184996	4.19769
ENSG00000004866.20	chr7	ST7	0.846876	4.01213	4.73854	3.64829238980134e-06	0.000224755	4.12077
ENSG00000065911.12	chr2	MTHFD2	0.814261	5.25897	4.7449	3.54477293033289e-06	0.000219721	4.09369
ENSG00000103647.12	chr15	CORO2B	-2.91574	4.44577	-4.72818	3.82288096784922e-06	0.000231267	4.05812
ENSG00000239672.7	chr17	NME1	0.912275	1.98393	4.72899	3.80906827913827e-06	0.000231126	4.02643
ENSG00000241886.1	chrX	AC112496.1	-2.2183	-3.06109	-5.08636	7.25563837330175e-07	6.92724336635847e-05	4.00877
ENSG00000135373.12	chr11	EHF	-3.29196	-1.7608	-4.90601	1.69448640364655e-06	0.000127315	3.93389
ENSG00000268279.4	chr3	AC090004.1	-1.69521	-0.883856	-4.81973	2.52176660544713e-06	0.000168215	3.89178
ENSG00000256588.1	chr11	AC027544.2	-2.14997	-2.36203	-4.96016	1.31668396492638e-06	0.000108212	3.89074
ENSG00000256229.8	chr19	ZNF486	-0.922409	4.02337	-4.66485	5.07991250471303e-06	0.000290724	3.8133
ENSG00000279491.1	chr11	AP003733.4	-1.63361	-1.2913	-4.82814	2.42649570097696e-06	0.000164585	3.8076
ENSG00000211667.3	chr22	IGLV3-12	2.86609	-2.53648	4.95625	1.34100753883878e-06	0.00010893	3.80221
ENSG00000211637.2	chr22	IGLV4-69	2.35014	2.54329	4.6379	5.72793192213237e-06	0.000320526	3.70286
ENSG00000105974.12	chr7	CAV1	1.84117	0.46477	4.68819	4.57625806307665e-06	0.000270348	3.66613
ENSG00000250900.6	chr5	AC008443.6	-1.61062	-2.44054	-4.90427	1.70822853344549e-06	0.000127453	3.66165
ENSG00000146373.16	chr6	RNF217	-1.28449	0.279809	-4.68255	4.69325514114774e-06	0.000273035	3.61466
ENSG00000111817.17	chr6	DSE	-1.13915	5.52516	-4.63261	5.86424912130242e-06	0.000326341	3.61298
ENSG00000167077.13	chr22	MEI1	0.880086	4.79419	4.62266	6.12903106441035e-06	0.000335514	3.60049
ENSG00000219626.9	chr2	FAM228B	-0.885391	2.3323	-4.61318	6.39206694346154e-06	0.000343527	3.59235
ENSG00000251739.1	chr4	RNU6-1053P	-2.11847	-1.98891	-4.83386	2.36373389696631e-06	0.000161415	3.59191
ENSG00000231292.6	chr2	IGKV1OR2-108	2.59561	-1.45522	4.78054	3.01570427632077e-06	0.000192251	3.58394
ENSG00000118363.12	chr11	SPCS2	0.869182	6.68417	4.62862	5.9689423363104e-06	0.000330993	3.57741
ENSG00000119535.17	chr1	CSF3R	-1.19978	4.88122	-4.61771	6.26485528906003e-06	0.000340177	3.57587
ENSG00000196562.14	chr20	SULF2	-1.41931	3.71471	-4.60173	6.72416796380203e-06	0.000353677	3.56581
ENSG00000233493.3	chr19	TMEM238	0.80449	2.90044	4.59456	6.94042359921187e-06	0.000364101	3.54231
ENSG00000136732.16	chr2	GYPC	0.924145	6.06418	4.61308	6.39476276640511e-06	0.000343527	3.51956
ENSG00000144908.13	chr3	ALDH1L1	2.93279	-4.4656	5.1659	4.95545774565195e-07	5.36607794576014e-05	3.4873
ENSG00000211890.4	chr14	IGHA2	2.04292	5.24933	4.58824	7.13660378573411e-06	0.00036972	3.4383
ENSG00000063241.8	chr19	ISOC2	0.840627	3.95364	4.57237	7.653094333714e-06	0.00038531	3.4369
ENSG00000211668.2	chr22	IGLV2-11	2.67059	4.03144	4.55833	8.13986601302602e-06	0.000400923	3.37617
ENSG00000026751.17	chr1	SLAMF7	1.44053	6.26542	4.5777	7.47568656873412e-06	0.000379339	3.37004
ENSG00000147535.17	chr8	PLPP5	1.01649	5.52241	4.56818	7.79530402680756e-06	0.000387999	3.34632
ENSG00000111664.10	chr12	GNB3	1.71785	4.10721	4.5466	8.56950886864593e-06	0.000414983	3.32472
ENSG00000143669.13	chr1	LYST	-0.981557	7.11415	-4.56691	7.83893860213329e-06	0.000387999	3.31983
ENSG00000282508.1	chr19	LINC01002	-2.03436	0.620363	-4.58815	7.13929463064127e-06	0.00036972	3.31093
ENSG00000180596.7	chr6	HIST1H2BC	1.45766	1.65165	4.54939	8.46539571781632e-06	0.000413921	3.28868
ENSG00000158373.8	chr6	HIST1H2BD	1.06175	3.14125	4.5273	9.32388562129706e-06	0.000432678	3.27634
ENSG00000276651.1	chr15	AC007950.3	-1.69	-2.9109	-4.8491	2.20388310765236e-06	0.000154157	3.27213
ENSG00000104635.14	chr8	SLC39A14	0.920993	4.45575	4.53807	8.89532884406155e-06	0.000423632	3.27109
ENSG00000204131.9	chrX	NHSL2	-1.61618	2.0152	-4.53482	9.0227467445597e-06	0.000423691	3.26338
ENSG00000131871.15	chr15	SELENOS	0.835427	5.12459	4.54282	8.71246224517502e-06	0.000420893	3.2567
ENSG00000237440.9	chr19	AC008554.1	-0.867156	5.60354	-4.53733	8.92399409297804e-06	0.000423691	3.21729
ENSG00000123989.14	chr2	CHPF	1.40403	5.42271	4.53536	9.00116269459952e-06	0.000423691	3.21484
ENSG00000279039.1	chr19	AC011447.6	-2.3786	-2.59688	-4.79169	2.8663028522753e-06	0.000186263	3.21051
ENSG00000160469.16	chr19	BRSK1	1.7852	1.23227	4.53674	8.94728844129615e-06	0.000423691	3.19599
ENSG00000155304.6	chr21	HSPA13	0.850163	6.16564	4.51741	9.73474041477023e-06	0.000444686	3.12381
ENSG00000211659.2	chr22	IGLV3-25	2.76838	4.04392	4.49218	1.08635542453819e-05	0.000479522	3.10849
ENSG00000228784.8	chr2	LINC00954	-1.54434	1.03402	-4.51783	9.7171096154853e-06	0.000444686	3.10117
ENSG00000145014.17	chr3	TMEM44	-1.03353	2.0345	-4.48423	1.12443687271829e-05	0.000489239	3.06952
ENSG00000273143.1	chr10	AL355512.1	2.22898	-2.04261	4.6855	4.63160651360687e-06	0.000272022	3.05523
ENSG00000014914.21	chr1	MTMR11	-1.50052	0.699371	-4.51243	9.94833463593231e-06	0.000450944	3.03854
ENSG00000100196.11	chr22	KDELR3	2.14881	0.832578	4.50109	1.04510438805398e-05	0.0004689	3.01359
ENSG00000241490.1	chr3	AC093010.2	-1.39884	0.50631	-4.50896	1.00995265865363e-05	0.000454983	2.99959
ENSG00000051108.15	chr16	HERPUD1	1.02343	9.06857	4.48311	1.12989560018497e-05	0.000490555	2.98274
ENSG00000233452.6	chr6	STXBP5-AS1	-1.33658	-1.23332	-4.59284	6.99323544287164e-06	0.000365919	2.97815
ENSG00000155657.26	chr2	TTN	-2.27361	5.11948	-4.47237	1.18368613983654e-05	0.000504699	2.97065
ENSG00000100557.9	chr14	CCDC198	-3.95458	-2.45363	-4.70224	4.29646975421276e-06	0.000258365	2.96406
ENSG00000185436.12	chr1	IFNLR1	1.04838	4.84117	4.46278	1.23371102999505e-05	0.000518854	2.9455
ENSG00000071242.12	chr6	RPS6KA2	-1.47661	4.32154	-4.44715	1.3197542490828e-05	0.000544804	2.91246
ENSG00000124635.8	chr6	HIST1H2BJ	1.09076	0.812267	4.47389	1.17593001501983e-05	0.000502954	2.90994
ENSG00000099139.13	chr9	PCSK5	-1.62639	-0.266068	-4.50854	1.0118264437699e-05	0.000454983	2.88091
ENSG00000119139.19	chr9	TJP2	-1.70047	-0.703582	-4.53023	9.2051785170715e-06	0.000428984	2.87821
ENSG00000272620.1	chr4	AFAP1-AS1	2.58637	-4.24977	4.93017	1.51450814647722e-06	0.000117798	2.87813
ENSG00000130768.15	chr1	SMPDL3B	2.2631	-0.448296	4.51506	9.83493190303082e-06	0.000448246	2.87265
ENSG00000267383.6	chr19	AC011447.3	-1.51418	0.103781	-4.48909	1.10098803763078e-05	0.000482161	2.86898
ENSG00000187240.15	chr11	DYNC2H1	-1.07588	1.74702	-4.42573	1.44699424975999e-05	0.000579517	2.82576
ENSG00000152785.7	chr4	BMP3	-2.30843	4.79025	-4.42424	1.45626208580288e-05	0.000582071	2.79374
ENSG00000204228.4	chr6	HSD17B8	0.928961	3.48466	4.39896	1.62258311835216e-05	0.000623797	2.76429
ENSG00000167555.14	chr19	ZNF528	-0.814245	4.18566	-4.39428	1.65533605597979e-05	0.000633969	2.71084
ENSG00000228589.3	chr1	SPCS2P4	0.878468	1.22345	4.40121	1.60705463745458e-05	0.000620194	2.68719
ENSG00000137168.8	chr6	PPIL1	0.804991	3.87847	4.38353	1.73288769321612e-05	0.00065742	2.68639
ENSG00000100219.16	chr22	XBP1	1.08754	8.8147	4.40518	1.58003134820057e-05	0.000614474	2.66739
ENSG00000162746.14	chr1	FCRLB	1.27288	4.02567	4.37735	1.77906353356511e-05	0.000671147	2.65385
ENSG00000134627.12	chr11	PIWIL4	-1.42233	0.794348	-4.39292	1.66497719334201e-05	0.000636451	2.6101
ENSG00000262877.4	chr17	AC110285.2	-2.49325	-2.1067	-4.55461	8.27385463219012e-06	0.000406529	2.58943
ENSG00000282980.1	chr17	AC055839.1	-1.60619	-1.2565	-4.48154	1.13764037412542e-05	0.000490873	2.58386
ENSG00000177045.9	chr19	SIX5	0.917245	2.89921	4.33743	2.10704607944791e-05	0.000771818	2.53687
ENSG00000065320.9	chr17	NTN1	-1.63528	-0.608244	-4.42855	1.42956741227746e-05	0.000574823	2.53665
ENSG00000272630.1	chr10	AL731563.3	-1.28199	-0.797401	-4.43654	1.3813256982522e-05	0.000561451	2.52891
ENSG00000147437.10	chr8	GNRH1	-1.39265	-0.145662	-4.40423	1.58646214588444e-05	0.000614602	2.52672
ENSG00000264176.1	chr17	MAGOH2P	-2.25355	-3.47257	-4.69318	4.47488528879982e-06	0.000267497	2.51924
ENSG00000261008.6	chr16	LINC01572	-1.31006	-0.452929	-4.41492	1.51556344276709e-05	0.000596923	2.51583
ENSG00000242076.2	chr2	IGKV1-33	2.82129	1.20199	4.35236	1.97810274115176e-05	0.000736578	2.50527
ENSG00000263345.1	chr17	AC006435.2	-2.01253	-2.43205	-4.54866	8.49266121112503e-06	0.000414249	2.46088
ENSG00000197321.14	chr10	SVIL	-1.02964	2.24831	-4.31809	2.28598123966789e-05	0.000820384	2.45087
ENSG00000247982.6	chr15	LINC00926	-1.17576	7.55537	-4.33919	2.09145831904409e-05	0.000770245	2.40046
ENSG00000145248.7	chr4	SLC10A4	-1.85453	-3.20058	-4.61403	6.36779799317136e-06	0.000343527	2.38403
ENSG00000239653.1	chr3	PSMD6-AS2	-1.29447	1.16796	-4.31488	2.3170598695268e-05	0.000822666	2.36534
ENSG00000221866.9	chr7	PLXNA4	-1.94641	-2.21797	-4.49434	1.07618615195138e-05	0.000478582	2.35338
ENSG00000275410.5	chr17	HNF1B	-2.15721	2.73503	-4.28833	2.59014015901698e-05	0.000885881	2.35035
ENSG00000172264.17	chr20	MACROD2	-1.65995	6.14652	-4.32397	2.23012917645689e-05	0.000803684	2.34854
ENSG00000211670.2	chr22	IGLV3-9	2.27502	1.32439	4.30251	2.44071646912559e-05	0.000849192	2.33441
ENSG00000211899.10	chr14	IGHM	1.36923	14.5658	4.29836	2.48353958529283e-05	0.000859638	2.296
ENSG00000158106.14	chr8	RHPN1	-1.63644	4.8037	-4.29726	2.49502783686273e-05	0.000860656	2.29234
ENSG00000188158.15	chrX	NHS	-1.79067	-1.89524	-4.44534	1.33002701016156e-05	0.000547922	2.28974
ENSG00000184164.14	chr22	CRELD2	0.885858	5.86669	4.30533	2.41196652012745e-05	0.000845823	2.28097
ENSG00000187510.9	chr12	C12orf74	-1.13728	4.26422	-4.28257	2.6532855568054e-05	0.000900917	2.2697
ENSG00000215769.8	chr17	ARHGAP27P1-BPTFP1-KPNA2P3	-1.3794	1.13887	-4.28229	2.65646293357787e-05	0.000900917	2.24467
ENSG00000170962.13	chr11	PDGFD	2.14487	0.145934	4.30826	2.38246937059311e-05	0.000839071	2.22782
ENSG00000201544.1	chr1	SNORA16B	-1.97544	-3.22536	-4.56729	7.82597778380501e-06	0.000387999	2.22693
ENSG00000196743.8	chr5	GM2A	0.836696	6.83551	4.29462	2.52277064882663e-05	0.000867256	2.22625
ENSG00000112486.16	chr6	CCR6	-1.42247	0.325864	-4.29932	2.47357545077852e-05	0.000857662	2.21863
ENSG00000262514.1	chr16	AC020978.6	-1.77964	-1.68812	-4.40217	1.60047890042561e-05	0.000618842	2.20379
ENSG00000112812.16	chr6	PRSS16	1.48246	3.12696	4.24728	3.07374255050341e-05	0.000996117	2.19251
ENSG00000134571.10	chr11	MYBPC3	-2.10257	-0.655917	-4.32865	2.18653439928375e-05	0.000790102	2.18109
ENSG00000267702.1	chr18	AP005131.6	-1.59897	-0.358211	-4.31294	2.33612052906021e-05	0.000827085	2.17459
ENSG00000147459.18	chr8	DOCK5	-1.30932	2.00578	-4.24273	3.13240004489918e-05	0.00100964	2.16141
ENSG00000136770.11	chr10	DNAJC1	0.824372	4.33361	4.25154	3.019864469275e-05	0.000988261	2.14543
ENSG00000261732.1	chr16	AL031708.1	-1.56933	-1.98657	-4.4086	1.55713091694854e-05	0.000609095	2.14191
ENSG00000162591.16	chr1	MEGF6	-1.34928	5.26485	-4.26371	2.87070350174644e-05	0.000946486	2.13849
ENSG00000099337.5	chr19	KCNK6	0.80081	4.39142	4.24863	3.05665309665733e-05	0.000993166	2.13032
ENSG00000233836.7	chr19	AC139769.1	-0.85545	0.921766	-4.25137	3.0219357453845e-05	0.000988261	2.11345
ENSG00000239884.3	chr17	RN7SL608P	-1.78759	-2.62598	-4.46161	1.24000361314045e-05	0.000520414	2.11259
ENSG00000211669.3	chr22	IGLV3-10	2.30653	2.4405	4.22529	3.36726258123853e-05	0.00106993	2.11155
ENSG00000164050.13	chr3	PLXNB1	-1.41931	2.65242	-4.21774	3.47403958612253e-05	0.00109583	2.08626
ENSG00000252414.1	chr2	RNU6-100P	-1.74991	-2.29336	-4.41743	1.49937182566826e-05	0.000593415	2.07863
ENSG00000163625.15	chr4	WDFY3	-0.963108	2.47494	-4.20943	3.59537940125973e-05	0.00112759	2.05367
ENSG00000075223.14	chr7	SEMA3C	-1.34325	-0.501124	-4.28027	2.6790004749072e-05	0.000907033	2.04025
ENSG00000213066.13	chr6	FGFR1OP	-0.807899	3.13289	-4.20581	3.649429145828e-05	0.00113472	2.03683
ENSG00000142405.21	chr19	NLRP12	-1.40623	1.6265	-4.21318	3.54016156223548e-05	0.00111258	2.03326
ENSG00000099251.14	chr10	HSD17B7P2	-1.35486	1.89735	-4.20607	3.64552658772238e-05	0.00113472	2.02263
ENSG00000184465.16	chr6	WDR27	-1.25362	3.189	-4.19256	3.85402399058894e-05	0.00118265	1.9858
ENSG00000159556.10	chr15	ISL2	1.74351	-2.18688	4.37771	1.77636638452262e-05	0.000671147	1.98262
ENSG00000211892.4	chr14	IGHG4	3.03474	4.95361	4.21761	3.47596101998162e-05	0.00109583	1.97597
ENSG00000211640.4	chr22	IGLV6-57	1.90176	3.90323	4.19869	3.75813320527438e-05	0.00116473	1.97311
ENSG00000225178.5	chr19	RPSAP58	1.16121	5.19189	4.2146	3.51942126610201e-05	0.00110779	1.95227
ENSG00000143630.10	chr1	HCN3	-1.05179	0.288175	-4.22441	3.37956614043543e-05	0.00107215	1.95173
ENSG00000211771.1	chr7	TRBJ2-7	-1.82516	-1.578	-4.31682	2.29823528845587e-05	0.000820886	1.9491
ENSG00000259772.6	chr15	AC012236.1	1.79255	0.807553	4.20654	3.63839802454807e-05	0.00113472	1.94379
ENSG00000183087.15	chr13	GAS6	1.52862	3.25347	4.1791	4.07323943659308e-05	0.00122713	1.93348
ENSG00000276058.1	chr12	STMN1P1	-1.69677	-2.72192	-4.41094	1.54158412039885e-05	0.000605365	1.9196
ENSG00000203286.5	chr9	RF00017	-1.86236	-1.88177	-4.32872	2.18592312127205e-05	0.000790102	1.91007
ENSG00000228288.6	chr1	PCAT6	1.23667	-0.529835	4.23874	3.18476678219071e-05	0.00102487	1.89422
ENSG00000109501.13	chr4	WFS1	0.943566	4.01316	4.17969	4.06331922925767e-05	0.00122713	1.89402
ENSG00000196371.3	chr11	FUT4	-1.20839	3.63527	-4.17094	4.21179364549137e-05	0.00125666	1.88518
ENSG00000168268.11	chr3	NT5DC2	1.17679	4.52893	4.18625	3.95537501431229e-05	0.00120116	1.88265
ENSG00000213903.9	chr14	LTB4R	-1.38799	-0.360648	-4.22632	3.35296983601189e-05	0.00106707	1.87665
ENSG00000283930.1	chr10	AL117339.5	-1.98287	-0.811037	-4.24645	3.08438187394259e-05	0.000997349	1.87475
ENSG00000148600.15	chr10	CDHR1	-2.96056	2.19172	-4.16167	4.37468980293345e-05	0.0012941	1.87301
ENSG00000249679.1	chr4	AC106897.1	1.94522	-1.66746	4.29765	2.49097617818251e-05	0.000860656	1.8641
ENSG00000211961.3	chr14	IGHV1-45	2.95165	-2.68714	4.38506	1.72162844703843e-05	0.000654381	1.84978
ENSG00000269680.1	chr19	AC008760.1	-2.06921	-1.06987	-4.25254	3.00738128506766e-05	0.000987824	1.84765
ENSG00000279236.1	chr18	AC064801.2	-1.73692	-2.13987	-4.33113	2.16377094377969e-05	0.00078539	1.84639
ENSG00000237172.4	chr16	B3GNT9	1.10702	2.14238	4.15395	4.51488061935723e-05	0.0013239	1.84366
ENSG00000260101.1	chr2	AC008074.2	0.910629	3.18787	4.14883	4.61023849667493e-05	0.00134404	1.8235
ENSG00000128872.10	chr15	TMOD2	-1.16558	4.17935	-4.16386	4.33569690626621e-05	0.00128824	1.82262
ENSG00000213673.3	chr7	SLC25A5P3	1.19226	-2.40893	4.34535	2.03766476893617e-05	0.000755962	1.81242
ENSG00000233999.3	chr2	IGKV3OR2-268	2.185	-1.58351	4.27204	2.77268698438442e-05	0.00093093	1.8008
ENSG00000161381.14	chr17	PLXDC1	-1.71521	-1.33234	-4.25226	3.01079119794832e-05	0.000987824	1.79292
ENSG00000211964.3	chr14	IGHV3-48	3.01082	2.42317	4.13363	4.90466046642643e-05	0.00141149	1.77618
ENSG00000178718.6	chr15	RPP25	1.08634	2.455	4.12492	5.08156916106542e-05	0.0014421	1.74497
ENSG00000117115.13	chr1	PADI2	-1.20733	2.36892	-4.12287	5.12391571441167e-05	0.0014469	1.73656
ENSG00000226767.1	chr7	AC114501.1	-2.65659	0.675344	-4.1405	4.76948592939613e-05	0.00137886	1.70098
ENSG00000211663.2	chr22	IGLV3-19	2.66712	4.00391	4.12686	5.04160123826902e-05	0.00143451	1.69652
ENSG00000230021.10	chr1	AL669831.3	-1.24781	-0.661396	-4.18602	3.95915928403906e-05	0.00120116	1.69652
ENSG00000286118.1	chrX	AC234031.2	1.14602	-1.34345	4.21958	3.44778706037966e-05	0.00109207	1.68326
ENSG00000251039.2	chr2	IGKV2D-40	2.38243	-0.122814	4.15513	4.49316829697811e-05	0.00132139	1.66596
ENSG00000285994.1	chr10	AL731559.1	-1.52027	-1.06611	-4.197	3.78432145116069e-05	0.00117105	1.66427
ENSG00000215895.4	chr1	AL354702.1	0.919919	0.821473	4.12267	5.12824604656514e-05	0.0014469	1.65247
ENSG00000239415.1	chr21	AP001469.3	-1.56874	-2.24258	-4.27678	2.71830895405649e-05	0.000917259	1.64428
ENSG00000243066.3	chr19	RN7SL842P	-1.8825	-1.0308	-4.18757	3.93400417261995e-05	0.00119895	1.63969
ENSG00000235381.1	chr6	AL596202.1	-1.12271	-0.0244667	-4.14044	4.77073588479619e-05	0.00137886	1.62787
ENSG00000180535.3	chr7	BHLHA15	1.61037	2.24609	4.08876	5.88251047719002e-05	0.00161448	1.61207
ENSG00000266777.1	chr17	SH3GL1P1	-1.2726	-0.715347	-4.16316	4.34807133198612e-05	0.00129001	1.61202
ENSG00000211950.2	chr14	IGHV1-24	2.19694	2.19109	4.08897	5.87757183292237e-05	0.00161448	1.61171
ENSG00000280411.1	chr14	IGHV1-69D	2.8448	2.1907	4.08812	5.89768163216901e-05	0.00161645	1.60868
ENSG00000127074.14	chr1	RGS13	2.72953	-0.446681	4.14138	4.75234291978255e-05	0.0013775	1.57842
ENSG00000134986.13	chr5	NREP	-1.5981	5.35734	-4.1097	5.40499101123825e-05	0.00151227	1.54643
ENSG00000188157.15	chr1	AGRN	-0.811092	3.67124	-4.07958	6.1042791112491e-05	0.00165729	1.54418
ENSG00000111275.13	chr12	ALDH2	-1.19002	4.78365	-4.09722	5.68496285483477e-05	0.00157746	1.53027
ENSG00000171291.8	chr19	ZNF439	-0.802774	4.25494	-4.08411	5.99385358958945e-05	0.00163613	1.51898
ENSG00000248019.2	chr4	FAM13A-AS1	-1.27719	2.86677	-4.05532	6.7291178666511e-05	0.00178132	1.4914
ENSG00000172322.14	chr12	CLEC12A	-1.29947	2.47716	-4.05014	6.87022102091503e-05	0.00179975	1.47666
ENSG00000161996.19	chr16	WDR90	-1.01772	3.43437	-4.05122	6.84057213546254e-05	0.00179665	1.45464
ENSG00000211973.2	chr14	IGHV1-69	3.34988	-0.0515657	4.08047	6.08241776720341e-05	0.00165581	1.42323
ENSG00000143297.19	chr1	FCRL5	0.981865	7.57787	4.08517	5.96816288633439e-05	0.00163354	1.42266
ENSG00000175984.15	chr1	DENND2C	1.47887	-0.182111	4.0837	6.00380288434372e-05	0.00163663	1.41924
ENSG00000180509.12	chr21	KCNE1	-1.78647	-1.9335	-4.17658	4.11554657419682e-05	0.00123743	1.40984
ENSG00000102886.15	chr16	GDPD3	-1.51111	1.22018	-4.03579	7.27607334273298e-05	0.0018792	1.38297
ENSG00000187922.13	chr9	LCN10	-1.9159	-0.223148	-4.07306	6.26649652989321e-05	0.00168768	1.37915
ENSG00000129219.14	chr17	PLD2	-0.840281	4.01208	-4.03915	7.17910409634745e-05	0.0018637	1.37176
ENSG00000138658.15	chr4	ZGRF1	-0.92604	3.16116	-4.02424	7.61905537231592e-05	0.00193551	1.37026
ENSG00000165646.13	chr10	SLC18A2	-1.62139	-2.23733	-4.18764	3.93287348130681e-05	0.00119895	1.36672
ENSG00000168447.11	chr16	SCNN1B	2.11713	-0.333145	4.05401	6.76459513329811e-05	0.00178722	1.30325
ENSG00000162804.14	chr2	SNED1	-1.85626	2.74907	-4.00165	8.33482150142711e-05	0.0020515	1.302
ENSG00000248863.2	chr4	AC097376.1	-1.37729	-1.51555	-4.11219	5.35083554013093e-05	0.0014992	1.30109
ENSG00000266998.1	chr17	AC111182.1	-1.81207	-2.392	-4.17898	4.0752119493386e-05	0.00122713	1.29837
ENSG00000203872.7	chr6	C6orf163	-0.980585	-0.061875	-4.0383	7.2033740196628e-05	0.00186519	1.28195
ENSG00000177483.11	chr2	RBM44	-1.78165	-0.23472	-4.03859	7.19518337119814e-05	0.00186519	1.26395
ENSG00000249915.8	chr5	PDCD6	-1.09628	3.1857	-3.99317	8.61963510895898e-05	0.00210476	1.25781
ENSG00000226318.1	chr10	RPS3AP38	-1.74414	-2.63511	-4.18712	3.94120221760462e-05	0.00119933	1.25512
ENSG00000143452.16	chr1	HORMAD1	-1.48605	-0.929243	-4.06338	6.51505449371621e-05	0.00174297	1.25199
ENSG00000160796.17	chr3	NBEAL2	-0.890305	6.66862	-4.03546	7.28544005975059e-05	0.0018792	1.23944
ENSG00000229832.1	chr1	AL360091.1	-1.65255	-2.74018	-4.19074	3.88305541677186e-05	0.00118882	1.23552
ENSG00000182621.18	chr20	PLCB1	-1.16292	1.23162	-3.99081	8.70086955780654e-05	0.00212182	1.22986
ENSG00000231205.11	chr19	ZNF826P	-1.04862	3.01982	-3.98288	8.97808456475364e-05	0.00216344	1.22788
ENSG00000270055.1	chr15	AC127502.2	-1.25072	2.45987	-3.97853	9.1334951745477e-05	0.0021852	1.2236
ENSG00000273448.1	chr7	AC006480.2	-1.59932	-0.810224	-4.04371	7.04932096550826e-05	0.00183711	1.20662
ENSG00000198754.5	chr1	OXCT2	1.85613	-0.820358	4.04066	7.13588708717261e-05	0.00185487	1.19529
ENSG00000034971.17	chr1	MYOC	-3.11415	-4.4828	-4.38588	1.71566168541833e-05	0.000653346	1.17546
ENSG00000273136.7	chr1	NBPF26	-1.02355	3.17257	-3.96939	9.46886162911571e-05	0.00223623	1.17364
ENSG00000272752.6	chr7	STAG3L5P-PVRIG2P-PILRB	-1.92742	-2.62413	-4.15155	4.55928612629005e-05	0.00133305	1.15079
ENSG00000279744.1	chr17	AC132938.5	-1.82703	-0.600652	-4.01727	7.83335296240907e-05	0.00196389	1.15013
ENSG00000158406.4	chr6	HIST1H4H	1.04977	2.91716	3.95805	9.9011048180626e-05	0.00230935	1.14351
ENSG00000151062.15	chr12	CACNA2D4	-1.03996	0.5259	-3.97899	9.1168756307017e-05	0.00218463	1.14017
ENSG00000279077.1	chr18	AC023090.2	-1.43286	-1.75856	-4.07667	6.17609367251044e-05	0.00167003	1.13762
ENSG00000103021.9	chr16	CCDC113	-1.68725	-1.12468	-4.03565	7.2800369470186e-05	0.0018792	1.13132
ENSG00000200534.1	chr6	SNORA33	-1.36039	-0.647349	-4.01242	7.98599743234525e-05	0.00198305	1.12835
ENSG00000265625.1	chr17	AC104564.5	-1.51514	-0.734315	-4.01385	7.94069519494562e-05	0.00197732	1.12121
ENSG00000161638.11	chr12	ITGA5	-1.04425	4.14428	-3.96983	9.45239588747016e-05	0.00223496	1.1093
ENSG00000211952.3	chr14	IGHV4-28	2.24776	-2.26915	4.1044	5.5223860375026e-05	0.00154084	1.1026
ENSG00000232311.1	chr6	AL512303.1	-1.65363	-1.94276	-4.07574	6.19937681775856e-05	0.00167184	1.09349
ENSG00000197747.9	chr1	S100A10	-0.928867	5.66431	-3.98778	8.80582470851594e-05	0.0021347	1.0824
ENSG00000171246.6	chr17	NPTX1	-3.35022	0.476367	-3.96145	9.76967647671252e-05	0.00229223	1.07795
ENSG00000235545.1	chr1	AC103923.1	-1.04715	-1.74974	-4.05683	6.68841522837236e-05	0.00177287	1.07789
ENSG00000189068.11	chr19	VSTM1	-1.47708	0.466174	-3.96133	9.77428245629812e-05	0.00229223	1.07672
ENSG00000182986.13	chr19	ZNF320	-1.14786	-0.0136959	-3.96068	9.79925311061167e-05	0.00229336	1.03196
ENSG00000107611.15	chr10	CUBN	-1.28337	1.80847	-3.92378	0.000113246	0.00254615	1.02638
ENSG00000269054.1	chr19	AC012313.6	-1.48279	-2.25083	-4.0776	6.15306960764427e-05	0.00166604	1.02576
ENSG00000100979.15	chr20	PLTP	1.43549	2.92939	3.92237	0.000113872	0.00254808	1.01772
ENSG00000184731.6	chr2	FAM110C	-3.01845	0.0266934	-3.95412	0.000100555	0.00233372	1.01443
ENSG00000123384.13	chr12	LRP1	-1.10346	6.36547	-3.97305	9.33328203821022e-05	0.00221982	1.01279
ENSG00000224389.9	chr6	C4B	2.07041	0.580677	3.93222	0.00010957	0.00248888	0.989595
ENSG00000146350.14	chr6	TBC1D32	-0.836996	2.24869	-3.90863	0.000120143	0.00262789	0.981054
ENSG00000134198.10	chr1	TSPAN2	-1.21006	0.771611	-3.92473	0.000112828	0.00254242	0.9786
ENSG00000265791.1	chr17	AC127024.4	-1.27866	-1.69086	-4.01779	7.81721396138728e-05	0.00196389	0.969462
ENSG00000211664.3	chr22	IGLV2-18	2.77185	0.750598	3.92047	0.000114721	0.00255354	0.963062
ENSG00000261373.1	chr16	VPS9D1-AS1	0.941359	0.540274	3.92187	0.000114094	0.00254808	0.952478
ENSG00000174292.12	chr17	TNK1	-0.818662	1.21801	-3.90874	0.000120092	0.00262789	0.952324
ENSG00000207034.1	chr18	RF00019	-1.45406	-1.3045	-3.98506	8.90099047858847e-05	0.00215001	0.941115
ENSG00000129167.9	chr11	TPH1	-1.44623	-0.0193653	-3.92996	0.000110547	0.00250784	0.931637
ENSG00000136010.14	chr12	ALDH1L2	1.79785	2.66448	3.89385	0.00012725	0.00274166	0.926124
ENSG00000274925.1	chr16	ZKSCAN2-DT	-1.17694	0.597691	-3.91112	0.000118983	0.00260816	0.92141
ENSG00000091592.16	chr17	NLRP1	-0.87073	6.90941	-3.94872	0.000102709	0.00237824	0.919261
ENSG00000261123.1	chr16	AC009065.5	-1.95295	-2.7576	-4.08419	5.99186645752513e-05	0.00163613	0.913114
ENSG00000234336.6	chr7	JAZF1-AS1	-1.35049	-2.29306	-4.0433	7.06091583975982e-05	0.00183775	0.911908
ENSG00000239264.8	chr6	TXNDC5	1.09507	4.43534	3.9148	0.000117285	0.00258502	0.887903
ENSG00000111110.12	chr12	PPM1H	-0.925844	-0.243152	-3.92248	0.000113822	0.00254808	0.885819
ENSG00000153093.18	chr2	ACOXL	1.92516	-2.65709	4.06062	6.58757500478591e-05	0.0017577	0.870799
ENSG00000235033.7	chr6	AL590999.1	-3.29597	-0.617201	-3.92805	0.000111376	0.00251814	0.862296
ENSG00000270100.1	chr2	AC012065.4	-1.30656	-0.870111	-3.93752	0.00010732	0.00245398	0.859679
ENSG00000154589.6	chr8	LY96	0.800651	3.49695	3.88283	0.000132808	0.00282916	0.849123
ENSG00000071073.13	chr2	MGAT4A	-0.866855	4.17772	-3.8972	0.000125604	0.00271199	0.846217
ENSG00000236194.3	chr17	AC099811.1	-1.81422	-2.1648	-4.01093	8.0334151511722e-05	0.00198636	0.845129
ENSG00000163492.15	chr2	CCDC141	-1.61141	3.69479	-3.88086	0.000133823	0.00284074	0.827807
ENSG00000075391.16	chr1	RASAL2	-1.27527	-1.35344	-3.94281	0.00010512	0.00241464	0.801533
ENSG00000186567.12	chr19	CEACAM19	-2.06775	-3.11141	-4.0797	6.10135092864514e-05	0.00165729	0.799757
ENSG00000259767.1	chr15	AC022558.1	-1.60321	-1.8444	-3.97216	9.3662024743652e-05	0.00221988	0.798303
ENSG00000152953.13	chr4	STK32B	-2.01682	1.63959	-3.8575	0.000146461	0.00301375	0.798044
ENSG00000213658.11	chr16	LAT	-2.00249	-2.0251	-3.98452	8.91991540235198e-05	0.002152	0.797167
ENSG00000128965.13	chr15	CHAC1	1.33591	0.683053	3.87123	0.000138904	0.00291786	0.796787
ENSG00000211959.2	chr14	IGHV4-39	2.75278	3.88898	3.87536	0.000136703	0.00288143	0.792978
ENSG00000117411.16	chr1	B4GALT2	0.82706	3.17837	3.85946	0.00014536	0.00300814	0.787285
ENSG00000189136.9	chr15	UBE2Q2P1	-1.4472	-0.450264	-3.89542	0.000126476	0.00272789	0.777947
ENSG00000188687.17	chr2	SLC4A5	-1.07353	0.724478	-3.86011	0.000144998	0.00300814	0.763229
ENSG00000111452.13	chr12	ADGRD1	-1.62534	-0.52166	-3.88767	0.000130335	0.00279023	0.74567
ENSG00000283839.1	chr2	AC096667.1	-0.89335	1.6256	-3.83975	0.000156814	0.00316852	0.73846
ENSG00000206127.10	chr15	GOLGA8O	-2.16664	-1.97735	-3.96026	9.8154586045857e-05	0.00229388	0.734547
ENSG00000143847.15	chr1	PPFIA4	-1.69984	-1.34968	-3.92062	0.000114656	0.00255354	0.733844
ENSG00000213988.11	chr19	ZNF90	-0.918878	1.9962	-3.83608	0.000159041	0.00318805	0.733133
ENSG00000143942.5	chr2	CHAC2	0.973804	1.35412	3.8405	0.000156365	0.00316407	0.731806
ENSG00000147650.11	chr8	LRP12	-1.01829	-0.527012	-3.87772	0.000135459	0.00286482	0.713738
ENSG00000260641.1	chr4	AC114811.2	-1.87531	-2.51099	-3.99388	8.59551941429494e-05	0.00210142	0.711844
ENSG00000243107.1	chr7	AC000120.1	-1.70311	-1.34813	-3.91232	0.000118424	0.00260159	0.708659
ENSG00000279900.1	chr11	AP001767.4	-2.00473	-1.77685	-3.92491	0.00011275	0.00254242	0.669149
ENSG00000276116.2	chr14	FUT8-AS1	0.845661	2.32444	3.81523	0.000172259	0.00333669	0.66311
ENSG00000205795.4	chr2	CYS1	-3.12816	-0.116932	-3.84851	0.000151622	0.0030978	0.661954
ENSG00000255710.2	chr11	AP003170.1	-1.58408	-1.1376	-3.88588	0.000131243	0.00280511	0.660656
ENSG00000220305.1	chr6	HNRNPH1P1	-1.78651	-3.31449	-4.04831	6.92067920244572e-05	0.00181061	0.650665
ENSG00000105261.7	chr19	OVOL3	2.06491	-1.77688	3.91851	0.000115601	0.00256475	0.649895
ENSG00000136830.12	chr9	FAM129B	-1.02263	2.98425	-3.81631	0.000171554	0.00333587	0.648407
ENSG00000277452.1	chr1	RN7SL473P	-1.22835	-1.31213	-3.89019	0.000129072	0.00277201	0.646791
ENSG00000197989.14	chr1	SNHG12	-0.823338	3.22841	-3.81889	0.000169868	0.00332555	0.644274
ENSG00000067191.16	chr17	CACNB1	-0.871065	1.20445	-3.8155	0.000172081	0.00333645	0.64347
ENSG00000167861.16	chr17	HID1	1.0801	4.16703	3.83607	0.000159046	0.00318805	0.631264
ENSG00000211654.2	chr22	IGLV5-37	2.52512	-2.01637	3.92721	0.000111742	0.00252359	0.627534
ENSG00000242534.2	chr2	IGKV2D-28	3.26946	2.50021	3.80366	0.000180042	0.00344235	0.621511
ENSG00000274559.3	chr21	CU639417.1	1.12532	-1.76133	3.9075	0.000120671	0.00263371	0.619824
ENSG00000048462.11	chr16	TNFRSF17	1.34968	4.51819	3.84038	0.000156437	0.00316407	0.616945
ENSG00000276775.1	chr14	IGHV4-4	3.49003	1.14062	3.80429	0.000179604	0.00344235	0.604093
ENSG00000141447.18	chr18	OSBPL1A	-1.00883	1.15877	-3.80277	0.000180653	0.00344707	0.599921
ENSG00000119125.16	chr9	GDA	-2.7663	-2.07951	-3.92197	0.000114051	0.00254808	0.598704
ENSG00000233175.2	chr17	AC008105.1	-1.10444	0.271355	-3.81754	0.000170749	0.00332895	0.594947
ENSG00000102445.18	chr13	RUBCNL	-1.17175	7.02851	-3.85752	0.000146451	0.00301375	0.59026
ENSG00000166532.16	chr12	RIMKLB	-1.12315	4.05868	-3.82097	0.000168519	0.00331201	0.587861
ENSG00000179178.11	chr1	TMEM125	2.12308	-1.56188	3.88294	0.000132747	0.00282916	0.582651
ENSG00000260261.2	chr3	AC124944.3	-1.38176	0.969173	-3.79895	0.0001833	0.00348028	0.57862
ENSG00000136026.14	chr12	CKAP4	0.851369	7.56292	3.85417	0.000148353	0.00304956	0.578052
ENSG00000211895.5	chr14	IGHA1	1.77886	8.97779	3.84949	0.00015105	0.00308924	0.567918
ENSG00000108641.15	chr17	B9D1	0.846996	1.9378	3.78481	0.00019343	0.00359469	0.561624
ENSG00000156299.13	chr21	TIAM1	-0.994395	2.127	-3.78392	0.000194083	0.00360351	0.559309
ENSG00000285725.1	chr7	AC004967.2	-1.21752	-0.379403	-3.82356	0.000166856	0.0032956	0.559195
ENSG00000211974.3	chr14	IGHV2-70D	3.49916	-1.69039	3.88245	0.000133004	0.00282925	0.558016
ENSG00000215349.2	chr13	MRPL3P1	1.25473	-2.78234	3.96369	9.68401564098184e-05	0.00228169	0.556317
ENSG00000118985.16	chr5	ELL2	1.02719	6.31112	3.84526	0.000153533	0.00312732	0.552801
ENSG00000164877.19	chr7	MICALL2	-1.0812	0.796609	-3.78819	0.000190956	0.00357122	0.534868
ENSG00000272980.4	chr6	Z94721.2	-1.83825	-1.66268	-3.87036	0.000139371	0.00292402	0.526881
ENSG00000198794.12	chr15	SCAMP5	1.40589	3.21401	3.78262	0.000195045	0.00360743	0.520902
ENSG00000248774.1	chr4	AC097534.1	-0.96821	-0.677989	-3.81552	0.000172068	0.00333645	0.50331
ENSG00000125945.15	chr1	ZNF436	-0.826697	-1.16094	-3.8352	0.000159578	0.00318992	0.502244
ENSG00000149289.11	chr11	ZC3H12C	-1.09	-0.774355	-3.81735	0.000170868	0.00332895	0.497952
ENSG00000019144.19	chr11	PHLDB1	-1.09194	-0.0445953	-3.78926	0.000190185	0.00356398	0.481401
ENSG00000211677.2	chr22	IGLC2	2.52444	8.31025	3.82517	0.000165835	0.00328814	0.477687
ENSG00000285851.1	chr1	AL359762.3	-1.30006	-1.05828	-3.82184	0.000167959	0.00331201	0.475944
ENSG00000251301.6	chr12	LINC02384	1.21966	-0.288368	3.79397	0.000186809	0.00353026	0.475426
ENSG00000256625.1	chr12	AC092747.2	-1.50658	-2.12815	-3.88057	0.000133975	0.00284096	0.466638
ENSG00000162913.9	chr1	OBSCN-AS1	-1.29815	-0.233391	-3.78686	0.000191929	0.00357802	0.458144
ENSG00000211655.3	chr22	IGLV1-36	2.1209	0.415772	3.76662	0.000207231	0.00376435	0.443391
ENSG00000105246.6	chr19	EBI3	1.30497	3.10938	3.75796	0.000214131	0.00387223	0.443373
ENSG00000242732.4	chrX	RTL5	-2.03658	1.53485	-3.75036	0.000220357	0.00394585	0.442123
ENSG00000149972.11	chr11	CNTN5	2.37907	-4.46994	4.10919	5.41623561067445e-05	0.00151332	0.436193
ENSG00000198467.14	chr9	TPM2	-1.48329	1.94394	-3.74027	0.000228894	0.00405904	0.414891
ENSG00000199436.1	chr14	SNORD9	-1.32243	-2.22839	-3.86242	0.00014371	0.00299074	0.392863
ENSG00000266124.1	chr16	MIR5587	-1.9739	-3.34659	-3.95615	9.97563705249558e-05	0.00231787	0.3843
ENSG00000139117.14	chr12	CPNE8	-1.04917	0.659463	-3.74279	0.000226731	0.00402702	0.382568
ENSG00000092758.17	chr20	COL9A3	1.00315	4.38069	3.76822	0.000205986	0.00374512	0.376397
ENSG00000263220.1	chr17	AC015727.1	-1.75567	-1.69569	-3.82102	0.000168489	0.00331201	0.374329
ENSG00000014257.16	chr3	ACPP	-1.7133	2.7169	-3.72948	0.000238371	0.00416736	0.366492
ENSG00000121753.12	chr1	ADGRB2	-1.47971	2.03444	-3.72505	0.00024236	0.00422349	0.365131
ENSG00000224888.4	chr16	AC138028.2	-1.10816	-0.929415	-3.77728	0.000199035	0.00364739	0.357174
ENSG00000116652.6	chr1	DLEU2L	-1.09281	-0.259969	-3.7547	0.000216783	0.00390268	0.356205
ENSG00000226091.7	chr12	LINC00937	-2.12516	-1.87292	-3.8197	0.000169341	0.00332169	0.338582
ENSG00000229512.1	chr11	AC068580.1	-1.54943	-2.13487	-3.83406	0.00016028	0.00319371	0.329905
ENSG00000188856.6	chr8	RPSAP47	2.84552	2.01688	3.71021	0.000256211	0.00437034	0.316664
ENSG00000179869.15	chr7	ABCA13	-2.18686	-0.0267546	-3.73497	0.000233504	0.00410466	0.313735
ENSG00000226891.8	chr1	LINC01359	-1.61623	-2.34247	-3.83788	0.000157945	0.00317862	0.298134
ENSG00000262151.1	chr16	AC133065.1	-1.90486	0.208471	-3.7241	0.000243224	0.00423488	0.296566
ENSG00000255197.5	chr11	AC090559.1	-0.922458	1.44585	-3.70589	0.000260384	0.00440054	0.296376
ENSG00000188603.19	chr16	CLN3	-0.93663	0.982764	-3.70925	0.000257135	0.00437868	0.291932
ENSG00000211966.2	chr14	IGHV5-51	1.81429	3.60391	3.72278	0.00024443	0.00424419	0.289254
ENSG00000262488.1	chr16	AC133065.2	-1.95211	1.93251	-3.70045	0.000265725	0.00445714	0.284935
ENSG00000279700.1	chr12	AC131212.2	-1.84566	-1.57527	-3.78275	0.000194942	0.00360743	0.281744
ENSG00000124615.20	chr6	MOCS1	-2.37971	1.69545	-3.69538	0.000270794	0.00451059	0.266998
ENSG00000213801.4	chr19	ZNF321P	-0.929593	0.518142	-3.70659	0.000259698	0.00439623	0.26088
ENSG00000136052.9	chr12	SLC41A2	0.975988	2.19705	3.6931	0.000273103	0.00453995	0.259537
ENSG00000197134.12	chr19	ZNF257	-1.37244	2.04017	-3.69138	0.000274866	0.00455862	0.255273
ENSG00000243716.10	chr16	NPIPB5	-1.26466	0.583754	-3.70291	0.000263294	0.00443854	0.252955
ENSG00000269043.1	chr19	AC008554.2	-2.38051	-4.05393	-3.98562	8.88123649244372e-05	0.00214781	0.25232
ENSG00000276168.1	chr14	RN7SL1	0.879366	4.64928	3.73615	0.000232474	0.00410086	0.243516
ENSG00000009694.13	chrX	TENM1	-2.09183	-3.02374	-3.87373	0.00013757	0.00289586	0.241917
ENSG00000279330.1	chr16	AJ003147.3	-1.59066	-0.376035	-3.71781	0.000249026	0.00428771	0.233197
ENSG00000228812.7	chr20	LAMA5-AS1	1.8446	-3.02482	3.87014	0.000139488	0.00292402	0.231733
ENSG00000188227.13	chr19	ZNF793	-0.814934	2.98395	-3.6913	0.000274943	0.00455862	0.226998
ENSG00000090554.13	chr19	FLT3LG	-1.42537	-1.18185	-3.74279	0.000226734	0.00402702	0.221568
ENSG00000250802.7	chr5	ZBED3-AS1	-1.09055	-0.399774	-3.71294	0.000253612	0.00434071	0.216316
ENSG00000143994.14	chr2	ABHD1	-0.960871	-0.630029	-3.71936	0.000247586	0.00427022	0.214675
ENSG00000265451.1	chr2	AC012447.1	1.11276	-1.62674	3.75636	0.000215431	0.00389225	0.195978
ENSG00000131724.11	chrX	IL13RA1	-1.27334	3.96753	-3.70186	0.000264329	0.00444855	0.186363
ENSG00000271133.5	chr7	AC004130.1	-1.71952	0.0845473	-3.68818	0.000278154	0.00458703	0.177325
ENSG00000272625.1	chr18	AP000919.4	-1.32035	-1.10731	-3.72378	0.000243522	0.00423616	0.174737
ENSG00000244116.3	chr2	IGKV2-28	2.98853	0.872083	3.66773	0.000300098	0.00481288	0.156601
ENSG00000141258.13	chr17	SGSM2	-0.831054	6.12559	-3.72931	0.000238519	0.00416736	0.149639
ENSG00000100079.7	chr22	LGALS2	-1.92179	0.875425	-3.66461	0.00030359	0.00483527	0.146969
ENSG00000262619.1	chr13	LINC00621	-1.88538	-2.17142	-3.76577	0.000207905	0.00377319	0.126775
ENSG00000186529.16	chr19	CYP4F3	-1.92045	0.415384	-3.66468	0.000303508	0.00483527	0.125058
ENSG00000075275.16	chr22	CELSR1	-0.891223	5.67492	-3.71795	0.0002489	0.00428771	0.122697
ENSG00000243710.7	chr1	CFAP57	1.27178	-1.43267	3.72088	0.000246184	0.00425697	0.122069
ENSG00000105371.10	chr19	ICAM4	1.08295	0.205086	3.66471	0.000303471	0.00483527	0.112995
ENSG00000127366.5	chr7	TAS2R5	-1.38091	-1.26192	-3.70672	0.000259575	0.00439623	0.104349
ENSG00000205583.13	chr7	STAG3L1	-0.816382	1.10077	-3.64632	0.000324813	0.00505111	0.0979369
ENSG00000159339.13	chr1	PADI4	-1.12953	3.0724	-3.65347	0.000316359	0.0049673	0.0965632
ENSG00000130783.13	chr12	CCDC62	-0.81167	0.451655	-3.65464	0.000314994	0.00496319	0.0960558
ENSG00000272954.1	chr22	AP000553.2	-1.79764	-2.76029	-3.79763	0.000184226	0.00349457	0.0936606
ENSG00000211937.3	chr14	IGHV2-5	2.42577	3.19337	3.65353	0.000316282	0.0049673	0.0888108
ENSG00000122477.12	chr1	LRRC39	-1.35806	-0.705387	-3.67974	0.000287019	0.00467799	0.0883184
ENSG00000125384.7	chr14	PTGER2	-0.840711	2.65941	-3.64434	0.000327194	0.00507415	0.0881218
ENSG00000065485.20	chr3	PDIA5	0.841402	3.47853	3.65877	0.000310219	0.00491976	0.0846525
ENSG00000225187.1	chr2	AC073283.1	-1.09239	-1.04068	-3.69051	0.000275753	0.00456829	0.0843305
ENSG00000185527.12	chr17	AC139530.1	0.921358	1.04332	3.64025	0.000332171	0.00512766	0.0770691
ENSG00000272084.1	chr1	AL137127.1	-1.08847	-1.63706	-3.7151	0.000251573	0.00431681	0.0744441
ENSG00000256973.1	chr12	AC053513.1	-1.48277	-1.51179	-3.70716	0.000259151	0.00439623	0.0704999
ENSG00000251009.2	chr4	AC133961.1	1.50851	-3.01378	3.81039	0.000175476	0.00339574	0.0701346
ENSG00000101746.15	chr18	NOL4	3.24859	-2.98634	3.80614	0.000178344	0.00343404	0.0650291
ENSG00000278869.1	chr22	BX539320.1	-0.87177	0.742858	-3.63869	0.000334077	0.00514918	0.0607827
ENSG00000211665.3	chr22	IGLV3-16	1.73799	-1.19012	3.68826	0.000278072	0.00458703	0.0594692
ENSG00000146409.12	chr6	SLC18B1	-0.845709	4.22208	-3.6666	0.000301357	0.00482195	0.0435697
ENSG00000170954.11	chr19	ZNF415	-1.38381	1.88427	-3.62387	0.000352781	0.00534343	0.0387922
ENSG00000271178.1	chr16	IGHV3OR16-13	3.20432	-0.815795	3.66524	0.000302882	0.00483527	0.0341993
ENSG00000166068.13	chr15	SPRED1	1.40907	3.08225	3.63444	0.000339348	0.00520256	0.0333296
ENSG00000187608.9	chr1	ISG15	0.814977	3.95206	3.65581	0.000313636	0.00495545	0.0326278
ENSG00000244482.10	chr19	LILRA6	-1.43955	0.46376	-3.63249	0.000341795	0.00523212	0.0286089
ENSG00000224093.5	chr1	AL109613.1	-1.56069	-0.947769	-3.66768	0.000300156	0.00481288	0.0274866
ENSG00000196782.12	chr4	MAML3	-0.932797	1.88142	-3.6203	0.000357436	0.00538933	0.0274324
ENSG00000178404.9	chr17	CEP295NL	-1.77952	-2.59527	-3.75974	0.000212697	0.00384975	0.0245969
ENSG00000181074.4	chr11	OR52N4	-1.26367	-0.208057	-3.64296	0.000328872	0.00509626	0.0196237
ENSG00000186912.6	chrX	P2RY4	-1.67748	-3.00052	-3.79051	0.000189279	0.00355692	0.0190675
ENSG00000038427.16	chr5	VCAN	-1.11932	7.08042	-3.68895	0.000277364	0.00458368	0.000747657
ENSG00000196739.15	chr9	COL27A1	-2.16134	-2.18057	-3.72172	0.00024541	0.00424725	0.000438957
ENSG00000116748.21	chr1	AMPD1	2.17997	0.195363	3.62302	0.000353883	0.00535209	-0.0147097
ENSG00000272068.1	chr1	AL365181.2	2.04398	-3.12197	3.78728	0.000191621	0.00357758	-0.0184206
ENSG00000104921.15	chr19	FCER2	1.17555	6.8197	3.6826	0.000283988	0.00464362	-0.0198488
ENSG00000131778.19	chr1	CHD1L	-1.03246	-0.33792	-3.62945	0.000345629	0.00527048	-0.0304026
ENSG00000229152.2	chr13	ANKRD10-IT1	-1.09987	3.52658	-3.62184	0.000355423	0.00537134	-0.0417429
ENSG00000126822.17	chr14	PLEKHG3	-1.02223	1.44771	-3.59846	0.000387174	0.0057224	-0.043905
ENSG00000152315.5	chr14	KCNK13	-1.47507	-2.61077	-3.7351	0.000233387	0.00410466	-0.0466956
ENSG00000166603.5	chr18	MC4R	2.37014	-4.18634	3.88575	0.000131309	0.00280511	-0.0481773
ENSG00000114933.16	chr2	INO80D	-0.825561	1.85974	-3.5946	0.000392658	0.00576537	-0.0539252
ENSG00000138829.12	chr5	FBN2	-1.10712	1.09004	-3.59716	0.000389015	0.00573906	-0.055458
ENSG00000278897.1	chr19	AC020951.1	-1.67073	1.18559	-3.59609	0.000390535	0.00575049	-0.056299
ENSG00000223648.4	chr14	IGHV3-64	2.5185	-1.95012	3.68704	0.000279341	0.00459749	-0.0566249
ENSG00000248671.7	chr11	AP002495.1	-0.994367	-1.62975	-3.66873	0.000298989	0.00481086	-0.0577743
ENSG00000256660.6	chr12	CLEC12B	-2.11889	-2.62611	-3.73094	0.000237069	0.00415282	-0.0613299
ENSG00000196576.15	chr22	PLXNB2	-0.824312	6.81762	-3.66942	0.000298223	0.00480616	-0.0648438
ENSG00000250067.12	chr19	YJEFN3	-1.37932	0.184313	-3.60435	0.000378932	0.0056378	-0.0718428
ENSG00000139292.13	chr12	LGR5	-2.02067	-2.22726	-3.68959	0.000276696	0.0045764	-0.0980665
ENSG00000139351.15	chr12	SYCP3	-1.59775	-2.14612	-3.68403	0.000282484	0.00462277	-0.0989929
ENSG00000267274.1	chr19	AC008770.3	-1.11206	-0.651121	-3.61364	0.00036627	0.00547774	-0.102656
ENSG00000105672.14	chr19	ETV2	0.842962	-0.825182	3.61763	0.000360948	0.00542502	-0.106939
ENSG00000167123.19	chr9	CERCAM	1.25037	2.0859	3.5751	0.00042154	0.00607433	-0.11788
ENSG00000261556.9	chr16	SMG1P7	-1.22366	2.37762	-3.57403	0.000423179	0.0060849	-0.128224
ENSG00000248971.2	chr4	KRT8P46	-1.15893	0.0644309	-3.58705	0.000403623	0.00586651	-0.130681
ENSG00000178038.17	chr3	ALS2CL	-1.46449	0.792845	-3.57551	0.000420913	0.00607399	-0.131426
ENSG00000259120.3	chr17	SMIM6	-1.56946	-0.211081	-3.59161	0.00039697	0.00581175	-0.134181
ENSG00000253476.1	chr8	AC091185.1	-1.44474	-1.89648	-3.65509	0.000314471	0.00496319	-0.13786
ENSG00000188404.9	chr1	SELL	-1.3115	8.46109	-3.64644	0.000324677	0.00505111	-0.140744
ENSG00000221869.4	chr8	CEBPD	-1.15811	4.82811	-3.62663	0.000349229	0.00529945	-0.142475
ENSG00000204580.13	chr6	DDR1	-0.835778	3.92789	-3.6021	0.00038206	0.00566343	-0.143795
ENSG00000242588.6	chr7	AC108010.1	-1.32955	1.04639	-3.56622	0.000435339	0.00621538	-0.151939
ENSG00000176697.19	chr11	BDNF	2.67087	-4.32129	3.85932	0.000145442	0.00300814	-0.156123
ENSG00000216809.1	chr6	AL589993.1	-1.66955	-2.86134	-3.71399	0.000252613	0.00432728	-0.157089
ENSG00000132688.11	chr1	NES	2.3899	-3.68284	3.78616	0.000192434	0.00357949	-0.162226
ENSG00000173114.13	chr7	LRRN3	-2.99029	-2.72711	-3.69659	0.000269577	0.00449927	-0.175909
ENSG00000211941.3	chr14	IGHV3-11	2.10716	3.21851	3.57243	0.000425651	0.00610737	-0.178494
ENSG00000140287.11	chr15	HDC	-1.81542	-2.01277	-3.6462	0.000324956	0.00505111	-0.18173
ENSG00000196358.11	chr9	NTNG2	-0.851217	1.76295	-3.55059	0.000460677	0.00646263	-0.191629
ENSG00000105290.12	chr19	APLP1	2.08942	-2.28808	3.65855	0.000310476	0.00491976	-0.195095
ENSG00000279328.1	chr3	AC073439.1	-1.49447	-3.08535	-3.7166	0.000250163	0.00429995	-0.199359
ENSG00000279801.1	chr17	AC111170.3	-1.50969	-1.48933	-3.6112	0.00036956	0.0055109	-0.201939
ENSG00000267959.3	chr19	MIR3188	-1.44976	-3.01631	-3.7088	0.000257571	0.00438067	-0.204772
ENSG00000272732.1	chr7	AC004982.1	-1.59021	-0.844391	-3.58469	0.000407102	0.00590004	-0.204803
ENSG00000154447.15	chr4	SH3RF1	-1.354	2.38059	-3.54787	0.000465228	0.00650834	-0.211343
ENSG00000239998.6	chr19	LILRA2	-0.80683	2.87847	-3.55433	0.000454487	0.00640551	-0.213852
ENSG00000224373.3	chr14	IGHV4-59	2.33617	4.53212	3.59787	0.000388005	0.00573048	-0.214655
ENSG00000130751.9	chr19	NPAS1	0.901873	-0.359472	3.56584	0.000435939	0.00621853	-0.220464
ENSG00000211673.2	chr22	IGLV3-1	2.51492	5.45444	3.61438	0.000365281	0.00546768	-0.220807
ENSG00000259318.1	chr14	AL356801.1	-1.69526	-1.82065	-3.61885	0.000359342	0.00540624	-0.227679
ENSG00000077238.14	chr16	IL4R	-1.09554	6.85556	-3.62095	0.000356591	0.00538412	-0.229406
ENSG00000275227.1	chr3	RF02271	-1.35885	-1.49812	-3.60128	0.000383212	0.00567633	-0.231248
ENSG00000229228.1	chr1	LINC00582	2.04581	-1.29062	3.59076	0.0003982	0.00581499	-0.234959
ENSG00000073910.21	chr13	FRY	-1.25686	2.25943	-3.53833	0.000481509	0.00667125	-0.237708
ENSG00000169962.5	chr1	TAS1R3	1.38403	6.3776	3.61689	0.000361934	0.005429	-0.238321
ENSG00000178078.11	chr19	STAP2	0.974983	-0.28539	3.55401	0.000455015	0.00640551	-0.250207
ENSG00000279554.1	chr16	AC130448.2	-1.40877	-0.918534	-3.56877	0.000431342	0.00617144	-0.257904
ENSG00000170819.4	chr3	BFSP2	1.27687	0.120632	3.54296	0.000473529	0.00658333	-0.259005
ENSG00000262370.5	chr16	AC108134.3	-1.93771	-2.61756	-3.65622	0.000313163	0.00495186	-0.263209
ENSG00000235499.1	chr2	AC073046.1	-1.01045	-0.0720713	-3.54221	0.000474819	0.00659284	-0.271799
ENSG00000107551.21	chr10	RASSF4	-0.808592	3.43513	-3.54762	0.000465647	0.00650968	-0.276387
ENSG00000226137.5	chr17	BAIAP2-DT	-1.002	2.70594	-3.53019	0.000495814	0.0068191	-0.28121
ENSG00000213169.3	chr3	AC069218.1	0.818108	-1.33309	3.5746	0.000422302	0.00607662	-0.285996
ENSG00000159899.14	chr9	NPR2	-1.04906	1.35401	-3.51939	0.000515434	0.00699103	-0.28956
ENSG00000255423.1	chr3	EBLN2	-0.836596	1.21011	-3.51924	0.000515695	0.00699103	-0.291976
ENSG00000274272.1	chr7	AC069281.2	-1.21437	0.602493	-3.52463	0.000505822	0.00692241	-0.292204
ENSG00000272316.1	chr6	AL021368.2	-0.86088	2.46121	-3.52175	0.000511082	0.00696149	-0.296691
ENSG00000254389.3	chr8	RHPN1-AS1	-1.35419	-1.45547	-3.57593	0.000420266	0.006069	-0.297341
ENSG00000226435.10	chr3	ANKRD18DP	-2.1119	-4.12682	-3.77984	0.000197109	0.00362958	-0.299031
ENSG00000103196.12	chr16	CRISPLD2	-1.06067	2.01921	-3.51588	0.000521946	0.00705205	-0.30238
ENSG00000197599.12	chr16	CCDC154	-1.55392	0.665539	-3.51944	0.000515325	0.00699103	-0.305489
ENSG00000007516.13	chr16	BAIAP3	-1.43436	5.73648	-3.5923	0.000395972	0.00580141	-0.305799
ENSG00000259652.1	chr15	AC090181.1	-1.61141	-0.917259	-3.55195	0.000458414	0.00644435	-0.30615
ENSG00000269867.1	chr19	AC010326.3	-1.5752	-3.03476	-3.67132	0.000296132	0.00478394	-0.308287
ENSG00000225193.5	chr15	RPS12P26	-1.53849	-0.897787	-3.54946	0.000462564	0.00648459	-0.311486
ENSG00000254996.5	chr5	ANKHD1-EIF4EBP3	-0.896402	1.022	-3.51338	0.000526644	0.00709174	-0.31346
ENSG00000261071.1	chr6	AL441883.1	0.968997	-1.26622	3.56159	0.000442708	0.00628938	-0.315053
ENSG00000079482.13	chrX	OPHN1	-1.38865	-2.11158	-3.60316	0.000380587	0.00564991	-0.317117
ENSG00000244055.1	chr7	AC007566.1	-0.973785	0.536988	-3.51656	0.000520679	0.00703965	-0.318791
ENSG00000178440.6	chr10	LINC00843	-1.08123	0.984941	-3.50611	0.000540525	0.00721308	-0.336263
ENSG00000254780.1	chr11	AC023232.1	1.40864	-1.80997	3.57479	0.000422018	0.00607662	-0.3488
ENSG00000235217.6	chr20	TSPY26P	-0.993964	0.820426	-3.50309	0.000546397	0.00726838	-0.349623
ENSG00000244720.1	chr3	AC055748.1	-2.08924	-2.67821	-3.62734	0.00034832	0.00529178	-0.352541
ENSG00000148848.14	chr10	ADAM12	-1.36726	-1.8987	-3.57531	0.000421228	0.00607419	-0.36044
ENSG00000251922.1	chr10	RF00397	-1.19353	-0.689909	-3.52537	0.000504477	0.0069134	-0.362763
ENSG00000224650.2	chr14	IGHV3-74	3.41558	3.47812	3.52197	0.000510683	0.00696149	-0.362891
ENSG00000168491.10	chr4	CCDC110	1.3211	-0.885617	3.53005	0.000496064	0.0068191	-0.365952
ENSG00000174233.11	chr12	ADCY6	-1.70575	-0.0160987	-3.50861	0.000535719	0.00718225	-0.367456
ENSG00000283416.1	chr16	MIR1910	-1.78167	-2.93224	-3.63758	0.000335442	0.00516233	-0.375822
ENSG00000240382.3	chr2	IGKV1-17	3.48629	3.27452	3.5083	0.000536323	0.00718366	-0.389207
ENSG00000266844.1	chr18	AC093330.1	-1.85119	0.47053	-3.49217	0.000568122	0.00747107	-0.393815
ENSG00000068137.15	chr17	PLEKHH3	1.03617	1.72631	3.48371	0.000585499	0.00765404	-0.397939
ENSG00000208772.1	chr2	SNORD94	-0.967659	-0.491109	-3.50691	0.000538985	0.00720973	-0.401142
ENSG00000286230.1	chr19	AC010327.6	-1.24014	-1.79777	-3.55436	0.000454436	0.00640551	-0.403524
ENSG00000240710.1	chr1	AL512306.3	-1.48306	-0.423585	-3.5	0.000552476	0.00733177	-0.416538
ENSG00000101311.15	chr20	FERMT1	-1.91199	-3.84362	-3.70262	0.000263584	0.00443972	-0.417432
ENSG00000257246.1	chr12	PHBP19	-1.626	-3.07517	-3.62939	0.000345708	0.00527048	-0.426949
ENSG00000142303.14	chr19	ADAMTS10	-1.63191	-1.04892	-3.51062	0.000531885	0.00714321	-0.436408
ENSG00000135540.11	chr6	NHSL1	-1.20058	-1.3966	-3.51813	0.000517767	0.00700969	-0.452292
ENSG00000133246.12	chr19	PRAM1	-0.89563	3.17296	-3.48486	0.000583113	0.0076278	-0.455567
ENSG00000232788.1	chr2	ITGA6-AS1	0.842876	-0.792843	3.49364	0.000565159	0.00744612	-0.4618
ENSG00000231265.1	chr20	TRERNA1	1.5391	-2.76223	3.5909	0.000397999	0.00581499	-0.465355
ENSG00000275491.1	chr20	LINC01730	-1.75104	-2.78411	-3.5923	0.000395976	0.00580141	-0.465844
ENSG00000278206.1	chr6	AL031320.2	-1.33001	-2.41316	-3.56623	0.000435327	0.00621538	-0.467752
ENSG00000248905.8	chr15	FMN1	-1.33523	-1.79528	-3.52995	0.000496242	0.0068191	-0.470311
ENSG00000153885.14	chr19	KCTD15	-1.57558	1.92098	-3.45892	0.000639345	0.00817234	-0.476212
ENSG00000224220.1	chr2	AC104699.1	1.10855	3.22547	3.4786	0.000596233	0.00774412	-0.479587
ENSG00000280381.1	chr12	AC026362.2	-1.31222	-0.799363	-3.48579	0.000581186	0.00761004	-0.484607
ENSG00000260060.1	chr16	AC009088.1	-1.43813	-1.49217	-3.50854	0.000535861	0.00718225	-0.490205
ENSG00000278416.1	chr7	PMS2P2	-2.01196	-2.95698	-3.59473	0.000392474	0.00576537	-0.493188
ENSG00000187796.14	chr9	CARD9	-0.964904	1.45823	-3.44865	0.000662959	0.00840442	-0.50352
ENSG00000270069.1	chrX	MIR222HG	-1.4726	0.226327	-3.45588	0.000646247	0.00824487	-0.510026
ENSG00000269825.1	chr19	AC022150.4	-0.912285	0.765933	-3.44849	0.000663342	0.00840442	-0.513557
ENSG00000235072.2	chr2	AC012074.1	-0.872668	-0.681382	-3.47172	0.000610996	0.00787997	-0.515403
ENSG00000169403.12	chr1	PTAFR	-0.928892	4.55203	-3.50587	0.000540998	0.00721308	-0.51882
ENSG00000160883.11	chr5	HK3	-0.833134	4.31356	-3.49868	0.000555072	0.00734686	-0.519825
ENSG00000253047.1	chr1	RF00561	-1.31243	-2.24138	-3.53553	0.000486384	0.00672693	-0.521567
ENSG00000230069.3	chr4	LRRC37A15P	-1.39521	-2.50121	-3.5509	0.000460159	0.00646263	-0.523735
ENSG00000229955.1	chr22	Z98749.1	-1.56657	-2.44105	-3.54673	0.000467139	0.00652349	-0.524505
ENSG00000080947.14	chr1	CROCCP3	-1.30033	2.30832	-3.44469	0.000672298	0.00848713	-0.530518
ENSG00000180316.12	chr6	PNPLA1	-1.23812	-1.84236	-3.50562	0.000541474	0.00721308	-0.543201
ENSG00000185046.18	chr12	ANKS1B	-2.00304	-3.69222	-3.63729	0.00033581	0.00516357	-0.544385
ENSG00000123870.10	chr19	ZNF137P	-0.863722	2.02087	-3.43683	0.000691175	0.00863218	-0.545699
ENSG00000225873.4	chr3	C3orf86	-1.53101	-2.56127	-3.54405	0.000471681	0.0065642	-0.552278
ENSG00000240694.9	chr8	PNMA2	3.05028	-1.40229	3.48125	0.000590652	0.00769644	-0.555253
ENSG00000285972.1	chr10	CERNA2	-2.33198	1.64376	-3.4309	0.000705753	0.00878027	-0.55763
ENSG00000166833.21	chr11	NAV2	-1.97915	-0.261522	-3.44447	0.000672819	0.00848713	-0.566256
ENSG00000233912.1	chr3	AC026202.2	1.28475	-1.05929	3.46466	0.000626469	0.00802812	-0.566437
ENSG00000233154.5	chr1	LINC01762	-1.53379	-3.32779	-3.59325	0.000394603	0.00578972	-0.573548
ENSG00000270277.1	chr2	AC009948.2	-1.05853	-0.246306	-3.43759	0.000689337	0.00862611	-0.585097
ENSG00000007402.11	chr3	CACNA2D2	-0.891674	0.0857387	-3.43078	0.000706048	0.00878027	-0.588641
ENSG00000158825.6	chr1	CDA	-0.903087	1.83456	-3.42008	0.000733091	0.00901008	-0.592656
ENSG00000242193.11	chr1	CRYZL2P	-1.10832	-1.19349	-3.45824	0.000640886	0.00818684	-0.597028
ENSG00000103313.12	chr16	MEFV	-1.08899	2.26795	-3.42214	0.000727817	0.00896491	-0.59811
ENSG00000177173.5	chr1	NAP1L4P1	-1.26726	-0.499682	-3.43721	0.00069026	0.00862611	-0.60085
ENSG00000261534.1	chr9	AL596244.1	-1.14648	2.07756	-3.41767	0.000739294	0.00904255	-0.605445
ENSG00000281195.1	chr2	AC007878.1	-1.1159	0.428417	-3.41933	0.000735009	0.00901629	-0.608748
ENSG00000167578.18	chr19	RAB4B	-1.13123	1.09658	-3.41356	0.000750025	0.00913498	-0.610512
ENSG00000244490.1	chr7	RWDD4P1	1.26163	-2.9822	3.54844	0.00046426	0.00649931	-0.618001
ENSG00000215302.8	chr15	AC127502.1	-0.936307	0.78229	-3.41175	0.000754806	0.00917656	-0.621151
ENSG00000214787.10	chr11	MS4A4E	-1.5138	-0.184886	-3.42331	0.000724826	0.00894159	-0.622652
ENSG00000285444.1	chr13	AL162377.3	-1.40168	-3.10521	-3.55416	0.000454764	0.00640551	-0.62735
ENSG00000273373.1	chr1	AL355488.1	-1.07539	1.66846	-3.40622	0.000769544	0.00928636	-0.631981
ENSG00000236081.1	chr7	ELFN1-AS1	2.34572	-3.18483	3.55793	0.000448612	0.00634641	-0.633685
ENSG00000223350.2	chr22	IGLV9-49	1.75402	0.35531	3.41101	0.000756745	0.00919447	-0.63527
ENSG00000211976.2	chr14	IGHV3-73	3.08812	1.06735	3.40519	0.000772321	0.0092886	-0.635545
ENSG00000259332.3	chr15	ST20-MTHFS	-0.914618	-1.09039	-3.44	0.000683503	0.00856825	-0.637834
ENSG00000179241.13	chr11	LDLRAD3	-1.00502	-0.240525	-3.41772	0.000739169	0.00904255	-0.641375
ENSG00000279873.2	chr2	LINC01126	-1.0902	0.60632	-3.40615	0.000769728	0.00928636	-0.641737
ENSG00000251485.1	chr2	AC068134.3	-1.30724	-2.3631	-3.49587	0.000560663	0.00740627	-0.646331
ENSG00000087903.13	chr19	RFX2	-0.848098	1.58844	-3.40113	0.000783341	0.0093931	-0.646414
ENSG00000249119.1	chr5	MTND6P4	-1.07877	-1.71827	-3.46028	0.000636269	0.00814336	-0.649933
ENSG00000228808.1	chr13	HMGB3P4	-1.51696	-3.14378	-3.54531	0.000469542	0.00654597	-0.657584
ENSG00000214189.9	chr19	ZNF788P	-1.23046	-2.49431	-3.49894	0.00055456	0.00734491	-0.659467
ENSG00000167524.14	chr17	RSKR	-1.27013	2.14475	-3.40037	0.000785442	0.00940709	-0.659961
ENSG00000184451.5	chr17	CCR10	1.15442	2.25627	3.39674	0.00079545	0.00951111	-0.674938
ENSG00000241962.9	chr2	AC079447.1	-1.18037	-2.37776	-3.48345	0.000586034	0.00765607	-0.681324
ENSG00000281162.2	chr2	LINC01127	-1.71481	-2.76698	-3.50549	0.000541742	0.00721308	-0.68898
ENSG00000261286.1	chr16	ATP2C2-AS1	-1.38999	-2.14844	-3.4673	0.000620632	0.00797552	-0.689228
ENSG00000281183.1	chr15	NPTN-IT1	-1.13892	-0.307929	-3.40199	0.000780995	0.00937055	-0.689423
ENSG00000213139.8	chr3	CRYGS	-0.874266	1.39648	-3.38378	0.000832191	0.00981813	-0.697
ENSG00000226281.3	chr6	AL031123.1	-1.505	-3.58965	-3.56478	0.000437622	0.00623473	-0.701806
ENSG00000258230.2	chr12	AC063950.1	-1.69082	-1.49206	-3.42992	0.000708197	0.00879571	-0.705678
ENSG00000251667.1	chr5	BRCC3P1	-1.33812	-2.02259	-3.45102	0.000657439	0.00835063	-0.714634
ENSG00000164099.3	chr4	PRSS12	-2.43911	-4.5939	-3.65991	0.000308911	0.00490387	-0.71972
ENSG00000259660.2	chr15	DNM1P47	-1.12041	-0.613647	-3.3922	0.000808131	0.00961396	-0.734402
ENSG00000254815.5	chr11	AP006284.1	-2.05207	-1.75662	-3.43051	0.000706718	0.00878275	-0.734791
ENSG00000224041.3	chr2	IGKV3D-15	2.48939	1.96427	3.37359	0.000862159	0.0100336	-0.735167
ENSG00000272564.1	chr2	AC012511.1	1.09553	-1.59423	3.42187	0.000728497	0.00896491	-0.738843
ENSG00000129673.9	chr17	AANAT	1.61578	-3.22659	3.51948	0.000515252	0.00699103	-0.739284
ENSG00000211945.2	chr14	IGHV1-18	1.85546	3.52127	3.40342	0.0007771	0.00933493	-0.74248
ENSG00000187824.8	chr17	TMEM220	-1.0411	1.90774	-3.37021	0.000872337	0.0101054	-0.74384
ENSG00000268670.1	chr19	AC016586.1	-1.51962	-1.77425	-3.41992	0.000733509	0.00901008	-0.765276
ENSG00000170439.7	chr12	METTL7B	1.43387	-1.31041	3.40068	0.000784584	0.00940241	-0.766287
ENSG00000137177.20	chr6	KIF13A	-0.875479	4.26382	-3.41933	0.000735021	0.00901629	-0.768893
ENSG00000276148.1	chr12	AC084824.5	-0.884891	-0.737058	-3.38046	0.000841846	0.00986561	-0.774998
ENSG00000211965.4	chr14	IGHV3-49	2.06374	1.83796	3.35894	0.000907042	0.0103663	-0.775768
ENSG00000180573.9	chr6	HIST1H2AC	0.953735	5.90978	3.44969	0.000660538	0.00837943	-0.779223
ENSG00000231327.1	chr2	LINC01816	0.861145	-1.79435	3.41316	0.000751087	0.00913687	-0.785733
ENSG00000203914.4	chr1	HSP90B3P	0.836075	-1.20624	3.38917	0.000816704	0.00968364	-0.787815
ENSG00000269964.3	chr6	MEI4	-2.01734	-3.60804	-3.53114	0.000494133	0.00680404	-0.788844
ENSG00000243466.1	chr2	IGKV1-5	2.83569	5.44955	3.44131	0.000680358	0.00854879	-0.789019
ENSG00000258311.5	chr12	AC009779.3	-0.993216	-0.351793	-3.36502	0.000888165	0.0102357	-0.795471
ENSG00000183691.4	chr17	NOG	-1.70081	-2.69784	-3.45926	0.000638566	0.00816756	-0.795919
ENSG00000228315.12	chr22	GUSBP11	-1.19939	3.2559	-3.37739	0.000850861	0.00993483	-0.798403
ENSG00000279500.1	chr12	AC108704.2	-1.21768	-0.430971	-3.3648	0.000888841	0.0102377	-0.800169
ENSG00000254363.6	chr5	AC011379.2	-1.32025	-0.564376	-3.36616	0.000884645	0.0102193	-0.803795
ENSG00000163536.12	chr3	SERPINI1	0.875726	2.60597	3.35951	0.000905256	0.0103557	-0.804723
ENSG00000261652.2	chr15	C15orf65	0.83352	-0.360478	3.36012	0.000903358	0.0103457	-0.809578
ENSG00000134780.10	chr11	DAGLA	-1.22306	-1.08739	-3.37727	0.000851205	0.00993483	-0.809909
ENSG00000005243.10	chr17	COPZ2	1.1004	0.051245	3.35316	0.000925332	0.0105137	-0.811173
ENSG00000020181.17	chr8	ADGRA2	-1.05212	0.00950015	-3.35192	0.000929325	0.0105412	-0.81626
ENSG00000166743.9	chr16	ACSM1	-1.0475	-1.05946	-3.37404	0.000860811	0.0100237	-0.816429
ENSG00000272033.1	chr1	AL136984.1	-1.4503	-1.486	-3.38737	0.000821841	0.00972737	-0.81984
ENSG00000213204.8	chr6	AL049697.1	-1.52118	-1.43447	-3.38358	0.000832748	0.00981813	-0.824742
ENSG00000167207.13	chr16	NOD2	-1.0598	2.75233	-3.3556	0.000917582	0.0104433	-0.825742
ENSG00000166676.16	chr16	TVP23A	-1.39831	-0.549041	-3.35636	0.000915172	0.0104277	-0.830068
ENSG00000144749.13	chr3	LRIG1	-0.953894	4.34848	-3.40259	0.000779375	0.00935668	-0.830368
ENSG00000264290.1	chr17	AC104564.3	-1.60044	0.433175	-3.34151	0.000963282	0.0108047	-0.832076
ENSG00000236337.1	chrX	FMR1-IT1	-1.26768	-0.707041	-3.35872	0.000907723	0.0103663	-0.833005
ENSG00000235760.4	chr2	AC138655.1	-1.477	-3.05479	-3.46659	0.000622215	0.00798886	-0.839575
ENSG00000256843.1	chr12	AC023157.2	-1.55633	-3.24452	-3.48017	0.00059292	0.00770895	-0.841071
ENSG00000211661.2	chr22	IGLV3-22	2.10348	-4.1256	3.55697	0.000450177	0.00635961	-0.843517
ENSG00000267765.1	chr17	AC100793.3	-1.50173	-3.19095	-3.4741	0.000605843	0.00782371	-0.846002
ENSG00000264057.1	chr17	AC103810.1	-1.61778	-0.885901	-3.35786	0.00091044	0.0103914	-0.847386
ENSG00000267474.1	chr19	AC008569.2	-1.224	-1.86637	-3.39177	0.000809338	0.00961396	-0.851159
ENSG00000211968.3	chr14	IGHV1-58	2.06859	-0.610581	3.34892	0.000938975	0.0106029	-0.85413
ENSG00000228434.1	chr7	AC004951.1	-0.813056	0.16282	-3.33627	0.000980801	0.0109423	-0.854844
ENSG00000141576.16	chr17	RNF157	1.18955	1.48636	3.32981	0.00100283	0.0110939	-0.856008
ENSG00000202358.1	chr4	RNU6-652P	-1.67652	-2.878	-3.44355	0.000675007	0.00850939	-0.866297
ENSG00000255026.1	chr11	AC136475.3	-2.35356	1.7982	-3.32532	0.00101842	0.0112172	-0.874227
ENSG00000106328.9	chr7	FSCN3	-1.59157	-2.58478	-3.42027	0.000732607	0.00900999	-0.877363
ENSG00000143382.14	chr1	ADAMTSL4	-1.02513	1.93472	-3.3251	0.00101917	0.0112192	-0.878392
ENSG00000115902.11	chr2	SLC1A4	0.844437	5.83675	3.41785	0.000738839	0.00904255	-0.879223
ENSG00000175040.6	chr3	CHST2	1.4255	6.17467	3.4192	0.000735357	0.00901629	-0.883612
ENSG00000259984.1	chr1	AL928711.1	-1.34127	-1.80737	-3.37571	0.000855849	0.00997171	-0.886432
ENSG00000183682.8	chr1	BMP8A	1.62465	-0.36532	3.33131	0.000997676	0.0110551	-0.889785
ENSG00000158062.20	chr1	UBXN11	-0.899891	5.24299	-3.4054	0.000771764	0.0092886	-0.892989
ENSG00000126790.12	chr14	L3HYPDH	-1.11115	2.88431	-3.33567	0.000982848	0.010946	-0.895435
ENSG00000170608.3	chr19	FOXA3	-2.04149	-0.546687	-3.33152	0.000996945	0.0110531	-0.898418
ENSG00000275734.2	chr16	AC010538.1	-0.923014	-1.47589	-3.35541	0.000918177	0.0104442	-0.904251
ENSG00000244063.1	chr2	AC104653.2	-1.2251	-1.34011	-3.34976	0.000936272	0.0105902	-0.906338
ENSG00000074660.16	chr17	SCARF1	-0.880401	0.153268	-3.31752	0.001046	0.0113991	-0.907795
ENSG00000104093.13	chr15	DMXL2	-0.922847	3.93888	-3.36175	0.000898262	0.0103049	-0.915427
ENSG00000237298.9	chr2	TTN-AS1	-0.973079	3.61175	-3.35047	0.000933991	0.0105786	-0.915761
ENSG00000237200.1	chr1	ZBTB40-IT1	-1.23137	-1.87955	-3.36523	0.000887501	0.010234	-0.922456
ENSG00000269937.1	chr16	AC093525.7	-1.45809	-1.30385	-3.34024	0.000967495	0.0108372	-0.928501
ENSG00000183723.12	chr16	CMTM4	-0.899624	-0.118102	-3.3107	0.00107068	0.0115837	-0.936235
ENSG00000265982.1	chr17	AC103810.3	-1.03496	0.845466	-3.30139	0.0011053	0.0118944	-0.93853
ENSG00000005379.17	chr17	TSPOAP1	-1.09852	3.4947	-3.33783	0.000975565	0.0108998	-0.942688
ENSG00000261582.1	chr20	AL121753.1	-0.997396	-1.25147	-3.33249	0.000993642	0.0110225	-0.944644
ENSG00000218358.2	chr6	RAET1K	-1.63372	-2.58712	-3.39305	0.00080575	0.00960463	-0.946937
ENSG00000207525.1	chr16	RF00019	-1.22388	-1.89947	-3.35672	0.000914031	0.0104206	-0.947063
ENSG00000136869.15	chr9	TLR4	-1.01961	4.75708	-3.37706	0.000851835	0.00993643	-0.948403
ENSG00000211956.2	chr14	IGHV4-34	2.75569	3.93232	3.35039	0.000934247	0.0105786	-0.949968
ENSG00000177425.11	chr12	PAWR	-0.802199	5.36334	-3.3876	0.000821189	0.00972536	-0.95605
ENSG00000284670.1	chr16	AC092128.1	1.43044	-1.49904	3.33469	0.000986148	0.0109696	-0.961514
ENSG00000274191.1	chr12	AC026333.4	-1.3037	-2.07435	-3.35024	0.000934723	0.0105786	-0.985223
ENSG00000155158.20	chr9	TTC39B	-1.00807	1.18022	-3.28409	0.00117233	0.012326	-0.986328
ENSG00000166343.10	chr10	MSS51	-0.877441	1.4684	-3.28426	0.00117167	0.0123255	-0.987913
ENSG00000224307.1	chr9	AL161785.1	-1.37947	-1.59589	-3.3278	0.00100976	0.0111583	-0.989325
ENSG00000126759.13	chrX	CFP	-0.804218	1.41011	-3.28345	0.00117487	0.0123463	-0.989556
ENSG00000252421.1	chr12	RNU6-1069P	-1.6189	-3.10628	-3.40814	0.000764401	0.00924302	-0.994057
ENSG00000242970.2	chr8	AC068522.1	-1.36867	-2.88422	-3.39168	0.000809614	0.00961396	-0.997276
ENSG00000229325.1	chr3	ACAP2-IT1	-1.03313	0.084173	-3.28446	0.00117088	0.0123236	-1.002
ENSG00000274008.1	chr10	RF00017	-1.56845	-1.40061	-3.31551	0.00105322	0.0114565	-1.00295
ENSG00000258545.5	chrX	RHOXF1-AS1	-1.37068	-0.595149	-3.29113	0.00114462	0.0121744	-1.0113
ENSG00000151136.15	chr12	BTBD11	-0.975783	0.667194	-3.27257	0.00121905	0.0126469	-1.02215
ENSG00000279066.1	chr17	HEXD-IT1	-1.24532	-0.553525	-3.28497	0.00116883	0.0123085	-1.02588
ENSG00000211935.3	chr14	IGHV1-3	3.00938	2.33233	3.28036	0.00118729	0.0124184	-1.02601
ENSG00000213694.5	chr9	S1PR3	-1.18305	0.633423	-3.27078	0.00122649	0.0126966	-1.02767
ENSG00000197766.7	chr19	CFD	-0.871899	2.80576	-3.28665	0.00116218	0.0122705	-1.03681
ENSG00000239951.1	chr2	IGKV3-20	2.75223	6.49249	3.37053	0.000871348	0.0101054	-1.04354
ENSG00000113269.14	chr5	RNF130	-0.833899	5.37512	-3.35954	0.000905168	0.0103557	-1.04514
ENSG00000188897.9	chr16	AC099489.1	-1.26652	0.625775	-3.26445	0.00125301	0.0128973	-1.04549
ENSG00000211951.2	chr14	IGHV2-26	2.31046	1.25789	3.2634	0.0012575	0.0129156	-1.04569
ENSG00000198734.10	chr1	F5	-1.03389	2.61036	-3.2782	0.00119603	0.0124645	-1.04841
ENSG00000279880.1	chr17	AC134407.3	-1.38752	-1.00217	-3.27231	0.00122015	0.0126469	-1.08605
ENSG00000154330.13	chr9	PGM5	-2.51358	-0.0501146	-3.25517	0.00129294	0.0131255	-1.08677
ENSG00000232124.2	chr21	AP001057.1	1.12364	-0.866405	3.2684	0.00123641	0.0127731	-1.08777
ENSG00000106018.14	chr7	VIPR2	-1.54751	-3.32161	-3.38459	0.000829829	0.0098104	-1.08952
ENSG00000137965.11	chr1	IFI44	-1.15147	3.01283	-3.27444	0.00121138	0.0125919	-1.08962
ENSG00000238286.1	chr13	SLC35E1P1	-1.39656	-2.83599	-3.35097	0.000932353	0.0105696	-1.09045
ENSG00000219682.4	chr6	AL133268.1	-0.830846	-1.93015	-3.30002	0.00111048	0.0119373	-1.09724
ENSG00000244671.3	chr22	RN7SL280P	-1.55174	-3.18274	-3.36752	0.00088049	0.0101881	-1.10653
ENSG00000196074.13	chr20	SYCP2	-1.30606	0.839833	-3.24177	0.00135263	0.0135162	-1.10677
ENSG00000229953.1	chr1	AL590666.2	1.66192	-2.00903	3.29922	0.00111348	0.0119536	-1.10826
ENSG00000198574.6	chr1	SH2D1B	-1.32409	-0.465297	-3.25189	0.0013073	0.0132273	-1.1112
ENSG00000259820.1	chr8	AC083843.3	-0.985313	1.69602	-3.24258	0.00134896	0.0134929	-1.11194
ENSG00000177688.6	chr6	SUMO4	-1.31745	-2.2929	-3.31115	0.00106904	0.0115722	-1.11268
ENSG00000273568.1	chr12	AC131009.3	-1.18045	-0.677278	-3.25419	0.0012972	0.0131516	-1.11512
ENSG00000092295.12	chr14	TGM1	-1.18948	-0.783621	-3.2562	0.00128843	0.0131104	-1.11549
ENSG00000165801.10	chr14	ARHGEF40	-0.829184	3.05362	-3.26654	0.00124422	0.012834	-1.11667
ENSG00000265479.6	chr7	DTX2P1-UPK3BP1-PMS2P11	-1.17014	-1.38596	-3.2706	0.00122723	0.0126978	-1.11969
ENSG00000213420.8	chr7	GPC2	-1.43914	-0.144887	-3.24411	0.00134203	0.0134437	-1.12001
ENSG00000176092.15	chr1	CRYBG2	-1.35012	-0.132165	-3.24376	0.0013436	0.0134489	-1.12053
ENSG00000279246.1	chr11	AP003108.3	-1.00444	-2.05696	-3.29538	0.00112814	0.0120565	-1.12362
ENSG00000277744.1	chr19	AC011462.5	-1.72578	-2.46247	-3.31505	0.00105487	0.0114669	-1.1253
ENSG00000149212.11	chr11	SESN3	-1.07752	6.73567	-3.34351	0.000956653	0.0107603	-1.13112
ENSG00000252933.1	chr19	RNU6-1223P	-1.56109	-2.00393	-3.28814	0.0011563	0.0122526	-1.13593
ENSG00000133317.14	chr11	LGALS12	-1.16101	-0.607164	-3.2437	0.00134389	0.0134489	-1.13973
ENSG00000262228.2	chr17	AC087392.3	-1.24864	-1.48307	-3.2633	0.0012579	0.0129156	-1.14708
ENSG00000129007.14	chr15	CALML4	-1.2534	-3.00495	-3.33606	0.000981519	0.0109423	-1.15359
ENSG00000111186.13	chr12	WNT5B	1.3116	1.06078	3.22347	0.00143828	0.0140856	-1.15759
ENSG00000125810.10	chr20	CD93	-0.93365	4.42421	-3.29953	0.00111232	0.0119508	-1.15881
ENSG00000250130.1	chr15	AC090519.1	-1.07434	-1.73915	-3.26753	0.00124003	0.0128039	-1.16028
ENSG00000283929.1	chr17	MIR5010	-1.52588	-3.4206	-3.3623	0.000896546	0.0103029	-1.16069
ENSG00000270012.1	chrX	AC232271.1	-0.863149	1.52653	-3.22147	0.00144793	0.0141426	-1.16832
ENSG00000266714.9	chr17	MYO15B	-1.61054	5.86968	-3.32607	0.00101578	0.0112064	-1.16992
ENSG00000279789.1	chr16	AC120114.3	-1.21045	0.216511	-3.2214	0.00144831	0.0141426	-1.17197
ENSG00000080493.17	chr4	SLC4A4	-1.22057	-1.22591	-3.24502	0.00133792	0.0134225	-1.1738
ENSG00000228363.2	chr2	AC015971.1	-1.37571	-2.93933	-3.32343	0.00102503	0.0112469	-1.17401
ENSG00000240890.2	chr3	AC020633.1	-1.60757	-3.13868	-3.33619	0.000981064	0.0109423	-1.17491
ENSG00000284825.1	chr6	AL121935.1	-1.19271	0.140468	-3.21951	0.00145746	0.0141838	-1.17884
ENSG00000260714.1	chr16	AC133552.1	-1.11107	-2.358	-3.2877	0.00115805	0.0122526	-1.17987
ENSG00000260188.1	chr6	AC002464.1	-1.43162	-2.26902	-3.28148	0.00118276	0.0123979	-1.18422
ENSG00000170074.19	chr5	FAM153A	-1.92391	-2.30459	-3.27998	0.00118882	0.0124269	-1.1924
ENSG00000254634.4	chr16	SMG1P6	-1.35138	-1.26621	-3.23703	0.00137434	0.0136068	-1.19765
ENSG00000272745.1	chr7	AC004948.1	-0.972482	-1.72684	-3.2507	0.00131255	0.0132671	-1.20217
ENSG00000186399.10	chr15	GOLGA8R	-1.35663	-1.28148	-3.23557	0.00138111	0.0136384	-1.2026
ENSG00000268849.5	chr19	SIGLEC22P	-1.20998	-1.85826	-3.25509	0.00129329	0.0131255	-1.20419
ENSG00000183134.5	chr11	PTGDR2	-1.18482	-1.61259	-3.24464	0.00133963	0.0134263	-1.2069
ENSG00000113924.12	chr3	HGD	-1.17172	-1.08961	-3.22709	0.00142095	0.0139564	-1.21109
ENSG00000134245.18	chr1	WNT2B	-1.3034	-1.49608	-3.23882	0.00136612	0.0135626	-1.21154
ENSG00000244731.8	chr6	C4A	1.51504	0.64827	3.20322	0.00153891	0.0146738	-1.21516
ENSG00000277301.1	chr20	AL034550.2	-1.56257	-0.972695	-3.22227	0.00144406	0.0141354	-1.21631
ENSG00000272578.5	chr22	AP000347.1	-1.15206	0.729038	-3.19953	0.00155793	0.0147831	-1.22472
ENSG00000273192.1	chr22	AL671710.1	-0.944752	-1.28777	-3.22695	0.00142162	0.0139564	-1.22545
ENSG00000137070.17	chr9	IL11RA	-1.10781	3.06644	-3.2298	0.00140811	0.0138643	-1.2267
ENSG00000248124.7	chr16	RRN3P1	-0.878214	2.74616	-3.22014	0.00145442	0.0141748	-1.22865
ENSG00000143127.13	chr1	ITGA10	-1.07865	0.763679	-3.19732	0.00156946	0.0148715	-1.23064
ENSG00000280828.1	chr7	AC090114.3	-1.21676	-0.365759	-3.20458	0.00153198	0.0146414	-1.23418
ENSG00000268743.1	chr19	AC008737.1	-1.47801	-3.04955	-3.30427	0.00109447	0.0117968	-1.23752
ENSG00000115085.13	chr2	ZAP70	-0.99847	3.42146	-3.23748	0.00137227	0.0136045	-1.23829
ENSG00000157992.12	chr2	KRTCAP3	-0.997719	1.16786	-3.19279	0.0015933	0.0150095	-1.2439
ENSG00000182310.14	chr19	SPACA6	-1.18748	-1.8128	-3.23699	0.00137453	0.0136068	-1.24553
ENSG00000161180.11	chr22	CCDC116	-1.06546	-1.72422	-3.23244	0.0013957	0.0137555	-1.24849
ENSG00000160111.13	chr19	CPAMD8	-1.07211	0.912796	-3.19034	0.00160628	0.0150856	-1.24955
ENSG00000108813.11	chr17	DLX4	1.28423	-2.31017	3.2564	0.00128758	0.0131104	-1.2518
ENSG00000150556.17	chr2	LYPD6B	1.49577	-1.06309	3.20851	0.00151201	0.0145183	-1.25786
ENSG00000243406.6	chr13	MRPS31P5	-0.955925	0.579322	-3.18717	0.00162326	0.0151743	-1.25981
ENSG00000251535.1	chr4	AC079140.4	-1.13333	-2.05169	-3.24106	0.00135586	0.0135262	-1.2602
ENSG00000206149.10	chr15	HERC2P9	-0.949501	2.53724	-3.20389	0.00153548	0.0146541	-1.26114
ENSG00000176597.12	chr3	B3GNT5	-1.08293	1.77861	-3.19088	0.0016034	0.0150656	-1.26151
ENSG00000055955.16	chr3	ITIH4	-1.34985	-2.4749	-3.26	0.00127201	0.0130088	-1.26349
ENSG00000258366.8	chr20	RTEL1	-1.21477	-1.38434	-3.21474	0.00148091	0.0143206	-1.26438
ENSG00000165617.14	chr14	DACT1	-1.49903	1.35758	-3.18616	0.00162874	0.0152114	-1.26472
ENSG00000182841.12	chr22	RRP7BP	-0.903318	3.16583	-3.21924	0.00145877	0.0141898	-1.26697
ENSG00000270419.1	chr6	CAHM	-0.977554	-0.820219	-3.19936	0.00155886	0.0147849	-1.26787
ENSG00000260729.1	chr15	AC009690.1	-1.54841	-1.89867	-3.2307	0.00140387	0.0138293	-1.27007
ENSG00000269397.1	chr19	AC011503.2	-1.06709	-2.09678	-3.23904	0.00136511	0.0135626	-1.27023
ENSG00000262663.1	chr17	AC087222.1	-1.43748	-2.07268	-3.2359	0.00137957	0.0136384	-1.27541
ENSG00000280388.1	chr7	AC006330.1	-1.24832	-1.29056	-3.20741	0.00151758	0.0145425	-1.27618
ENSG00000057468.7	chr1	MSH4	-1.62548	-2.31824	-3.24468	0.00133946	0.0134263	-1.28182
ENSG00000213073.4	chr6	AL353625.1	-0.855788	0.55337	-3.17777	0.00167465	0.0154752	-1.28572
ENSG00000249655.1	chr5	AC008434.1	-1.60642	-3.03228	-3.28164	0.00118214	0.0123979	-1.28915
ENSG00000166707.11	chrX	ZCCHC18	-1.0245	2.57693	-3.19496	0.00158184	0.0149536	-1.28966
ENSG00000130558.19	chr9	OLFM1	-1.47955	-0.976452	-3.19421	0.00158576	0.0149767	-1.28988
ENSG00000181458.10	chr3	TMEM45A	1.53018	-1.36708	3.20039	0.0015535	0.0147619	-1.29991
ENSG00000140323.6	chr15	DISP2	1.1162	0.100635	3.17449	0.00169296	0.0155943	-1.30152
ENSG00000253448.1	chr22	IGLV3-6	1.99777	-4.3456	3.37881	0.000846674	0.0099049	-1.30441
ENSG00000275437.1	chr20	AL121832.3	-0.965099	-0.644426	-3.18057	0.00165919	0.0153888	-1.30881
ENSG00000128917.8	chr15	DLL4	-1.74789	-1.94982	-3.21601	0.00147462	0.0142818	-1.31216
ENSG00000100628.11	chr14	ASB2	1.0732	-0.586581	3.17817	0.00167244	0.0154689	-1.31268
ENSG00000162545.6	chr1	CAMK2N1	-1.85275	4.10896	-3.23636	0.00137743	0.0136289	-1.31729
ENSG00000230825.1	chr7	AC005532.1	1.1014	-0.999995	3.18307	0.00164551	0.015283	-1.32018
ENSG00000203812.2	chr1	HIST2H2AA3	0.965634	-1.1803	3.18632	0.00162789	0.0152105	-1.3229
ENSG00000177191.2	chr19	B3GNT8	-0.94492	-0.166671	-3.16828	0.00172807	0.0158669	-1.32457
ENSG00000070371.16	chr22	CLTCL1	-0.944878	1.2549	-3.16361	0.0017549	0.0160245	-1.32589
ENSG00000119608.12	chr14	PROX2	1.42828	-2.19017	3.22057	0.0014523	0.0141746	-1.32655
ENSG00000278668.1	chr17	AC005899.7	-1.26345	-2.20632	-3.22029	0.0014537	0.0141746	-1.32908
ENSG00000235530.6	chr17	AC087294.1	-1.13246	-2.06595	-3.21391	0.00148502	0.014344	-1.32951
ENSG00000196696.12	chr16	AC009022.1	-1.21887	1.48744	-3.16349	0.00175558	0.0160245	-1.33047
ENSG00000211652.2	chr22	IGLV7-43	2.16813	1.99312	3.16689	0.00173599	0.0159232	-1.33743
ENSG00000211592.8	chr2	IGKC	1.90117	12.951	3.25887	0.00127688	0.0130381	-1.34039
ENSG00000205041.1	chr19	AC118344.1	-1.2802	-0.246342	-3.16313	0.00175768	0.0160292	-1.34048
ENSG00000230068.2	chr1	CDC42-IT1	-1.36539	-2.04155	-3.20776	0.00151579	0.0145408	-1.34221
ENSG00000277425.1	chr20	AL121890.4	-1.33952	-3.45964	-3.28793	0.00115714	0.0122526	-1.34276
ENSG00000172927.8	chr11	MYEOV	1.7523	0.530082	3.15643	0.00179694	0.0162547	-1.34388
ENSG00000279342.2	chr11	AP000866.6	-0.971371	0.821804	-3.15472	0.0018071	0.0163027	-1.34733
ENSG00000082196.20	chr5	C1QTNF3	-0.817268	0.913701	-3.14827	0.00184585	0.0164972	-1.36511
ENSG00000246859.2	chr5	STARD4-AS1	-1.72055	-1.63926	-3.18324	0.00164457	0.015283	-1.36537
ENSG00000241288.7	chr3	LINC02614	-1.21928	-1.84711	-3.1883	0.00161721	0.0151529	-1.37134
ENSG00000237886.1	chr9	NALT1	-1.65232	-1.95279	-3.19209	0.00159699	0.015032	-1.37212
ENSG00000282936.1	chr17	AC004706.3	-0.811755	-0.185481	-3.15024	0.00183394	0.0164131	-1.37291
ENSG00000161653.10	chr17	NAGS	-0.831287	-0.406098	-3.15248	0.00182044	0.0163718	-1.37352
ENSG00000196295.11	chr7	GARS-DT	-1.00431	4.79433	-3.2403	0.00135933	0.0135496	-1.37385
ENSG00000222041.11	chr2	CYTOR	0.985169	1.83579	3.15035	0.00183327	0.0164131	-1.37764
ENSG00000278949.1	chr12	AC127070.4	-1.2749	-0.581441	-3.15233	0.00182133	0.0163725	-1.38017
ENSG00000061656.9	chr20	SPAG4	1.1884	3.28739	3.18359	0.00164267	0.015283	-1.38353
ENSG00000250878.3	chr13	METTL21EP	-1.35454	-2.83132	-3.22864	0.00141361	0.013903	-1.38683
ENSG00000180953.11	chr15	ST20	-0.891571	0.192201	-3.14002	0.00189651	0.0167785	-1.39207
ENSG00000254463.1	chr11	PPIAP41	-1.17721	-1.45536	-3.16679	0.00173657	0.0159232	-1.39214
ENSG00000227671.4	chr1	AL390728.4	-0.865018	5.43065	-3.24726	0.00132786	0.0133682	-1.39532
ENSG00000256448.5	chr11	AP000763.3	-1.07635	-0.0518491	-3.1399	0.00189726	0.0167785	-1.39701
ENSG00000200769.1	chr7	RF00019	-1.45228	-2.52712	-3.20721	0.00151858	0.0145425	-1.39881
ENSG00000236963.6	chr1	LINC01141	-2.12689	-1.17696	-3.1566	0.00179595	0.0162531	-1.39891
ENSG00000139970.17	chr14	RTN1	-1.20183	1.12663	-3.13454	0.00193091	0.0169417	-1.40426
ENSG00000243629.1	chr3	LINC00880	1.51448	-3.29219	3.24604	0.00133335	0.01339	-1.41324
ENSG00000105877.18	chr7	DNAH11	0.981792	-1.8748	3.16977	0.00171957	0.0158032	-1.42004
ENSG00000229806.1	chr3	RPS15P5	0.808071	-2.0192	3.17502	0.00168995	0.0155737	-1.42095
ENSG00000251728.1	chr7	RF00019	-1.15778	-1.63631	-3.16049	0.00177308	0.016104	-1.42227
ENSG00000279159.1	chr22	AC003681.1	-0.955606	-2.10831	-3.17747	0.00167634	0.0154765	-1.42396
ENSG00000211942.3	chr14	IGHV3-13	2.55961	0.499394	3.12644	0.00198276	0.0172912	-1.42488
ENSG00000267767.2	chr19	LINC01801	-0.996173	-0.824607	-3.139	0.00190288	0.016792	-1.42503
ENSG00000143797.12	chr2	MBOAT2	-1.0413	2.17923	-3.13804	0.00190887	0.0168216	-1.4278
ENSG00000265195.1	chr15	MIR4312	-1.57537	-3.30152	-3.23945	0.00136323	0.0135626	-1.43002
ENSG00000248712.7	chr11	CCDC153	-0.963837	-1.7728	-3.16114	0.00176928	0.016084	-1.43226
ENSG00000224066.1	chr1	AL049795.1	-1.29532	-0.108536	-3.12573	0.00198737	0.0173063	-1.43567
ENSG00000240233.3	chr14	RN7SL587P	-1.40336	-3.18818	-3.22932	0.00141037	0.0138798	-1.43634
ENSG00000134138.20	chr15	MEIS2	2.29981	-3.59806	3.25716	0.00128427	0.0130863	-1.43712
ENSG00000211672.2	chr22	IGLV4-3	1.68196	-1.97217	3.16613	0.00174038	0.0159364	-1.43827
ENSG00000232411.1	chr2	AC009495.2	-1.44407	-3.01035	-3.2163	0.0014732	0.0142749	-1.44099
ENSG00000237548.1	chr9	TTLL11-IT1	-1.89835	-3.85004	-3.27183	0.00122211	0.0126578	-1.44754
ENSG00000201944.1	chr1	RF00139	-1.58147	-3.75754	-3.26391	0.00125531	0.0129087	-1.44909
ENSG00000223692.1	chr21	DIP2A-IT1	-1.28783	-1.16907	-3.13622	0.00192028	0.0168926	-1.45031
ENSG00000130270.16	chr19	ATP8B3	-0.872456	0.647059	-3.11618	0.00205026	0.0177264	-1.45174
ENSG00000110723.12	chr11	EXPH5	-1.42318	-2.07786	-3.16122	0.00176878	0.016084	-1.46069
ENSG00000164136.17	chr4	IL15	-1.00353	2.74456	-3.13908	0.00190238	0.016792	-1.4626
ENSG00000268230.5	chr19	AC012313.3	-1.44248	-3.16366	-3.21474	0.00148092	0.0143206	-1.46672
ENSG00000224985.1	chr1	AL590714.1	0.861069	-2.25486	3.16578	0.00174237	0.0159473	-1.46788
ENSG00000135519.8	chr12	KCNH3	-1.09747	0.658447	-3.10971	0.00209396	0.0179961	-1.46908
ENSG00000117013.16	chr1	KCNQ4	-1.01665	0.123254	-3.10876	0.00210044	0.0180364	-1.47603
ENSG00000133624.13	chr7	ZNF767P	-0.917025	3.68124	-3.16651	0.00173819	0.0159307	-1.47614
ENSG00000159433.12	chr15	STARD9	-1.23711	2.95898	-3.13989	0.00189732	0.0167785	-1.47855
ENSG00000263707.1	chr17	AC005277.1	-1.44555	-3.31178	-3.21802	0.00146478	0.0142275	-1.48124
ENSG00000213918.10	chr16	DNASE1	-0.861034	4.52345	-3.19502	0.00158149	0.0149536	-1.48516
ENSG00000160593.18	chr11	JAML	-0.830652	4.16044	-3.18041	0.00166006	0.0153898	-1.49
ENSG00000155367.15	chr1	PPM1J	-0.862155	0.133493	-3.10018	0.00215986	0.0184054	-1.49848
ENSG00000224557.7	chr6	HLA-DPB2	1.52628	-2.23631	3.15152	0.0018262	0.0164042	-1.50048
ENSG00000280069.1	chr17	AC127024.8	-1.35876	-2.30804	-3.15389	0.00181204	0.0163159	-1.50236
ENSG00000272823.1	chr1	AL445423.1	-1.44748	-2.41697	-3.15738	0.0017913	0.0162229	-1.5059
ENSG00000271734.1	chr6	Z98200.1	-1.46894	-3.54817	-3.22169	0.00144686	0.0141426	-1.50982
ENSG00000196502.11	chr16	SULT1A1	-0.971613	2.88077	-3.12564	0.00198793	0.0173063	-1.51235
ENSG00000218809.1	chr6	AL391903.1	-1.64577	-3.30284	-3.20318	0.00153913	0.0146738	-1.51408
ENSG00000173166.18	chr2	RAPH1	-1.28121	-0.647139	-3.09604	0.00218908	0.0185758	-1.52819
ENSG00000230393.1	chr2	AC092667.1	-1.31934	-2.55197	-3.1543	0.00180958	0.0163105	-1.52866
ENSG00000184524.6	chr11	CEND1	1.49471	-3.10635	3.18397	0.0016406	0.015283	-1.53
ENSG00000272034.1	chr11	SNORD14A	-0.955285	1.05039	-3.08774	0.00224878	0.0189785	-1.53032
ENSG00000125430.9	chr17	HS3ST3B1	-1.07798	1.84718	-3.09535	0.00219402	0.018602	-1.53095
ENSG00000259209.3	chr16	AC004943.1	-1.07787	-2.05764	-3.13144	0.00195061	0.017067	-1.53133
ENSG00000254459.1	chr11	AP002812.2	-1.31923	-2.5685	-3.15147	0.00182649	0.0164042	-1.5373
ENSG00000101307.15	chr20	SIRPB1	-0.804649	2.766	-3.1121	0.00207771	0.017899	-1.54104
ENSG00000154736.6	chr21	ADAMTS5	-1.59194	-2.42164	-3.14285	0.00187898	0.0166676	-1.5412
ENSG00000248445.5	chr5	SEMA6A-AS1	-1.00594	1.30881	-3.08508	0.0022682	0.0190625	-1.54195
ENSG00000225091.3	chr20	SNORA71A	-1.41018	-2.60157	-3.15105	0.00182906	0.0164131	-1.54218
ENSG00000237781.3	chr1	AL356356.1	-1.45165	-0.996597	-3.09571	0.0021914	0.0185877	-1.54364
ENSG00000229677.1	chr7	AC018644.1	-0.845848	-0.226054	-3.08524	0.00226705	0.0190608	-1.544
ENSG00000250673.2	chr4	REELD1	-1.22471	0.128347	-3.08102	0.00229816	0.0192401	-1.54881
ENSG00000196329.11	chr7	GIMAP5	-1.81504	-1.90786	-3.11796	0.00203842	0.0176543	-1.55044
ENSG00000198429.9	chr19	ZNF69	-0.846602	1.05113	-3.08002	0.00230563	0.0192726	-1.55109
ENSG00000144677.15	chr3	CTDSPL	-1.13165	1.05967	-3.07908	0.00231264	0.0192942	-1.55373
ENSG00000242766.1	chr2	IGKV1D-17	2.87664	-2.31758	3.13251	0.00194374	0.0170246	-1.55474
ENSG00000086288.11	chr7	NME8	-1.45958	-2.2812	-3.12891	0.00196683	0.0171746	-1.5596
ENSG00000232553.3	chr7	CLK2P1	-0.952208	-2.66885	-3.14593	0.00186005	0.0165656	-1.56222
ENSG00000171812.13	chr1	COL8A2	-0.924144	-0.915007	-3.08632	0.00225913	0.0190462	-1.56362
ENSG00000211962.2	chr14	IGHV1-46	2.00224	2.60149	3.09764	0.00217775	0.018503	-1.56877
ENSG00000113749.7	chr5	HRH2	-0.804453	2.48462	-3.09362	0.00220632	0.0186907	-1.57147
ENSG00000150048.10	chr12	CLEC1A	-1.35983	-3.75152	-3.20721	0.0015186	0.0145425	-1.57564
ENSG00000160271.16	chr9	RALGDS	-0.818178	3.1083	-3.10929	0.0020968	0.0180129	-1.58013
ENSG00000149050.10	chr11	ZNF214	-1.72722	-3.92485	-3.21772	0.00146624	0.014228	-1.5816
ENSG00000164509.14	chr5	IL31RA	-1.45919	-3.45203	-3.18313	0.00164517	0.015283	-1.58231
ENSG00000275888.1	chr17	AC132872.3	-1.56445	-3.40949	-3.17827	0.00167188	0.0154689	-1.58693
ENSG00000122224.18	chr1	LY9	1.07965	5.82708	3.18863	0.00161545	0.0151529	-1.58892
ENSG00000163082.10	chr2	SGPP2	-1.36893	4.26414	-3.15054	0.00183209	0.0164131	-1.58966
ENSG00000272405.1	chr1	AL365181.3	1.65185	-1.01557	3.07685	0.00232937	0.0193586	-1.59209
ENSG00000225891.1	chr1	AL513365.2	-1.07556	-0.719076	-3.0697	0.0023837	0.0196963	-1.5979
ENSG00000107485.17	chr10	GATA3	-1.52343	1.61698	-3.06725	0.0024026	0.0197795	-1.59905
ENSG00000180616.9	chr17	SSTR2	1.30306	-3.28455	3.16426	0.00175116	0.0160132	-1.60052
ENSG00000258645.2	chr14	HSPE1P2	1.10775	-2.97766	3.14412	0.00187116	0.01663	-1.60488
ENSG00000285215.2	chr1	AC241377.4	-1.42349	-2.39285	-3.11145	0.00208214	0.0179251	-1.61282
ENSG00000241120.1	chr3	HMGN1P8	-1.34182	-3.08492	-3.14593	0.00186009	0.0165656	-1.61483
ENSG00000256361.1	chr11	AC027544.1	-1.38657	-1.83318	-3.08862	0.00224237	0.0189323	-1.61552
ENSG00000268947.1	chr19	AC002128.1	-1.62306	-1.61419	-3.07881	0.00231468	0.0193002	-1.62272
ENSG00000249786.7	chr3	EAF1-AS1	-1.06814	-2.18398	-3.09804	0.0021749	0.0185	-1.62382
ENSG00000170049.9	chr17	KCNAB3	-1.22801	0.957391	-3.05213	0.00252221	0.0204502	-1.62438
ENSG00000196557.13	chr16	CACNA1H	-1.4813	-2.95836	-3.13388	0.00193506	0.0169707	-1.62604
ENSG00000126010.5	chrX	GRPR	-1.11373	-2.80575	-3.12566	0.00198781	0.0173063	-1.6261
ENSG00000251221.1	chr5	LINC01337	-1.42169	-3.39882	-3.15936	0.00177969	0.0161277	-1.62816
ENSG00000116729.14	chr1	WLS	-1.00731	0.346962	-3.04946	0.00254395	0.0205402	-1.62933
ENSG00000244722.1	chr3	RPSAP29	1.14686	-3.24302	3.14742	0.00185099	0.0165284	-1.63297
ENSG00000004777.18	chr19	ARHGAP33	-1.02755	3.98512	-3.12446	0.00199565	0.0173661	-1.63406
ENSG00000186407.7	chr17	CD300E	-1.19807	3.7617	-3.11536	0.0020558	0.0177514	-1.63423
ENSG00000182379.10	chr12	NXPH4	-1.37798	4.67185	-3.14877	0.00184279	0.0164797	-1.63661
ENSG00000150760.12	chr10	DOCK1	-0.922872	-0.86103	-3.05511	0.00249822	0.020335	-1.64001
ENSG00000268182.6	chr19	SMIM17	-1.1433	-2.50005	-3.10318	0.00213893	0.0183045	-1.64371
ENSG00000272807.1	chr2	AC007038.2	-1.27461	-1.54857	-3.06786	0.00239784	0.0197565	-1.64493
ENSG00000257335.8	chr7	MGAM	-1.07518	1.65897	-3.05068	0.00253397	0.0205007	-1.64549
ENSG00000211645.2	chr22	IGLV1-50	1.60441	-2.65154	3.10862	0.0021014	0.0180369	-1.64769
ENSG00000286039.1	chr4	AC093849.2	2.20329	-4.18374	3.20716	0.00151886	0.0145425	-1.65025
ENSG00000187634.12	chr1	SAMD11	1.33267	-2.02344	3.08009	0.00230507	0.0192726	-1.65211
ENSG00000243488.3	chr19	RN7SL337P	-1.41785	-1.946	-3.07729	0.00232603	0.0193468	-1.6522
ENSG00000154864.12	chr18	PIEZO2	2.15021	-0.0688664	3.04184	0.00260674	0.0208981	-1.65309
ENSG00000258227.7	chr7	CLEC5A	-1.20048	0.153948	-3.03999	0.00262226	0.020973	-1.65525
ENSG00000266088.5	chr17	AC004585.1	-1.01561	1.17552	-3.03996	0.00262253	0.020973	-1.66034
ENSG00000147234.10	chrX	FRMPD3	1.56744	-0.308742	3.04021	0.00262041	0.020973	-1.66147
ENSG00000186205.13	chr1	MARC1	-0.898499	0.449857	-3.03694	0.00264793	0.0211509	-1.66164
ENSG00000228242.6	chr3	AC093495.1	-0.873361	-1.21697	-3.05195	0.00252367	0.0204502	-1.66417
ENSG00000064655.19	chr20	EYA2	1.55956	-2.43623	3.09146	0.00222185	0.0188064	-1.66453
ENSG00000163661.4	chr3	PTX3	-0.989528	0.0321777	-3.03597	0.00265613	0.0211996	-1.66686
ENSG00000234685.1	chr13	NUS1P2	-1.52471	-0.103087	-3.03549	0.00266019	0.0212216	-1.66988
ENSG00000069667.16	chr15	RORA	-1.38149	2.85365	-3.06825	0.00239484	0.0197508	-1.67214
ENSG00000227782.2	chr17	AC002553.1	-0.879895	-2.17824	-3.07743	0.002325	0.0193462	-1.67238
ENSG00000140932.10	chr16	CMTM2	-1.04587	-1.42916	-3.05305	0.00251483	0.0204197	-1.67353
ENSG00000240671.4	chr2	IGKV1-8	1.42117	0.46902	3.03223	0.00268806	0.0213877	-1.67389
ENSG00000112245.11	chr6	PTP4A1	-1.05175	-1.56769	-3.05603	0.00249081	0.0202983	-1.67509
ENSG00000162881.6	chr2	OXER1	-0.918052	0.670223	-3.03192	0.00269071	0.0213877	-1.67518
ENSG00000203995.9	chr1	ZYG11A	1.69013	-2.8877	3.10817	0.00210446	0.0180555	-1.67645
ENSG00000235703.5	chrX	LINC00894	-1.34651	1.39586	-3.03309	0.00268072	0.0213535	-1.68411
ENSG00000140450.9	chr15	ARRDC4	-1.15864	3.06617	-3.07062	0.00237665	0.0196461	-1.68555
ENSG00000237595.4	chr20	LINC01275	1.59596	-2.86161	3.10043	0.00215809	0.0184054	-1.6911
ENSG00000248514.1	chr5	AC008443.4	-1.15794	-2.1027	-3.06375	0.00242977	0.0199137	-1.69804
ENSG00000121742.18	chr13	GJB6	-1.76144	-2.4445	-3.07635	0.00233309	0.0193681	-1.7008
ENSG00000144550.13	chr3	CPNE9	-1.32233	-2.90129	-3.09741	0.00217938	0.0185091	-1.70279
ENSG00000137474.21	chr11	MYO7A	-1.28189	0.930007	-3.02203	0.00277688	0.0217685	-1.70359
ENSG00000263400.7	chr17	TMEM220-AS1	-0.999033	-0.696075	-3.02602	0.00274187	0.0216184	-1.70721
ENSG00000163629.13	chr4	PTPN13	-0.956765	-0.661448	-3.02484	0.00275216	0.0216656	-1.70911
ENSG00000244480.1	chr7	AC005154.2	-1.17193	0.114146	-3.01918	0.00280218	0.0218976	-1.70919
ENSG00000115556.14	chr2	PLCD4	-1.284	-2.76925	-3.08705	0.00225383	0.0190131	-1.7111
ENSG00000268650.3	chr19	AC005759.1	1.24173	-3.29927	3.11598	0.00205161	0.0177304	-1.71173
ENSG00000270120.1	chr16	AC007728.3	-1.4754	-3.06373	-3.10024	0.00215942	0.0184054	-1.71635
ENSG00000211650.2	chr22	IGLV5-45	2.56412	-0.901378	3.02437	0.00275626	0.0216704	-1.71833
ENSG00000154358.20	chr1	OBSCN	-0.878203	5.14581	-3.13264	0.00194292	0.0170246	-1.72205
ENSG00000134716.11	chr1	CYP2J2	1.34036	-2.47147	3.06665	0.00240722	0.0198094	-1.72619
ENSG00000274105.1	chr12	AC084824.3	-1.12793	-0.979016	-3.022	0.00277712	0.0217685	-1.72723
ENSG00000258944.1	chr14	AC004846.2	-0.961388	0.441018	-3.01097	0.00287629	0.02226	-1.72906
ENSG00000129538.14	chr14	RNASE1	1.62951	-0.884967	3.01954	0.002799	0.0218889	-1.72972
ENSG00000269971.1	chr1	AL020997.2	-1.42004	-2.77767	-3.07927	0.0023112	0.0192942	-1.72993
ENSG00000246323.2	chr5	AC113382.1	-0.930609	-2.56876	-3.06854	0.00239265	0.019748	-1.73185
ENSG00000226754.1	chr1	AL606760.1	0.846275	-1.67017	3.0354	0.002661	0.0212216	-1.73201
ENSG00000167779.9	chr12	IGFBP6	1.39232	-2.31937	3.05402	0.00250694	0.0203803	-1.74077
ENSG00000265917.1	chr12	MIR3685	-1.12656	-2.61038	-3.06568	0.00241474	0.0198389	-1.74285
ENSG00000159374.17	chr2	M1AP	-1.23454	-2.79215	-3.07298	0.0023586	0.0195209	-1.74599
ENSG00000253816.3	chr5	AC138866.1	-0.937457	-0.858891	-3.01194	0.00286741	0.022215	-1.74763
ENSG00000240531.1	chr17	RPL21P123	-1.34746	-2.81749	-3.07149	0.00236999	0.0195992	-1.75228
ENSG00000205105.6	chr13	COX17P1	0.916429	-2.72748	3.0665	0.00240837	0.0198108	-1.75361
ENSG00000231160.9	chr4	KLF3-AS1	-0.926799	0.843779	-3.00205	0.00295875	0.0227236	-1.75478
ENSG00000122861.16	chr10	PLAU	-1.34436	0.333186	-3.00048	0.0029735	0.0227675	-1.75613
ENSG00000232931.5	chr2	LINC00342	-1.19766	2.59106	-3.02899	0.002716	0.0215155	-1.75888
ENSG00000224905.6	chr21	AP001347.1	-1.00484	-1.8887	-3.03077	0.00270062	0.0214273	-1.75889
ENSG00000253161.5	chr8	LINC01605	-2.11711	-1.52959	-3.01917	0.00280228	0.0218976	-1.76203
ENSG00000167037.18	chr22	SGSM1	-1.95925	1.63117	-3.00657	0.0029167	0.0224778	-1.763
ENSG00000116299.17	chr1	KIAA1324	-1.04987	-0.244552	-2.99847	0.0029925	0.0228521	-1.76615
ENSG00000196436.8	chr16	NPIPB15	-2.36512	-0.158755	-2.99707	0.00300575	0.0228752	-1.76844
ENSG00000127364.3	chr7	TAS2R4	-1.45575	-1.47075	-3.01321	0.00285588	0.0221838	-1.77291
ENSG00000266385.1	chr17	AC005899.5	-1.34979	-3.26571	-3.08572	0.00226352	0.019047	-1.77496
ENSG00000235313.1	chr20	HM13-IT1	-0.975826	-0.636989	-2.99775	0.00299936	0.0228612	-1.7761
ENSG00000151458.12	chr4	ANKRD50	-0.899761	2.20228	-3.00866	0.00289741	0.0223548	-1.78659
ENSG00000279333.1	chr1	AC096636.1	-1.35163	-2.16194	-3.02708	0.00273256	0.0215789	-1.78968
ENSG00000125378.16	chr14	BMP4	-2.3785	-0.928131	-2.99543	0.00302139	0.0229423	-1.79084
ENSG00000255389.1	chr6	Z97989.1	-0.888946	0.977657	-2.98888	0.00308453	0.0232291	-1.79115
ENSG00000100167.20	chr22	SEPT3	1.23392	-1.62479	3.00933	0.00289123	0.0223242	-1.79161
ENSG00000279570.1	chr17	AC099804.1	-1.21633	-1.32463	-2.99931	0.00298454	0.022826	-1.79855
ENSG00000201121.1	chr3	RNY1P12	-1.37579	-3.64143	-3.09781	0.00217658	0.0185009	-1.80004
ENSG00000216775.3	chr6	AL109918.1	1.07767	2.1082	2.99993	0.0029787	0.0227899	-1.8044
ENSG00000093100.13	chr22	AC016026.1	-1.40218	-3.25874	-3.0682	0.0023952	0.0197508	-1.81302
ENSG00000130489.14	chr22	SCO2	-1.18987	-1.10334	-2.98876	0.00308576	0.0232291	-1.81395
ENSG00000161960.15	chr17	EIF4A1	-0.98206	3.69118	-3.04705	0.00256362	0.0206494	-1.82117
ENSG00000272181.1	chr3	AC012557.2	-1.12065	-2.16832	-3.01295	0.00285824	0.0221838	-1.82324
ENSG00000261408.7	chr17	TEN1-CDK3	-1.40175	-1.44548	-2.9917	0.00305728	0.0230739	-1.82331
ENSG00000091262.15	chr16	ABCC6	-1.48037	-2.83128	-3.04006	0.00262163	0.020973	-1.82525
ENSG00000240591.1	chr22	AL096701.3	-1.21523	-2.22512	-3.0124	0.00286324	0.0221931	-1.82934
ENSG00000085276.18	chr3	MECOM	-2.00555	-1.9776	-3.00131	0.00296571	0.0227443	-1.83524
ENSG00000196653.12	chr3	ZNF502	-1.48315	-1.98462	-3.00092	0.00296935	0.0227443	-1.83668
ENSG00000173578.7	chr3	XCR1	1.56535	-2.32464	3.01254	0.00286197	0.0221918	-1.83772
ENSG00000271788.1	chr5	AC008875.1	-1.15146	-2.40996	-3.01518	0.00283808	0.022066	-1.83939
ENSG00000006042.12	chr17	TMEM98	1.74689	-3.39998	3.06404	0.00242755	0.0199036	-1.84057
ENSG00000213865.7	chr8	C8orf44	-0.816772	1.59309	-2.97675	0.00320478	0.023823	-1.84066
ENSG00000221716.1	chrX	SNORA11	-1.03022	-1.48059	-2.98521	0.00312045	0.0233947	-1.84079
ENSG00000167600.14	chr19	CYP2S1	-1.16377	-0.850702	-2.97337	0.003239	0.0240401	-1.84242
ENSG00000264188.1	chr18	AC106037.1	-1.31933	-3.35661	-3.05789	0.002476	0.0202103	-1.8484
ENSG00000100095.19	chr22	SEZ6L	-1.38416	-2.15398	-3.00129	0.00296593	0.0227443	-1.8492
ENSG00000238035.8	chr5	AC138035.1	-1.11645	-0.51365	-2.96656	0.00330902	0.0243511	-1.85064
ENSG00000279518.1	chr8	AC083843.4	-1.46971	-2.49683	-3.01366	0.00285178	0.022164	-1.85102
ENSG00000278864.1	chr17	AC055811.4	-1.00778	0.856708	-2.96443	0.00333121	0.0244438	-1.85254
ENSG00000278590.1	chr2	RN7SL113P	-1.34237	-3.3475	-3.05346	0.00251152	0.020401	-1.85697
ENSG00000203896.10	chr20	LIME1	-1.13862	-0.791631	-2.96459	0.00332957	0.0244438	-1.86218
ENSG00000272334.1	chr3	AC011816.2	-0.988546	-1.68231	-2.97997	0.00317245	0.0236617	-1.86515
ENSG00000223823.1	chr1	LINC01342	-1.41348	-2.25318	-2.99726	0.00300401	0.0228706	-1.86681
ENSG00000263813.1	chr2	MIR3679	-1.52232	-3.39649	-3.05088	0.00253239	0.0205007	-1.86895
ENSG00000260645.2	chr6	AL359715.2	-1.21421	-2.45005	-3.0016	0.00296301	0.0227443	-1.87424
ENSG00000196586.14	chr6	MYO6	-1.13535	3.06481	-3.00217	0.00295766	0.0227236	-1.87616
ENSG00000163017.13	chr2	ACTG2	2.59543	-2.24984	2.99303	0.00304437	0.02303	-1.87627
ENSG00000251432.6	chr4	LINC02615	-1.04711	-0.471515	-2.95532	0.00342768	0.024937	-1.87764
ENSG00000185155.11	chr1	MIXL1	0.854197	3.29636	3.01058	0.00287983	0.0222634	-1.87767
ENSG00000261067.7	chr16	AC109460.3	-1.29474	-2.41782	-2.99809	0.00299612	0.0228591	-1.87933
ENSG00000263033.2	chr16	AC007220.1	-1.25703	-1.58365	-2.97142	0.00325894	0.02411	-1.8795
ENSG00000221184.1	chr10	AL513534.1	-1.3545	-0.261282	-2.95196	0.0034639	0.0251189	-1.88282
ENSG00000214050.8	chr8	FBXO16	1.51678	-1.24761	2.96207	0.00335595	0.0246017	-1.8847
ENSG00000198363.18	chr8	ASPH	-0.920313	4.61486	-3.06114	0.00245031	0.020025	-1.88625
ENSG00000280214.1	chr16	AC027682.7	-1.50622	-1.17353	-2.96009	0.00337688	0.0247013	-1.88632
ENSG00000284685.1	chr16	AC009093.10	-1.11069	-2.39384	-2.9916	0.00305819	0.0230739	-1.89202
ENSG00000242294.6	chr7	STAG3L5P	-1.10424	2.25857	-2.96985	0.00327505	0.0241902	-1.89492
ENSG00000239203.1	chr17	AC093484.1	-1.29402	-3.11161	-3.02143	0.00278225	0.0217974	-1.89864
ENSG00000255031.5	chr11	AP002807.1	-1.11551	1.84699	-2.95872	0.00339139	0.0247515	-1.89996
ENSG00000107317.13	chr9	PTGDS	-1.59521	-3.571	-3.04721	0.00256233	0.0206494	-1.90001
ENSG00000256152.2	chr12	AC027290.1	-1.006	0.547752	-2.94441	0.00354645	0.0255933	-1.90007
ENSG00000246922.8	chr15	UBAP1L	-1.02399	2.77516	-2.98303	0.00314199	0.0234688	-1.90049
ENSG00000185864.16	chr16	NPIPB4	-0.99589	3.08841	-2.99379	0.00303713	0.0229925	-1.90169
ENSG00000265874.1	chr11	MIR4489	-1.27199	-2.83988	-3.00353	0.00294495	0.0226349	-1.90833
ENSG00000136848.17	chr9	DAB2IP	-1.36619	3.02224	-2.98875	0.00308584	0.0232291	-1.90872
ENSG00000279632.1	chr11	AP003108.4	-1.34485	-2.40843	-2.98418	0.00313062	0.0234179	-1.91025
ENSG00000254799.1	chr11	SLC25A47P1	-1.02211	-0.927892	-2.94642	0.00352436	0.0254839	-1.91049
ENSG00000114857.18	chr3	NKTR	-0.92374	6.86383	-3.08595	0.00226187	0.019047	-1.91114
ENSG00000069188.17	chr17	SDK2	-1.20874	4.69801	-3.05466	0.00250182	0.0203551	-1.91278
ENSG00000230715.3	chr7	AC018638.2	-1.04476	3.1918	-2.99224	0.00305203	0.0230706	-1.91694
ENSG00000235946.1	chrX	AC234783.1	-0.899193	-2.34049	-2.97766	0.00319562	0.0237776	-1.91924
ENSG00000279821.1	chr5	AC145098.2	-1.35564	-3.11001	-3.01004	0.00288475	0.0222912	-1.92357
ENSG00000253818.1	chr22	IGLV1-41	1.84799	-3.41054	3.02564	0.00274513	0.0216356	-1.92572
ENSG00000100197.22	chr22	CYP2D6	-1.45568	-2.10699	-2.9665	0.00330967	0.0243511	-1.92603
ENSG00000228397.2	chr1	LINC01635	1.19309	-2.75817	2.99069	0.00306703	0.0231146	-1.92864
ENSG00000159403.17	chr12	C1R	1.03678	0.997193	2.93527	0.00364889	0.0261033	-1.9302
ENSG00000178015.5	chr5	GPR150	0.819643	-0.551485	2.93422	0.00366091	0.0261428	-1.93097
ENSG00000286201.1	chrY	AC011751.1	-1.69343	-4.21225	-3.07601	0.00233566	0.0193789	-1.93311
ENSG00000149527.18	chr1	PLCH2	-1.13619	2.63088	-2.9662	0.0033128	0.0243653	-1.93341
ENSG00000188747.8	chr9	NOXA1	-0.856912	3.14951	-2.98307	0.00314166	0.0234688	-1.93762
ENSG00000153789.13	chr16	FAM92B	2.05316	-0.0477042	2.92897	0.0037211	0.0263856	-1.93806
ENSG00000275714.1	chr6	HIST1H3A	0.878204	-0.646916	2.93096	0.00369822	0.0262974	-1.94079
ENSG00000170909.13	chr19	OSCAR	-0.985897	0.580323	-2.92836	0.00372818	0.0264079	-1.94107
ENSG00000169432.15	chr2	SCN9A	-1.23531	-1.96757	-2.95451	0.00343634	0.0249729	-1.94358
ENSG00000112655.16	chr6	PTK7	-1.21654	0.412827	-2.92619	0.0037534	0.0265306	-1.94517
ENSG00000165071.14	chr8	TMEM71	-0.865881	4.2753	-3.02699	0.00273337	0.0215789	-1.94749
ENSG00000276916.1	chr13	AL442125.2	-1.11899	-2.56254	-2.9732	0.00324076	0.0240401	-1.94905
ENSG00000267546.2	chr17	AC015802.4	-1.07313	-2.85471	-2.98554	0.00311724	0.0233793	-1.94995
ENSG00000106070.19	chr7	GRB10	-0.935276	0.34651	-2.92368	0.00378273	0.0266445	-1.95112
ENSG00000237836.5	chrX	PHKA2-AS1	-1.32236	-1.80391	-2.94582	0.00353096	0.0255134	-1.95293
ENSG00000170522.9	chr4	ELOVL6	-1.04095	0.689361	-2.92094	0.00381502	0.0267955	-1.96118
ENSG00000177706.9	chr7	FAM20C	-1.04216	0.613315	-2.92051	0.00382011	0.026814	-1.96128
ENSG00000234353.2	chr22	AP000346.2	-1.39849	-1.53861	-2.93422	0.00366086	0.0261428	-1.96484
ENSG00000259038.1	chr14	AL121820.2	-1.31931	-3.20424	-2.99586	0.00301727	0.0229283	-1.96549
ENSG00000184985.16	chr4	SORCS2	-1.38835	-3.81458	-3.03174	0.00269224	0.0213877	-1.96651
ENSG00000239419.3	chr7	RN7SL535P	-1.36361	-2.74283	-2.97236	0.00324927	0.0240705	-1.96803
ENSG00000260601.1	chr16	AC131391.1	-1.58175	-3.21138	-2.99468	0.00302857	0.0229449	-1.96889
ENSG00000100290.3	chr22	BIK	1.11438	2.2402	2.94117	0.00358249	0.0257386	-1.97019
ENSG00000167874.6	chr17	TMEM88	-1.39686	-0.44046	-2.91732	0.00385806	0.0269707	-1.9705
ENSG00000233608.4	chr2	TWIST2	-1.43907	-3.81716	-3.0284	0.0027211	0.0215419	-1.97393
ENSG00000139193.3	chr12	CD27	1.01727	6.69816	3.06321	0.00243399	0.0199401	-1.97586
ENSG00000074276.10	chr5	CDHR2	-1.05673	-2.24499	-2.94869	0.0034994	0.0253307	-1.97747
ENSG00000088367.22	chr20	EPB41L1	1.36766	1.13185	2.917	0.00386188	0.0269849	-1.98041
ENSG00000211933.2	chr14	IGHV6-1	2.46927	1.5675	2.92282	0.00379284	0.026682	-1.98083
ENSG00000149573.9	chr11	MPZL2	-1.24595	-1.87182	-2.93479	0.00365441	0.0261329	-1.98281
ENSG00000260774.1	chr5	AC021087.3	-0.931709	-1.0514	-2.91781	0.00385225	0.0269565	-1.98324
ENSG00000019991.17	chr7	HGF	-0.901616	0.45485	-2.9091	0.0039574	0.0273918	-1.98837
ENSG00000199691.1	chr20	RN7SKP173	-1.55943	-2.62203	-2.95808	0.00339821	0.0247763	-1.98844
ENSG00000109063.15	chr17	MYH3	-1.08991	1.85265	-2.9248	0.00376957	0.0266076	-1.98948
ENSG00000130707.17	chr9	ASS1	1.86388	-0.526122	2.90978	0.00394917	0.0273821	-1.99014
ENSG00000254995.4	chr20	STX16-NPEPL1	-1.48824	0.297372	-2.90753	0.00397662	0.0274816	-1.99126
ENSG00000110237.4	chr11	ARHGEF17	-1.01073	0.0795808	-2.90516	0.00400586	0.0276174	-1.99671
ENSG00000280007.1	chr22	AC008079.1	-1.32156	-3.33143	-2.98829	0.00309032	0.0232342	-1.99681
ENSG00000260027.4	chr17	HOXB7	1.36764	0.458724	2.90484	0.00400983	0.0276316	-1.99907
ENSG00000181631.7	chr3	P2RY13	-0.834953	2.02364	-2.92449	0.00377318	0.0266192	-2.00012
ENSG00000227388.2	chr9	AL133410.1	-0.961985	-0.996775	-2.90564	0.00399989	0.0275951	-2.01057
ENSG00000284707.1	chr7	AC079781.5	-1.09528	0.757796	-2.90167	0.00404921	0.0278116	-2.01092
ENSG00000275557.1	chr1	AC242842.1	-0.977193	-2.40843	-2.93918	0.00360481	0.0258798	-2.01215
ENSG00000199733.1	chr10	RNA5SP307	-1.3812	-3.25587	-2.97565	0.00321591	0.0238969	-2.01528
ENSG00000226002.1	chr7	GTF2IP14	-0.918589	-1.37737	-2.90423	0.00401744	0.0276499	-2.02764
ENSG00000137501.17	chr11	SYTL2	-1.04753	1.70204	-2.90585	0.00399738	0.0275873	-2.03106
ENSG00000238105.7	chr12	GOLGA2P5	-0.881551	4.48189	-3.00475	0.00293354	0.022573	-2.03312
ENSG00000146205.13	chr2	ANO7	-1.06779	-1.46691	-2.90323	0.00402987	0.0277071	-2.03394
ENSG00000232653.8	chr15	GOLGA8N	-1.06834	-0.706618	-2.89103	0.0041841	0.0284351	-2.03853
ENSG00000047648.22	chrX	ARHGAP6	1.41041	1.10135	2.8906	0.00418962	0.0284404	-2.04682
ENSG00000169682.18	chr16	SPNS1	-1.01038	0.372231	-2.88521	0.00425962	0.0287554	-2.04723
ENSG00000231475.3	chr14	IGHV4-31	2.02111	1.0457	2.88703	0.00423594	0.0286257	-2.05432
ENSG00000258365.1	chr12	AC073655.2	-0.912678	-0.478385	-2.88287	0.00429039	0.0288677	-2.05465
ENSG00000272196.2	chr1	HIST2H2AA4	0.958946	-1.8736	2.90337	0.00402801	0.0277071	-2.05518
ENSG00000265967.1	chr15	AC100830.3	-1.06509	-2.21083	-2.91309	0.00390888	0.0272095	-2.05554
ENSG00000110169.11	chr11	HPX	-1.31788	-2.77494	-2.93366	0.00366727	0.0261604	-2.05671
ENSG00000232732.10	chr2	AC097717.1	-1.10459	-1.50684	-2.89423	0.00414311	0.0282638	-2.05673
ENSG00000221500.1	chr6	SNORD100	-1.01904	-1.55115	-2.89489	0.00413474	0.028226	-2.05729
ENSG00000257446.3	chr19	ZNF878	-1.23742	-2.28066	-2.91368	0.00390182	0.0271698	-2.05939
ENSG00000188171.16	chr19	ZNF626	-0.820985	3.67794	-2.96108	0.00336643	0.0246449	-2.05949
ENSG00000280401.1	chr10	AC022532.1	-0.935096	-1.3278	-2.88971	0.0042011	0.0284858	-2.0596
ENSG00000214960.10	chr7	ISPD	-0.930174	-0.343038	-2.87995	0.00432896	0.0290303	-2.06032
ENSG00000176273.15	chr10	SLC35G1	0.875402	0.725485	2.88012	0.00432671	0.0290248	-2.06447
ENSG00000224769.1	chr3	MUC20P1	-1.56008	-2.6166	-2.92301	0.00379063	0.026682	-2.06587
ENSG00000225092.2	chr6	AL355336.1	-1.46033	-3.49425	-2.96498	0.00332551	0.0244319	-2.06608
ENSG00000235245.1	chr10	AL360181.2	-1.25685	0.770484	-2.87831	0.00435073	0.0291289	-2.06983
ENSG00000166246.14	chr16	C16orf71	0.93908	-2.43593	2.9123	0.00391852	0.0272578	-2.07452
ENSG00000236577.1	chr13	SNRPGP14	-1.02898	-1.82063	-2.89336	0.00415433	0.0283115	-2.07499
ENSG00000130147.16	chr2	SH3BP4	-1.26568	-0.247101	-2.87353	0.0044149	0.0293719	-2.07519
ENSG00000230306.1	chr10	BANF1P2	-0.939093	-1.85118	-2.89056	0.00419017	0.0284404	-2.08313
ENSG00000263961.8	chr1	RHEX	-0.993825	1.95777	-2.89095	0.00418518	0.0284351	-2.08373
ENSG00000151882.11	chr5	CCL28	-0.975664	2.44277	-2.90327	0.00402934	0.0277071	-2.08573
ENSG00000267263.1	chr17	AC111170.2	-1.3054	-1.91863	-2.8894	0.00420515	0.028494	-2.08976
ENSG00000272356.1	chr6	AL080317.3	-0.877602	-0.434349	-2.86674	0.0045076	0.0298016	-2.09303
ENSG00000224950.2	chr1	AL390066.1	-1.15566	0.299227	-2.86639	0.00451245	0.0298239	-2.09315
ENSG00000265753.2	chr1	RN7SL444P	-1.20279	-2.86204	-2.91936	0.00383379	0.0268726	-2.09617
ENSG00000197183.14	chr20	NOL4L	-0.900572	4.25586	-2.97261	0.00324672	0.0240637	-2.09798
ENSG00000236567.2	chr9	TCF3P1	-1.33523	-3.05721	-2.92718	0.00374185	0.0264676	-2.09835
ENSG00000274466.1	chr16	MIR1273H	-1.22451	-2.30248	-2.89645	0.00411498	0.02811	-2.09959
ENSG00000267737.1	chr17	AC087645.2	-0.971569	-1.69873	-2.87909	0.00434042	0.0290962	-2.10104
ENSG00000135362.14	chr11	PRR5L	-0.975532	1.34005	-2.87215	0.00443359	0.0294573	-2.10164
ENSG00000237693.4	chr5	IRGM	-1.14085	-2.69903	-2.90926	0.00395547	0.0273918	-2.10333
ENSG00000188859.6	chr1	FAM78B	1.66679	-3.23654	2.93334	0.00367085	0.026175	-2.10391
ENSG00000223704.1	chr22	LINC01422	-0.868682	0.353031	-2.86199	0.00457343	0.0301476	-2.10442
ENSG00000132510.10	chr17	KDM6B	-0.836814	6.93958	-3.01903	0.00280357	0.0218991	-2.10459
ENSG00000232713.2	chr2	AC010733.1	-1.0159	-2.20904	-2.89084	0.00418658	0.0284351	-2.10541
ENSG00000241244.1	chr2	IGKV1D-16	2.0652	1.01833	2.86527	0.00452787	0.0299062	-2.10839
ENSG00000055957.11	chr3	ITIH1	-1.37682	-2.79112	-2.91024	0.00394353	0.0273729	-2.10944
ENSG00000117616.18	chr1	RSRP1	-0.850397	6.06904	-3.0129	0.00285873	0.0221838	-2.10974
ENSG00000214132.4	chr5	AC094103.1	-0.849272	-2.56712	-2.90047	0.00406429	0.0278962	-2.11138
ENSG00000285755.1	chr2	AC132153.1	-1.06787	-1.80102	-2.87613	0.00437996	0.0292554	-2.11322
ENSG00000173535.14	chr8	TNFRSF10C	-1.18922	-0.780418	-2.85994	0.00460215	0.0302283	-2.11409
ENSG00000145936.9	chr5	KCNMB1	-0.935054	-0.872038	-2.86008	0.00460023	0.0302283	-2.11557
ENSG00000183696.14	chr7	UPP1	-1.05698	3.07263	-2.91409	0.00389687	0.0271447	-2.1166
ENSG00000203780.10	chr10	FANK1	-1.19837	-3.17279	-2.9241	0.00377783	0.0266192	-2.11688
ENSG00000229447.2	chr1	AC114495.2	-1.07883	-0.9266	-2.86001	0.0046012	0.0302283	-2.11694
ENSG00000275132.1	chr19	RN7SL663P	-1.08914	-2.17518	-2.88418	0.00427312	0.0287961	-2.11798
ENSG00000284292.1	chr7	AC004922.1	-1.23094	-2.33725	-2.88901	0.00421026	0.0285095	-2.11872
ENSG00000225101.6	chr11	OR52K3P	-1.21755	-1.16222	-2.86151	0.00458014	0.0301526	-2.11972
ENSG00000187134.14	chr10	AKR1C1	-1.36513	-3.11894	-2.91981	0.0038284	0.0268535	-2.12047
ENSG00000207475.1	chr1	SNORA80E	-1.26436	-2.7805	-2.89937	0.00407806	0.0279482	-2.13212
ENSG00000188452.14	chr2	CERKL	-1.39416	-1.40347	-2.85974	0.00460501	0.0302373	-2.13224
ENSG00000163806.16	chr2	SPDYA	-1.12566	-1.35102	-2.8588	0.00461817	0.0302928	-2.13242
ENSG00000122824.11	chrX	NUDT10	-1.38483	-2.67578	-2.89489	0.00413477	0.028226	-2.13274
ENSG00000279649.1	chr16	AC020978.9	-1.20863	-1.57799	-2.86265	0.0045643	0.0300975	-2.13289
ENSG00000008256.16	chr7	CYTH3	-1.2887	3.56662	-2.92779	0.0037348	0.026427	-2.1369
ENSG00000260001.6	chr19	TGFBR3L	1.38802	-2.50188	2.88486	0.0042642	0.0287684	-2.14044
ENSG00000272576.1	chr4	AC027271.1	-0.909303	-2.27618	-2.87539	0.00438991	0.0292733	-2.14457
ENSG00000120594.17	chr10	PLXDC2	-1.07699	3.57839	-2.92428	0.00377573	0.0266192	-2.14789
ENSG00000172554.12	chr2	SNTG2	-1.35982	-4.66601	-3.00502	0.00293106	0.0225712	-2.14864
ENSG00000134222.16	chr1	PSRC1	-0.839681	0.829539	-2.84523	0.00481289	0.03118	-2.15355
ENSG00000240038.6	chr1	AMY2B	-0.95693	3.17516	-2.90434	0.00401598	0.0276493	-2.15401
ENSG00000226268.3	chr11	AC135977.1	0.91499	-2.15647	2.86727	0.00450035	0.0297699	-2.15451
ENSG00000077943.8	chr10	ITGA8	1.56601	1.27622	2.85021	0.0047406	0.0308261	-2.15468
ENSG00000170837.2	chr3	GPR27	-0.917364	0.425982	-2.84181	0.00486313	0.0313999	-2.15476
ENSG00000237940.3	chr2	LINC01238	-1.3229	-0.069784	-2.83906	0.00490388	0.0315518	-2.15814
ENSG00000232891.1	chr6	AL450344.3	-1.02633	1.56377	-2.85364	0.00469139	0.0305654	-2.15826
ENSG00000179909.15	chr19	ZNF154	-0.830246	4.12309	-2.94404	0.00355059	0.0255964	-2.16137
ENSG00000272779.1	chr22	AC245060.4	-0.853948	-2.17502	-2.86371	0.0045495	0.0300392	-2.16365
ENSG00000273391.1	chr7	AC083880.1	-0.975553	-1.90527	-2.85578	0.00466085	0.0304615	-2.16502
ENSG00000174171.5	chr15	AC020659.1	-1.53173	3.52176	-2.91461	0.00389058	0.0271384	-2.16717
ENSG00000127325.19	chr12	BEST3	-1.76736	-0.285652	-2.83438	0.00497391	0.0318271	-2.16965
ENSG00000132465.11	chr4	JCHAIN	1.35168	11.8503	2.97904	0.0031818	0.0237046	-2.17659
[truncated: 268 more rows]

## Sheet: Late_Vs_Early_EScore
	Chr	logFC	logFC	AveExpr	t	P.Value	adj.P.Val	B
[truncated: 3,218 more rows]

[truncated: 1 more sheets: GAM_EScore]
