# Supplementary material for: The Evolution and Subtypes of Waldenstrom Macroglobulinemia: Findings from a Multi-omic Analysis of 249 Treatment Naive MYD88L265P Mutated Patients.
Source: Research Square preprint supplement (doi:10.21203/rs.3.rs-6473628/v1), 2025-04-23
Supplement: Supplementary file 2 [file cf8c93a9b2f1eb4775dc84a7.docx]

**Supplementary Methods**

*Analysis of Clinical Response*

The first therapies received by the 186 patients who received treatment during study follow up were: one patient received single agent bedamustine (BENDA); 43 bendamustine and rituximab (BENDAR); 1 fludarabine and rituximab (FR); 1 cyclophosphamide, prednisone and rituximab (CPR); 6 cyclophosphamide dexamethasone and rituximab (CDR); 20 bortezomib, dexamethasone and rituximab (BDR); 20 carfilzomib, rituximab and dexamethasone (CARD); 13 ixazomib, dexamethasone and rituximab (IDR), 3 single agent rituximab (R), 1 rituximab and dexamethasone (R-dex), 1 single agent ofatumumab (OFA); 48 single agent ibrutinib (IB); 5 ibrutinib and ulocuplumab (IB/ULO); 5 single agent Zanubrutinib (ZANU); 14 single agent RAD001 (RAD001); and 3 ibrutinib and venetoclax (IVEN). A summary of these therapies broken down by WM subtype is shown in supplemental table 1. In addition to evaluating individual therapeutic strategies, these were further grouped into the following categories: Chemotherapy (Chemo; BENDA, BENDAR, FR, CPR and CDR), Proteasome inhibition (Proteasome; CARD, BDR, and IDR), CD20 monoclonal antibody therapy (CD20mab; OFA, R and R-dex), BTK inhibition (BTKi; IB, IB/ULO and ZANU) and Other (Other; RAD001 and IVEN) which is summarized by WM subtype in supplementary table 2. Response and progression free survival were assessed according to the international consensus pane on WM response criteria.1

*Bioinformatic Analysis*

For the RNASeq, the two-pass STAR protocol was used for alignment and count data while salmon down stream of STAR alignment was used for downstream transcript quantification in transcripts per million.2,3 Median library size was 57,881,118 (range 32,038,618 - 245,485,177) reads. Batch effect associated with library construction was noted and accounted for using the sva package.4 Clustering and correlation analysis was conducted using variance stabilized transformation from DESeq2.5 Differential gene expression and gene set enrichment analysis were performed using voom/limma and camera on mSigDB, respectively.6,7 The non-negative matrix factorization, diffusion mapping/pseudotime, and generalized additive model analysis was performed using the NMF, destiny, and gam (<https://CRAN.R-project.org/package=gam>) R packages, respectively.8,9 Whole exome data was aligned using BWA following GATK best practices.10,11 Somatic variants identified by both Mutect2 and Strelka2 were included in the analysis.12 Median target coverage was 207 (range 61-379) reads and 212 (range 32-8,035) for the tumor and germline samples, respectively. The dNdScv package with GRCh38 covariates was used for cancer driver gene detection.13 GATK was used for somatic copy number analysis.14 Due to the use of the non-standard Haloplex libraries, custom panels of normals were created for both the copy number and small variant analysis using the 53 germline controls with the best QC metrics with no evidence of contamination from the WM clone. Somatic variants were annotated using VEP and ultimately converted into MAF format using vcf2maf (<https://github.com/mskcc/vcf2maf>) for visualization in the maftools package.15,16 For the ERRBS analysis, reads were trimmed for adapters, quality and restriction enzyme cut sites using TrimGalore (https://github.com/FelixKrueger/TrimGalore). Methylation calling and GRCh38 alignment was performed using Bismark.17 Downstream analysis of methylation calls was performed using methylKit.18

**Supplementary References**

1. Treon, S. P. *et al.* Report of consensus Panel 4 from the 11th International Workshop on Waldenstrom’s macroglobulinemia on diagnostic and response criteria. *Semin Hematol* **60**, 97–106 (2023).

2. Dobin, A. *et al.* STAR: ultrafast universal RNA-seq aligner. *Bioinformatics* **29**, 15–21 (2013).

3. Patro, R., Duggal, G., Love, M. I., Irizarry, R. A. & Kingsford, C. Salmon provides fast and bias-aware quantification of transcript expression. *Nat Methods* **14**, 417–419 (2017).

4. Leek, J. T., Johnson, W. E., Parker, H. S., Jaffe, A. E. & Storey, J. D. The <tt>sva</tt> package for removing batch effects and other unwanted variation in high-throughput experiments. *Bioinformatics* **28**, 882–883 (2012).

5. Love, M. I., Huber, W. & Anders, S. Moderated estimation of fold change and dispersion for RNA-seq data with DESeq2. *Genome Biol* **15**, 550 (2014).

6. Ritchie, M. E. *et al.* limma powers differential expression analyses for RNA-sequencing and microarray studies. *Nucleic Acids Res* **43**, e47–e47 (2015).

7. Robinson, M. D., McCarthy, D. J. & Smyth, G. K. <tt>edgeR</tt> : a Bioconductor package for differential expression analysis of digital gene expression data. *Bioinformatics* **26**, 139–140 (2010).

8. Angerer, P. *et al.* *destiny* : diffusion maps for large-scale single-cell data in R. *Bioinformatics* **32**, 1241–1243 (2016).

9. Gaujoux, R. & Seoighe, C. A flexible R package for nonnegative matrix factorization. *BMC Bioinformatics* **11**, 367 (2010).

10. DePristo, M. A. *et al.* A framework for variation discovery and genotyping using next-generation DNA sequencing data. *Nat Genet* **43**, 491–498 (2011).

11. Li, H. & Durbin, R. Fast and accurate short read alignment with Burrows–Wheeler transform. *Bioinformatics* **25**, 1754–1760 (2009).

12. Kim, S. *et al.* Strelka2: fast and accurate calling of germline and somatic variants. *Nat Methods* **15**, 591–594 (2018).

13. Martincorena, I. *et al.* Universal Patterns of Selection in Cancer and Somatic Tissues. *Cell* **171**, 1029-1041.e21 (2017).

14. Babadi, M. *et al.* GATK-gCNV enables the discovery of rare copy number variants from exome sequencing data. *Nat Genet* **55**, 1589–1597 (2023).

15. McLaren, W. *et al.* The Ensembl Variant Effect Predictor. *Genome Biol* **17**, 122 (2016).

16. Mayakonda, A., Lin, D.-C., Assenov, Y., Plass, C. & Koeffler, H. P. Maftools: efficient and comprehensive analysis of somatic variants in cancer. *Genome Res* **28**, 1747–1756 (2018).

17. Krueger, F. & Andrews, S. R. Bismark: a flexible aligner and methylation caller for Bisulfite-Seq applications. *Bioinformatics* **27**, 1571–1572 (2011).

18. Akalin, A. *et al.* methylKit: a comprehensive R package for the analysis of genome-wide DNA methylation profiles. *Genome Biol* **13**, R87 (2012).
