# Supplementary material for: The Evolution and Subtypes of Waldenstrom Macroglobulinemia: Findings from a Multi-omic Analysis of 249 Treatment Naive MYD88L265P Mutated Patients.
Source: Research Square preprint supplement (doi:10.21203/rs.3.rs-6473628/v1), 2025-04-23
Supplement: Supplementary file 3 [file d5257b4882c69539eb4d7623.docx]

**Supplementary Figure 1:** **Multi-omic feature identification.** A) Cophenetic and Silhouette plots suggesting 3 to be the optimal number of metagenes for the NMF analysis. B) The first two NMF metagenes stratified samples into BCL and PCL subtypes. C) The same overall pattern from the NMF and diffusion map analysis can be observed in first 3 components of a PCA of the same gene set. Here red is BCL, blue is EWM, and green is PCL with the point size corresponding to DPT value. D) Correlations between DPT/EScore and (from top to bottom) NMF metagene 3, Diffusion component 1, and PCA principal component 1. E) Splitting DPT values into Early and Late EScore.

**Supplementary Figure 2:** **Characterizing the subtypes of WM.** A) Expression of key signature genes previous associated with *CXCR4* mutation status colored by subtype membership. Note that the EWM group has intermediate expression overall and lacks a bimodal distribution indicating intermediate expression of these genes in early stages of WM development regardless of subtype. B) RNASeq positional gene set enrichment results based on 6q deletion status for BCL and PCL subtyped samples. Note that no 6q results were unique the BCL and suggests that the deletions in BCL are restricted to the 6q16-6q25 while the whole q arm is typically lost in PCL. C) Representative examples from BCL and PCL samples with 6q deletions. Data shown is the denoised copy ratio as determined by the GATK pipeline. Color changes demarcate new copy segments. D) Expression of B-cell and plasma cell transcription factors by expanded WM subtype.

**Supplementary Figure 3:** **A 5-way split of the WM EScore.** A) Using the diffusion pseudotime space to divide the EScore into Very Early, Early, Intermediate, Late and Very Late EScore levels. The first three categories would fall under Early in the previous Early/Late stratification. B) The impact of the expanded EScore categories on time to first therapy from study biopsy.

**Supplementary Figure 4:** **Thirteen color flow cytometry analysis of Early EScore markers.** A) Representative healthy donor peripheral blood sample. Mononuclear cells were gated for CD19+ Lambda light chain + following the exclusion of doublets and dead cells. Gated cells were negative for all markers as expected. A table of antibody clones and fluorophores used are available in Supplementary Table 3. Gates were set using single staining controls. B) A previously untreated WM patient. The same strategy was used as described in A, but for bone marrow mononuclear cells from an untreated patient with WM. In this case, subpopulations expressing CD138, CD34, CD33, CD16, and CD34 are observed. Minor populations expressing CD66b and CD8A are also observed. Both figures were standardized to 1.27 million lives cells.

**Supplementary Figure 5:** **Thirteen color flow cytometry analysis of a patient with relapsed WM.**BM mononuclear cells from a patient relapsing post ibrutinib and venetoclax combination therapy. Gating on live single cells that were CD19+ Lambda light chain+ revealed a sizable sub population of cells positive for CD138 and CD16. A smaller population with other markers is also observed consistent with the persistence of the clone associated with Early EScore. This figure was standardized to 1.27 million live cells.
