# Supplementary material for: The Evolution and Subtypes of Waldenstrom Macroglobulinemia: Findings from a Multi-omic Analysis of 249 Treatment Naive MYD88L265P Mutated Patients.
Source: Research Square preprint supplement (doi:10.21203/rs.3.rs-6473628/v1), 2025-04-23
Supplement: Supplementary file 4 [file d54a2bffad42d9474cd17c09.docx]

**Supplementary Tables**

**Supplementary Table 1:** **Summary of primary therapies received by study patients.** Abbreviations for the therapeutic regimens received as primary therapy are as follows: bendamustine (BENDA); bendamustine and rituximab (BENDAR); fludarabine and rituximab (FR); cyclophosphamide, prednisone and rituximab (CPR); cyclophosphamide dexamethasone and rituximab (CDR); bortezomib, dexamethasone and rituximab (BDR); carfilzomib, rituximab and dexamethasone (CARD); ixazomib, dexamethasone and rituximab (IDR); rituximab monotherapy (R); rituximab and dexamethasone (R-dex); ofatumumab monotherapy (OFA); ibrutinib monotherapy (IB); ibrutinib and ulocuplumab (IB/ULO); single zanubrutinib monotherapy (ZANU); RAD001 (RAD001); and ibrutinib and venetoclax (IVEN).

**Supplementary Table 2:** Primary therapies by Subtype.
Individual first line therapeutic approaches were grouped into broad categories to see if there were differences in progression free survival based on overall therapeutic approach. The categories were defined as follows: Chemotherapy (Chemo; BENDA, BENDAR, FR, CPR and CDR); Proteosome inhibitor-based therapy (Proteosome; CARD, BDR, and IDR); CD20 monoclonal antibody therapy (CD20mab; OFA, R and R-dex); BTK inhibitor (BTKi; IB, IB/ULO and ZANU) and Other (Other; RAD001 and IVEN).

**Supplementary Table 3:** **Thirteen color flow cytometry panel.**

**Supplementary Table 4: Median expression values of the 50 signature genes used to discriminate the WM subtypes.** Median expression values in transcripts per million for each of the 50 signature genes. Note that while the median value of *AC025434.1* was 0 for all subtypes, the mean BCL level of 0.0194 was over nine times lower than the mean of 0.183 found in PCL.

|  | **B-Cell Like** | **Unsubtyped** | **Plasma Cell Like** |
| --- | --- | --- | --- |
| *ABCB4* | 5.30 | 1.79 | 0.75 |
| *AC011944.1* | 0.37 | 0.68 | 2.04 |
| *AC025434.1* | 0.00 | 0.00 | 0.00 |
| *ACE* | 3.99 | 0.60 | 0.34 |
| *ANKRD36BP2* | 7.93 | 22.34 | 35.12 |
| *CABLES1* | 1.18 | 5.87 | 12.94 |
| *CD9* | 51.07 | 143.17 | 450.69 |
| *CDK5R1* | 3.67 | 1.57 | 0.54 |
| *CHDH* | 2.78 | 7.40 | 16.55 |
| *DUSP22* | 77.79 | 228.88 | 452.46 |
| *EEF1A2* | 1.18 | 0.29 | 0.15 |
| *FAM81A* | 1.40 | 0.55 | 0.09 |
| *GPER1* | 1.86 | 13.08 | 43.70 |
| *GPR18* | 38.97 | 18.61 | 7.89 |
| *HTR3A* | 2.20 | 0.52 | 0.18 |
| *IL17RB* | 5.04 | 17.74 | 52.89 |
| *KANK1* | 1.75 | 7.96 | 18.78 |
| *KCNN3* | 1.37 | 2.46 | 5.28 |
| *KLF14* | 1.06 | 0.08 | 0.01 |
| *L1CAM* | 1.29 | 0.39 | 0.17 |
| *LGALS3BP* | 6.27 | 20.66 | 49.62 |
| *LINC00494* | 15.23 | 3.86 | 1.06 |
| *LINC00887* | 0.14 | 0.98 | 3.31 |
| *LINC01857* | 58.62 | 19.95 | 9.54 |
| *LRRC31* | 0.03 | 0.41 | 0.85 |
| *MIR99AHG* | 0.00 | 0.26 | 1.37 |
| *MIXL1* | 3.20 | 7.47 | 16.09 |
| *MYO1E* | 7.46 | 2.54 | 0.91 |
| *MYO6* | 0.44 | 2.94 | 5.90 |
| *NEB* | 1.15 | 6.61 | 21.44 |
| *PDE7B* | 1.04 | 0.29 | 0.06 |
| *PEG10* | 7.17 | 2.59 | 0.87 |
| *PRDM5* | 0.10 | 1.54 | 5.57 |
| *PURPL* | 0.00 | 0.47 | 0.90 |
| *RASSF6* | 6.50 | 23.80 | 65.87 |
| *RCAN3* | 11.94 | 4.58 | 1.12 |
| *RFTN1* | 20.77 | 10.84 | 3.32 |
| *RP9P* | 2.16 | 0.79 | 0.33 |
| *SMIM14* | 101.12 | 37.87 | 14.69 |
| *SNAI2* | 0.11 | 1.27 | 5.75 |
| *THSD7B* | 0.01 | 0.14 | 0.54 |
| *TLR7* | 4.94 | 2.68 | 0.61 |
| *TMEM56* | 9.77 | 2.89 | 0.61 |
| *TP53I11* | 23.62 | 9.91 | 2.73 |
| *UGCG* | 54.71 | 18.67 | 12.48 |
| *USP44* | 1.81 | 0.52 | 0.15 |
| *UST* | 2.57 | 0.76 | 0.22 |
| *WNK2* | 0.36 | 10.13 | 31.14 |
| *ZNF516* | 3.29 | 1.90 | 0.52 |
| *ZNF831* | 1.76 | 0.70 | 0.32 |

**Supplementary Table 5: Clinical and genomic differences between BCL and PCL subtypes.**Positive counts with percentages (%) and medians with range values shown. Significance testing was performed with Fisher’s exact test or Wilcoxon rank sum test.

**Supplementary Table 6: Clinical characteristics of patients tested using the 13-color flow cytometry panel.**
